# Supplementary material for: Phenotype Prediction and Genome-Wide Association Study Using Deep Convolutional Neural Network of Soybean
Source: Front Genet. 2019 Nov 22;10:1091. doi: 10.3389/fgene.2019.01091 (PMC6883005; doi:10.3389/fgene.2019.01091)
Supplement: Supplemental Table1 — Each column in the table represents: SNP: SNP ID wald_protein: Wald test value of protein sigma2_protein: estimated residual variance of protein eff_protein: estimated allele effect of protein saliency_protein: saliency value of protein wald_yield: Wald test value of yield sigma2_yield: estimated residual variance of yield eff_yield: estimated allele effect of yield saliency_yield: saliency value of yield wald_oil: Wald test value of oil sigma2_oil: estimated residual variance of oil eff_oil: estimated allele effect of oil saliency_oil: saliency value of oil wald_height: Wald test value of height sigma2_height: estimated residual variance of height eff_height: estimated allele effect of height saliency_height: saliency value of height wald_moisture: Wald test value of moisture sigma2_moisture: estimated residual variance of moisture eff_moisture: estimated allele effect of moisture saliency_moisture: saliency value of moisture. [file Table_1.xlsx]

## Sheet: SoyNAM
SNP	wald_protein	sigma2_protein	eff_protein	saliency_protein	wald_yield	sigma2_yield	eff_yield	saliency_yield	wald_oil	sigma2_oil	eff_oil	saliency_oil	wald_height	sigma2_height	eff_height	saliency_height	wald_moisture	sigma2_moisture	eff_moisture	saliency_moisture
Gm01_3321482	8883.51	0.791257	-0.0409897	0.00320543	11765.9	0.708689	-0.0405176	0.00328791	2971.5	0.772343	0.0243979	0.00415246	2019.94	0.728455	-0.0210738	0.00265754	127.722	0.795199	-0.00518162	0.00198559
Gm01_4755976	6609.86	0.791306	-0.0436752	0.00458109	3965.5	0.709052	0.0290801	0.00459714	6914.8	0.771966	0.0460428	0.00760338	5649.22	0.728124	-0.0436211	0.00434248	1277.62	0.795096	-0.0202782	0.00342118
Gm01_8340015	2462.71	0.791619	0.0306888	0.00493013	343.277	0.709287	-0.00963676	0.00633221	10717.7	0.771492	-0.0674391	0.00786674	289.726	0.72856	-0.0121363	0.00597662	164.717	0.795191	-0.00855438	0.00510295
Gm01_9714061	3693.81	0.791486	0.0391517	0.00543198	933.449	0.709241	0.0165189	0.00830554	17205.2	0.770778	-0.0895044	0.011415	158.904	0.728572	0.00954864	0.00678197	661.217	0.795136	-0.0179577	0.00602532
Gm01_10510009	1580.58	0.791699	0.0251237	0.00509383	1906.65	0.709169	0.0231377	0.00860008	8717.86	0.771666	-0.0623545	0.00881429	2106.32	0.72837	-0.0337322	0.00784906	118.624	0.795195	0.00743843	0.00599933
Gm01_28793495	396.927	0.79182	-0.0110411	0.00484543	19071	0.708003	-0.0669249	0.0128319	38.0441	0.77254	0.00351776	0.00809199	3293.26	0.728311	0.0341717	0.00771516	368.427	0.795175	0.0112112	0.00635919
Gm01_34588039	158.549	0.791835	0.00986797	0.00495707	722.804	0.709243	-0.0182388	0.00775142	57.1385	0.772536	-0.00613568	0.00737925	413.423	0.728539	-0.0173385	0.00646378	2155.24	0.79493	0.0385616	0.00744353
Gm01_38475026	1284.7	0.791669	-0.0333695	0.00560023	811.579	0.70922	-0.0228881	0.00745278	2461.95	0.772185	0.0478681	0.00883849	27.4717	0.728585	-0.00531781	0.00641228	967.759	0.79506	-0.0307283	0.00655264
Gm01_38891638	2724.65	0.791338	0.0640105	0.00627766	32.7595	0.709307	-0.00587531	0.00702757	2566.88	0.77204	-0.0659163	0.0073837	397.487	0.728509	0.0284034	0.0064172	244.793	0.795158	-0.0208037	0.00623998
Gm01_38919120	3783.78	0.791163	0.0727696	0.00747864	23.506	0.709309	-0.00481548	0.00667171	3074.69	0.771963	-0.0694438	0.00801077	615.876	0.72847	0.033901	0.00603238	116.811	0.795185	-0.0138381	0.00620582
Gm01_39354140	634.61	0.791707	-0.0376677	0.00675142	786.639	0.709174	0.0346201	0.00681781	46.8012	0.772532	-0.0110194	0.00634354	11.7777	0.728586	-0.00622055	0.00580155	28.2162	0.795201	0.00872703	0.00648554
Gm01_39591768	1828.27	0.791415	-0.0664059	0.0070082	1172.19	0.7091	0.0436994	0.0069533	7.84258	0.772541	0.00470335	0.00657888	0.080005	0.728589	0.000538653	0.00602508	15.983	0.795204	-0.00684618	0.00594315
Gm01_39642734	3219.25	0.791119	-0.0838751	0.00716869	904.871	0.709155	0.0367449	0.00679725	223.938	0.772489	0.0237975	0.00585189	0.977076	0.728589	0.00176307	0.00621676	474.449	0.795089	-0.0353345	0.00658082
Gm01_39831714	879.347	0.791653	-0.0439318	0.00659105	1557.05	0.70904	0.0486275	0.00652143	72.2361	0.772526	-0.0135329	0.0054859	8.72988	0.728587	-0.005272	0.00626786	107.087	0.795181	-0.0168098	0.00651609
Gm01_39853236	45.8321	0.791841	-0.0121955	0.00635806	9.60522	0.70931	-0.00454674	0.00645418	26.418	0.772535	0.010093	0.00558362	475.023	0.728437	0.0491434	0.0067677	20.7567	0.795202	0.00911522	0.00595601
Gm01_40577463	0.562706	0.791854	0.00134547	0.00587702	511.726	0.709206	-0.0330825	0.00646337	53.0068	0.772527	0.014261	0.00529696	206.519	0.728523	0.0324878	0.00681299	174.263	0.795154	0.026339	0.00627807
Gm01_40624109	26.2839	0.791846	-0.00960412	0.00562524	198.634	0.709269	-0.0214387	0.00602378	35.0191	0.772532	0.01217	0.00511827	542.832	0.728405	0.0558829	0.00688968	162.273	0.795155	0.0266718	0.00619075
Gm01_41204902	40.4125	0.791842	-0.0119522	0.00553215	246.393	0.709259	-0.023961	0.00620133	41.6333	0.77253	0.013322	0.00553785	481.864	0.728425	0.0529039	0.00699559	87.5625	0.795179	0.0196698	0.00628828
Gm01_41873812	7.04359	0.791852	-0.00498593	0.00530652	446.476	0.709216	-0.0322322	0.00606309	62.0471	0.772524	0.0162493	0.00527223	393.421	0.728455	0.047764	0.00669848	3.54438	0.795207	0.00395417	0.00624778
Gm01_41904086	5.15297	0.791852	-0.00426505	0.00551238	499.15	0.709204	-0.0340871	0.0062089	81.4541	0.772518	0.0186178	0.00530851	354.36	0.728468	0.0453224	0.00650116	0.241957	0.795208	0.00103314	0.00648007
Gm01_42085990	2.81679	0.791853	-0.0031034	0.00555289	566.355	0.709191	-0.0358463	0.00644922	24.4362	0.772535	0.0100127	0.00510793	287.667	0.728493	0.0399002	0.0064415	34.903	0.795197	-0.0121862	0.00605943
Gm01_42204672	12.363	0.79185	0.00640614	0.00591664	589.674	0.709187	-0.0362499	0.00668114	87.9439	0.772516	0.0186856	0.00520698	52.5054	0.728572	0.0167148	0.00659578	36.3056	0.795197	-0.0122284	0.00638141
Gm01_42629908	1767.93	0.791542	0.047993	0.00680636	1847.25	0.709052	0.0426048	0.00899628	145.877	0.772517	-0.0141906	0.00546434	6964.7	0.727388	0.101671	0.00800157	1718.56	0.794887	0.0498702	0.00701288
Gm01_43040014	405.7	0.791753	-0.0323078	0.00621242	190.445	0.709276	0.0184316	0.00648668	393.225	0.772441	0.0342141	0.00533288	308.569	0.728504	0.0340236	0.00707164	149.513	0.795167	0.021523	0.00620072
Gm01_43068540	435.133	0.791747	-0.0332294	0.00583637	253.969	0.709264	0.0211492	0.0064695	376.925	0.772446	0.0332472	0.00519472	260.524	0.728518	0.0309934	0.00653918	134.815	0.795171	0.0202863	0.00588255
Gm01_43140215	84.6817	0.791833	-0.0143225	0.00615219	498.832	0.70922	0.0289983	0.00726804	240.74	0.772482	0.0258632	0.00542112	376.334	0.72849	0.0359927	0.00692869	61.1316	0.795192	0.0133012	0.00569012
Gm01_43216800	571.657	0.791737	-0.0316235	0.00619681	0.728881	0.709312	-0.000958299	0.00707644	2965.37	0.771929	0.0749096	0.00604082	80.0163	0.728573	-0.0129777	0.00792636	193.481	0.795166	-0.0195946	0.00625548
Gm01_43514372	22.179	0.791848	-0.00822295	0.00624309	4053.55	0.708482	0.0920396	0.0071447	369.556	0.772439	0.0356938	0.00577359	459.656	0.728456	0.043711	0.00613777	153.217	0.795163	-0.0234723	0.00582295
Gm01_43645223	1132.88	0.791462	-0.0753783	0.00659377	2807.41	0.70859	0.096165	0.00731536	533.234	0.772347	0.0563735	0.00628233	422.582	0.728421	0.0577612	0.00597719	4.00134	0.795206	0.00497667	0.00533092
Gm01_43770219	878.028	0.791539	-0.0687975	0.00668135	2704.46	0.708594	0.0974012	0.00697349	786.88	0.772242	0.0712583	0.00615554	274.52	0.728475	0.0487265	0.00574639	6.79868	0.795205	0.00674855	0.00554499
Gm01_43796439	903.49	0.791532	-0.0693863	0.00690903	2784.07	0.708577	0.0983385	0.00692985	774.833	0.772248	0.0702476	0.00631108	216.871	0.728499	0.0430496	0.00572011	0.836597	0.795208	-0.00235198	0.00591882
Gm01_43822355	529.944	0.791667	-0.0524648	0.00642455	2281.28	0.708716	0.088089	0.00700209	627.248	0.772308	0.0622975	0.00668216	298.098	0.728468	0.0495636	0.00577267	6.33774	0.795206	0.00638115	0.00587803
Gm01_43856898	1.52235	0.791853	0.00231149	0.00694745	2133.97	0.708845	0.0713686	0.00688141	145.606	0.772499	-0.0241517	0.00713267	1172.56	0.728222	0.0757211	0.00588293	73.2493	0.795185	-0.0174865	0.00596009
Gm01_43878915	1023.43	0.791487	-0.0743433	0.00707237	2211.92	0.708724	0.0882768	0.00706976	765.859	0.772249	0.0703849	0.00677892	119.822	0.728539	0.0323184	0.0062573	14.1378	0.795202	0.00974312	0.00630154
Gm01_43905376	206.671	0.79179	-0.0286221	0.00713167	1933.35	0.708864	0.0718263	0.00695801	90.3035	0.772514	0.0203361	0.00642632	54.0497	0.728571	0.017613	0.00628419	292.148	0.795109	-0.0373135	0.00630855
Gm01_43956122	1046	0.791481	-0.0747356	0.00698353	1770.46	0.708843	0.078624	0.00673194	900.838	0.7722	0.0758008	0.00692739	115.537	0.728541	0.0314189	0.00628317	82.658	0.795175	0.0233973	0.00671156
Gm01_43979136	296.161	0.791753	0.037936	0.00704432	93.396	0.709288	0.0174307	0.00714596	0.0326498	0.772543	0.000430163	0.0062474	0.0480386	0.728589	0.000588055	0.00652524	370.262	0.795069	-0.0467075	0.00666277
Gm01_44034244	403.665	0.791714	0.0449343	0.0068041	108.823	0.709284	0.019063	0.00766418	0.484869	0.772543	-0.00168481	0.00602544	42.0711	0.728573	-0.0177462	0.0073092	350.023	0.795074	-0.0461486	0.0069446
Gm01_44127031	1341.31	0.791379	-0.0840158	0.00712741	3797.77	0.708313	0.114422	0.00734089	712.906	0.772274	0.0667367	0.0064172	764.979	0.728278	0.0793615	0.00718924	45.4893	0.79519	0.0171825	0.00701462
Gm01_44196291	964.133	0.791507	-0.0723237	0.00706287	3739.47	0.708314	0.115217	0.00757694	524.619	0.772342	0.058225	0.00683591	586.407	0.728346	0.0709149	0.00756234	110.54	0.795164	0.0272336	0.00698655
Gm01_44260009	941.863	0.791518	-0.0708744	0.00721513	3628.32	0.708351	0.112616	0.00695654	461.981	0.772368	0.0541185	0.00658206	410.084	0.728421	0.0586173	0.00742088	352.674	0.795068	0.0481786	0.00737398
Gm01_44395542	453.903	0.791693	0.0487845	0.00641182	647.033	0.709141	0.0474671	0.00703563	222.571	0.77246	-0.0370528	0.00642512	52.6342	0.728568	-0.0204826	0.00725811	198.906	0.79513	-0.0357067	0.00700328
Gm01_44427389	449.328	0.791695	0.0483499	0.00678046	353.517	0.709219	0.0349573	0.00636087	197.483	0.772469	-0.0347619	0.0062794	332.23	0.728457	-0.0512277	0.00668972	121.099	0.795161	-0.0277502	0.0064051
Gm01_44553966	108.298	0.791816	0.0237118	0.00657978	404.404	0.709206	0.0373283	0.00592856	14.2875	0.772538	-0.00934168	0.00570214	236.786	0.728495	-0.0432161	0.00667544	228.735	0.795119	-0.0380978	0.00696714
Gm01_44639502	26.6633	0.791844	0.0119045	0.00669829	276.904	0.709238	0.0312161	0.00608686	8.12604	0.77254	0.00713847	0.00597963	624.338	0.728337	-0.0712933	0.00628211	84.2627	0.795175	-0.0234282	0.00621928
Gm01_44716333	566.15	0.791628	-0.0613555	0.00690144	130.875	0.709274	0.0237993	0.00599358	49.0279	0.772522	0.0198027	0.00643315	296.301	0.728451	-0.0564776	0.00596541	0.842505	0.795208	-0.00264354	0.00595852
Gm01_44766507	820.087	0.791542	-0.0705495	0.00667666	450.89	0.709184	0.0424967	0.00595948	42.7962	0.772526	0.0175728	0.00625988	197.886	0.728503	-0.0433197	0.00577303	29.1019	0.795196	-0.0147651	0.00635949
Gm01_44785197	1102.41	0.791427	-0.0832836	0.00710987	196.172	0.709256	0.028407	0.00592703	212.011	0.772455	0.0399839	0.00635282	137.671	0.728527	-0.0372638	0.00585257	5.48522	0.795206	-0.00655114	0.00625045
Gm01_44832947	1157.06	0.791404	-0.0856488	0.00696281	210.271	0.709251	0.0295096	0.00622083	367.493	0.77239	0.0528743	0.00636605	345.681	0.728433	-0.059387	0.0054894	2.60607	0.795207	-0.00453562	0.00592107
Gm01_44893034	950.73	0.791499	-0.0745605	0.00670097	234.32	0.709247	0.0300191	0.00654212	86.493	0.772509	0.0245332	0.00637412	191.865	0.728507	-0.0419678	0.00623008	91.869	0.79517	-0.0257606	0.00631435
Gm01_44922432	1229.85	0.791435	-0.0772555	0.00662085	1176.94	0.709012	0.0617265	0.00623631	356.441	0.772415	0.0449114	0.00647838	218.352	0.728506	-0.0395337	0.00600125	346.611	0.795078	-0.0451658	0.0064644
Gm01_44944261	1631.12	0.79122	-0.101659	0.00678641	229.488	0.709246	0.0308036	0.00633525	669.372	0.772265	0.0714021	0.00626745	377.825	0.728418	-0.062278	0.00586744	100.77	0.795164	-0.028221	0.00653138
Gm01_45053878	1091.82	0.79143	-0.0830629	0.00676171	144.621	0.70927	0.0244213	0.00631456	580.075	0.772302	0.0663602	0.00592821	694.555	0.728274	-0.0842653	0.00600611	94.9752	0.795167	-0.0273518	0.00591655
Gm01_45119676	1141.48	0.791415	-0.0840904	0.00676389	195.539	0.709256	0.0281442	0.00687283	671.5	0.772267	0.0706096	0.00586373	486.59	0.728371	-0.0696029	0.0058261	181.154	0.79513	-0.0373617	0.00570323
Gm01_45145490	430.271	0.791696	-0.0492685	0.00642382	46.5193	0.709299	0.0131548	0.00653459	249.338	0.772446	0.0408413	0.0063071	356.048	0.72844	-0.0559293	0.00562251	110.605	0.795163	-0.0277198	0.00602772
Gm01_45171495	193.47	0.791785	-0.0321901	0.00624155	322.699	0.709226	0.0338345	0.00668835	119.618	0.772498	0.0274849	0.00573562	651.637	0.728325	-0.0731025	0.00550139	161.092	0.795144	-0.0325091	0.00549986
Gm01_45193520	137.087	0.791814	0.0219998	0.00607941	468.639	0.709209	0.0336733	0.00696751	15.6143	0.772538	-0.00792799	0.00536186	1394.53	0.728151	-0.0827038	0.00531365	581.769	0.795023	-0.0493906	0.00571127
Gm01_45275480	83.9472	0.791829	0.0171913	0.00601907	794.48	0.709137	0.0437862	0.00684271	5.82204	0.772541	-0.00483314	0.00527343	1060.99	0.728257	-0.0720026	0.00529052	504.16	0.795048	-0.0459054	0.00574388
Gm01_45794251	549.238	0.791766	-0.0241236	0.00616036	664.732	0.709229	-0.0227791	0.00735185	36.0313	0.772537	0.0064302	0.00571647	166.914	0.728562	-0.0146939	0.00563257	50.181	0.795199	-0.00776412	0.00574333
Gm01_46002295	827.301	0.791722	-0.0296441	0.00618024	952.756	0.709192	-0.0273364	0.00668171	62.4644	0.772533	0.00847738	0.00590425	141.018	0.728566	-0.0135396	0.00557748	79.2544	0.795195	-0.00977003	0.00565193
Gm01_47026025	3222.87	0.791171	-0.0779322	0.00799157	120.526	0.709292	-0.0129905	0.00585295	2531.11	0.772001	0.0715207	0.00694163	640.088	0.728454	-0.037798	0.00565958	43.7735	0.795198	-0.00963487	0.00533961
Gm01_47209247	1176.66	0.791569	-0.0537096	0.00719252	124.144	0.709288	0.015022	0.00622542	434.393	0.772437	0.0338731	0.0063927	1220.12	0.728293	-0.059822	0.0065742	349.61	0.795118	-0.0311026	0.00562308
Gm01_47749524	2.57644	0.791853	-0.00327285	0.00689335	385.228	0.709217	0.0340685	0.00587839	265.742	0.772457	0.0349506	0.00632507	15.194	0.728584	-0.00900499	0.00628115	177.388	0.795148	-0.0291917	0.00535678
Gm01_47810398	213.262	0.791774	0.0355013	0.00707461	40.3127	0.7093	0.012967	0.00558853	76.199	0.772513	0.022629	0.00613806	168.07	0.728521	-0.0371533	0.00619022	185.735	0.795132	-0.0360666	0.00579442
Gm01_47818521	75.6449	0.791825	0.0216921	0.00633771	4.30703	0.709311	0.00434114	0.00568086	115.211	0.772497	0.0286082	0.00598358	94.8447	0.728549	-0.0288195	0.00602749	152.616	0.795144	-0.0336076	0.00584062
Gm01_47824189	60.8298	0.79183	0.0196038	0.00642375	11.9976	0.709309	0.00726185	0.00555388	153.816	0.772481	0.0333316	0.00637219	124.713	0.728536	-0.0333589	0.00624839	93.1001	0.795168	-0.0264681	0.00609546
Gm01_47842495	72.1454	0.791824	0.0225641	0.00638962	101.275	0.709281	0.0221142	0.0056675	159.738	0.772474	0.0360042	0.0060034	2.48586	0.728588	-0.00501547	0.00619125	13.3142	0.795202	-0.0106074	0.00617421
Gm01_47851822	32.735	0.79184	0.0150533	0.00640455	78.4513	0.709288	0.0193213	0.0055426	249.287	0.772437	0.0444278	0.00605982	51.4177	0.728566	0.0224041	0.00598227	149.865	0.795141	0.0351604	0.00582035
Gm01_47864576	81.0728	0.79182	0.0246029	0.00661793	0.0154627	0.709312	0.000281573	0.0056991	76.871	0.772509	0.0256846	0.00628689	3.22637	0.728588	0.00586424	0.00591684	176.909	0.795126	0.039758	0.00598704
Gm01_47870156	0.238072	0.791854	-0.00140364	0.00644355	140.155	0.709265	-0.0280298	0.00549519	283.939	0.77241	0.0522474	0.00619704	44.0748	0.728567	-0.0231911	0.00560652	12.1956	0.795202	0.0110454	0.00627864
Gm01_47876381	16.1849	0.791847	-0.0113907	0.00642126	121.973	0.709272	-0.0257697	0.00542575	337.979	0.772388	0.0560253	0.00632911	70.8851	0.728555	-0.0288312	0.00557737	32.7177	0.795192	0.0177837	0.00626428
Gm01_47889672	0.164103	0.791854	0.00115225	0.00638305	64.6883	0.709291	-0.0188421	0.00556321	310.462	0.7724	0.0539618	0.00650398	1.09005	0.728589	-0.00359497	0.00546341	42.9521	0.795187	0.0204759	0.00682452
Gm01_47901802	31.4181	0.79184	0.0158254	0.00640046	43.4936	0.709298	-0.0153539	0.00616949	47.4534	0.772521	0.020916	0.00610259	83.3761	0.728549	0.0310769	0.00593468	387.672	0.795022	0.060974	0.00737744
Gm01_47915539	1.69976	0.791853	-0.00377866	0.00609531	19.1062	0.709306	-0.0104382	0.00639771	315.926	0.772394	0.0554217	0.00690043	12.6678	0.728583	0.0124404	0.00536108	315.169	0.795053	0.0564674	0.00773078
Gm01_47982314	487.693	0.791723	-0.0384651	0.00615897	2622.06	0.708757	-0.0764014	0.00623217	174.413	0.772495	0.0241541	0.00620288	578.878	0.728428	-0.0472233	0.00604762	884.591	0.794952	-0.0556011	0.00782525
Gm01_47993748	846.013	0.791601	-0.0561918	0.00603419	2568.54	0.708723	-0.0820444	0.00696444	118.099	0.772507	0.0221906	0.00608575	181.617	0.728532	-0.0298902	0.00587377	1901.13	0.794594	-0.0909076	0.00842382
Gm01_48032636	220.161	0.791772	-0.0358607	0.0061943	1195.58	0.708973	-0.0691578	0.00643842	46.3114	0.772525	0.0176363	0.00614692	51.2468	0.728568	-0.0207024	0.00566064	1258.07	0.794693	-0.0937387	0.00722065
Gm01_48057849	170.637	0.79179	-0.0316762	0.00594398	1809.28	0.708798	-0.0853238	0.00619937	79.3855	0.772512	0.0231746	0.00625871	72.9185	0.728559	-0.0248039	0.00561329	1194.14	0.794717	-0.0916598	0.00699622
Gm01_48079606	113.167	0.791804	-0.0304142	0.00598175	0.23039	0.709312	0.00114402	0.00851024	291.447	0.772409	0.0519237	0.0064718	133.666	0.728526	0.0383643	0.00630275	98.4247	0.795161	0.0308194	0.00997555
Gm01_48087738	259.065	0.791756	-0.0394633	0.00609619	1878.47	0.708772	-0.0879197	0.00654276	31.3294	0.77253	0.0147273	0.00618046	54.2197	0.728567	-0.0216497	0.00580351	1461.8	0.7946	-0.102567	0.0070495
Gm01_48126639	434.561	0.791689	-0.05108	0.00661732	2099.38	0.708708	-0.0929327	0.00667172	91.7512	0.772507	0.025176	0.00636326	0.668096	0.728589	-0.00239777	0.00608566	1575.3	0.794554	-0.106364	0.00774657
Gm01_48156192	309.247	0.79174	-0.0417468	0.00656913	1058.38	0.709016	-0.0642424	0.00751227	65.0261	0.772518	0.0204617	0.00629512	105.021	0.728547	-0.0288119	0.006599	877.788	0.794856	-0.0767056	0.00716709
Gm01_48169617	713.958	0.791601	-0.0612547	0.00660241	1073.52	0.709022	-0.0625235	0.00703055	655.179	0.772302	0.0625038	0.00630541	470.822	0.72841	-0.0583094	0.00692261	1152.36	0.794763	-0.0846186	0.00701966
Gm01_48181071	259.154	0.791733	-0.0484667	0.00662915	322.73	0.709198	0.0447645	0.00751699	551.963	0.772275	0.0757166	0.0066843	401.543	0.728387	0.0712429	0.00681645	10.1639	0.795203	-0.0104904	0.00715326
Gm01_48193736	194.724	0.791761	-0.0429481	0.00660886	346.529	0.709187	0.047309	0.00767625	181.964	0.772452	0.0445731	0.00653022	684.522	0.728234	0.0958223	0.00690564	24.6858	0.795195	0.0167537	0.0068464
Gm01_48205471	69.1006	0.791825	-0.0225412	0.00636991	435.862	0.709172	0.0472813	0.00752207	109.138	0.772496	0.0300553	0.00626513	604.752	0.728321	0.0767752	0.00716943	45.0352	0.795187	0.0197227	0.00775437
Gm01_48234345	558.503	0.791639	-0.0587725	0.00674504	1312.75	0.708929	-0.074601	0.00776271	76.666	0.772512	0.0233589	0.00613659	20.5082	0.728581	-0.0134601	0.00684118	1317.37	0.794652	-0.0987396	0.00784635
Gm01_48256496	590.453	0.79163	-0.0597329	0.0063421	1339.58	0.708925	-0.0745406	0.00704491	58.1966	0.77252	0.0200919	0.00582762	466.457	0.728396	-0.0631923	0.00688565	2838.42	0.794028	-0.142989	0.0075068
Gm01_48277644	471.154	0.791675	-0.0534015	0.00653512	1114.8	0.70899	-0.0680349	0.00729067	30.3886	0.772531	0.0145324	0.00595165	178.027	0.728515	-0.0390863	0.00718696	2884.4	0.794008	-0.14427	0.00786993
Gm01_48283025	25.8229	0.791841	-0.0162974	0.00615761	739.389	0.709036	0.0715307	0.00688153	14.3563	0.772535	0.013118	0.00571105	820.895	0.728138	0.110972	0.00808095	111.98	0.795147	-0.0373613	0.00755838
Gm01_48301707	489.127	0.791644	-0.0614275	0.00657443	945.627	0.709004	0.0705829	0.00619038	11.2626	0.772538	0.00998248	0.00595088	131.606	0.728528	-0.0377014	0.00684107	318.354	0.795058	-0.0541573	0.00675939
Gm01_48319214	45.363	0.791831	0.0214327	0.00619108	162.349	0.709252	0.0331732	0.00602319	5.24583	0.77254	-0.0078982	0.00609452	334.37	0.728404	0.0713064	0.00726285	170.165	0.795115	0.0458537	0.00809547
Gm01_48326572	316.564	0.791719	-0.0491621	0.00655251	976.96	0.708996	0.071291	0.00561721	1.07279e-07	0.772543	-9.70731e-07	0.00598738	250.35	0.728472	-0.0520343	0.00744439	148.172	0.795139	-0.0368109	0.00688585
Gm01_48362668	333.075	0.791715	-0.0491822	0.0067595	729.291	0.709082	0.0601721	0.00561913	10.7139	0.772538	0.00944485	0.00581408	618.623	0.728309	-0.0793977	0.00722125	155.073	0.795137	-0.0366701	0.00671266
Gm01_48369235	103.502	0.791804	0.0315522	0.00643509	91.6988	0.709279	0.0242701	0.00540164	5.46924	0.77254	-0.00787659	0.00602528	38.6218	0.728568	0.0238425	0.00670597	127.632	0.79514	0.038778	0.0057905
Gm01_48378046	44.6119	0.791832	0.0207579	0.00667715	39.7715	0.709298	0.0160074	0.00562403	0.611383	0.772543	0.00264195	0.00590158	32.2391	0.728572	0.0219193	0.00618682	134.018	0.795136	0.039859	0.00593804
Gm01_48388245	0.526948	0.791854	-0.00221914	0.00641751	0.442679	0.709312	0.0016619	0.00609668	2.84811	0.772541	0.00560624	0.00625254	71.3181	0.728551	0.032046	0.00613449	102.151	0.795154	0.034215	0.00590837
Gm01_48402547	229.479	0.791777	-0.0328645	0.0064839	18.2313	0.709307	0.00783659	0.00578536	804.872	0.772265	0.0649092	0.00650002	216.258	0.728513	0.0363788	0.00634351	34.3687	0.795196	0.0137127	0.00652428
Gm01_48408553	0.00136007	0.791854	0.000110678	0.00639657	34.463	0.7093	-0.0144222	0.00586201	3.59486	0.772541	0.00616936	0.00654837	11.9937	0.728583	0.0128156	0.00578405	75.3136	0.795169	0.0287831	0.00624931
Gm01_48419598	13.0578	0.791848	0.0108054	0.00672885	41.0858	0.709298	0.0156876	0.00579294	0.363154	0.772543	-0.00195419	0.00643759	67.471	0.728554	0.030315	0.00583664	168.754	0.795121	0.0429352	0.00624906
Gm01_48424768	51.9673	0.79183	0.0213743	0.00655579	49.1361	0.709295	0.0170219	0.0057122	1.73705	0.772542	-0.00423397	0.00659649	61.9007	0.728557	0.0287087	0.00625713	609.378	0.794899	0.0808108	0.0065771
Gm01_48443171	1.4341	0.791853	-0.00351621	0.00618168	39.1187	0.709299	0.0150447	0.00572682	13.4803	0.772536	0.0116772	0.007295	56.7112	0.72856	0.0272084	0.00642003	400.547	0.795007	0.0648737	0.00565001
Gm01_48459384	6.67836	0.791851	0.00748334	0.00620976	2.53497	0.709311	-0.00378154	0.00557831	5.3652	0.77254	0.00725602	0.00724648	6.49523	0.728586	0.00904703	0.00614457	557.903	0.794932	0.0754132	0.00572501
Gm01_48468828	6826.32	0.790873	-0.0769363	0.00778375	578.055	0.709242	-0.0205902	0.00652735	8651.65	0.771302	0.0886655	0.0114355	1479.11	0.728383	-0.037791	0.00873834	1916.48	0.794917	0.0428146	0.0059386
Gm01_48517340	30.7253	0.791841	-0.0147131	0.00625454	0.105707	0.709312	-0.00071766	0.00550453	19.027	0.772535	0.0124186	0.00720481	350.246	0.728432	0.0593761	0.00633762	883.076	0.79481	0.0862863	0.00532523
Gm01_48539020	81.3807	0.791822	0.0228591	0.00625646	65.7269	0.709293	-0.0170786	0.00522736	118.507	0.772495	0.02944	0.00724671	42.2262	0.728571	-0.0194033	0.00591984	973.687	0.794791	0.0861085	0.00549949
Gm01_48649094	877.991	0.791652	0.0441065	0.00626435	43.2492	0.709304	-0.00843858	0.00553866	2180.74	0.772038	-0.0717454	0.00686906	161.074	0.728553	0.0203306	0.00568526	778.529	0.795018	0.0439145	0.00599628
Gm01_49107644	203.762	0.791821	0.0150796	0.00619984	205.731	0.709284	0.0137293	0.00554463	828.661	0.772406	-0.0314606	0.00699925	835.96	0.728453	0.0332315	0.00626473	468.654	0.795127	0.0242219	0.00556137
Gm01_49143494	725.763	0.791733	0.0290419	0.00656066	48.3626	0.709305	0.00678173	0.00545186	279.654	0.772496	-0.0187079	0.00559342	401.927	0.728522	0.0237037	0.00580665	9.03763	0.795206	0.00344211	0.00551113
Gm01_49287924	168.099	0.791818	-0.0180907	0.00653679	379.653	0.709248	0.0231982	0.00551479	166.056	0.772506	-0.0191827	0.00513265	85.2066	0.728569	-0.0153106	0.00553809	6.73496	0.795206	-0.00394357	0.00557209
Gm01_49315885	724.37	0.791699	-0.0372839	0.00692674	688.681	0.709197	0.0310257	0.00574991	46.9895	0.772532	0.0101303	0.00536491	279.211	0.728524	-0.0275014	0.00592872	21.8524	0.795203	-0.00705189	0.00538383
Gm01_49332605	632.965	0.791715	-0.0356982	0.00658086	488.911	0.709228	0.0267361	0.00543207	28.0789	0.772536	-0.00803981	0.00507198	158.532	0.728551	-0.021378	0.00620645	47.7602	0.795197	-0.0107008	0.00588707
Gm01_49340027	1411.26	0.791556	-0.0514056	0.00718618	1314.7	0.709093	0.0426597	0.0056959	1.61584	0.772543	0.00185405	0.00494869	550.842	0.728463	-0.038024	0.00681129	65.5235	0.795193	0.0120528	0.00604252
Gm01_49400367	397.04	0.791767	-0.0280426	0.00684346	861.913	0.709165	0.03524	0.0058339	42.8093	0.772533	0.00982452	0.00526091	1272.82	0.728288	-0.0596154	0.00680043	25.2344	0.795202	-0.00769956	0.00605401
Gm01_49411627	506.918	0.791742	-0.032041	0.0066533	1362.18	0.709077	0.0448406	0.00599893	5.21754	0.772542	0.00346843	0.00489448	1285.24	0.728281	-0.0605651	0.00723248	130.018	0.795177	-0.0176731	0.00634163
Gm01_49641478	0.216176	0.791854	0.000748525	0.00621061	631.833	0.709186	0.0354491	0.00590897	18.6246	0.772538	0.00730365	0.0049064	175.45	0.728544	0.0240823	0.0100634	748.063	0.795007	0.0473076	0.00750783
Gm01_49683093	31.2556	0.791846	0.00912702	0.00595763	112.866	0.709288	0.0159453	0.00585578	11.0672	0.77254	0.00574919	0.00490318	82.7613	0.728567	0.0171703	0.00756987	1.66397	0.795208	-0.00227738	0.00649898
Gm01_49699030	54.1931	0.79184	0.0120664	0.0061313	73.5114	0.709296	0.0129303	0.00584259	10.5903	0.77254	0.00564836	0.00501937	34.22	0.72858	0.0110963	0.00774722	4.97906	0.795207	-0.00395644	0.0069351
Gm01_49708343	25.4032	0.791847	0.00822244	0.0060711	62.112	0.709299	0.0118393	0.00592064	1.60838	0.772542	0.00218948	0.00509551	16.4211	0.728585	0.00763599	0.00823685	88.5756	0.795184	-0.0165988	0.00731047
Gm01_49735577	0.0792854	0.791854	0.000503173	0.00601363	594.419	0.709181	0.0380434	0.00601665	83.8783	0.772519	-0.0173089	0.00513746	773.643	0.728364	0.0570483	0.00908052	702.788	0.794998	0.051179	0.00800277
Gm01_49765591	92.0799	0.791836	-0.0116843	0.00604049	1571.33	0.70907	0.0431135	0.00614699	11.9639	0.772541	-0.00438138	0.00592954	142.878	0.728562	-0.0159869	0.00913857	1282.35	0.79495	-0.0464012	0.00919324
Gm01_49887345	281.146	0.791764	-0.0346873	0.00629903	150.745	0.709275	0.0215505	0.00585013	6.82911	0.772541	0.00578713	0.0055984	236.009	0.728507	0.037702	0.00753599	899.964	0.794893	0.0677785	0.00768467
Gm01_49906841	278.271	0.791764	-0.0347825	0.00597849	345.52	0.709226	0.0328567	0.00621593	1.67092	0.772542	-0.00288744	0.00579935	593.102	0.728381	0.0603666	0.00777713	1008.33	0.794852	0.072357	0.00768782
Gm01_49920815	1769.21	0.791337	-0.0795798	0.00643686	594.097	0.709177	-0.0391804	0.00632755	2299.29	0.771847	0.0963719	0.00671689	28.2026	0.72858	-0.0116736	0.00723044	74.7465	0.795184	-0.0177622	0.00703942
Gm01_49928390	1677.69	0.791373	-0.0760086	0.00620831	755.761	0.709142	0.0435597	0.00593837	1094.02	0.772218	0.0652431	0.00584283	148.06	0.728544	0.0262597	0.006838	459.157	0.795065	0.0431785	0.0068437
Gm01_49978110	1479.64	0.791378	-0.0801775	0.00649144	15.6365	0.709308	-0.00694578	0.00624354	1095.19	0.772174	0.0739808	0.00611862	0.0019591	0.728589	0.000110016	0.00630905	302.387	0.795101	-0.0396827	0.0080702
Gm01_50013092	1075.03	0.791459	-0.0779227	0.00654624	174.532	0.709263	0.0260198	0.00641717	213.743	0.772459	0.0379329	0.00560086	17.4716	0.728582	0.0124845	0.00605388	119.937	0.795159	0.0289491	0.00605304
Gm01_50023158	1557.63	0.791286	-0.0931184	0.00667178	121.352	0.709278	0.0215853	0.00625351	584.979	0.772316	0.0622629	0.0054205	14.911	0.728583	0.0114321	0.00639157	14.5143	0.795202	0.00999487	0.00630279
Gm01_50050678	972.265	0.791496	-0.0743193	0.0068926	311.105	0.709225	0.0348297	0.00602786	228.35	0.772453	0.0393997	0.00509312	122.603	0.728537	0.0333829	0.0063587	140.077	0.79515	0.0314323	0.00625195
Gm01_50059633	659.487	0.791608	-0.0619767	0.0064114	281.931	0.709233	0.0334175	0.00617441	109.557	0.772499	0.0276691	0.00505742	10.7625	0.728585	0.0100568	0.00637606	238.116	0.795109	0.0415396	0.0059317
Gm01_50089892	318.959	0.791747	-0.0387281	0.00614672	413.792	0.709206	-0.0367902	0.00654735	716.866	0.77229	0.0626357	0.00555151	98.8557	0.728552	-0.0261776	0.00704754	448.999	0.795042	-0.050561	0.00660954
Gm01_50100192	235.708	0.791767	-0.0365768	0.00653001	6.82263	0.70931	0.00513312	0.00577975	4.02798	0.772541	0.00523425	0.00499798	125.504	0.728535	0.0338611	0.006693	140.108	0.79515	0.0314376	0.0062085
Gm01_50120870	206.029	0.791777	-0.0344678	0.00639313	91.0396	0.709287	0.0188954	0.00573087	0.125334	0.772543	-0.000931041	0.00510914	77.9569	0.728555	0.0269339	0.00648038	173.307	0.795136	0.0352551	0.00656743
Gm01_50128257	332.868	0.79173	-0.0440591	0.00604739	59.6629	0.709295	0.0153724	0.00582603	5.19581	0.772541	0.00603436	0.00521727	89.3002	0.72855	0.0290722	0.00600638	85.4731	0.795172	0.024922	0.00648067
Gm01_50148745	46.1376	0.791837	-0.0159195	0.00623555	98.087	0.709285	0.0191843	0.00579899	49.6636	0.772524	-0.0180397	0.00501112	116.837	0.72854	0.0319219	0.00627032	345.134	0.795068	0.0484359	0.00660223
Gm01_50157263	105.62	0.791815	-0.0241137	0.00608562	59.1179	0.709296	0.0149113	0.00588387	20.8598	0.772535	-0.0117031	0.00509562	116.228	0.72854	0.0318605	0.00619758	464.796	0.79502	0.056262	0.00674143
Gm01_50171046	610.181	0.791643	-0.0552217	0.0064051	238.109	0.709249	0.02877	0.00604914	11.0722	0.772539	0.00808311	0.00507353	492.233	0.728396	0.061488	0.00718327	55.0511	0.795187	0.0183692	0.00681864
Gm01_50182355	62.2172	0.791835	-0.0152719	0.00650733	110.852	0.709286	-0.0172123	0.00620081	177.404	0.772488	0.0275681	0.00529095	0.482792	0.728589	0.00159028	0.00619857	354.199	0.795092	-0.0397588	0.00663844
Gm01_50213521	708.913	0.791681	-0.0420339	0.00643305	349.337	0.70924	0.027285	0.00626622	33.7749	0.772534	-0.00969306	0.00519212	0.0454248	0.728589	-0.000385094	0.00662518	10.5035	0.795205	-0.00552349	0.0062472
Gm01_50228409	688.632	0.791693	-0.0396431	0.00668815	53.0226	0.709302	-0.0101196	0.00574039	147.766	0.772507	0.019336	0.00512089	318.598	0.728512	-0.030583	0.00710824	1322.01	0.794875	-0.0590944	0.00705046
Gm01_50268510	877.962	0.791653	-0.0438825	0.00657352	321.007	0.70925	0.0244354	0.00646333	1.26007	0.772543	0.00174893	0.00546418	9.5105	0.728587	-0.00516498	0.00704655	37.7089	0.795199	-0.00978012	0.00663889
Gm01_50420411	958.742	0.791729	0.0260094	0.00603385	193.129	0.709293	-0.00987763	0.00578697	156.443	0.772522	-0.0110425	0.00547016	0.00250432	0.728589	-4.77839e-05	0.00783928	82.2266	0.795196	-0.00818355	0.00651825
Gm01_50435152	597.328	0.791777	0.020383	0.00609982	95.2558	0.709303	-0.00688308	0.00568957	161.933	0.772521	-0.0111559	0.00568761	224.03	0.728559	0.0141981	0.00777179	2.67232	0.795208	0.00146496	0.00665099
Gm01_50829317	2385.01	0.791564	0.0383628	0.00671264	8344.06	0.708502	-0.0625521	0.00705993	3247.63	0.772142	-0.0466531	0.0070712	7781.78	0.727626	0.077043	0.0121791	5334.08	0.794516	0.0611397	0.0084011
Gm01_50895975	3260.01	0.791464	0.044199	0.00542351	986.289	0.70922	-0.0205862	0.00540461	1587.37	0.772348	-0.0323985	0.00538602	3.69272	0.728589	-0.00168492	0.0087273	0.157181	0.795208	0.000329663	0.0066529
Gm01_50911939	1889.62	0.791621	0.0346442	0.00526403	1205.57	0.709193	-0.0242785	0.00542807	537.496	0.772476	-0.0192544	0.00503984	5346.11	0.727918	0.0647409	0.0117114	5445.86	0.794491	0.0626453	0.00761338
Gm01_51320976	13.0219	0.791852	0.00283739	0.00593983	77.8216	0.709305	0.00582668	0.00564628	183.158	0.77252	-0.0112573	0.00569317	1.95999	0.728589	0.00127224	0.00784677	1181.69	0.795052	0.0292067	0.00630582
Gm01_51329895	14.2631	0.791852	0.00319964	0.00512489	1671.04	0.709145	0.0288087	0.00542041	2008.84	0.772267	-0.0408886	0.00539286	11.6352	0.728588	-0.00353151	0.00835109	195.418	0.79518	-0.0130102	0.00676675
Gm01_51353906	20.943	0.791851	0.00387015	0.00519774	1703.73	0.709142	0.0290676	0.00529173	1680.84	0.772312	-0.0373319	0.00637411	1.6275	0.728589	-0.00131794	0.00807458	411.589	0.795149	-0.0188443	0.00671415
Gm01_51399673	77.9434	0.791844	0.00735175	0.0049317	2079.24	0.709107	0.0316398	0.00533626	1680.83	0.772316	-0.036701	0.00735814	150.303	0.728568	0.01241	0.0065047	279.726	0.795168	-0.0152753	0.00629885
Gm01_51446966	649.576	0.791767	-0.0221271	0.00503853	70.3512	0.709305	-0.00615476	0.0050005	25.3113	0.772539	0.00468133	0.00643056	439.831	0.728524	-0.0218984	0.00613453	985.866	0.795063	0.029805	0.00634462
Gm01_51453041	367.772	0.791805	-0.0165923	0.00482336	84.3839	0.709303	-0.00672026	0.00502392	11.2515	0.772541	0.0031089	0.00660752	670.267	0.72849	-0.0269006	0.00629514	1431.01	0.794998	0.0357662	0.00580853
Gm01_51512797	726.089	0.791793	-0.0146253	0.00489423	657.349	0.709269	-0.0118636	0.00489318	11092.3	0.771599	0.0595678	0.0107474	12.4683	0.728588	-0.00213837	0.00604372	576.306	0.795156	0.0139045	0.00555463
Gm01_52577638	132.202	0.791826	-0.0155498	0.00487661	21.3686	0.709309	-0.00506155	0.00520053	10.3982	0.772541	0.00479998	0.00598214	7.16978	0.728587	0.0046784	0.00538652	23.2681	0.795203	-0.00730864	0.00554073
Gm01_52638715	428.731	0.791765	-0.0276439	0.00468969	265.367	0.709271	-0.0176248	0.00545597	534.337	0.772425	0.0339219	0.00583824	128.955	0.728558	-0.0195118	0.00594574	189.09	0.795164	-0.0205447	0.0058096
Gm01_52644359	87.3647	0.791834	-0.0135671	0.00497625	5.80087	0.709311	-0.00280479	0.00508834	32.5746	0.772535	0.00920473	0.00565202	4.30745	0.728588	-0.00400949	0.0056967	220.76	0.795152	-0.0243669	0.00566732
Gm01_52661309	117.432	0.791828	-0.0156754	0.00505564	2.66433	0.709312	-0.00189475	0.00542138	41.8345	0.772533	0.0103928	0.00539996	5.3366	0.728588	0.00444378	0.0056777	262.907	0.795141	-0.0264935	0.00575939
Gm01_52673010	9.53159	0.791852	-0.00446394	0.00490634	3.2098	0.709312	-0.00207881	0.00544282	0.683648	0.772543	0.00132787	0.00555024	3.53742	0.728588	0.00361574	0.00557917	190.729	0.79516	-0.0225543	0.0059012
Gm01_52689270	66.0367	0.791839	-0.0117005	0.00511095	2.52279	0.709312	0.0018352	0.00534088	50.9306	0.772531	0.0114107	0.00510432	70.6438	0.72857	-0.0160798	0.00550434	264.104	0.795141	-0.0264239	0.00612148
Gm01_52699979	16.1845	0.79185	-0.00583663	0.00505525	1.15994	0.709312	-0.00125344	0.00586631	1.13956	0.772543	0.00172094	0.00528035	1.62245	0.728589	-0.00246034	0.00557833	161.108	0.795167	-0.0208077	0.00621643
Gm01_52711625	160.411	0.791818	-0.0183364	0.00543084	43.0911	0.709305	-0.00762905	0.00565801	140.444	0.772509	0.0190534	0.00519285	56.7513	0.728574	-0.0144934	0.00555224	248.917	0.795145	-0.0257957	0.00663364
Gm01_52728684	1.93038	0.791853	-0.00195941	0.00522313	29.3994	0.709307	-0.00615283	0.00555499	4.05644	0.772542	-0.00314369	0.00493214	5.84739	0.728588	0.00448413	0.00538492	567.661	0.795068	-0.0378263	0.00736177
Gm01_52745936	1.08463	0.791854	-0.00142557	0.00518481	7.97403	0.709311	-0.00312381	0.00542658	4.49891	0.772542	-0.0031977	0.00518326	66.3336	0.728573	-0.0144323	0.00556519	5.24392	0.795207	-0.00351382	0.00676777
Gm01_52953101	284.952	0.791817	0.0141546	0.00535306	1678.31	0.709144	-0.0290121	0.00561306	107.371	0.772529	0.00909532	0.0050629	164.343	0.728567	0.0120137	0.00560308	463.244	0.795144	0.0193196	0.00712458
Gm01_54415815	1399.31	0.791722	0.0228336	0.00520456	882.914	0.709246	0.0157546	0.0061643	476.028	0.772498	-0.0136409	0.00492836	303.258	0.728561	0.0112521	0.00536289	4147.12	0.794796	0.0412351	0.00921576
Gm01_55496822	189.237	0.791803	0.0239188	0.0054809	0.0780371	0.709312	0.000405598	0.00561348	178.411	0.772493	-0.0248015	0.00526094	42.8568	0.728577	-0.013373	0.00509946	434.508	0.79508	0.0395106	0.00672603
Gm01_55570976	405.514	0.791726	0.0409279	0.00518123	91.2364	0.709291	-0.015858	0.00547868	490.391	0.77238	-0.0488635	0.00536636	46.8807	0.728573	0.0171488	0.00533115	561.775	0.795012	0.053308	0.00649218
Gm01_55624404	423.022	0.791722	0.0414752	0.00525864	138.416	0.70928	-0.0193965	0.00537832	691.447	0.772315	-0.0575052	0.00553708	47.903	0.728572	0.0171462	0.00500948	1064.76	0.79484	0.0727338	0.00591035
Gm01_55651617	2.66329	0.791853	-0.00331184	0.00534505	240.652	0.709256	-0.0254848	0.00493385	5.92141	0.772541	-0.00539575	0.00567271	6.67384	0.728587	0.00658306	0.0053657	616.152	0.794992	0.0560539	0.0057585
Gm01_55664500	38.068	0.791842	-0.0127697	0.00526527	183.173	0.709269	-0.0226338	0.00536646	2.84927	0.772542	-0.00382562	0.00528821	1.78462	0.728589	-0.00349465	0.00500406	519.053	0.795022	0.0525762	0.0055718
Gm01_55672816	24.9592	0.791846	-0.0103162	0.00492032	133.395	0.709281	-0.0192742	0.00495172	6.09261	0.772541	-0.00558027	0.00513889	0.1038	0.728589	-0.000840369	0.00522125	521.662	0.795022	0.052578	0.00555732
Gm01_55692916	37.6951	0.791842	-0.0127539	0.00518812	164.086	0.709273	-0.0214863	0.00491364	9.27082	0.77254	0.00692782	0.00500053	107.99	0.728549	-0.0272996	0.0054353	322.454	0.795092	0.0416054	0.00590039
Gm01_55700872	121.258	0.791815	-0.0230708	0.00536535	80.5685	0.709293	-0.0151698	0.0053221	27.3536	0.772533	0.0120171	0.00501727	50.2653	0.72857	-0.0188553	0.00570145	242.806	0.79512	0.0364557	0.00618013
Gm01_55709687	187.188	0.791793	-0.0287091	0.00515032	19.848	0.709307	-0.00754113	0.00541426	55.3408	0.772524	0.0171157	0.00486553	3.65662	0.728588	0.00508847	0.00565265	176.398	0.795144	0.0311167	0.00725236
Gm01_55719252	0.692833	0.791853	0.00216349	0.00491898	242.146	0.709241	-0.0321332	0.00544629	6.29008	0.77254	-0.00728509	0.00500181	4.18189	0.728587	-0.00713039	0.00575958	554.984	0.794954	-0.0695392	0.00760003
Gm01_55726233	0.693929	0.791853	0.00220836	0.0052923	182.942	0.709258	-0.0284081	0.00533713	24.6964	0.772532	-0.0147732	0.00530192	15.5856	0.728581	0.0141929	0.00590301	249.336	0.795091	-0.0476944	0.00683277
Gm01_55731797	90.4531	0.791817	0.0250805	0.00529354	96.5839	0.709283	-0.0206061	0.00547185	91.0978	0.772502	-0.0281808	0.00516322	17.5573	0.72858	0.0149139	0.00567764	206.962	0.795112	-0.0431672	0.00699158
Gm01_55738248	19.0772	0.791846	0.0116918	0.00500891	187.728	0.709256	-0.0290239	0.00550377	19.7049	0.772534	-0.0133451	0.00531602	0.694899	0.728589	-0.00304118	0.0057384	332.467	0.795051	-0.0556848	0.0068046
Gm01_55766326	32.2215	0.79184	0.015275	0.00540821	127.424	0.709274	-0.0240187	0.00536705	24.6185	0.772532	-0.0150105	0.00514678	2.25409	0.728588	0.00552422	0.00552779	230.826	0.795098	-0.0466893	0.00668737
Gm01_55776600	24.5083	0.791844	0.0130894	0.00514283	94.785	0.709284	-0.0203905	0.00521711	24.4147	0.772532	-0.0146526	0.00508023	1.2319	0.728589	-0.00398306	0.00578724	224.033	0.795103	-0.0450982	0.00636908
Gm01_55783148	27.4706	0.791845	-0.0114202	0.00516603	648.563	0.709151	0.0446719	0.00588182	108.918	0.772504	0.0249696	0.00509124	8.25619	0.728586	0.00795885	0.0053741	58.5841	0.795186	0.018647	0.00784015
Gm01_55796676	10.9613	0.791849	0.00859004	0.00503336	167.953	0.709263	-0.0266937	0.00574137	10.1053	0.772538	-0.0092242	0.00472707	3.22642	0.728588	-0.0062691	0.00548575	571.58	0.794947	-0.0704918	0.00607395
Gm01_55804326	20.8413	0.791845	0.0121109	0.00529369	68.5906	0.709292	-0.0174009	0.00569778	1.373	0.772542	-0.00348722	0.00462269	4.33894	0.728587	0.00750538	0.00549346	290.457	0.795072	-0.0515308	0.00603256
Gm01_55816096	15.8816	0.791847	0.0106885	0.00532614	112.065	0.709278	-0.0224553	0.00543805	18.369	0.772535	-0.0129184	0.00478789	9.21347	0.728584	0.0111196	0.00543316	310.012	0.795061	-0.0539086	0.00609974
Gm01_55823137	18.2455	0.791846	0.0115044	0.00524574	97.8562	0.709283	-0.021063	0.00531382	14.0644	0.772536	-0.0113575	0.0046776	0.404101	0.728589	0.00234246	0.00542561	292.033	0.795069	-0.0525682	0.006061
Gm01_55832080	54.8779	0.791831	0.0195567	0.0051865	193.935	0.709255	-0.0291433	0.00539399	68.0543	0.772513	-0.0244082	0.00514919	53.8347	0.728562	-0.0262323	0.0053672	315.029	0.795061	-0.05336	0.00590603
Gm01_55844217	59.1852	0.791829	0.0206078	0.00522244	127.335	0.709274	-0.0239159	0.00538431	57.3028	0.772517	-0.0227787	0.00502023	6.00222	0.728586	0.00895175	0.00531119	253.899	0.795088	-0.0487101	0.00604763
Gm01_55868627	57.0907	0.79183	0.0202526	0.00546444	185.952	0.709256	-0.0289155	0.00565829	56.4045	0.772517	-0.0226161	0.0050685	18.6139	0.72858	0.0157795	0.00550139	219.31	0.795104	-0.0453044	0.00559514
Gm01_55880847	6.97752	0.791851	0.00704339	0.00564002	107.944	0.70928	-0.0219242	0.00556986	12.8016	0.772537	-0.0107127	0.00534702	0.00315263	0.728589	0.00020395	0.00565533	300.847	0.795066	-0.0527572	0.00559847
Gm01_55903043	13.5887	0.791848	0.00972118	0.00566921	84.6852	0.709287	-0.0192349	0.00546381	14.8364	0.772536	-0.0113854	0.00534731	61.9862	0.728558	-0.0281227	0.00580766	181.443	0.795123	-0.0404578	0.0060064
Gm02_180036	7311.4	0.791338	0.0390739	0.00816219	1076.89	0.709252	0.0129248	0.00576629	704.197	0.772492	0.0127523	0.00645614	710.301	0.728537	0.0139014	0.00598531	1528.22	0.795092	-0.0192002	0.00590477
Gm02_830849	228.5	0.791834	0.00865764	0.00780946	4.715	0.709312	-0.00105577	0.00533135	211.36	0.772524	-0.00873935	0.00600913	3888.46	0.72823	-0.0405744	0.00860865	1955.08	0.795022	-0.0271661	0.0067203
Gm02_918708	9856.13	0.79107	0.0511333	0.00723258	211.913	0.709299	-0.00645166	0.00543538	5058.4	0.772127	-0.0387935	0.00770374	7.87157	0.728589	0.00168548	0.00562003	992.085	0.795122	-0.017556	0.0071611
Gm02_2186670	6687.33	0.791215	0.0505766	0.00871847	4906.83	0.708941	0.0373503	0.00629842	8004.05	0.771772	-0.0572199	0.0110783	275.651	0.728563	0.0111826	0.00575927	49.066	0.795203	-0.00459076	0.00677044
Gm02_3058781	743.972	0.791787	0.0158849	0.00630301	3969.37	0.70903	0.031568	0.00633652	809.715	0.772469	-0.017304	0.00719684	289.467	0.728563	0.0110678	0.00554779	4520.22	0.794772	0.0417983	0.00913023
Gm02_3100048	720.509	0.791774	-0.0193356	0.00771404	3704.15	0.708986	-0.037792	0.00659468	6121.43	0.771855	0.0583738	0.0100599	487.86	0.728535	-0.0174267	0.00558462	364.178	0.795165	0.0145848	0.00670955
Gm02_3579235	233.653	0.791823	-0.0130052	0.00752658	6810.16	0.708599	-0.0609712	0.00776897	3194.99	0.772117	0.0499813	0.00918633	1454.46	0.728396	-0.0357491	0.00539792	5978.81	0.79437	0.0699256	0.00882502
Gm02_3843135	993.458	0.791697	0.0322002	0.00656255	3525.31	0.708891	0.0500489	0.00685004	310.427	0.772491	-0.0194696	0.00657659	5.1943	0.728588	0.00287161	0.00495248	115.582	0.795188	-0.0121121	0.00693759
Gm02_3907076	3039.92	0.791432	0.0495296	0.00578243	2667.69	0.709021	-0.039757	0.00690866	935.637	0.77241	-0.0288455	0.00653103	1.00097	0.728589	0.00101523	0.00514744	1077.39	0.795047	0.0316459	0.00654951
Gm02_3924607	652.306	0.791746	0.027246	0.00575997	2424.45	0.70901	0.0431952	0.00708601	152.033	0.772516	-0.014296	0.00565848	34.1142	0.728583	0.0078011	0.00532797	139.021	0.795183	-0.0139304	0.00639462
Gm02_3939357	159.467	0.791828	0.013228	0.00570105	2990.68	0.708946	0.0472025	0.00608519	3.46269	0.772542	-0.00211254	0.0052892	0.378051	0.728589	0.000799603	0.0056793	240.851	0.795165	-0.0179574	0.00550379
Gm02_3960728	239.153	0.791815	0.0164032	0.00586023	1575.54	0.709117	0.0347064	0.00619431	20.2232	0.772539	-0.00517131	0.00542345	275.666	0.728538	0.021883	0.00603768	48.802	0.795199	-0.00818785	0.00558168
Gm02_3977496	184.915	0.791823	0.0144709	0.00636652	1315.71	0.709148	0.0318218	0.00569269	29.6618	0.772538	0.00628415	0.00575895	33.0135	0.728583	0.00760096	0.00630831	86.2953	0.795192	-0.0109247	0.00541292
Gm02_3994073	449.302	0.791784	-0.0212726	0.00662551	8033.15	0.708345	0.0761456	0.00634797	1487.78	0.772306	0.0407968	0.00652965	1582.24	0.728332	-0.0456095	0.00645416	197.373	0.795175	-0.01519	0.00566179
Gm02_4098441	2313.9	0.791499	0.0478265	0.00676047	260.851	0.709281	0.0137228	0.00569393	2622.84	0.772131	-0.0534527	0.00706955	513.877	0.728507	-0.0254516	0.0063554	1979.62	0.79488	-0.0474833	0.00644491
Gm02_4273951	715.593	0.791725	-0.0310512	0.00659406	1825.77	0.709047	0.0438078	0.00580189	734.71	0.772406	0.0334758	0.00761687	1043.44	0.728388	-0.0440017	0.00679549	4.97097	0.795207	0.00281206	0.00567486
Gm02_4305591	1451.52	0.791586	-0.045518	0.00659709	1142.65	0.709141	0.0356611	0.00560416	1645.35	0.772227	0.0517492	0.00851553	980.188	0.728392	-0.0443745	0.00660605	8.37583	0.795206	0.00377023	0.00622503
Gm02_4329021	379.131	0.791786	-0.0223779	0.0059694	3476.44	0.708828	0.0579425	0.00557308	438.893	0.772461	-0.0257841	0.00782709	363.833	0.728518	0.0262786	0.00662883	68.2294	0.795195	-0.0103747	0.00584103
Gm02_4376350	471.195	0.79177	-0.0249837	0.00625213	4306.36	0.708711	0.0646105	0.00564059	607.115	0.77243	-0.0303508	0.00844544	235.5	0.728543	0.0211347	0.0068932	31.5036	0.795202	-0.00705636	0.00610044
Gm02_4394769	464.005	0.791771	-0.0248865	0.00645805	4424.54	0.708692	0.0657238	0.00557712	393.199	0.77247	-0.0245302	0.00867677	128.073	0.728564	0.0156664	0.0062277	1.80245	0.795208	-0.00169495	0.00587314
Gm02_4657002	2406.37	0.791393	-0.0608333	0.00704542	597.796	0.709216	0.0278187	0.00560117	3007.23	0.771947	0.0722038	0.00970259	4.79837	0.728588	-0.00316365	0.00717953	13.7924	0.795205	-0.00499772	0.00602715
Gm02_4704508	503.709	0.791749	-0.0303202	0.00651146	242.407	0.709273	0.017925	0.00562719	518.671	0.77243	0.0328584	0.00793028	1521.17	0.728243	0.0625311	0.006377	1.66166	0.795208	0.00189863	0.00644318
Gm02_4802362	805.029	0.791684	-0.03872	0.0068418	352.548	0.709254	0.0217967	0.00552248	575.935	0.772416	0.0349824	0.00764908	887.996	0.728385	0.0483087	0.00630922	63.5076	0.795193	-0.0118587	0.00659689
Gm02_4820233	900.016	0.791667	-0.0403261	0.00726131	467.11	0.709236	0.0247438	0.00582976	752.134	0.77238	0.0392973	0.00759955	345.285	0.728511	0.029498	0.00622256	9.95012	0.795206	-0.00461532	0.0069745
Gm02_4899879	1292.32	0.79159	-0.0474351	0.00808492	372.076	0.709252	0.0218228	0.0058377	2018.18	0.77212	0.0624252	0.00818706	1273.12	0.728318	0.0536662	0.00625254	696.893	0.795054	0.0375055	0.00721752
Gm02_4925597	1528.99	0.791502	0.0582493	0.00822033	271.472	0.709263	0.0208357	0.00575109	279.757	0.772477	-0.0262417	0.00755196	892.299	0.728374	0.0507222	0.0064707	1913.3	0.794733	0.0701072	0.00695559
Gm02_4971543	320.999	0.791778	0.0273979	0.0070194	582.889	0.709205	0.0312044	0.00634224	1.96708	0.772542	-0.00226402	0.00691736	834.378	0.728381	0.0507317	0.00709262	1980.17	0.794702	0.0733552	0.00772923
Gm02_4994523	229.028	0.791799	0.0234508	0.00672315	753.915	0.709172	0.0359937	0.00662182	23.5155	0.772537	-0.0079318	0.00749889	728.589	0.728405	0.0480292	0.00705732	2175.18	0.794645	0.0778979	0.00766735
Gm02_5035934	276.828	0.791784	0.0271706	0.00676338	302.043	0.709253	0.0239991	0.00656645	108.284	0.772515	-0.01792	0.00760066	5247.38	0.727205	0.134931	0.00935838	3589.96	0.79423	0.105323	0.0087255
Gm02_5202358	2772.64	0.791398	-0.0560267	0.00769041	2364.6	0.70897	-0.0495947	0.00929277	7187.77	0.77135	0.0935232	0.00989654	950.25	0.728433	-0.0358448	0.00792254	8.54542	0.795207	0.00330546	0.0104239
Gm02_5226992	1878.48	0.791351	0.075195	0.00801363	1333.35	0.709035	0.0535731	0.00637873	761.329	0.772333	-0.0505439	0.0087593	112.989	0.728557	-0.0211443	0.00694072	588.636	0.795037	0.0454188	0.00702752
Gm02_5261478	440.848	0.791745	0.0335538	0.00776739	758.717	0.709166	0.0373426	0.0064658	872.064	0.772322	-0.0495731	0.00889275	204.286	0.728537	-0.0258449	0.00658939	22.5461	0.795202	0.0081511	0.00627941
Gm02_5299205	4174.46	0.791218	-0.0637337	0.0140488	87.3223	0.709302	-0.00790198	0.00633076	4031.03	0.771923	0.0648805	0.0133521	1445.8	0.728369	-0.0409199	0.0065415	353.327	0.795151	-0.0196763	0.00560197
Gm02_5360523	798.681	0.791593	0.0598602	0.0076173	2.80998	0.709311	-0.00295082	0.00563057	445.026	0.772391	-0.0478443	0.00845179	20.1784	0.728582	0.0113491	0.00623575	5.67063	0.795206	-0.00551274	0.00535005
Gm02_5410965	838.199	0.791569	0.0637982	0.00750752	73.0545	0.709293	-0.0155892	0.00556091	329.323	0.772425	-0.0429797	0.00735381	60.037	0.728567	0.0205956	0.00591786	139.74	0.795156	-0.0285644	0.00552877
Gm02_5430403	855.28	0.791566	0.063726	0.00669249	150.091	0.709274	-0.0221125	0.00541336	246.949	0.772456	-0.0367645	0.00731023	125.45	0.728543	0.0293433	0.00644062	58.339	0.795186	-0.0182332	0.00569011
Gm02_5444809	1284.31	0.79143	0.0766489	0.00615945	24.2939	0.709306	-0.00874651	0.0052959	319.039	0.772433	-0.0409418	0.00668765	26.3476	0.72858	0.0131233	0.00611404	102.253	0.795171	-0.0236552	0.00570485
Gm02_5467310	461.739	0.791695	0.0478752	0.00592922	4.10848	0.709311	-0.00374122	0.00531643	114.936	0.772501	-0.0256341	0.00678446	52.5246	0.728569	-0.0193767	0.00662868	47.655	0.79519	0.0168421	0.00611936
Gm02_5496879	120.839	0.791813	0.0241846	0.00567633	220.883	0.709255	-0.0271602	0.00542088	0.020064	0.772543	0.000333611	0.00735047	299.344	0.728478	-0.0453376	0.00712149	261.377	0.795111	-0.0388553	0.00558314
Gm02_5529675	168.352	0.791798	0.0277225	0.00557393	218.42	0.709257	-0.0262681	0.00559876	3.42228	0.772542	-0.00421435	0.00731407	208.072	0.728515	-0.0362601	0.0068135	234.417	0.795123	-0.0356066	0.00576071
Gm02_5565439	192.962	0.79179	0.0295573	0.00564864	211.468	0.709259	-0.0259469	0.0053265	133.078	0.772497	-0.0261336	0.00707363	724.863	0.728333	-0.067089	0.00740645	239.241	0.795122	-0.0357776	0.00559111
Gm02_5591380	2422.59	0.791547	0.0403155	0.00801468	875.707	0.709225	0.0208605	0.00597081	1735.29	0.772322	-0.0352206	0.0124598	866.228	0.72848	0.0260718	0.00995315	52.4452	0.795201	-0.00627116	0.00598343
Gm02_5620490	386.19	0.79172	0.0439201	0.00608637	825.621	0.709093	-0.0536611	0.0052124	172.603	0.772481	-0.0313017	0.0072353	23.8647	0.72858	-0.0128376	0.00708183	261.471	0.795109	0.039333	0.00574312
Gm02_5653303	1.33395	0.791853	0.00265272	0.00622484	1619.26	0.708873	-0.07702	0.00538177	0.00284223	0.772543	-0.000130912	0.00815146	57.5093	0.728567	-0.0206646	0.00706386	219.407	0.795123	0.0371214	0.00559788
Gm02_5694643	0.165243	0.791854	-0.000928653	0.00660076	1126.12	0.709008	-0.0638838	0.00540653	44.8566	0.772526	0.0163617	0.00800698	175.623	0.728522	-0.035954	0.0069187	216.823	0.795124	0.0367125	0.00556729
Gm02_5744953	22.9882	0.791846	-0.0110436	0.00691212	1079.81	0.709018	-0.0630704	0.00512913	46.2876	0.772526	0.0167673	0.00816196	47.5063	0.728571	-0.0188872	0.00634188	310.783	0.795087	0.0443367	0.00552253
Gm02_5799115	4369.82	0.791124	-0.0715325	0.00884076	1029.99	0.709177	-0.0297395	0.00530776	4590.46	0.771768	0.0759722	0.0102236	650.198	0.72848	-0.0301225	0.00650382	150.071	0.795181	0.0140741	0.00566909
Gm02_5813352	364.138	0.791728	-0.0427794	0.00692427	68.3806	0.709294	-0.015514	0.00568723	337.87	0.772421	0.0440074	0.00816847	7.2741	0.728586	-0.00715387	0.00642669	728.517	0.794932	0.0659518	0.00602754
Gm02_5833846	171.874	0.791793	-0.0298732	0.00672554	378.398	0.70921	-0.036956	0.00538977	463.407	0.772373	0.0524678	0.00808413	21.8243	0.728581	-0.0126623	0.00606902	289.015	0.795096	0.0422933	0.00573091
Gm02_5850082	33.9919	0.791842	-0.0129001	0.0067313	349.981	0.709221	-0.0344282	0.00517294	224.62	0.772463	0.0353675	0.00807103	1.62268	0.728589	-0.00332303	0.00665165	143.832	0.795154	0.0288942	0.0061542
Gm02_5930130	226.055	0.791783	-0.030547	0.00638808	519.002	0.709187	-0.0387884	0.00548593	27.439	0.772534	0.0112715	0.0082221	619.255	0.728383	-0.0583265	0.00669584	29.8613	0.795198	-0.0120126	0.00712573
Gm02_5946680	204.474	0.791785	-0.0312292	0.00634897	567.835	0.709166	-0.0433309	0.00558955	661.23	0.772311	0.0598197	0.00770639	0.000718389	0.728589	-6.87893e-05	0.00656519	918.21	0.79487	0.0719647	0.00703654
Gm02_6011261	459.091	0.791704	-0.0451567	0.0063525	58.0971	0.709298	-0.0134369	0.00548958	1471.59	0.772047	0.0857597	0.00782665	6.14909	0.728587	0.00607126	0.00652452	189.461	0.795141	0.0314477	0.00674524
Gm02_6027712	792.487	0.791624	-0.0527952	0.00617096	218.291	0.709263	-0.0233063	0.00570551	1433.43	0.772117	0.0746667	0.00766277	13.3598	0.728585	-0.00775025	0.00660289	54.1762	0.795191	-0.0148466	0.00659817
Gm02_6049837	736.767	0.791626	-0.0542169	0.00613719	180.661	0.709269	-0.0224715	0.0055609	449.159	0.772399	0.0449375	0.00734994	298.264	0.728491	-0.0401187	0.00661632	723.889	0.794965	-0.0582608	0.00720612
Gm02_6078108	1054.81	0.791525	-0.06556	0.00649628	140.247	0.709279	-0.0199986	0.00556343	909.562	0.772249	0.0646815	0.007485	438.82	0.728443	-0.0493062	0.00635209	380.212	0.795079	-0.0427188	0.00666532
Gm02_6148670	774.182	0.791623	-0.0536996	0.00641578	142.958	0.709279	0.0192789	0.00555473	1433.53	0.772101	0.077526	0.00728302	2189.35	0.727894	-0.104828	0.00709606	74.9896	0.795184	-0.0181205	0.00658896
Gm02_6197954	501.552	0.791703	-0.0434572	0.0061439	5.02019	0.709311	-0.00360485	0.00556039	233.523	0.77247	0.0317633	0.00711295	2063.83	0.727912	-0.105236	0.00680218	9.1016	0.795205	-0.00639975	0.00619835
Gm02_6251416	270.966	0.79177	-0.0328612	0.00594903	18.9664	0.709308	0.00719243	0.00567149	364.574	0.772425	0.0409767	0.00714455	1705.98	0.728006	-0.0995674	0.0068066	25.5929	0.795199	-0.0110768	0.00662057
Gm02_6286649	984.634	0.791565	-0.0596605	0.00616518	27.4692	0.709306	0.00828194	0.00647377	573.363	0.772367	0.0487826	0.00738639	1790.58	0.728012	-0.0962047	0.00663383	17.1055	0.795202	-0.0086001	0.00621509
Gm02_6329924	443.661	0.791717	-0.0420472	0.0058434	20.5338	0.709307	0.00748017	0.00652873	374.955	0.772422	0.0415767	0.00733788	1084.33	0.728218	-0.0795294	0.00652795	74.1945	0.795183	-0.0188681	0.00653706
Gm02_6357453	218.429	0.791787	-0.0290894	0.00587926	154.232	0.709277	0.0202265	0.00681327	325.006	0.772439	0.0381559	0.00744761	903.277	0.728284	-0.0715365	0.00658749	305.652	0.795106	-0.0377456	0.00665332
Gm02_6396340	3324.5	0.79136	-0.0555209	0.00595741	4989.07	0.708725	-0.0585945	0.0101365	5967.37	0.771649	0.0769028	0.00823722	6.71326	0.728588	-0.00271018	0.00694604	559.926	0.795119	-0.0241415	0.00741534
Gm02_6416950	350.886	0.791747	-0.0368992	0.00582838	88.3173	0.709292	0.0154	0.00675965	1050.46	0.772209	0.0683145	0.0079413	2.00904	0.728589	-0.00332882	0.00687781	19.2764	0.795202	0.00944825	0.00709523
Gm02_6435496	99.6008	0.791823	-0.0199581	0.00597531	48.8258	0.709301	0.0116057	0.00661041	914.75	0.772247	0.0649282	0.00806316	373.462	0.728462	-0.0465314	0.00687323	0.123255	0.795208	0.000769209	0.00657793
Gm02_6455703	33.1637	0.791844	-0.0112267	0.00549314	150.699	0.709277	0.019977	0.00621328	623.012	0.772347	0.0521233	0.00777747	31.7114	0.728579	-0.0131352	0.00681532	10.0901	0.795205	0.00677057	0.00622956
Gm02_6472987	7.62457e-05	0.791854	-1.66914e-05	0.00567978	40.5775	0.709303	0.0102112	0.00563876	177.782	0.772488	0.0272584	0.00712931	301.132	0.728492	0.0394819	0.00693442	151.813	0.795159	0.0257082	0.00627296
Gm02_6496009	1.77584	0.791853	-0.0022837	0.0050996	698.44	0.70917	0.0379583	0.00589068	5.96724	0.772541	-0.00445824	0.00698044	247.569	0.728518	-0.0317065	0.00648753	1.00536	0.795208	-0.00186839	0.0064934
Gm02_6529620	6.2468	0.791852	0.00406112	0.00530465	475.255	0.70922	0.0297816	0.00588486	33.7425	0.772534	-0.0100081	0.00667389	295.19	0.72851	-0.0324149	0.00616935	60.7203	0.795191	-0.0137131	0.00656211
Gm02_6564291	30.5106	0.791846	0.00925297	0.00502055	55.3897	0.709301	0.0105436	0.00589902	3.55832	0.772542	-0.00333961	0.00656611	556.248	0.728437	0.0454196	0.00569165	149.008	0.795166	0.0220802	0.0071262
Gm02_6952838	1606.74	0.791651	-0.032724	0.00540155	918.225	0.709222	0.0210197	0.00632255	1298.43	0.772375	0.030913	0.00659353	1.0481	0.728589	-0.000953252	0.00554934	168.967	0.795185	0.0114009	0.0062229
Gm02_6984267	1948.69	0.791607	-0.0361672	0.0056938	732.774	0.70924	0.0188436	0.00634252	1185.32	0.772389	0.0296652	0.00720242	117.417	0.728574	-0.0101547	0.00569341	0.045106	0.795208	0.000187079	0.00638291
Gm02_7026446	84.485	0.791841	-0.00924071	0.00638267	346.969	0.70927	-0.0161238	0.00682687	385.926	0.772482	-0.0204349	0.00755138	117.622	0.728571	-0.0118423	0.00578599	2161.72	0.794851	-0.0494934	0.00702501
Gm02_7112521	10437.8	0.790478	-0.0873068	0.00756007	10045.1	0.708259	-0.0741469	0.00948735	8491.95	0.771411	0.0815833	0.0092095	13.4479	0.728587	0.00342548	0.00588559	914.621	0.795079	-0.0274421	0.00603884
Gm02_7279747	346.608	0.791803	-0.0177853	0.00732213	3018.71	0.708965	0.0445629	0.00809066	362.664	0.772488	0.0191218	0.0087305	164.847	0.728564	0.0139603	0.00624299	1021.96	0.795045	-0.032807	0.0061405
Gm02_7350881	930.736	0.791708	-0.0309347	0.00731599	795.082	0.709215	0.0242815	0.00737596	419.462	0.772475	0.0218534	0.00865261	16.0272	0.728587	0.00463147	0.00601191	288.716	0.795159	-0.0185317	0.0060255
Gm02_7439248	14435.6	0.789941	-0.10331	0.011201	9726.52	0.708266	-0.074852	0.00754849	22602.8	0.769514	0.134222	0.0140411	84.4178	0.728578	0.00872797	0.00672258	315.33	0.795163	0.0162848	0.00644862
Gm02_7839398	290.081	0.791782	0.0271584	0.00748378	67.0768	0.709299	0.0109217	0.00678529	1074.07	0.772266	-0.0561319	0.00948092	0.182169	0.728589	-0.000820374	0.00614505	130.185	0.795173	-0.0199427	0.00545648
Gm02_7897473	20.7382	0.79185	-0.00589671	0.00705196	1016.53	0.70915	-0.0358546	0.00680357	27.9489	0.772537	0.00733918	0.00803579	1477.83	0.728264	-0.059664	0.00776486	102.406	0.795186	0.0143338	0.00544138
Gm02_7925967	179.536	0.79182	-0.0160782	0.0064124	430.892	0.709248	-0.021855	0.00637099	1264.34	0.772299	0.0454938	0.00775932	4672.8	0.727651	-0.096849	0.00905033	55.4446	0.795197	-0.00972835	0.00581103
Gm02_7977682	2.22734	0.791853	-0.00185004	0.00588829	852.816	0.709182	-0.0314904	0.00661929	57.3153	0.772531	0.0100202	0.0068107	1116.41	0.728357	-0.0491001	0.0084173	156.691	0.795175	0.0169109	0.00564527
Gm02_8067031	125.474	0.791824	-0.0169494	0.00588273	3299.57	0.708718	0.0729182	0.00654472	720.308	0.772367	-0.0434384	0.00684403	1771.63	0.728137	0.075741	0.00971223	106.172	0.795181	0.0170234	0.00574434
Gm02_8082377	24.93	0.791848	-0.00771101	0.00556483	2996.53	0.708763	0.0708144	0.00708129	830.286	0.772336	-0.0476789	0.00618385	1252.4	0.728261	0.065437	0.00811027	26.3582	0.795201	0.00867071	0.00575669
Gm02_8120391	616.802	0.791733	-0.0315145	0.00635653	68.9949	0.709301	0.00918962	0.00597724	148.834	0.772513	0.016513	0.00577582	24.3826	0.728584	-0.00740749	0.00715455	694.824	0.795059	0.0364169	0.00589239
Gm02_8155071	1112.42	0.791636	-0.0422236	0.00683582	99.4641	0.709297	0.0110152	0.00553459	276.392	0.772487	0.02245	0.00639515	102.165	0.728568	-0.0151247	0.00682912	609.729	0.795078	0.0340363	0.00642521
Gm02_8179402	69.2518	0.791836	0.013546	0.00613354	5.63771	0.709311	0.00321837	0.00585449	829.736	0.772323	-0.050658	0.00589372	73.2547	0.728568	0.0171222	0.00616223	0.895663	0.795208	-0.00169744	0.00643473
Gm02_8227995	82.6679	0.791833	0.0148477	0.00632531	7.61772	0.709311	-0.00375318	0.00523254	673.376	0.772364	-0.0458003	0.00644802	11.049	0.728586	0.00667861	0.0058997	11.6051	0.795205	-0.00613155	0.00637114
Gm02_8253391	152.024	0.791815	0.0202121	0.00580419	0.831194	0.709312	0.00124389	0.00520981	872.152	0.77231	-0.0523489	0.00706641	42.7726	0.728577	0.0132119	0.00571037	17.9599	0.795203	-0.00766086	0.00739185
Gm02_8288592	239.661	0.791793	0.0253643	0.00559956	23.2525	0.709308	0.00657933	0.00557359	950.713	0.772289	-0.0545951	0.00693274	78.3086	0.728567	0.0178346	0.0059006	0.0988946	0.795208	0.000567895	0.00706681
Gm02_8373589	75.0599	0.791836	0.0134957	0.00535007	159.3	0.709283	0.0164269	0.00616705	879.715	0.772321	-0.0496527	0.00719796	232.518	0.728527	0.0287241	0.00582961	20.5577	0.795203	-0.00774504	0.00710716
Gm02_8398668	2208.9	0.79159	-0.0363186	0.00610624	5987.5	0.708735	-0.0525646	0.00609342	7097.41	0.771687	0.0674705	0.0129025	1273.08	0.728437	-0.0301616	0.00700206	4260.01	0.794666	0.0535224	0.0128433
Gm02_9601063	0.0944893	0.791854	-0.000276292	0.00537723	6025.29	0.70864	-0.061054	0.00638737	101.939	0.772529	-0.00935755	0.00696148	138.754	0.72857	-0.0113829	0.00609484	45.7516	0.795201	-0.00641984	0.00693902
Gm02_10102169	4.98882	0.791853	0.00303273	0.00556802	3412.01	0.708758	-0.0669668	0.00742239	25.2258	0.772537	-0.00721212	0.00683984	275.488	0.728528	-0.0260177	0.00567753	2.14097	0.795208	0.00214662	0.00705058
Gm02_10153027	0.238506	0.791854	-0.000703232	0.00536949	3103.33	0.708779	-0.0674663	0.00648295	23.1583	0.772538	0.00736527	0.00620417	28.1193	0.728582	-0.00894538	0.00600761	1.89862	0.795208	0.00215357	0.00652073
Gm02_10181456	4.33759	0.791853	0.00343531	0.00525755	2658.01	0.708794	-0.0709495	0.00644419	9.86013	0.77254	0.00555948	0.00545724	565.296	0.72843	0.0472648	0.00680757	5.06537	0.795207	-0.00406537	0.00635991
Gm02_10205127	541.529	0.791737	0.0325302	0.00565942	70.4404	0.7093	-0.0098854	0.0068601	358.243	0.772463	-0.0279974	0.00567527	17.1613	0.728585	-0.00669527	0.00588354	521.793	0.795086	-0.0345179	0.00630069
Gm02_10219980	32.8397	0.791845	0.00946561	0.0052613	2489.31	0.708825	-0.0688403	0.00659355	7.65273	0.772541	0.00490678	0.0056404	422.627	0.72847	0.0409793	0.00597915	11.7507	0.795205	0.00620301	0.00580081
Gm02_10235192	180.098	0.791812	-0.0201057	0.00587783	68.9141	0.7093	-0.0105539	0.00674178	484.34	0.772428	0.0347687	0.00596705	266.324	0.728524	-0.0279837	0.00598579	13.2613	0.795205	-0.00588027	0.00586189
Gm02_10266340	265.386	0.791791	0.0248235	0.00539579	12.3011	0.70931	0.0044645	0.00660514	2.60902	0.772542	0.0026279	0.00608928	353.57	0.728498	-0.0340645	0.00627002	34.5174	0.795199	0.00975649	0.00585699
Gm02_10287548	85.7336	0.791831	0.0157776	0.00567056	3468.59	0.708616	-0.0833789	0.0076944	10.8029	0.77254	0.00601215	0.00572007	513.06	0.72844	0.0464586	0.00632859	1.68125	0.795208	0.00241982	0.00569556
Gm02_10334965	49.9065	0.791842	0.0109414	0.00564138	161.004	0.709283	0.0164011	0.00656077	149.428	0.772506	0.0201923	0.00579883	935.425	0.728346	-0.0561015	0.0059895	27.8387	0.795201	0.00889745	0.00569319
Gm02_10358223	106.7	0.791828	0.0158679	0.00614613	184.629	0.709278	0.0174593	0.00645994	262.151	0.772478	0.0264891	0.00565657	1957.76	0.728087	-0.0801112	0.00627925	9.72989	0.795205	-0.00521068	0.00557893
Gm02_10540701	625.326	0.791685	-0.0436627	0.00665742	915.156	0.709122	0.0443593	0.00644165	458.618	0.772415	0.0397059	0.00578176	41.1395	0.728577	-0.0130501	0.00581893	103.784	0.795178	0.0192936	0.0054486
Gm02_10632293	535.054	0.791712	-0.0397192	0.00598074	1999.31	0.708902	0.0646686	0.00663467	902.519	0.772295	0.0547332	0.00576509	710.647	0.728388	-0.0532428	0.00552386	124.997	0.795172	-0.0208103	0.00571822
Gm02_10694271	370.514	0.791751	0.0345537	0.00655411	1207.04	0.709056	-0.0519476	0.00735934	3.34391	0.772542	-0.00350588	0.00519756	10.1816	0.728586	0.00676583	0.00579912	0.261801	0.795208	0.00100139	0.00547442
Gm02_10725925	393.91	0.79174	-0.0372485	0.0055662	801.216	0.709134	0.0443515	0.00686214	426.734	0.772414	0.0414407	0.00515526	219.084	0.72852	-0.0330073	0.00578841	20.7495	0.795201	-0.00932847	0.00547129
Gm02_10758063	357.266	0.791748	-0.0360818	0.00629613	1370.77	0.709002	0.0590096	0.00741726	120.606	0.772506	0.0224226	0.005113	43.5167	0.728575	-0.0149815	0.00544356	19.5752	0.795202	0.00922025	0.005616
Gm02_10776761	213.992	0.791785	-0.0305925	0.00573455	2166.04	0.708781	-0.0804284	0.00715431	86.0684	0.772514	0.0209668	0.00524265	541.679	0.728393	0.0594451	0.00606776	0.0810004	0.795208	0.000655906	0.00564589
Gm02_10791907	672.867	0.791665	0.0472301	0.00616936	1332.64	0.709026	-0.0553489	0.00754451	228.148	0.772476	-0.0293907	0.00567203	15.1194	0.728585	0.00837687	0.0053829	187.508	0.79515	0.0271984	0.00592565
Gm02_10851551	0.780623	0.791854	-0.00175865	0.00561218	1773.24	0.708898	-0.069349	0.00735073	2.35754	0.772542	0.00328736	0.00528151	49.4064	0.728572	0.0168597	0.00580728	121.029	0.795167	0.0240271	0.00590919
Gm02_10869096	26.0124	0.791845	-0.0108658	0.00562376	1531.21	0.708931	-0.0686213	0.00710258	0.00995423	0.772543	-0.00023027	0.00532951	684.244	0.728335	0.0685681	0.00587237	6.11927	0.795206	0.00582034	0.00561135
Gm02_10915211	234.611	0.791786	0.028615	0.00552618	392.912	0.709225	0.0309216	0.0088812	251.088	0.772467	-0.031603	0.005166	1.36169	0.728589	0.00257961	0.00599485	22.4583	0.795201	-0.0096491	0.00554068
Gm02_10952752	59.97	0.791834	0.0166463	0.00557208	3737.38	0.708378	-0.107842	0.00765969	54.7203	0.772524	-0.0172829	0.00534355	855.729	0.728265	0.0781823	0.00572675	157.694	0.79515	-0.0298988	0.00567814
Gm02_10973353	9.19558	0.791851	0.00575594	0.00536236	408.761	0.70922	0.0320089	0.00736638	0.346395	0.772543	0.0011926	0.00549376	3.65893	0.728588	0.00429353	0.00572279	61.4093	0.795188	-0.0162092	0.0061445
Gm02_10989772	8.33435	0.791851	0.00622633	0.00518665	3720.3	0.70838	-0.107833	0.00833343	24.345	0.772534	-0.0115639	0.0054213	894.981	0.728249	0.0801627	0.00575658	259.068	0.795112	-0.0384406	0.00591902
Gm02_11072779	33.7908	0.791843	-0.0124704	0.00550003	4685.59	0.708146	-0.120307	0.0078248	60.8422	0.772522	0.0181849	0.00547436	415.191	0.728432	0.054334	0.00558268	748.236	0.794932	-0.0649708	0.00589965
Gm02_11090560	1.34557	0.791853	-0.00214864	0.00531428	1034.7	0.709084	0.0499327	0.0089505	2.44409	0.772542	-0.00308571	0.00580536	2.36711	0.728588	-0.00335214	0.00572918	310.673	0.795111	-0.0355156	0.00611554
Gm02_11139774	48.7932	0.791838	-0.0142819	0.00531827	3339.83	0.708514	-0.0974696	0.00771628	0.185575	0.772543	0.000954042	0.00546785	742.479	0.728324	0.0686151	0.00536608	451.26	0.79505	-0.0479508	0.00618801
Gm02_11178406	96.648	0.791824	-0.0193697	0.00531843	2156.44	0.708812	-0.0759024	0.0076941	21.9314	0.772536	-0.00997218	0.00532237	546.712	0.728402	0.0564122	0.00547025	580.68	0.795013	-0.0523084	0.00629901
Gm02_11210862	29.8708	0.791845	-0.0106959	0.00553032	1647.87	0.708932	-0.0660131	0.00780406	75.6446	0.772519	-0.0183875	0.00577257	601.456	0.728385	0.0587037	0.0053944	805.025	0.794939	-0.0611464	0.00672562
Gm02_11243759	48.2696	0.791841	0.0118355	0.005603	463.296	0.709218	-0.0308046	0.00762994	186.858	0.772492	-0.0248036	0.00581412	176.707	0.728539	0.0265812	0.00547731	2350.41	0.794534	-0.0897502	0.00771681
Gm02_11378219	320.972	0.791776	-0.0282261	0.00583962	2251.24	0.708886	0.0633801	0.00937471	110.715	0.772515	0.0174812	0.00679799	414.725	0.728483	0.0366637	0.00564049	13.3649	0.795204	0.00620738	0.00778684
Gm02_11421379	0.215816	0.791854	-0.000811604	0.00568013	1228.87	0.709058	-0.0510338	0.00765233	121.513	0.772509	-0.0206141	0.00632082	296.112	0.728502	0.0358475	0.00620966	359.827	0.795101	-0.0361988	0.00708743
Gm02_11464884	193.152	0.791808	0.0214957	0.00618636	1034.74	0.70912	-0.0421262	0.00873851	305.755	0.772468	-0.0286099	0.00742698	17.7039	0.728585	0.00749733	0.00679911	2385.09	0.79459	-0.0815843	0.00777632
Gm02_11510602	264.072	0.791791	-0.0250679	0.00579981	2196.86	0.708903	0.0615221	0.00683457	268.686	0.772477	0.0266103	0.00633389	7.12685	0.728587	-0.00468093	0.00619438	66.5185	0.795191	-0.0135347	0.00672898
Gm02_11535155	1286.71	0.791641	-0.0383835	0.00655224	11365.1	0.707848	0.0970032	0.0094601	1950.52	0.772214	0.0494552	0.00708996	3149.02	0.728054	-0.0672294	0.00775097	225.155	0.795168	-0.0171899	0.00641092
Gm02_11625055	309.065	0.791799	-0.0203342	0.00607769	156.411	0.70929	-0.0123151	0.00689852	851.448	0.772387	0.0354733	0.00636385	2356.39	0.728151	-0.0636555	0.00651419	90.7111	0.795191	-0.0118383	0.00650721
Gm02_11721464	611.586	0.791739	-0.0299446	0.00652974	2014.77	0.709019	0.0459848	0.00676765	1546.19	0.772244	0.05039	0.00647611	375.28	0.728515	-0.0271255	0.00590362	1120.65	0.79498	0.0438297	0.0071545
Gm02_12028627	235.93	0.791821	0.0140041	0.00878781	283.091	0.709281	-0.0131421	0.00722495	2529.47	0.772179	0.0479986	0.00585769	77.9006	0.728578	0.00905104	0.00588406	1637.61	0.79496	0.0394986	0.00639611
Gm02_12049715	864.194	0.791665	-0.0415696	0.00661232	221.975	0.709275	0.0174219	0.00621899	2019.79	0.772078	0.0686539	0.00614613	0.0906788	0.728589	-0.000524026	0.00567323	509.747	0.795085	0.0351803	0.00597969
Gm02_12069296	1673.81	0.791494	-0.0569991	0.00648744	349.988	0.709255	0.0215743	0.00613752	2232.51	0.772037	0.0710476	0.00620688	70.6235	0.728572	-0.0143664	0.00573353	346.195	0.795126	0.0285439	0.00591028
Gm02_12117116	782.148	0.791682	-0.0398107	0.00608828	318.926	0.709259	0.0209902	0.00570292	2339.47	0.772001	0.0744524	0.00664513	48.1372	0.728577	-0.012196	0.00620988	144.681	0.795173	0.0188877	0.0055411
Gm02_12140946	1491.64	0.791529	-0.0544628	0.00585819	431.42	0.709241	0.0241934	0.00599883	2206.54	0.772036	0.0716091	0.0065914	41.0034	0.728579	-0.0111351	0.00581375	413.609	0.795108	0.0316249	0.0056452
Gm02_12159762	1742.03	0.791479	-0.058186	0.00567545	538.914	0.709224	0.0267647	0.00603893	2602.91	0.771953	0.0767687	0.00710632	89.9422	0.728567	-0.0162254	0.00619955	399.772	0.795113	0.0306971	0.00576632
Gm02_12240559	977.156	0.791662	-0.0396871	0.00561113	1234.63	0.709126	0.0372743	0.00669569	1327.98	0.772272	0.0492988	0.00648893	1132.3	0.728349	-0.050352	0.00638641	238.28	0.795157	-0.0213262	0.00690449
Gm02_13102626	1695.07	0.791563	-0.0457045	0.00572601	4059.59	0.708777	0.0592747	0.00676995	94.6417	0.772526	0.0114759	0.00664405	763.615	0.728449	-0.0359023	0.00624751	133.214	0.795183	0.0139039	0.00624775
Gm02_13482571	631.515	0.791746	-0.0278409	0.00527493	3495.37	0.708852	0.0548735	0.00727165	127.539	0.77252	0.0133078	0.00584912	497.896	0.728497	-0.0290459	0.00689936	143.402	0.795181	0.0144089	0.00622741
Gm02_13521441	1088.78	0.791664	-0.0373085	0.00576269	4803.86	0.708668	0.0655733	0.0084932	258.514	0.772496	0.0193673	0.0061703	383.237	0.728517	-0.0261257	0.0067449	74.698	0.795194	0.0106293	0.00663204
Gm02_13573779	145.276	0.791834	0.0106805	0.00546869	1492.07	0.709152	0.0291493	0.00709347	1059.62	0.772395	-0.0302171	0.00563808	368.951	0.728537	-0.019178	0.00703797	484.872	0.795137	-0.0209028	0.00678054
Gm02_13681450	138.328	0.791833	-0.0112122	0.00596213	620.101	0.709241	0.0201686	0.00708754	118.374	0.772525	-0.0108484	0.00511651	723.697	0.72848	-0.0286827	0.00684875	1205.84	0.795017	-0.0354032	0.00766579
Gm02_13904897	838.202	0.791736	0.026312	0.0080479	2906.21	0.708994	-0.0415696	0.0094632	1.49157	0.772543	-0.00116689	0.00518112	352.515	0.728538	-0.0193799	0.00730103	187.77	0.79518	0.013383	0.00627741
Gm02_13922555	433.418	0.791762	-0.0284783	0.00625711	95.6723	0.709297	-0.0111347	0.00657814	15.5403	0.772539	-0.00579362	0.00473719	239.195	0.728533	-0.0255137	0.00670867	341.812	0.795129	-0.0277174	0.00594091
Gm02_13939428	917.215	0.791657	-0.0420488	0.0065795	361.723	0.709253	-0.021906	0.00630588	0.496576	0.772543	0.00105304	0.0049622	38.1458	0.72858	-0.0103935	0.00711461	567.676	0.795074	-0.0363113	0.00565884
Gm02_14008988	409.105	0.791763	-0.0290836	0.00646385	877.633	0.709164	-0.0352292	0.00620857	215.349	0.772492	-0.0227874	0.004857	359.749	0.728499	0.0333923	0.00704444	58.6524	0.795194	-0.012127	0.00567969
Gm02_14036675	563.586	0.79173	-0.0337273	0.00582491	279.901	0.709266	-0.0196415	0.00578039	167.925	0.772504	-0.0198715	0.00492582	2059.29	0.728083	0.078749	0.00761045	1.96826	0.795208	-0.00219396	0.00610279
Gm02_14051564	471.335	0.791751	-0.0307556	0.00635801	538.579	0.709223	-0.0272138	0.0057405	51.5834	0.772531	-0.0109789	0.00513662	567.47	0.72845	0.0412021	0.00691211	95.3913	0.795185	-0.015225	0.00618377
Gm02_14076032	246.242	0.7918	-0.022379	0.00623109	5.45871	0.709311	-0.00275704	0.00578251	163.643	0.772505	-0.0196801	0.00521467	272.128	0.728522	0.0286925	0.00725114	115.069	0.79518	-0.0168298	0.00636427
Gm02_14095240	120.298	0.79183	0.0137512	0.00600851	110.482	0.709296	0.0109511	0.00583116	510.56	0.77244	-0.0303422	0.00534986	747.545	0.72843	0.0410016	0.00679247	196.501	0.795166	0.0192105	0.00611985
Gm02_14114204	313.746	0.791793	0.0220292	0.00610896	285.682	0.70927	0.0174748	0.005722	952.334	0.772352	-0.0410845	0.00507141	857.771	0.728408	0.043509	0.00660405	435.227	0.795116	0.0283475	0.00606016
Gm02_14206941	34.3933	0.791847	0.00717267	0.00561371	381.48	0.709257	0.0198617	0.00597073	1141.16	0.772317	-0.0443124	0.0055269	1638.96	0.728247	0.0595721	0.00684445	303.143	0.795145	0.0233073	0.00626988
Gm02_14238670	63.0858	0.791842	0.00972084	0.00629382	362.932	0.70926	0.0193823	0.0056699	988.834	0.772347	-0.0412857	0.00495617	943.734	0.728392	0.0452679	0.00625478	138.658	0.795179	0.0157769	0.0057188
Gm02_14262652	78.9586	0.791839	0.0108756	0.0057688	305.807	0.709268	0.017794	0.00652482	1117.35	0.772322	-0.0438836	0.00533417	949.414	0.728391	0.0453952	0.00651086	209.838	0.795164	0.0194075	0.00586141
Gm02_14433210	6949.94	0.790819	0.0804891	0.00773749	53.0445	0.709306	0.00598474	0.00631731	3107.31	0.77207	-0.0563457	0.00555126	608.759	0.728496	0.0266447	0.00635188	626.108	0.795108	-0.0258799	0.00634622
Gm02_14516835	1110.59	0.791686	0.032582	0.00587416	322.935	0.709275	-0.0147238	0.00669731	435.255	0.772475	-0.0217092	0.00508203	1082.07	0.728413	0.0378515	0.00675802	8.18038	0.795207	0.00303907	0.00558421
Gm02_14548975	285.49	0.791811	0.0164838	0.00575831	1137.06	0.709181	-0.0275086	0.00671946	32.5315	0.772538	-0.00593098	0.00521107	166.484	0.728562	0.0148905	0.00670531	0.312223	0.795208	0.000593182	0.00587945
Gm02_14586948	1.62874	0.791854	-0.00122338	0.00555689	3270.22	0.70894	-0.0458274	0.00637662	72.4633	0.772532	0.00869242	0.00515516	72.5621	0.728578	0.00964056	0.00699342	81.2124	0.795195	0.00939495	0.00546682
Gm02_14693206	42.4841	0.791848	-0.00602707	0.00593103	345.34	0.709274	-0.014354	0.00629994	126.045	0.772524	-0.0110464	0.00555039	2742.3	0.728166	0.0569424	0.00776116	1024.64	0.795048	0.0321524	0.0061343
Gm02_14731947	123.22	0.791837	-0.00984703	0.00550691	357.218	0.709275	-0.0140292	0.00631352	421.46	0.772483	0.0193872	0.00598332	1434.06	0.728376	0.0396293	0.00676856	534.157	0.795128	0.0222833	0.00581625
Gm02_14759913	4.0282	0.791853	0.00177463	0.0055415	1156.34	0.709191	-0.0251235	0.00617051	47.6181	0.772536	0.00649222	0.00590375	541.286	0.728509	0.024233	0.00708663	545.647	0.795127	0.0224369	0.00592716
Gm02_14798101	536.922	0.791788	0.0183843	0.0059919	4164.2	0.708916	-0.0433188	0.00712337	22.8284	0.77254	0.00399758	0.00635659	157.894	0.728569	0.0114265	0.00641189	390.731	0.795156	-0.0169001	0.00616084
Gm02_15206590	69.8949	0.791848	0.00411352	0.00527456	3050.43	0.709128	-0.0235641	0.00640865	269.963	0.772522	0.00837532	0.0064624	1401.19	0.728482	0.0201642	0.00719231	1407.28	0.795094	0.0195698	0.00602773
Gm02_43710062	748.893	0.791786	0.0159491	0.00579481	831.211	0.709252	0.0147755	0.00669033	9152.85	0.771708	-0.0579891	0.00963083	3400.48	0.728278	0.0376752	0.00647236	70.0151	0.795201	-0.00519426	0.00527607
Gm02_43822930	3.10005	0.791854	-0.000854416	0.00621226	163.725	0.709302	0.00535201	0.0058896	3442.62	0.77228	-0.0297875	0.00700866	213.536	0.728573	0.00800552	0.00637421	190.969	0.795193	-0.00717595	0.00556186
Gm02_44721205	6780.23	0.791289	-0.044416	0.0064407	9.41409	0.709312	0.00144594	0.00571939	2360.48	0.772343	0.0272751	0.00577795	3981.04	0.728252	-0.0376719	0.00708448	4119.28	0.794841	-0.0368576	0.00626544
Gm02_45229965	7587.71	0.790807	-0.0779288	0.00716423	5.67718	0.709312	-0.00179251	0.00584905	277.975	0.772503	-0.0157061	0.00513721	1639.75	0.728352	-0.0412919	0.0061075	7584.83	0.794078	-0.0837451	0.00690759
Gm02_45298949	7935.79	0.790753	-0.0800825	0.00692366	1.72525	0.709312	-0.000992773	0.00545568	159.838	0.77252	-0.0119716	0.00511591	1621.26	0.728353	-0.0412884	0.00678853	8084.32	0.793998	-0.0868946	0.00714899
Gm02_45366373	784.62	0.791672	-0.0420874	0.00690792	391.622	0.709244	-0.0244225	0.00597532	0.653382	0.772543	0.00131125	0.00496399	299.987	0.728511	-0.0317301	0.00585418	1468.55	0.794831	-0.063365	0.00642646
Gm02_45381837	359.143	0.791769	-0.0290066	0.00641084	130.298	0.709289	-0.0143155	0.00592412	42.4702	0.772532	-0.010787	0.00526828	318.608	0.728504	-0.0334824	0.00595603	1040.53	0.794936	-0.0544223	0.0062863
Gm02_45403074	3783.73	0.791069	-0.082671	0.00634426	394.085	0.70925	-0.0222194	0.0056416	354.307	0.772467	0.0268776	0.00530862	92.755	0.728569	-0.0150565	0.00563681	1895.7	0.79478	-0.0634722	0.00646759
Gm02_45451301	610.809	0.791702	-0.0398792	0.00598451	40.1078	0.709305	-0.00834843	0.00556727	7.76796	0.772541	-0.00487989	0.00554226	43.5157	0.728577	-0.0131621	0.00559511	1291.55	0.794851	-0.0641096	0.0064505
Gm02_45484363	886.505	0.791632	-0.0482385	0.00626121	34.2627	0.709306	-0.00775027	0.0057084	45.2313	0.772531	-0.0118184	0.00590598	42.1968	0.728577	-0.0129914	0.00541827	745.193	0.795001	-0.048887	0.00697876
Gm02_45498457	3085.7	0.791111	-0.0866397	0.00614998	453.99	0.709229	-0.027559	0.00546835	1898.82	0.772067	0.0725151	0.00647463	9.0337	0.728587	-0.00551285	0.00541862	788.273	0.795	-0.0477191	0.00623181
Gm02_45551747	0.170431	0.791854	0.000728306	0.00592918	2.53911	0.709312	0.00229555	0.00561453	84.7517	0.772518	0.0176412	0.00574781	275.639	0.728504	-0.0362482	0.00580329	199.852	0.795147	-0.0276095	0.00622427
Gm02_45576930	217.637	0.791793	0.0268337	0.00620623	84.0817	0.709294	0.0135695	0.00571886	0.000686892	0.772543	5.19552e-05	0.00575486	34.2957	0.728578	-0.0133154	0.00570152	44.8047	0.795194	-0.0135199	0.0062394
Gm02_45638104	301.488	0.791768	0.0318134	0.00603097	370.774	0.709234	0.0286894	0.00576082	44.7929	0.772529	-0.0133707	0.00560322	16.0964	0.728584	0.00920316	0.00594681	0.0353524	0.795208	0.00038272	0.00606937
Gm02_45691796	1253.4	0.791533	-0.0587	0.00755195	2.37449	0.709312	-0.00210971	0.00591274	567.142	0.772391	0.0423098	0.00641978	231.215	0.728525	0.0299964	0.00673433	192.099	0.795154	-0.0251333	0.00539667
Gm02_45708548	239.204	0.791788	0.0273465	0.0059632	410.274	0.709228	0.0292164	0.00563648	0.000353579	0.772543	3.61171e-05	0.00581985	7.4607	0.728587	0.00598067	0.00639229	6.44572	0.795206	-0.00497019	0.00599756
Gm02_45726162	2206.71	0.79129	0.0777825	0.00604024	39.4535	0.709305	0.0085456	0.00558747	1135.52	0.772237	-0.0601745	0.00610304	71.0055	0.728569	-0.0169415	0.00678665	111.042	0.795177	0.019199	0.00611393
Gm02_45767224	3135.55	0.791049	0.0931374	0.00553754	127.012	0.709288	0.0154017	0.00588184	1540.68	0.772126	-0.0704374	0.00636688	14.757	0.728585	-0.00776625	0.00683431	25.2612	0.795201	0.00920366	0.00683332
Gm02_45783433	2747.82	0.79115	0.0870447	0.00500486	195.327	0.709274	0.0190694	0.0058737	1514	0.772134	-0.0696913	0.00574017	0.614771	0.728589	-0.00158166	0.00750545	45.586	0.795195	0.01234	0.00798762
Gm02_45865515	2498.95	0.791302	0.0714902	0.00501398	419.472	0.709242	-0.0242191	0.00593099	975.618	0.772318	-0.0478322	0.00578016	49.349	0.728577	0.0119369	0.00714451	2853.22	0.794517	0.0834366	0.00758773
Gm02_45884216	2043.24	0.791447	0.0582734	0.00474643	386.79	0.709244	-0.0244548	0.00547267	675.565	0.772403	-0.0355993	0.00533529	1824.65	0.728204	0.0636526	0.00793992	4906.29	0.794146	0.0978736	0.00705325
Gm02_45932914	14.8263	0.791851	-0.00464231	0.00511244	500.271	0.70923	-0.0259461	0.00533971	13.5993	0.77254	-0.00469453	0.00525097	4361.33	0.727741	0.0906492	0.0106373	3514.59	0.7945	0.077053	0.00739006
Gm02_46010086	8.32082	0.791852	0.00390028	0.00531228	2204.89	0.708963	-0.0524277	0.00543433	21.2356	0.772538	-0.0066915	0.00512681	224.653	0.728537	0.0244468	0.00726598	1131.39	0.794948	0.0498129	0.00670398
Gm02_46025695	141.282	0.791825	0.0157315	0.00528758	1848.42	0.709025	-0.0470391	0.00562938	234.993	0.772493	-0.0217676	0.00497692	420.784	0.728494	0.0326646	0.00712868	1933.07	0.794774	0.0636679	0.00632142
Gm02_46093017	26.8537	0.791848	-0.00671487	0.00518494	787.131	0.709193	-0.0300518	0.0059045	6.73267	0.772541	-0.00360788	0.00520381	497.189	0.728479	0.0348112	0.00682632	1476.66	0.794883	0.0544919	0.00580856
Gm02_46120953	77.3436	0.791838	0.0115493	0.00498507	1188.92	0.709129	-0.0374145	0.0061027	119.12	0.772518	-0.0153873	0.00522522	508.847	0.728475	0.0357411	0.00636416	1195.13	0.794942	0.0497094	0.00557334
Gm02_46183461	0.0642052	0.791854	0.000318796	0.00491127	1613.12	0.709074	-0.041889	0.0063505	1.5795	0.772543	0.00169003	0.00570256	2.92453	0.728589	-0.00256174	0.00617402	534.542	0.795094	0.0317276	0.00553743
Gm02_47382887	113.774	0.791837	0.0100712	0.00534061	588.006	0.709246	0.019238	0.00613677	26.4504	0.772539	0.00509357	0.00657997	81.3584	0.728577	0.009616	0.00584079	350.063	0.795153	0.0189446	0.00557916
Gm02_47477220	232.318	0.79182	0.0143633	0.00490718	1467.98	0.709148	0.0302642	0.00673729	7.33753	0.772542	-0.00268372	0.00622874	385.344	0.728531	-0.0210368	0.00694465	40.7989	0.795202	0.00646874	0.00557774
Gm02_47512710	21.1048	0.791851	0.00455784	0.00526376	200.358	0.709289	-0.0117293	0.00595103	1717.88	0.772271	-0.04347	0.0074437	277.712	0.728544	-0.0191106	0.00701903	599.148	0.795108	-0.0262337	0.00687125
Gm02_47541232	150.222	0.79183	0.0124828	0.00548664	2368.92	0.709027	0.0413064	0.00616599	1508.53	0.772298	-0.0419198	0.00710131	452.873	0.728513	0.0252801	0.00690934	1776.62	0.794904	0.0464621	0.00666278
Gm02_47593467	222.633	0.791819	0.0151214	0.00641317	2306.99	0.709036	0.0405766	0.00627093	1578.76	0.772288	-0.0426562	0.0068364	364.387	0.728528	0.0225394	0.00740073	1709.43	0.794917	0.0453354	0.00722565
Gm02_47684621	454.305	0.791777	-0.0234141	0.00651803	327.44	0.70927	-0.0165482	0.00585517	160.937	0.772515	-0.014792	0.00607905	2001.08	0.728226	-0.0572776	0.00953412	101.949	0.795189	-0.0120244	0.00655477
Gm02_47803503	3426.78	0.79142	-0.0479995	0.00766176	185.59	0.709294	-0.00943753	0.0061839	392.716	0.772492	0.0169688	0.00725459	3011.12	0.728199	0.0502154	0.0080551	231.468	0.795177	0.0133255	0.00658218
Gm02_47847632	82.553	0.79184	-0.0095264	0.00668878	4707.41	0.708727	-0.0601531	0.00779931	315.887	0.77249	-0.0196431	0.00611232	119.204	0.728569	-0.0130673	0.00674982	190.898	0.795175	0.0156067	0.00666756
Gm02_47883707	5721.71	0.791108	-0.0639008	0.00824639	9.69388	0.709311	0.00222502	0.00580266	976.242	0.772413	0.0275361	0.00665545	438.962	0.728531	0.0196781	0.00690954	1010.27	0.795067	-0.0286559	0.00728097
Gm02_48117364	612.67	0.791722	0.0343595	0.00700559	247.756	0.709272	-0.0180576	0.00621329	3786.66	0.771699	-0.0911444	0.00872719	1392.16	0.728265	0.0612024	0.00609489	345.83	0.795127	0.0281454	0.0083828
Gm02_48155438	55.5171	0.791841	-0.0114489	0.0063819	212.919	0.709274	0.0183605	0.00622828	2.44389	0.772542	-0.00259167	0.00602131	23.859	0.728583	0.00914979	0.00619522	2172.57	0.794639	-0.078747	0.00799616
Gm02_48193435	74.0528	0.791836	-0.0132731	0.0058076	116.338	0.709291	0.0136152	0.00600577	25.1787	0.772537	0.00835662	0.00616279	2.6876	0.728588	-0.00308983	0.00646033	1380.35	0.794845	-0.0630667	0.00807752
Gm02_48226137	37.6622	0.791845	-0.00931168	0.00562792	595.608	0.709207	0.030372	0.0061534	0.000930207	0.772543	4.98403e-05	0.00612992	96.5368	0.728564	0.0180777	0.00640031	1884.59	0.794721	-0.0723146	0.00906174
Gm02_48292806	319.859	0.791777	-0.0277301	0.00553357	137.779	0.709287	0.0149095	0.00565674	1.16352	0.772543	0.00180414	0.0056595	61.7131	0.728573	-0.0148316	0.00717949	1407.93	0.794836	-0.0639736	0.00937735
Gm02_48320261	15.1746	0.79185	0.00595707	0.00521746	48.8633	0.709303	0.00877371	0.00553784	268.887	0.772476	-0.0269821	0.00610664	16.5691	0.728585	-0.00752575	0.00673949	1309.56	0.794867	-0.0607203	0.0100871
Gm02_48345475	74.3359	0.791838	0.0119916	0.00524718	358.597	0.709254	-0.0217884	0.00591959	2058.74	0.772083	-0.0672543	0.00729495	0.731618	0.728589	-0.00139986	0.00731756	1133.8	0.794942	0.0509691	0.0103396
Gm02_48371970	678.784	0.791762	-0.0227653	0.0050761	1.1582	0.709312	-0.00079974	0.00587443	421.308	0.772485	-0.0185693	0.00582676	4325.32	0.728007	0.0624868	0.0113882	14769.2	0.793097	0.112258	0.0181214
Gm02_48560715	422.273	0.791763	-0.0285058	0.00502964	2.36468	0.709312	-0.00176303	0.00568926	206.938	0.772497	0.021313	0.00714652	79.3011	0.728571	-0.0146458	0.00692273	346.447	0.795127	-0.028148	0.0100237
Gm02_48584189	244.29	0.791801	-0.0216875	0.00486465	13.3093	0.70931	-0.00418304	0.00605886	115.781	0.772517	0.0159477	0.00651789	239.788	0.728533	-0.0254801	0.00701242	95.9461	0.795185	-0.0148188	0.0084719
Gm02_48692694	323.602	0.791786	-0.0244422	0.0051908	53.4072	0.709304	-0.00822328	0.00587376	2.49225	0.772542	-0.00228625	0.0069316	75.6534	0.728572	-0.0139257	0.00683333	23.8494	0.795203	-0.00722055	0.00807076
Gm02_48709917	260.747	0.7918	-0.0216036	0.00510334	290.864	0.709266	-0.0189165	0.0065889	8.90417	0.772541	-0.00424919	0.00747837	7.9146	0.728587	-0.00441789	0.00682724	75.8802	0.795191	-0.0126656	0.00735797
Gm02_49142714	5.10937	0.791853	-0.00254509	0.00528484	1462.56	0.709116	0.0361055	0.00661393	3589.22	0.771908	0.0704254	0.00711274	0.486403	0.728589	0.000871219	0.00667804	716.826	0.795074	-0.032214	0.00724655
Gm02_49323313	3.12682	0.791853	-0.00240121	0.00532822	681.087	0.709204	0.0291518	0.00607888	2584.29	0.771979	0.0736272	0.00641175	1302.5	0.728294	-0.0576603	0.00778009	255.652	0.795149	-0.0236556	0.00712359
Gm02_49371792	1658.11	0.791632	-0.0353159	0.00530169	1243.82	0.709183	0.0258028	0.0062074	585.92	0.772463	0.0219198	0.00588613	172.097	0.728566	0.0126707	0.00697516	4291.71	0.794592	0.0606408	0.010425
Gm02_49397030	140.489	0.791821	-0.0177961	0.00520637	598.774	0.709209	0.029843	0.00620993	949.633	0.77231	0.0502515	0.00549068	23.7307	0.728583	-0.00910936	0.00663755	45.615	0.795196	-0.0112271	0.00659679
Gm02_49418627	111.941	0.791828	-0.0158408	0.00521735	445.777	0.709235	0.0256866	0.00632057	910.551	0.77232	0.0490475	0.0053644	2.91521	0.728588	-0.00317957	0.00655826	240.436	0.795146	-0.0256916	0.00677515
Gm02_49458531	92.3464	0.791832	-0.0145255	0.00515863	864.438	0.709162	0.0360752	0.00624245	478.748	0.772424	0.0359542	0.0053515	1.47174	0.728589	0.00228979	0.00682266	134.817	0.795173	-0.0194446	0.00641587
Gm02_49474297	29.9929	0.791847	-0.00823548	0.0055782	1283.41	0.70909	0.0437319	0.00598425	72.3226	0.772525	0.0139044	0.00505474	1.89672	0.728589	0.00258646	0.0066961	172.286	0.795163	-0.0218679	0.00622818
Gm02_49495597	18.1676	0.79185	-0.00627206	0.00542514	1140.61	0.709118	0.040431	0.00599966	29.9573	0.772536	0.00873644	0.00483992	2.89727	0.728588	-0.00310653	0.00680397	210.008	0.795155	-0.0235751	0.00598726
Gm02_49512012	5.7887	0.791852	0.00356253	0.00557231	1177.15	0.709111	0.0413183	0.00618481	31.7497	0.772535	0.00905096	0.00501702	30.5646	0.728581	0.0101488	0.00768821	119.926	0.795178	-0.0179287	0.00600681
Gm02_49542734	893.131	0.791677	0.0383099	0.00542707	2059.93	0.709002	0.0481357	0.00626432	751.251	0.772389	-0.0373126	0.0053341	13.9113	0.728586	-0.00554729	0.00705187	285.802	0.795146	-0.0235087	0.00638276
Gm02_49991787	501.635	0.791768	0.0248843	0.00598437	2950.54	0.708927	0.0500561	0.00640131	14.8093	0.77254	-0.00453468	0.0050875	2583.65	0.728118	-0.0654385	0.00764702	221.262	0.795167	0.017903	0.00658806
Gm02_50027787	745.989	0.791738	0.0273297	0.00596917	6353.01	0.708561	0.0665024	0.00662992	12.8721	0.772541	0.00378617	0.00553785	4326.26	0.727889	-0.0750869	0.00860624	185.639	0.795177	-0.0146938	0.00660386
Gm02_50204121	579.488	0.791744	-0.0294765	0.00607041	967.106	0.709175	0.0309817	0.00627859	132.683	0.772516	0.0153264	0.00568818	904.761	0.728393	-0.0459723	0.0077202	145.428	0.795177	0.0163514	0.0063106
Gm02_50228376	278.394	0.791801	-0.0202861	0.00617943	944.093	0.70918	0.0304098	0.00611983	22.5383	0.772538	0.00626643	0.00544675	979.246	0.728379	-0.0473573	0.00719298	433.783	0.795118	0.0280146	0.00602048
Gm02_50248315	494.721	0.791761	-0.0271199	0.00631297	1520.7	0.709098	0.0386973	0.00645439	9.54159	0.772541	0.00408994	0.00554974	532.674	0.728474	-0.0350543	0.00743095	151.867	0.795176	0.0166283	0.00579101
Gm02_50268621	412.408	0.791777	-0.0244421	0.00717771	1073.49	0.709163	0.0321296	0.00635726	203.792	0.772503	0.018632	0.00575841	1164.62	0.728343	-0.0509435	0.00695633	114.224	0.795184	0.014218	0.00559085
Gm02_50390593	966.918	0.791717	-0.0283981	0.00776599	495.046	0.709259	-0.0169449	0.0067448	47.0947	0.772536	0.00663339	0.00559734	110.212	0.728573	-0.0111072	0.00721379	208.55	0.795176	0.0142597	0.00548069
Gm02_50434179	603.567	0.791769	-0.0222631	0.00862343	319.031	0.709278	-0.0135001	0.00727972	0.3065	0.772543	-0.000530843	0.00602891	62.9652	0.72858	-0.00832474	0.00637219	435.032	0.795142	0.0204293	0.00509174
Gm02_50510606	28.3336	0.79185	-0.00473605	0.00886189	330.738	0.709277	0.0135055	0.0080178	431.16	0.772482	0.0194961	0.00754377	368.915	0.728536	-0.0195816	0.00616513	126.252	0.795189	-0.0107813	0.00537355
Gm03_7163	7911.75	0.790802	0.0766293	0.0101701	881.07	0.709223	-0.0212765	0.00785552	3010.63	0.772125	-0.0505152	0.00675747	15.4336	0.728587	0.00400998	0.0064009	590.429	0.795122	0.022845	0.00553541
Gm03_140242	9859.75	0.790491	0.0889881	0.00865868	23.1718	0.70931	-0.00357872	0.00756613	5469.21	0.771752	-0.071028	0.00741261	3576.59	0.728047	0.0640118	0.00795585	4084.75	0.794587	0.0626563	0.0064618
Gm03_172818	3116.31	0.791361	0.0571324	0.00646597	312.71	0.709275	-0.0148623	0.00668588	968.84	0.772381	-0.0344756	0.006589	717.298	0.728461	-0.0336646	0.00760407	59.1677	0.795198	0.008688	0.00596663
Gm03_192792	2375.94	0.791533	0.0426325	0.00608058	8.00706	0.709311	-0.00205819	0.00621875	6023.69	0.771695	-0.072527	0.00817847	156.459	0.728566	-0.0129965	0.00766494	249.643	0.795171	0.0150853	0.00584655
Gm03_216599	823.151	0.791719	0.0305021	0.00593143	67.7672	0.709304	-0.0071577	0.00657071	0.0137588	0.772543	-0.000135238	0.00704157	3483.03	0.727942	-0.0774149	0.00880687	3.53218	0.795207	0.00220873	0.00592245
Gm03_249247	324.094	0.791797	0.0203199	0.00554663	511.416	0.709245	-0.0208085	0.00533006	1.20109	0.772543	0.00134921	0.00701883	1959.86	0.728195	-0.0628196	0.00787497	49.3555	0.795198	-0.00881099	0.00577343
Gm03_275381	313.913	0.791799	0.0201642	0.00544496	575.203	0.709236	-0.0222723	0.00556944	31.28	0.772537	-0.00693641	0.00708596	2671.4	0.728049	-0.0737294	0.00879922	1.0308	0.795208	-0.00128292	0.00565019
Gm03_294547	15.0984	0.791851	0.0042634	0.0056005	653.252	0.709229	-0.0229724	0.00601649	239.988	0.7725	0.0184532	0.00680732	4709.53	0.727682	-0.0932875	0.00974961	8.43963	0.795206	-0.00352714	0.00562689
Gm03_331423	141.378	0.791835	0.0102888	0.00524549	0.0174038	0.709312	9.51845e-05	0.00539809	3241.05	0.772093	-0.0524511	0.010397	552.227	0.72851	-0.023895	0.0080595	2041.32	0.79491	0.0425087	0.00614238
Gm03_426154	321.319	0.791817	-0.0133701	0.00595051	41.4671	0.709308	0.0040594	0.00557226	204.198	0.772519	0.0112515	0.00605249	563.14	0.728521	0.0203667	0.00938246	313.018	0.795169	-0.014234	0.00605639
Gm03_511376	1297.63	0.791707	-0.0263046	0.0058358	50.6425	0.709308	0.00440729	0.00527621	1124.1	0.772413	0.0258032	0.00574376	691.803	0.728507	0.0220084	0.00853731	1214.94	0.79506	-0.0274138	0.00629728
Gm03_588585	72.953	0.791846	0.00584594	0.00589276	625.651	0.70926	0.0146014	0.00518031	113.067	0.772531	-0.00756812	0.00654185	320.413	0.728555	-0.0134658	0.00798674	626.389	0.795137	0.0182264	0.00751404
Gm03_845787	807.09	0.79178	0.0167437	0.00544972	2313.39	0.709146	-0.0242797	0.00531698	525.039	0.772494	0.0141223	0.0058262	386.098	0.728553	0.0130228	0.00765462	4054.99	0.794812	-0.0401177	0.00772797
Gm03_944915	915.79	0.791769	0.0181765	0.00575153	648.397	0.709265	-0.0131855	0.0051298	72.9246	0.772536	-0.00535939	0.00591492	1113.17	0.728483	0.0224662	0.00861198	1080.29	0.7951	-0.0210937	0.00637687
Gm03_1046029	1943.42	0.791536	-0.0466648	0.00730778	1387	0.709138	-0.0329037	0.00565684	4649.11	0.771755	0.0767161	0.0094744	9285.96	0.726968	-0.118889	0.0117297	2273.04	0.794803	-0.0548048	0.00655247
Gm03_1061417	29.5414	0.791848	0.00720958	0.00539738	363.799	0.709256	-0.0207457	0.00578576	172.362	0.772505	0.0189155	0.00578548	1751.81	0.728179	-0.0690646	0.0080701	332.043	0.795132	-0.0267547	0.00634504
Gm03_1079455	89.6769	0.791838	0.0110278	0.00537748	1218.39	0.709145	-0.0337264	0.00579	21.1855	0.772539	-0.00574916	0.00652616	1298.48	0.728332	-0.05024	0.00777677	134.915	0.795181	-0.0148029	0.00628341
Gm03_1117272	7.78095	0.791852	0.00382658	0.00547245	105.494	0.709295	-0.0115159	0.00587196	159.621	0.772507	0.018904	0.00580732	655.379	0.728429	-0.0442624	0.00803776	155.277	0.795171	-0.018994	0.00639218
Gm03_1134476	8.67162	0.791852	0.00404649	0.005056	111.939	0.709294	-0.0118813	0.00555321	168.224	0.772505	0.0194438	0.0056065	934.299	0.72836	-0.0529679	0.00775138	128.029	0.795178	-0.0172798	0.00630511
Gm03_1209549	4.606	0.791853	0.00283363	0.00537437	1003.85	0.709158	-0.0343481	0.00593962	164.731	0.772507	0.0183928	0.00598112	1190.25	0.728312	-0.056577	0.00764515	17.8485	0.795204	-0.00617069	0.00647151
Gm03_1276396	2.21232	0.791853	-0.00195315	0.0054395	861.923	0.70918	-0.0316905	0.00553695	211.856	0.772497	0.0207158	0.00567245	406.614	0.728496	-0.0327499	0.00766781	10.6994	0.795206	0.00474569	0.00641418
Gm03_1333675	32.9767	0.791847	-0.00722324	0.00546767	1411.33	0.709104	0.0391137	0.00607009	0.271128	0.772543	-0.000704905	0.00545199	579.03	0.728464	0.0365881	0.00809542	21.3487	0.795203	-0.00638038	0.00712345
Gm03_1379657	149.139	0.791826	0.0146063	0.00589717	318.698	0.709267	0.0177302	0.00580656	215.454	0.772501	-0.0188356	0.00623112	202.609	0.728548	0.0204378	0.00739642	610.654	0.795084	0.0323512	0.00754578
Gm03_1404410	33.5014	0.791848	0.00699044	0.0063296	193.41	0.709285	0.0139383	0.00580616	175.933	0.772509	-0.0171998	0.00608997	94.1306	0.72857	0.0140989	0.00708965	463.809	0.795113	0.02849	0.00757906
Gm03_1429284	86.1875	0.791839	-0.0105725	0.0064956	28.977	0.709308	-0.00511326	0.00572682	77.101	0.772529	-0.0106642	0.00638165	155.944	0.728559	0.0167781	0.0076204	533.427	0.795105	0.0286332	0.00810827
Gm03_1555573	2521.63	0.7915	-0.0456105	0.00848885	1803.26	0.709115	-0.0327455	0.00568423	1636.66	0.772308	0.0385426	0.0077696	396.839	0.728532	-0.0203628	0.0074709	1855.43	0.794928	-0.0419574	0.00901185
Gm03_1576289	18.336	0.791851	-0.00387336	0.00682274	1764.07	0.709119	-0.0323967	0.00577286	60.7865	0.772534	-0.00738826	0.00735561	63.8693	0.72858	-0.0081221	0.00735558	345.18	0.795156	-0.0180022	0.00835726
Gm03_1592339	8069.59	0.790795	0.0763637	0.0109754	4835.29	0.708788	-0.0531963	0.00596565	5188.71	0.771854	-0.0635435	0.0143663	1453.87	0.728398	0.0354279	0.0114375	1863.4	0.794947	0.0389961	0.00674926
Gm03_1666725	197.274	0.791824	-0.0138568	0.00668377	828.143	0.709214	-0.0239688	0.00608944	3301.74	0.772023	0.0600741	0.00848047	106.475	0.728572	-0.0118305	0.00811023	723.514	0.795088	0.0287387	0.00654447
Gm03_1866314	138.334	0.79183	0.0132836	0.00599443	895.104	0.709193	-0.0280805	0.00630661	427.07	0.772465	0.025112	0.00743469	916.816	0.728411	0.0415006	0.00739884	736.294	0.795066	0.0336294	0.00625031
Gm03_1883072	60.9465	0.791843	0.0087433	0.00571185	1674.2	0.709091	-0.0380288	0.00652814	914.571	0.772377	0.0364438	0.00710621	528.944	0.728487	0.0312816	0.0073285	1149.07	0.794989	0.0416626	0.00596081
Gm03_1917673	1.97095	0.791853	0.00161985	0.0053154	2565.45	0.708965	-0.0483662	0.00668195	2170.08	0.772136	0.0579857	0.00624335	2.16541	0.728589	-0.00208063	0.00726357	353.211	0.795138	0.0238646	0.0059445
Gm03_1950906	108.382	0.791834	-0.0122164	0.00491359	0.228685	0.709312	0.000464396	0.00662052	1523.02	0.772253	0.049277	0.00561993	1.6164	0.728589	0.00181155	0.00720041	86.1622	0.795191	0.0119587	0.00660859
Gm03_1978468	95.0234	0.791837	-0.0113937	0.0045635	41.2207	0.709306	-0.00621282	0.00711779	1271.66	0.772302	0.044831	0.00556465	26.8156	0.728584	0.00733794	0.00775955	161.781	0.795176	0.0163146	0.0063253
Gm03_2068944	290.173	0.791813	-0.0155262	0.00466698	1183.15	0.709179	-0.0271965	0.00587198	1847.68	0.772277	0.0410841	0.00528932	2228.6	0.728266	-0.0483401	0.00782077	835.521	0.795081	-0.0282523	0.00659158
Gm03_2086983	0.111207	0.791854	-0.00033	0.00487229	418.999	0.709262	-0.0171302	0.00619591	875.274	0.772405	0.0308903	0.00581291	2119.33	0.728249	-0.052168	0.00808815	0.086282	0.795208	-0.000313461	0.00604449
Gm03_2153294	71.5422	0.791844	-0.00775758	0.00529452	4923.78	0.708765	-0.0549614	0.00749636	2813.06	0.772135	0.05111	0.00662473	8997.37	0.727266	-0.0984938	0.0103615	350.79	0.795154	-0.018458	0.00613382
Gm03_2182974	741.293	0.791756	-0.0232665	0.00648388	1753.7	0.70913	-0.030622	0.00601097	1031.39	0.772404	0.0286109	0.00552997	1307.43	0.728413	-0.0342655	0.0084438	27.8623	0.795204	-0.00481145	0.00602311
Gm03_2922035	201.828	0.791819	0.0159242	0.00664034	1055.54	0.709169	-0.031014	0.00655011	91.7918	0.772527	0.0112298	0.00749942	529.808	0.728495	0.0288505	0.00876136	21.7679	0.795204	-0.00559305	0.00668205
Gm03_2998382	273.84	0.791808	-0.017971	0.00578009	623.442	0.709231	-0.0228657	0.00636303	520.417	0.772453	0.0260656	0.00589219	45.4935	0.728581	0.00833395	0.0081365	1429.04	0.794949	-0.0441384	0.00731847
Gm03_3026705	41.3202	0.791845	0.00837228	0.00560457	36.3753	0.709306	0.00661696	0.00630912	1276.34	0.772278	0.0491451	0.00539278	135.871	0.72856	-0.0175062	0.00731729	0.374608	0.795208	0.000860536	0.00659716
Gm03_3040820	86.0395	0.791842	0.00838509	0.00592906	4442.09	0.708807	-0.053507	0.00874816	2247.86	0.772222	0.0448939	0.00570977	3660.76	0.728061	-0.0615328	0.00870055	2814.58	0.794786	-0.0513586	0.00928322
Gm03_3078702	134.247	0.791836	-0.00970979	0.00616483	434.71	0.709268	0.0148743	0.00648116	979.782	0.772414	0.0273982	0.00562581	140.756	0.728571	-0.011107	0.00685968	1927.03	0.794941	0.0392922	0.00780406
Gm03_3177080	985.046	0.791737	-0.0241845	0.00547507	3827.86	0.708953	0.0409671	0.00745915	99.8197	0.772531	-0.00799756	0.0054269	220.648	0.728563	0.0125811	0.00755375	272.176	0.795173	0.0135139	0.0061319
Gm03_3250909	1269.64	0.791724	0.0235188	0.00524944	2037.53	0.709146	0.0259375	0.00691704	208.581	0.772521	-0.0099039	0.0049207	665.842	0.728521	0.0187646	0.00629485	84.217	0.795199	0.0064397	0.00589528
Gm03_3302584	996.547	0.791644	0.0430757	0.00599656	1015.94	0.709149	0.0359962	0.0060761	339.368	0.772467	-0.0271981	0.00491689	1682.27	0.728188	0.0689624	0.00686632	717.877	0.79504	0.0403234	0.00613213
Gm03_3331976	626.64	0.791752	0.0262586	0.00571337	2333.51	0.709008	-0.044433	0.0072882	263.833	0.772499	-0.0181037	0.00487229	47.4492	0.728581	-0.0084388	0.00748274	46.5866	0.7952	-0.00776892	0.00635933
Gm03_3358231	846.044	0.791734	-0.0267306	0.00874555	102.766	0.7093	-0.00810795	0.00582764	740.448	0.772436	-0.0261276	0.00518371	2716.29	0.728194	0.0534641	0.00670106	529.816	0.795127	0.0226049	0.00585575
Gm03_3380209	1348.03	0.79156	0.0518334	0.00599475	1509.4	0.709063	0.0452121	0.00542111	679.2	0.772386	-0.0399679	0.0052756	2987.09	0.727844	0.0962376	0.0064414	835.103	0.795006	0.0451615	0.00598446
Gm03_3394037	1390.35	0.79155	0.0527101	0.00587638	1587.5	0.70905	0.0464046	0.00558316	967.391	0.772319	-0.0477886	0.00529666	3662.68	0.727673	0.106891	0.00697522	645.855	0.795051	0.0397935	0.00597258
Gm03_3466488	791.423	0.791703	0.0346239	0.00545041	2099.56	0.709006	0.0471093	0.00564007	3355.53	0.771878	-0.0762221	0.0059957	2531.07	0.728063	0.0738247	0.00653064	47.292	0.795198	-0.00924274	0.00758517
Gm03_3486985	1052.53	0.791622	0.0462334	0.00516671	992.509	0.709147	0.0370034	0.00528301	637.757	0.772394	-0.0391089	0.00528206	2604.93	0.727932	0.0908252	0.00650178	426.607	0.795104	0.0325972	0.00614924
Gm03_3501824	925.246	0.791651	0.0432484	0.00517594	1165.53	0.709118	0.0400047	0.00551581	574.107	0.772409	-0.0370166	0.00543224	1915.01	0.728107	0.07769	0.00638384	263.717	0.795144	0.0255684	0.00616489
Gm03_3553356	582.579	0.791764	0.024048	0.00556903	208.945	0.709287	0.0122808	0.0054135	1.54334	0.772543	0.00128842	0.00517428	114.389	0.728571	0.0117646	0.00657102	991.417	0.795045	0.0334054	0.00741068
Gm03_3625536	145.026	0.791814	0.0213343	0.00532167	1978.7	0.708895	0.0660704	0.00518066	99.3967	0.772515	-0.0187401	0.00478546	32.1037	0.72858	0.011649	0.00629333	445.7	0.795075	-0.0405276	0.00699665
Gm03_3660049	69.2838	0.791834	0.0152712	0.00556435	553.301	0.709192	0.0360282	0.00546402	2.74255	0.772542	-0.00323652	0.00483163	1.56174	0.728589	0.00269256	0.00562253	15.6065	0.795203	-0.00788293	0.00646063
Gm03_3738896	1452.36	0.791647	-0.0351584	0.00664086	140.165	0.709296	-0.00942338	0.0054619	36.7686	0.772538	0.00588116	0.00477734	375.444	0.728533	0.0203329	0.0053668	932.443	0.795065	0.030268	0.00703919
Gm03_3792220	122.666	0.791836	-0.0105374	0.00580625	387.477	0.709267	-0.0160741	0.00597261	123.488	0.772524	0.01106	0.00494579	108.058	0.728573	0.0110803	0.00615946	2241.65	0.794854	-0.0481698	0.0073472
Gm03_3835073	111.052	0.791821	0.0200874	0.00554031	89.6205	0.709292	0.0150229	0.00573377	58.8529	0.772525	-0.0156283	0.00459107	10.8929	0.728586	-0.00745206	0.00600447	95.2473	0.795177	-0.020293	0.00648961
Gm03_3851610	109.336	0.791822	0.0198938	0.00522244	108.218	0.709288	0.0164879	0.00614028	48.4187	0.772528	-0.0141465	0.00495447	12.6161	0.728585	-0.00801011	0.00631929	129.6	0.795166	-0.023623	0.00633523
Gm03_3914221	36.8728	0.791847	-0.00734186	0.00521811	140.77	0.709292	0.0121315	0.00632628	28.3913	0.772537	0.0067634	0.0047173	129.572	0.728564	-0.0155042	0.00598984	224.917	0.795163	0.0194613	0.0069965
Gm03_4451625	171.818	0.791814	-0.0198713	0.00487663	8.4227	0.70931	0.00426832	0.00631648	258.247	0.772481	0.0255242	0.00482547	4210.46	0.727579	-0.109884	0.00778165	684.009	0.795036	-0.0424732	0.00713838
Gm03_4495990	0.00397433	0.791854	-6.35769e-05	0.00549989	1190.08	0.709157	-0.0317373	0.00699527	878.355	0.772404	0.0310367	0.00490678	4719.51	0.72785	-0.0759562	0.00704677	152.235	0.795183	-0.0132249	0.00620626
Gm03_4536039	1016.92	0.791611	-0.0492931	0.00527178	1585.96	0.709017	-0.0522752	0.00622423	580.832	0.772401	0.0389728	0.00468279	65.9476	0.728573	-0.0139823	0.00699198	42.3523	0.795197	-0.0107653	0.00606736
Gm03_4631608	414.873	0.791803	-0.0162725	0.00512931	1821.31	0.709135	0.0292088	0.00763253	519.588	0.772477	0.0190907	0.00463289	1547.92	0.728391	-0.0355385	0.00671723	227.202	0.795178	0.0129077	0.00653341
Gm03_4682537	697.128	0.791761	-0.0227931	0.00578604	27.2571	0.709309	0.00383993	0.00708477	665.441	0.772452	0.0234355	0.00513926	2900.74	0.728184	-0.0531257	0.00777654	68.9112	0.795198	0.00770874	0.00633995
Gm03_4855107	5.0173	0.791853	-0.00352845	0.00512604	3525.05	0.708657	-0.0777836	0.00644899	18.7472	0.772538	0.00729487	0.00510682	3.26076	0.728588	0.00338694	0.00674083	766.103	0.795004	-0.0475805	0.0064879
Gm03_4884496	65.1097	0.791838	-0.0122504	0.00519087	3860.12	0.708616	-0.079074	0.00674489	53.9553	0.77253	0.0118922	0.00559732	55.7178	0.728575	0.0133803	0.00648363	764.562	0.795012	-0.0456899	0.00712907
Gm03_4902366	6.91294	0.791852	-0.00419432	0.00552305	2971.94	0.708754	-0.0722648	0.00629632	0.131753	0.772543	-0.000620429	0.00562781	223.16	0.728529	0.0285233	0.00612854	397.42	0.795101	-0.0347654	0.00670726
Gm03_4929284	3.80545	0.791853	0.00224971	0.00536961	2164.69	0.709014	-0.0451129	0.00634914	4785.29	0.771663	-0.0845041	0.00646961	246.984	0.728542	0.0211383	0.0055167	1121.74	0.794991	0.0418226	0.00798139
Gm03_4942947	47.4954	0.791845	-0.00808403	0.00529112	3099.57	0.708879	-0.0548722	0.00624047	3540.9	0.77188	-0.0740104	0.00603778	151.153	0.72856	0.0168544	0.00569543	892.744	0.795032	0.0379761	0.00732711
Gm03_4965977	3.89838	0.791853	0.00312741	0.00523725	3507.48	0.708657	-0.0780071	0.00634285	4.61412	0.772542	-0.00364307	0.0056738	11.1542	0.728586	0.00632097	0.0058523	174.47	0.795161	-0.022859	0.00750673
Gm03_5039578	59.5197	0.791838	0.0131573	0.00508616	4507.25	0.708395	-0.096356	0.00620311	220.624	0.772483	-0.0267562	0.00536153	703.355	0.728395	-0.0515283	0.00670316	1128.54	0.794886	-0.0618146	0.00964183
Gm03_5091314	15.1053	0.791851	0.00509045	0.00510328	647.41	0.70921	0.0283326	0.00720056	3248.68	0.771869	-0.0784614	0.00581668	1491.41	0.728274	0.0574936	0.00641569	4864.42	0.794148	0.09809	0.0108438
Gm03_5106124	366.337	0.791723	0.0441862	0.00485329	705.604	0.709119	-0.0513259	0.00557759	187.386	0.772473	-0.034034	0.0055492	29.1301	0.728578	0.0150879	0.00613908	36.8657	0.795194	-0.0153986	0.00806112
Gm03_5125446	451.955	0.791694	0.0486142	0.00513832	513.915	0.709172	-0.0434282	0.00543811	321.014	0.772424	-0.0440733	0.0055813	125.1	0.72854	0.0308629	0.00634189	25.3263	0.795198	0.01263	0.00859538
Gm03_5142080	856.706	0.791567	0.0633484	0.00505585	299.079	0.709235	-0.0314793	0.00566373	422.524	0.772395	-0.0476654	0.00527563	79.3573	0.72856	0.022992	0.00645665	63.3156	0.795185	-0.0188328	0.00781852
Gm03_5159998	273.99	0.791762	0.0359438	0.0052889	219.774	0.709255	-0.0272329	0.0056823	646.309	0.772317	-0.0590824	0.00526746	120.473	0.728545	0.0283416	0.0072342	12.445	0.795203	-0.00836962	0.00893636
Gm03_5217414	1938.58	0.791572	0.0414873	0.00563444	2121.84	0.709068	-0.0374171	0.00558254	413.012	0.772481	0.020087	0.00586372	1427.84	0.728373	0.0402591	0.00763963	5797.55	0.794301	-0.0768633	0.0111616
Gm03_5239514	366.236	0.791748	0.0358386	0.00561584	695.555	0.709136	-0.0470674	0.00559224	18.4874	0.772537	-0.00857098	0.00478367	1795.14	0.728032	-0.0927385	0.00820653	411.616	0.795078	-0.0412897	0.00851935
Gm03_5276546	0.881122	0.791854	0.00122944	0.00538685	1342.77	0.709085	-0.0437905	0.00647692	45.747	0.772533	-0.009299	0.00496988	4171.73	0.727717	-0.095308	0.00970252	6402.88	0.793817	-0.112281	0.011768
Gm03_5293608	1144.91	0.791631	0.0425952	0.00591522	69.9138	0.709301	0.00950435	0.00577146	2.94036	0.772542	-0.00224875	0.00499966	273.692	0.728535	-0.0230063	0.00665005	556.43	0.795092	0.0316457	0.0127388
Gm03_5356205	6.03411	0.791853	0.00245544	0.00547535	3.378	0.709312	-0.00160062	0.00572376	189.188	0.772513	-0.0143782	0.00492779	89.4253	0.728575	0.0105993	0.00637646	1.96022	0.795208	0.00149679	0.00767049
Gm03_5377238	654.506	0.791665	-0.0478222	0.00591793	2185.29	0.708779	0.0804274	0.00611331	294.518	0.772454	0.0341867	0.00515528	444.997	0.72845	-0.0464237	0.0057246	481.732	0.795056	-0.0446351	0.00790957
Gm03_5410755	384.773	0.791745	-0.0359474	0.00533545	1583.93	0.708934	0.0670722	0.00574335	147.792	0.772499	0.0237043	0.00515314	211.352	0.728525	-0.0312251	0.00585417	281.622	0.795121	-0.0334103	0.00742688
Gm03_5450089	549.767	0.791696	-0.0435356	0.00549456	2366.51	0.708739	0.0830792	0.00569928	162.317	0.772494	0.0252041	0.00539138	361.186	0.728477	-0.0415185	0.00585489	437.135	0.795071	-0.0422244	0.00769197
Gm03_5466033	3.25612	0.791853	-0.00193511	0.00542078	388.335	0.70926	0.0185075	0.00616096	168.96	0.772514	0.0145129	0.0052477	8.04876	0.728588	-0.00336543	0.00625495	804.864	0.795065	0.0324031	0.00868987
Gm03_5521160	31.5871	0.791845	-0.00971646	0.00525918	3635.2	0.708483	0.0970164	0.00613741	3.36845	0.772542	0.00335281	0.00521137	642.776	0.728409	-0.0501786	0.00553749	675.407	0.795013	-0.0484987	0.00710214
Gm03_5707090	8.07852	0.791852	-0.00349048	0.00559369	2817.64	0.708877	0.0578734	0.00638019	555.473	0.772435	0.0302645	0.00599602	850.868	0.728424	-0.0399577	0.00636092	2920.22	0.794614	-0.0709254	0.00828882
Gm03_5730188	1301.43	0.791691	-0.0291465	0.00758334	13180.1	0.707977	0.0821275	0.00768378	348.798	0.772499	0.0156573	0.00651929	364.419	0.728543	-0.0168929	0.00568969	148.705	0.795188	0.0104631	0.00765958
Gm03_5758220	1689.98	0.791589	0.0417086	0.00583042	3355.99	0.708891	-0.051298	0.00681188	1468.21	0.772309	-0.0404378	0.00593031	262.586	0.728548	0.0181214	0.00583078	4844.66	0.794398	-0.0751068	0.00922761
Gm03_5816390	1758.21	0.791589	0.0409085	0.00620362	693.678	0.709228	0.0224742	0.00613516	2574.45	0.772148	-0.0516857	0.00712208	1121.27	0.728416	0.0364502	0.00671815	7.21631	0.795207	-0.00280025	0.00781647
Gm03_5915395	678.183	0.79175	0.0258121	0.00543822	136.42	0.709295	-0.0102438	0.00604379	866.972	0.772407	-0.0305624	0.00554167	967.97	0.728436	0.0347469	0.00564223	446.621	0.795134	-0.0224317	0.00693511
Gm03_6526333	427.455	0.791743	0.0346666	0.00531329	2254.35	0.708854	0.0679894	0.00639722	1.50817	0.772542	-0.0021755	0.00544209	23.3435	0.728583	-0.00927422	0.00556842	1346.1	0.79483	0.0663806	0.00849699
Gm03_6778112	3.67098	0.791853	-0.00323472	0.00526433	547.718	0.709201	-0.0333899	0.00576916	42.6382	0.772531	-0.0116535	0.00514777	43.7441	0.728577	-0.0127997	0.00591225	5.37985	0.795206	-0.00422956	0.00631333
Gm03_6839848	24.0496	0.791847	-0.00930423	0.0051744	524.23	0.709193	0.0365996	0.00546267	46.8119	0.772529	0.0137831	0.00534479	118.289	0.728552	0.0239019	0.00532952	0.0566863	0.795208	-0.000489881	0.00625372
Gm03_7072273	30.1964	0.791845	-0.0106345	0.00502718	111.598	0.709286	0.0171369	0.00586463	28.166	0.772534	0.010945	0.00519143	551.96	0.728412	0.0533179	0.00569043	243.375	0.795129	0.0328456	0.00634505
Gm03_7287339	97.4588	0.791829	0.0164019	0.00513699	192.229	0.709274	-0.0194695	0.00585266	97.0226	0.772517	-0.0172462	0.00513702	396.141	0.728483	0.0375752	0.00602019	1062.45	0.794913	0.0583101	0.0068628
Gm03_7755000	117.926	0.791833	0.0122566	0.0051098	160.591	0.70929	0.0122531	0.00558763	14.3604	0.77254	-0.00448404	0.00495503	76.6179	0.728575	0.011128	0.00538057	57.529	0.795197	-0.00917649	0.00681906
Gm03_7922831	736.269	0.791706	0.0352936	0.00622074	3663.95	0.708733	0.0674747	0.00628359	642.248	0.772411	0.0345263	0.00515668	472.826	0.728491	0.0317118	0.00559536	229.225	0.795158	-0.021095	0.00926134
Gm03_8042001	384.346	0.791755	-0.0325061	0.00580312	1196.95	0.709076	0.04816	0.00573689	60.2146	0.772527	-0.0136703	0.0051671	4.71843	0.728588	-0.00419596	0.00616258	4896.38	0.793846	0.125681	0.00835605
Gm03_8193930	445.132	0.791739	-0.0351895	0.00561212	770.446	0.709159	0.0388041	0.00545688	150.066	0.772503	-0.0217389	0.00523058	9.57924	0.728587	0.00603866	0.005711	5214.21	0.793748	0.130617	0.00802988
Gm03_8310890	284.184	0.791799	0.0210141	0.00588569	166.079	0.709287	0.0137115	0.00551246	162.857	0.772511	-0.0167671	0.00527247	32.0796	0.728583	0.00806114	0.00598785	844.696	0.795032	0.0390183	0.00732038
Gm03_8830782	84.7061	0.791835	0.013082	0.00545874	377.5	0.709248	-0.0231847	0.00560904	1478.07	0.772208	-0.0579079	0.00589604	311.752	0.728516	0.0290528	0.00609941	2541.75	0.794602	0.0775411	0.0075395
Gm03_9107042	21.2174	0.791849	-0.00732665	0.00533249	781.437	0.709164	0.0372777	0.00554093	194.141	0.772493	-0.0235918	0.00563484	336.634	0.7285	0.0342013	0.00590819	3025.24	0.794398	0.0950002	0.00774053
Gm03_10546906	36.6831	0.791842	0.012388	0.00524503	0.0685899	0.709312	-0.000443226	0.00503002	339.568	0.77243	-0.0406079	0.00556161	337.735	0.72847	0.0455876	0.00615932	345.683	0.795087	0.0417881	0.00823304
Gm03_11220135	32.3778	0.791844	0.0116434	0.00516134	0.824322	0.709312	-0.00153695	0.0052735	278.201	0.77245	-0.0367865	0.00543332	283.882	0.728489	0.0418676	0.00602186	278.316	0.795111	0.0375258	0.00793039
Gm03_13427095	0.0493656	0.791854	0.000314836	0.00503497	80.8443	0.709299	-0.0106889	0.00514773	483.071	0.772434	-0.0329952	0.00545701	391.533	0.728498	0.032382	0.00622924	2833.71	0.794535	0.0815747	0.0100618
Gm03_13899407	10.8951	0.79185	-0.00659044	0.00499994	52.671	0.7093	-0.012027	0.00531168	84.5254	0.772516	-0.0197343	0.0053254	301.839	0.728486	0.0417948	0.00615752	88.1141	0.795178	0.0205547	0.00775642
Gm03_19402579	143.033	0.791823	-0.0168833	0.00513483	521.071	0.709224	-0.0272996	0.00538132	265.141	0.772483	-0.0243764	0.00528192	2.26524	0.728589	0.00246923	0.00605675	1490.22	0.794855	-0.0590055	0.00851676
Gm03_19651102	273.246	0.791793	-0.0236187	0.00475284	601.559	0.709209	-0.0295773	0.0053669	208.052	0.772495	-0.0218647	0.00520173	101.46	0.728565	0.0167444	0.0063079	928.659	0.794985	-0.0471705	0.00767475
Gm03_19759044	464.312	0.791751	-0.0308197	0.00470686	511.426	0.709225	-0.0272983	0.00538155	106.794	0.772518	-0.0156848	0.00549437	47.8213	0.728578	0.0115123	0.00662481	1617.1	0.794819	-0.0623086	0.00729424
Gm03_20480845	188.271	0.791808	-0.0215108	0.00489399	547.528	0.70921	0.0309036	0.005783	363.268	0.772452	-0.0317116	0.00545369	1625.09	0.72817	0.0734277	0.00755271	177.769	0.795161	-0.0226588	0.00655006
Gm03_21050357	40.679	0.791842	0.0120489	0.00490081	44.257	0.709302	-0.0104685	0.00553221	582.613	0.772365	-0.0488841	0.00580928	1058.05	0.72825	0.0734575	0.00755171	282.492	0.795117	0.0347376	0.00635215
Gm03_22151357	12.6685	0.79185	0.0071169	0.00506132	101.495	0.709288	-0.0166634	0.00592964	220.21	0.772471	-0.0319535	0.00544393	402.003	0.728451	0.04857	0.00718181	58.5451	0.795188	0.0168059	0.00595475
Gm03_23170776	5.7171	0.791852	-0.00480567	0.00521932	7.50183	0.70931	-0.00455182	0.0059152	216.635	0.772472	-0.0318739	0.00610497	884.638	0.728283	0.0725245	0.00785727	150.517	0.795156	0.0270982	0.00595067
Gm03_30720012	12.2578	0.791852	0.00380348	0.00518477	370.069	0.709264	0.0175354	0.00566071	37.005	0.772536	0.00707038	0.00580624	0.312186	0.728589	-0.00072676	0.00718455	60.0013	0.795197	0.00918757	0.00582339
Gm03_30784763	61.4867	0.791843	0.00858785	0.00502494	559.507	0.709239	0.0216909	0.00572429	20.4407	0.772539	0.00530865	0.00564655	113.241	0.728568	-0.0140461	0.00701429	13.1963	0.795206	0.00435196	0.0056017
Gm03_30901093	23.1742	0.79185	-0.00539433	0.00502053	1302.49	0.709139	0.033796	0.00562124	56.5619	0.772533	0.00906271	0.00566971	20.2637	0.728585	-0.00613638	0.00647096	33.2576	0.795202	0.00708822	0.00588438
Gm03_30985268	375.92	0.79179	-0.0213207	0.00499898	1293.19	0.709143	0.0330766	0.0056935	430.969	0.772466	0.0244968	0.00541896	121.746	0.728566	-0.0146644	0.00630367	1.00961	0.795208	0.00120973	0.00633402
Gm03_31642771	198.072	0.79182	-0.0154659	0.00497799	1421.87	0.709127	0.0346126	0.00583015	97.9363	0.772525	0.0116703	0.00551365	0.551315	0.728589	0.000986005	0.00555559	54.1949	0.795198	0.00885682	0.00648436
Gm03_33298303	613.11	0.791772	0.0213588	0.00517403	41.087	0.709308	0.00468444	0.00586348	1600.02	0.772325	-0.0361796	0.00647582	132.492	0.728571	0.0112113	0.00585509	523.518	0.795133	-0.0211631	0.00706259
Gm03_33948168	254.22	0.791825	0.0115881	0.00499697	985.447	0.709225	0.0194811	0.00598578	0.0281582	0.772543	0.000127256	0.00544229	566.064	0.728524	0.0192661	0.00807355	1362.3	0.795044	-0.0286255	0.00758809
Gm03_35592037	164.423	0.791842	0.00568859	0.00510726	6820.87	0.708938	0.03192	0.00640222	439.968	0.772512	0.00961972	0.00507611	1146.29	0.728511	-0.0163903	0.00627815	109.871	0.7952	0.0049212	0.00759159
Gm03_37489216	2494.51	0.791659	0.0252194	0.00664582	64.3542	0.709308	0.00347547	0.00544562	44.1065	0.772539	-0.00346735	0.00561347	7.14949	0.728589	-0.00147167	0.00599306	12940.5	0.794138	-0.0607185	0.0136666
Gm03_38748510	799.401	0.791777	-0.0176559	0.00588835	262.778	0.709293	-0.00840501	0.00612577	677.865	0.772475	0.0173746	0.00578394	2130.87	0.728363	-0.0345711	0.00778677	896.595	0.795113	0.0203915	0.00796435
Gm03_38778248	335.321	0.791821	-0.0114661	0.00678048	284.501	0.709291	-0.00875944	0.0059799	219.126	0.772521	0.00991094	0.00541422	2124.89	0.728363	-0.0346768	0.00740173	812.977	0.795122	0.0194791	0.00761169
Gm03_38947687	363.708	0.791821	-0.0109501	0.00602724	309.367	0.709291	-0.0084115	0.00574096	470.82	0.7725	0.0132416	0.00579613	338.455	0.728557	-0.0124465	0.00715496	690.717	0.795141	0.0163757	0.00778331
Gm03_39504952	3765.62	0.791568	0.0301077	0.00709523	3854.97	0.709082	0.0261563	0.00901275	910.308	0.772474	-0.0152318	0.00545384	859.536	0.728525	0.0154722	0.00637268	1099.26	0.79512	-0.0171422	0.00627602
Gm03_43348646	81.6601	0.791848	-0.00437459	0.00637052	31.7746	0.70931	0.00237652	0.00660122	46.9101	0.772539	-0.00341657	0.00581195	355.127	0.728563	0.00985595	0.00852943	7925.99	0.794581	-0.0454409	0.00847324
Gm03_44441766	204.025	0.791828	0.0117359	0.00575643	4425.67	0.708873	-0.0466026	0.00731764	1608.13	0.772335	-0.0344732	0.00621421	291.717	0.728551	-0.0157594	0.00574753	642.913	0.79512	-0.0222931	0.00591125
Gm03_44466323	701.939	0.791757	0.0235249	0.00591675	5121.45	0.708764	-0.0540234	0.00848985	2041.62	0.772256	-0.042099	0.00610452	987.226	0.728448	-0.0315853	0.0065633	921.268	0.795072	-0.0289167	0.00611848
Gm03_44519143	4109.81	0.791227	0.0632931	0.00667016	644.467	0.709235	-0.0215318	0.00663112	4506.82	0.771837	-0.06982	0.00659763	796.993	0.728461	0.0320002	0.00581772	693.459	0.795094	-0.0280101	0.0060032
Gm03_44574136	378.172	0.791801	0.0176632	0.00576354	1211.27	0.709178	-0.02712	0.00717419	3246.26	0.772076	-0.054432	0.00674175	374.595	0.728534	0.0201168	0.00556099	2496.15	0.79483	-0.0487889	0.00779752
Gm03_44656663	698.81	0.791746	0.0263243	0.00580936	38.8687	0.709307	0.00535824	0.00802365	1330.62	0.772333	-0.0381715	0.00614003	1744.9	0.728309	0.0472905	0.00607096	179.391	0.795178	-0.0143299	0.0058391
Gm03_44686929	1587	0.791631	0.0362166	0.00633781	4535.17	0.708804	-0.0532127	0.00761492	324.373	0.772496	-0.0171318	0.00607639	78.5331	0.728578	-0.00902138	0.00610877	367.741	0.795153	-0.0186543	0.00587384
Gm03_44760204	1249.63	0.791557	-0.0543553	0.00679814	0.823194	0.709312	0.00117228	0.00723101	684.566	0.772376	0.0422139	0.00741231	115.498	0.728561	0.0184836	0.00574781	57.9566	0.795193	0.0125622	0.00580951
Gm03_44781248	357.487	0.791759	0.0325606	0.0059936	2292.01	0.708847	-0.0684783	0.00703852	1519.58	0.772125	-0.0712024	0.00668249	219.4	0.728527	-0.0295413	0.00558653	11.0669	0.795205	0.00620991	0.00597265
Gm03_44803075	437.115	0.791737	0.0361385	0.00673409	2545.48	0.708794	-0.0724048	0.00679288	1884.9	0.772022	-0.0796243	0.00741624	120.189	0.728555	-0.0219779	0.00584674	17.3011	0.795203	-0.00779677	0.00594882
Gm03_44843014	704.509	0.791603	-0.0612352	0.00558731	66.0123	0.709295	-0.0152776	0.00626338	44.9665	0.772526	-0.0167839	0.00665511	206.863	0.728506	0.0408246	0.00557704	32.2215	0.795195	0.0144829	0.00598687
Gm03_44896150	195.723	0.791783	-0.0329139	0.00569287	40.5356	0.709301	-0.0121834	0.00620465	270.642	0.772439	-0.042067	0.00633643	84.9369	0.728554	0.0268418	0.0056742	52.7764	0.795187	0.0189345	0.00599182
Gm03_44926805	355.507	0.79172	-0.0460629	0.00538024	25.6078	0.709305	-0.0100162	0.00567847	26.2338	0.772532	-0.0136481	0.00610685	23.4085	0.728579	0.0147741	0.00543536	57.6035	0.795184	0.0206047	0.00605406
Gm03_44951608	317.566	0.79173	-0.0449952	0.00524816	120.71	0.709277	-0.0224038	0.00565382	9.0196	0.772539	0.00829897	0.0054565	17.8309	0.728581	0.0134574	0.00569663	28.0642	0.795196	0.0149097	0.00631952
Gm03_45022556	315.334	0.791727	-0.0462244	0.00492421	186.467	0.709257	-0.0286207	0.00582236	32.224	0.772529	0.0162182	0.00538786	20.1977	0.72858	-0.0148876	0.00588656	1.15462	0.795207	-0.003126	0.00627528
Gm03_45040469	443.567	0.791681	-0.0532579	0.00486607	42.3298	0.7093	-0.0132961	0.00581906	15.8879	0.772536	0.0110182	0.00545182	11.8536	0.728584	-0.0109425	0.00598342	26.2001	0.795197	-0.0144128	0.00625254
Gm03_45077667	166.977	0.791787	-0.0336615	0.00488085	14.6534	0.709308	-0.00802542	0.00565954	82.0531	0.772508	0.0259053	0.00580194	85.6286	0.728549	-0.0307016	0.00561082	9.4967	0.795204	0.00897386	0.00555919
Gm03_45121299	17.0551	0.791847	-0.0105921	0.00454603	339.335	0.709213	-0.0380803	0.00563433	2.13967	0.772542	-0.00410854	0.00587735	3.21064	0.728588	0.00580668	0.00600445	74.8458	0.795175	0.0247468	0.00572258
Gm03_45140873	26.9643	0.791843	-0.0134467	0.00500908	4.55604	0.709311	-0.00445157	0.00556994	0.806691	0.772543	0.0025506	0.00587586	2.52464	0.728588	-0.00522171	0.00571357	64.6251	0.795179	0.0232462	0.00558992
Gm03_45165752	7.73808	0.791851	0.00734285	0.00492654	82.8087	0.709287	-0.0193189	0.00517712	10.318	0.772538	-0.00931187	0.00590285	76.6624	0.728553	-0.0294478	0.00585639	40.0065	0.79519	0.0186689	0.00557964
Gm03_45192194	16.2201	0.791847	0.0105641	0.0048251	36.9346	0.709301	-0.0128308	0.00527221	5.90933	0.77254	0.00699698	0.00610473	27.1134	0.728576	-0.0173584	0.00593098	119.667	0.795154	0.0320594	0.00559846
Gm03_45208021	16.2898	0.791847	0.0106272	0.00494843	170.278	0.709261	-0.0276438	0.00492533	0.6682	0.772543	-0.00236282	0.00606325	22.8487	0.728578	-0.0160174	0.00595924	122.455	0.795152	0.0325667	0.0055993
Gm03_45265924	9.81647	0.79185	-0.00806513	0.00514426	513.217	0.709161	-0.0470278	0.00507214	25.6939	0.772532	0.0142632	0.00567786	62.3996	0.728561	-0.0254959	0.00594069	222.413	0.795109	0.0427416	0.00560422
Gm03_45290089	0.84132	0.791853	0.00229446	0.00505051	380.953	0.709203	-0.0394968	0.00489792	33.0479	0.772529	0.0156651	0.00581133	20.8483	0.72858	0.0141826	0.00600596	390.788	0.79504	0.0548792	0.00560741
Gm03_45311413	59.7237	0.791831	-0.0194327	0.00500848	341.791	0.709214	-0.0375888	0.00522631	320.954	0.77241	0.0491024	0.00606102	21.0009	0.72858	0.0143392	0.00576369	592.57	0.794951	0.0679699	0.00621246
Gm03_45324812	27.4156	0.791845	-0.0106451	0.00519473	32.3664	0.709305	-0.00947543	0.00551263	1174.74	0.772157	0.0746765	0.00580198	38.283	0.728576	0.0149446	0.00581641	472.32	0.795045	0.048335	0.00633454
Gm03_45339825	300.773	0.791755	-0.0370039	0.00523697	18.1668	0.709308	-0.00742108	0.0054959	1375.12	0.772067	0.0852154	0.00643324	10.9675	0.728585	0.00851903	0.00581226	452.391	0.795043	0.0498749	0.00664352
Gm03_45362284	407.999	0.791718	-0.0436069	0.00568524	15.4264	0.709308	-0.00691474	0.00545224	1415.58	0.772047	0.08755	0.00702525	107.162	0.72855	0.0270006	0.00613118	223.236	0.795126	0.0354792	0.00751693
Gm03_45385270	649.184	0.791712	0.0360924	0.00545271	926.482	0.709156	0.0360673	0.00583021	1471.32	0.77221	-0.0575851	0.0076445	146.33	0.728555	0.0198705	0.00611382	387.513	0.795116	-0.0301966	0.0073939
Gm03_45413351	1120.38	0.791598	0.049554	0.00654722	85.7252	0.709297	0.0114241	0.00588051	926.776	0.772323	-0.0479885	0.00714091	95.7069	0.728566	0.0170187	0.00650768	75.6158	0.795189	-0.0139994	0.00695015
Gm03_45435101	1492.48	0.791514	0.0569921	0.0059541	75.7858	0.709299	0.0107063	0.00595214	1293.8	0.772237	-0.0564897	0.00669782	9.87121	0.728587	0.00544481	0.00613599	1.08738	0.795208	-0.00167281	0.00665986
Gm03_45490002	49.6188	0.791844	0.00929156	0.00599526	160.285	0.709287	-0.014059	0.00604563	450.474	0.772448	-0.0295857	0.00619462	226.049	0.72854	-0.0228672	0.00714517	179.766	0.795168	-0.0190966	0.00674564
Gm03_45516951	110.811	0.791831	0.0138056	0.00578667	87.7295	0.709298	-0.0103427	0.00647774	531.516	0.772432	-0.031948	0.0060107	66.8776	0.728575	-0.012365	0.00692251	154.056	0.795174	-0.0175751	0.00678592
Gm03_45530607	1312.83	0.791634	0.0393568	0.00576877	783.635	0.709209	-0.025935	0.00745675	1036.04	0.772366	-0.0365094	0.005795	932.59	0.728429	-0.0369854	0.00713323	391.269	0.795138	-0.0229521	0.00774627
Gm03_45735214	505.814	0.791764	0.0259064	0.00576753	860.208	0.709193	0.0285294	0.00762785	482.811	0.772455	-0.0264795	0.00672842	793.781	0.728444	0.0363184	0.00642826	3222.7	0.794593	0.0699182	0.00985301
Gm03_45766679	163.47	0.791827	0.0134525	0.0051082	198.818	0.709287	0.0124705	0.00699106	853.715	0.772401	-0.0322461	0.00678982	35.0354	0.728583	-0.00703618	0.00606463	105.773	0.795189	0.0116065	0.00712366
Gm03_45831119	916.293	0.791693	-0.0343893	0.00538944	1146.86	0.709157	0.0323396	0.00733985	238.604	0.7725	0.018479	0.00590412	2021.31	0.728218	0.0582992	0.00646648	491.903	0.795115	0.0271162	0.00736448
Gm03_45853914	224.601	0.791824	-0.0129504	0.00483457	352.017	0.709273	-0.0145671	0.00845228	3021.49	0.772138	0.0489207	0.00806637	60.3954	0.728581	0.00719942	0.00605034	453.341	0.795144	-0.019415	0.0076403
Gm03_45877087	1359.88	0.791616	-0.0417067	0.00557717	2650.35	0.708956	0.0488242	0.00660193	421.62	0.772467	0.0244189	0.00618271	562.306	0.728487	0.0304727	0.00680353	0.000323013	0.795208	-2.18504e-05	0.00618136
Gm03_46310672	312.256	0.7918	-0.0196809	0.00565866	3540.79	0.708844	0.0555011	0.00784255	0.0239777	0.772543	0.000181103	0.00643799	37.2449	0.728583	0.00763994	0.00596477	450.73	0.795124	-0.0253837	0.00719437
Gm03_46333142	1708.98	0.791503	0.05493	0.0062542	388.626	0.709252	-0.0215778	0.0061633	1548.77	0.772208	-0.0564123	0.0072514	697.584	0.728428	-0.0429131	0.00665894	815.244	0.795023	0.0417455	0.00687947
Gm03_46374133	1422.42	0.791563	0.0499455	0.00595344	184.355	0.709284	-0.0148114	0.00611717	1083.64	0.77231	-0.0470371	0.00648817	631.863	0.728444	-0.0407226	0.00661407	303.782	0.795139	0.0254018	0.00684576
Gm03_46401351	649.084	0.791722	0.0335211	0.00526031	93.1168	0.709298	0.0104751	0.00577059	2989.56	0.771906	-0.0773695	0.00699345	0.72426	0.728589	-0.00135959	0.00635605	1278.62	0.794922	0.0516341	0.00743751
Gm03_46417886	452.11	0.791763	0.0277764	0.00561713	92.5917	0.709298	0.0103752	0.00545477	2305.28	0.772055	-0.0674303	0.00739352	15.07	0.728586	-0.00614779	0.00689177	1259.99	0.794928	0.0508646	0.00719231
Gm03_46431532	16.2334	0.79185	0.0055191	0.00520898	60.5045	0.709303	-0.0087409	0.00525555	142.847	0.772511	0.017729	0.00708314	1096.83	0.728326	-0.0560163	0.00698891	258.394	0.795147	-0.0243064	0.00713288
Gm03_46446195	48.5942	0.791843	0.00967962	0.00548389	0.548894	0.709312	0.00084355	0.00551199	13.4683	0.77254	0.00552308	0.00656373	1242.82	0.728286	-0.0605944	0.00756748	349.625	0.795125	-0.0286811	0.00678503
Gm03_46461438	5.8833	0.791853	0.00332583	0.00555438	35.531	0.709306	0.00670953	0.00613897	51.7007	0.772531	0.0106707	0.00576317	641.209	0.728435	-0.0428094	0.00689661	504.629	0.79509	-0.0339815	0.00670738
Gm03_46533591	1550.24	0.791583	0.0445083	0.00704141	5.64497	0.709311	-0.00224748	0.00661335	818.842	0.772395	-0.03439	0.00607925	110.967	0.728568	-0.0139333	0.00650438	2423.4	0.794747	-0.0603931	0.00788648
Gm03_46553110	989.532	0.7917	0.0315458	0.00626803	463.965	0.709256	0.0182327	0.00638099	359.842	0.772486	-0.0200259	0.005094	389.828	0.728526	0.0225104	0.00660364	102.463	0.795191	-0.0109233	0.00644152
Gm03_47063583	372.676	0.791784	-0.0233194	0.00731264	1109.94	0.709154	0.0333592	0.0070011	85.1651	0.772526	-0.0119692	0.00536815	20.147	0.728585	0.00649935	0.00626928	0.466035	0.795208	0.00090338	0.00648535
Gm03_47103413	5.40134	0.791853	-0.00268314	0.00610573	2429.28	0.708982	0.0472466	0.00665936	292.433	0.772488	-0.0211486	0.0051653	326.96	0.728525	0.0248673	0.00568687	3.32829	0.795207	0.00230258	0.00635565
Gm03_47234236	1404.18	0.791623	0.0399323	0.00760756	1827.54	0.709079	0.0384589	0.00682305	516.698	0.772455	-0.02557	0.00545273	114.124	0.72857	0.0129983	0.00547964	528.063	0.795114	0.0264162	0.006898
Gm03_47251052	389.803	0.791779	-0.024428	0.00595928	3541.42	0.708801	0.0605943	0.00708842	79.465	0.772527	-0.0119257	0.00517116	97.9713	0.728568	0.0150167	0.00538019	67.8397	0.795194	0.0112347	0.00592426
Gm03_47293766	354.777	0.791787	-0.0230447	0.00611819	3751.96	0.708778	0.0615355	0.00690844	141.063	0.772515	0.0157503	0.00522539	0.0274089	0.728589	-0.000250466	0.0052393	13.6358	0.795205	0.00499173	0.00633462
Gm03_47381196	5.08482	0.791853	-0.00221006	0.00552007	446.105	0.70926	0.0174283	0.0081438	439.176	0.772474	0.0217239	0.00512921	528.555	0.728504	0.0260095	0.00607411	260.833	0.795165	-0.0171046	0.00703368
Gm03_47394801	986.524	0.791699	-0.0318584	0.00510599	239.897	0.709283	0.0131541	0.00785994	615.607	0.772443	0.0267793	0.00475183	388.501	0.728524	0.0234813	0.00589215	126.556	0.795186	-0.0123991	0.00655689
Gm03_47528196	22.2495	0.79185	0.00536742	0.0048898	3149.53	0.708894	0.0525422	0.00800712	155.963	0.772514	0.015351	0.00518166	4.01265	0.728588	-0.0027958	0.00617555	711.337	0.79507	0.033423	0.00765381
Gm03_47581821	64.4525	0.791843	-0.00881249	0.00444476	4825.66	0.708692	0.0630188	0.00846565	349.621	0.772481	0.0221064	0.00475024	242.409	0.728543	0.0207842	0.00624407	462.701	0.795121	0.0259369	0.00699705
Gm03_47691142	51.5198	0.791845	-0.00759911	0.00442769	5100.97	0.708677	0.0627314	0.00787042	515.763	0.772455	0.025751	0.00484031	196.539	0.728554	0.0177221	0.00622854	342.425	0.795147	0.0214123	0.00703952
Gm04_1911175	1015.54	0.791792	-0.01256	0.00431749	136.574	0.709306	-0.00390267	0.00795104	4716.82	0.77225	0.028354	0.00599674	780.57	0.72854	-0.0124866	0.00721669	9650.03	0.794577	-0.0414467	0.0104677
Gm04_2571383	88.9422	0.791845	0.00587066	0.00445805	94.451	0.709305	-0.0051589	0.00824691	1013.73	0.772444	0.0205261	0.00496022	7988.28	0.72782	0.060702	0.0123224	4298.84	0.794768	0.0432457	0.00878234
Gm04_2704672	77.4382	0.791849	-0.00364811	0.00499111	1641.19	0.709228	0.0146582	0.00638193	483.175	0.772511	-0.00952764	0.00741425	25.1248	0.728588	-0.00234006	0.00671906	1273	0.79512	-0.0158133	0.00841076
Gm04_5146439	363.825	0.79181	0.0150029	0.00495322	2777.83	0.709051	0.034952	0.00637312	511.464	0.772479	0.0186829	0.00569659	786.264	0.72849	-0.0250488	0.00767788	470.49	0.795146	0.0183176	0.00861384
Gm04_5169217	636.49	0.791777	0.0196007	0.00517361	1162.73	0.709205	0.0222415	0.00651344	66.637	0.772535	0.00669663	0.0057512	693.405	0.728501	-0.0236115	0.0076198	10151	0.793892	0.0843094	0.0109685
Gm04_5248901	282.243	0.791819	-0.0134776	0.00542658	4894.89	0.708846	0.0469383	0.00671129	4080.35	0.772021	0.0542364	0.00757101	1234.27	0.728426	-0.0328417	0.0064224	3511.39	0.794736	0.0513954	0.00774158
Gm04_5256916	24.4104	0.791851	-0.00415785	0.00531163	13008.6	0.708014	0.0803609	0.00882261	2558.16	0.7722	0.0450322	0.00780156	1258.7	0.728415	-0.0347224	0.00625808	2639.08	0.794836	0.0467203	0.00744119
Gm04_5837752	567.095	0.791772	-0.0223294	0.00509492	726.429	0.709229	-0.0217862	0.00662057	78.7675	0.772531	0.00889775	0.00659167	32.7437	0.728584	0.00637905	0.00594088	170.763	0.795181	0.0133712	0.00706323
Gm04_5841524	454.924	0.791788	-0.020035	0.00527207	877.485	0.709211	-0.0239889	0.00710624	9.63909	0.772541	0.0031185	0.00659688	49.2829	0.728581	0.00784266	0.00606758	108.326	0.795191	0.0106698	0.00606931
Gm04_5947935	245.493	0.79181	0.018198	0.00532976	2269.93	0.709004	-0.0455394	0.00775614	1115.77	0.772329	-0.0424812	0.0069153	144.933	0.728559	0.0178902	0.00578737	72.6975	0.795193	-0.0110446	0.00586616
Gm04_5992236	239.489	0.791811	0.0180214	0.0054057	2362.25	0.708991	-0.0465612	0.00652627	1179.88	0.772316	-0.0438146	0.00609816	190.925	0.728549	0.0206108	0.00569753	189.798	0.79517	-0.0178979	0.00570541
Gm04_5997443	314.884	0.791797	0.0206739	0.00525177	2082.78	0.709029	-0.0437418	0.00640093	1106.43	0.77233	-0.0424549	0.00582737	157.813	0.728556	0.0187547	0.00556163	128.762	0.795182	-0.0147507	0.00549887
Gm04_6010633	534.02	0.79176	0.0262837	0.00509018	2283.63	0.709009	-0.0447919	0.00648715	2071.3	0.772155	-0.056575	0.00554583	124.99	0.728564	0.016183	0.00558616	6.3055	0.795207	0.00318068	0.00557546
Gm04_6017565	334.254	0.791794	0.0212647	0.00485184	1612.78	0.709093	-0.038437	0.00689564	1315.58	0.77229	-0.046206	0.0053049	250.062	0.728536	0.0235539	0.00501082	30.8461	0.795202	-0.00720665	0.00554053
Gm04_6026664	189.953	0.79182	0.01597	0.00470509	2070.64	0.709032	-0.0434243	0.0075593	900.936	0.772371	-0.0380593	0.00508765	240.853	0.728539	0.0229566	0.00503165	25.7744	0.795203	-0.00655688	0.00570265
Gm04_6053827	1.537	0.791853	0.00177346	0.00474558	466.839	0.709235	0.0250461	0.00746298	9.5774	0.772541	-0.00489501	0.00509686	82.0942	0.728567	0.0169761	0.00540347	76.0544	0.795189	-0.014034	0.00544439
Gm04_6056943	1.537	0.791853	0.00177346	0.00479994	466.839	0.709235	0.0250461	0.00721623	9.5774	0.772541	-0.00489501	0.004941	82.0942	0.728567	0.0169761	0.00542568	76.0544	0.795189	-0.014034	0.00550412
Gm04_6064289	0.608715	0.791854	-0.00112454	0.00473947	820.341	0.709177	0.0333775	0.00650961	0.374435	0.772543	-0.000977248	0.0049363	108.659	0.72856	0.0197864	0.00570865	50.2769	0.795195	-0.0115187	0.00545982
Gm04_6069571	2.46036	0.791853	-0.00227762	0.00485359	705.559	0.709195	0.031149	0.00601533	21.0481	0.772538	0.00738661	0.00467783	2.551	0.728589	-0.00306755	0.00581423	36.6679	0.795199	-0.00991652	0.0057107
Gm04_6074896	43.9033	0.791844	0.00943696	0.00509878	557.498	0.709221	0.0271916	0.00571234	10.1472	0.77254	-0.00501969	0.00476065	1.01323	0.728589	-0.00188344	0.00589077	21.4484	0.795203	-0.00742458	0.00590453
Gm04_6079629	2.61568	0.791853	-0.00234481	0.00505976	718.039	0.709193	0.0314045	0.00550381	0.76527	0.772543	-0.00140638	0.0048647	28.0613	0.728582	0.0101503	0.00604258	95.1382	0.795184	-0.0159491	0.00588654
Gm04_6086675	17.4523	0.79185	-0.00607259	0.00539373	497.558	0.709229	0.026182	0.00559381	3.69807	0.772542	0.0030996	0.0050776	53.8189	0.728575	0.0141059	0.00593599	35.8115	0.795199	-0.00981077	0.00587683
Gm04_6092519	2.21412	0.791853	-0.00216587	0.00541304	764.216	0.709185	0.032478	0.00581995	3.54313	0.772542	0.00303855	0.00556927	87.8325	0.728565	0.0180544	0.0059068	72.9264	0.795189	-0.0140209	0.00571511
Gm04_6103946	1.76961	0.791853	0.0019005	0.00627185	503.546	0.70923	0.0259345	0.0057983	39.113	0.772534	-0.00988188	0.00619604	117.932	0.728558	0.0203569	0.00617227	0.00833878	0.795208	0.000146799	0.00582697
Gm04_6115381	3.63155	0.791853	-0.00271402	0.00670519	508.458	0.709229	0.0259768	0.00605885	30.4376	0.772536	-0.00868942	0.00760323	103.544	0.728562	0.0190118	0.00615523	5.04325e-05	0.795208	-1.13798e-05	0.00612068
Gm04_6895999	5054.29	0.791371	0.0439617	0.00759563	1236.12	0.70922	0.018551	0.00625094	1485.9	0.772397	-0.0251013	0.00801086	384.437	0.72855	-0.0139321	0.00652671	2878.22	0.794911	-0.0356963	0.00702765
Gm04_6904567	6654.81	0.79122	0.0503036	0.00766539	1503.3	0.7092	0.0204178	0.00598017	2094.79	0.772338	-0.0297236	0.00834941	190.78	0.72857	-0.00978908	0.00733151	2607.01	0.79494	-0.0338854	0.00694572
Gm04_8184443	10855.5	0.791046	0.0502338	0.00743866	5984.03	0.708953	-0.0327197	0.0076504	27583.2	0.770473	-0.0829341	0.0167982	1249.48	0.728495	0.0187739	0.0109682	3278	0.794948	0.0293271	0.00983304
Gm04_8346507	93.8031	0.791845	0.00587299	0.00639963	1547.77	0.709198	-0.0204663	0.00596359	92.8869	0.772534	-0.00604686	0.0079471	3654.81	0.728247	-0.0399624	0.00932852	358.519	0.795172	-0.0121604	0.00797576
Gm04_11262744	173.078	0.791834	-0.00968096	0.00587621	525.603	0.709266	0.0143353	0.00500104	2155.2	0.772293	0.0357962	0.00849013	7553.91	0.7277	-0.0722021	0.0109698	10624.9	0.793912	-0.0811569	0.011542
Gm04_18306789	80.8787	0.791843	0.00746292	0.00534065	971.047	0.709216	0.021725	0.00544931	649.895	0.772457	0.022365	0.00678258	16007.5	0.726415	-0.121503	0.0132728	3978.27	0.794656	-0.0564953	0.0101853
Gm04_29519988	401.637	0.791776	-0.0252688	0.00506688	1041.95	0.709156	0.0340556	0.00501093	37.0119	0.772535	-0.00821988	0.00542784	33.0625	0.728582	0.00871791	0.0111048	2340.06	0.794708	0.066649	0.0107812
Gm04_29528518	201.161	0.791815	-0.0176848	0.00481151	930.528	0.709174	0.031809	0.00457742	74.311	0.772528	-0.0115152	0.00503624	67.5568	0.728575	0.0123169	0.0114025	2819.84	0.794613	0.0723275	0.0112473
Gm04_29528926	235.213	0.791809	-0.0190955	0.00468636	1037.65	0.709159	0.0335415	0.00469346	46.9483	0.772533	-0.00913888	0.00476567	48.6151	0.728579	0.0104306	0.00989332	2789.54	0.79462	0.071829	0.0105113
Gm04_30604409	340.283	0.791806	-0.0168937	0.00453526	38.7048	0.709308	0.00480522	0.00487129	1695.54	0.772297	0.0396571	0.00455243	6974.34	0.727558	-0.0872046	0.0105809	9602.4	0.793747	-0.0963139	0.0144509
Gm04_31890261	960.344	0.791724	0.0271114	0.00507168	2197.53	0.709083	0.0344256	0.00530345	1.04766	0.772543	0.000949266	0.00436746	10013.6	0.727142	-0.102183	0.0122613	8031.4	0.794031	-0.0847616	0.0127489
Gm04_41491701	6.73279	0.791849	0.0114991	0.00468812	111.527	0.709255	-0.0383062	0.00479722	39.6213	0.772514	-0.0299833	0.00425329	2.3115	0.728587	-0.00805502	0.00810263	0.241846	0.795208	0.00239017	0.0101072
Gm04_41503310	4.10065	0.791851	0.00907154	0.00501678	90.1181	0.709265	-0.0347917	0.00493056	43.5045	0.772511	-0.0317728	0.00436355	8.87457	0.728582	0.0159689	0.00785345	0.216936	0.795208	0.0022892	0.00924614
Gm04_41524112	109.013	0.791774	0.0493068	0.00495008	104.344	0.709255	-0.0392911	0.00500439	38.334	0.772513	-0.0316138	0.00425849	0.95023	0.728588	0.0055968	0.00704767	0.0111107	0.795208	-0.000548861	0.00807376
Gm04_41529791	26.3208	0.791834	0.024622	0.00524526	91.7236	0.709261	-0.0373307	0.00549859	3.53586	0.77254	-0.00977327	0.00473205	23.4983	0.72857	0.02836	0.00631422	8.77396	0.795201	-0.0156967	0.00710218
Gm04_41536443	0.123955	0.791854	-0.00171823	0.00541892	173.695	0.709215	-0.0522156	0.00520367	0.00206939	0.772543	-0.000240898	0.00472346	1.0762	0.728588	0.00622041	0.00592768	0.089315	0.795208	0.0016133	0.00669936
Gm04_41539349	41.2092	0.791825	0.0288698	0.0051739	0.220483	0.709312	-0.00172695	0.00532723	5.92556	0.772539	0.0117872	0.0045606	0.380983	0.728589	0.0033361	0.00572755	0.528156	0.795208	0.00358994	0.00575257
Gm04_41543901	1.91339	0.791852	-0.00707612	0.00528702	135.557	0.709233	-0.0481629	0.00546321	26.3726	0.772521	0.0286235	0.00470436	2.50432	0.728587	-0.0100617	0.0052095	15.8834	0.795194	-0.0226357	0.00643716
Gm04_41570906	29.7223	0.79183	0.0282137	0.00497319	5.12581	0.709309	-0.00950139	0.00534989	25.1971	0.772521	-0.0283339	0.00477554	4.43752	0.728585	0.0135888	0.00528911	73.3861	0.795143	0.0492659	0.00580732
Gm04_41577190	0.786162	0.791853	0.00462791	0.00498577	30.876	0.709294	0.0234814	0.00540375	3.72871	0.77254	-0.0110167	0.00452898	15.8031	0.728575	-0.0260447	0.00528151	1.39035	0.795207	0.0068529	0.00588053
Gm04_41582214	0.181565	0.791854	-0.00226529	0.00502062	81.7885	0.709262	-0.0388754	0.00539355	21.4281	0.772524	0.0269366	0.00478065	77.2547	0.728516	-0.0588661	0.00582025	19.3801	0.79519	-0.0260923	0.00556036
Gm04_41585144	0.143597	0.791854	-0.0020493	0.00527926	89.1792	0.709257	-0.0411898	0.00545631	69.0446	0.772481	0.0492598	0.00456717	53.1042	0.728538	-0.0497615	0.00553653	16.8179	0.795192	-0.0247605	0.00592922
Gm04_41591549	13.6571	0.791842	0.0199887	0.00527818	6.50643	0.709308	-0.0111287	0.00569942	46.517	0.772501	0.0404409	0.00449142	123.373	0.72847	-0.0758809	0.00536136	32.6866	0.795177	-0.0345245	0.00549656
Gm04_41595058	7.74662	0.791847	0.0150761	0.00527638	3.17517	0.70931	-0.00778122	0.00583226	0.500726	0.772542	0.00420529	0.00463263	4.60159	0.728585	-0.0147093	0.00543418	12.3425	0.795196	-0.0212608	0.00577556
Gm04_41602821	5.54716	0.791849	-0.0126974	0.00539715	4.82539	0.709309	-0.0095513	0.00555596	42.9768	0.772505	0.0387443	0.00482936	40.0347	0.728551	-0.0430858	0.00547751	47.8658	0.795163	-0.0416409	0.00603696
Gm04_41613416	82.8183	0.791788	0.0465273	0.00519928	158.278	0.709219	-0.0521262	0.00589784	4.68725	0.772539	-0.0120678	0.00476967	24.2077	0.728567	-0.0312724	0.00524372	38.3252	0.795174	-0.0351597	0.0057544
Gm04_41616426	7.11915	0.791848	0.0148585	0.00518129	42.214	0.709285	-0.0290933	0.00577202	1.04299	0.772542	0.0062573	0.00477603	15.1785	0.728574	-0.0276846	0.0054706	27.335	0.795182	-0.0326109	0.0058675
Gm04_41622529	0.190526	0.791854	-0.00238299	0.00506172	63.8071	0.709272	-0.0351576	0.00566053	31.5695	0.772514	0.0336421	0.0047771	149.989	0.728442	-0.0845215	0.00545099	57.1604	0.795154	-0.0460986	0.00595518
Gm04_41628019	3.42689	0.791851	0.0101714	0.00484281	51.9844	0.709279	-0.031941	0.00563795	5.74722	0.772538	0.0144699	0.00497968	10.2242	0.728579	-0.0223668	0.00566607	71.9605	0.795139	-0.0521298	0.00567877
Gm04_41706134	29.2873	0.791827	0.032399	0.00500545	0.0396509	0.709312	0.000951412	0.00529714	0.0148843	0.772543	-0.000807762	0.00477212	25.9014	0.728561	-0.0394736	0.00568714	95.6686	0.795108	-0.0658905	0.00588219
Gm04_41713124	141.576	0.79174	-0.0617398	0.00504826	11.355	0.709305	0.0142851	0.00489858	114.279	0.772446	0.060285	0.00510514	86.471	0.728511	-0.0593577	0.00570114	0.0123827	0.795208	-0.000639711	0.00588956
Gm04_41729447	30.6633	0.791826	0.0322964	0.00492979	20.2466	0.709299	0.0209965	0.00517878	0.0145378	0.772543	0.000775366	0.00483684	1.36451	0.728588	-0.00874905	0.00576018	10.7455	0.795197	-0.0214568	0.00612424
Gm04_41733332	83.1252	0.791783	0.0504943	0.00517512	38.1053	0.709288	0.0274651	0.00506952	43.9209	0.772503	-0.0402171	0.00492653	0.747627	0.728588	0.00602619	0.00559498	42.8145	0.795167	-0.0404415	0.00566891
Gm04_41749366	63.663	0.791797	0.0458783	0.00518485	12.1531	0.709304	0.0161949	0.00542756	0.469898	0.772542	0.00433263	0.00508002	0.00796388	0.728589	-0.000652635	0.00550114	16.4369	0.795192	-0.0260904	0.00576242
Gm04_41753781	138.448	0.791725	0.0710955	0.00495185	6.63682	0.709308	-0.0124191	0.00552079	2.5743	0.77254	-0.0107268	0.00473837	6.79987	0.728582	-0.0204372	0.00558666	1.50826	0.795206	-0.0083548	0.0057078
Gm04_41777973	6.92709	0.791847	0.0159344	0.00508377	18.9304	0.709299	0.0210037	0.00552216	7.95028	0.772535	0.0188986	0.00479348	99.3715	0.728478	0.0784307	0.00550652	82.3473	0.795121	-0.0618799	0.00569977
Gm04_41788055	0.39519	0.791853	0.00368126	0.00500762	9.79943	0.709306	0.0146589	0.00534408	72.7498	0.772472	0.0549947	0.00459442	26.7125	0.728561	0.0385903	0.00582607	37.5057	0.79517	-0.0402001	0.005329
Gm04_41799470	161.689	0.791712	0.0724244	0.00484644	3.14249	0.70931	-0.00810138	0.00550007	0.80585	0.772542	0.00562022	0.00474514	45.5115	0.728542	0.0488682	0.00583318	83.6438	0.795125	-0.058295	0.00587505
Gm04_41802203	1.27189	0.791853	0.00631844	0.00468921	113.968	0.709239	0.0481191	0.00546801	6.24772	0.772537	-0.0153397	0.00485886	66.3144	0.728523	0.0574529	0.00560105	70.4046	0.79514	-0.0524437	0.00557205
Gm04_41842394	0.936504	0.791853	0.00576845	0.00507009	15.531	0.709302	0.0187796	0.00531008	6.2426	0.772537	0.01644	0.00489546	167.149	0.728407	0.0992497	0.00561921	60.3197	0.795145	-0.0520079	0.00550133
Gm04_41876926	1.63472	0.791852	-0.00768556	0.00500157	4.27348	0.709309	0.00991915	0.00544282	29.914	0.772513	0.0363503	0.00466355	125.506	0.728451	0.0871725	0.00524005	55.9158	0.795149	-0.0505714	0.00570295
Gm04_41887275	6.63406	0.791848	-0.0156855	0.00502842	133.439	0.70922	0.0561224	0.00567787	40.3988	0.772502	0.0428212	0.00438628	97.4568	0.72848	0.0779526	0.00507292	9.14697	0.795198	-0.0207343	0.00566606
Gm04_41894390	0.0583081	0.791854	-0.00147453	0.00511451	102.634	0.709241	0.049314	0.00568322	54.1113	0.772488	0.0497171	0.00465479	0.343896	0.728589	0.00464871	0.0052178	103.047	0.795098	-0.069805	0.00569796
Gm04_41936031	52.271	0.791803	-0.0450395	0.0048235	69.5678	0.709263	0.0414077	0.00555857	163.261	0.772373	0.0882657	0.00456779	114.389	0.728457	0.0870069	0.00571914	28.3505	0.795177	-0.0374256	0.00545521
Gm04_41938833	5.3008	0.791849	-0.0137015	0.00514276	150.399	0.70921	0.0584355	0.0059179	134.15	0.77241	0.0759989	0.00439233	65.5846	0.728518	0.0618955	0.00594138	58.152	0.795148	-0.0509365	0.0057603
Gm04_41946783	15.2263	0.791839	-0.0237136	0.00474319	47.9536	0.709279	0.0336099	0.00587018	157.7	0.772383	0.0844104	0.00450879	48.848	0.728535	0.0550697	0.00595267	1.60312	0.795206	-0.00866188	0.00562452
Gm04_41966191	15.5167	0.791839	-0.0240084	0.00472856	46.2421	0.70928	0.0330981	0.00572948	164.896	0.772375	0.0865659	0.00467237	0.363466	0.728589	0.00476302	0.00605464	41.1009	0.795164	-0.0439845	0.00560996
Gm04_41986089	19.9306	0.791835	-0.0274528	0.00501545	52.0328	0.709276	0.0353847	0.00577711	162.931	0.772376	0.0869522	0.00465493	50.1259	0.728532	0.0567169	0.00587417	24.1594	0.795182	-0.0340719	0.00562589
Gm04_41994764	0.485778	0.791853	-0.00421319	0.00488316	92.7287	0.709249	0.0465226	0.00595351	105.562	0.772437	0.0686364	0.00459398	17.655	0.72857	0.0328377	0.00564832	20.1326	0.795187	-0.030507	0.00571248
Gm04_41998572	12.5808	0.791842	-0.0215011	0.00508376	184.873	0.709185	0.06586	0.00544173	170.81	0.77237	0.0875501	0.00472868	44.2444	0.72854	0.0521366	0.005481	19.3416	0.795188	-0.0299868	0.00567634
Gm04_42015773	10.1849	0.791844	-0.0197463	0.00496776	46.7662	0.709279	0.0337394	0.00530035	120.747	0.772418	0.0753546	0.00460578	66.0449	0.728514	0.065572	0.00540101	85.1582	0.795116	-0.0643848	0.00636904
Gm04_42021208	16.2636	0.791838	-0.0247922	0.00482302	93.4565	0.709247	0.0474126	0.00530795	130.905	0.772409	0.077907	0.00467053	28.3927	0.728557	0.0426432	0.00547951	123.676	0.795075	-0.0770458	0.00609717
Gm04_42041427	2.93041	0.791851	0.0095595	0.00492602	1.04317	0.709311	0.00458349	0.00528411	105.615	0.772446	0.0628325	0.00473952	43.2253	0.728546	0.0460619	0.00555599	53.8851	0.795156	-0.0457164	0.00653448
Gm04_42050181	9.02534	0.791845	-0.0178982	0.00492374	157.073	0.709206	0.0596947	0.00541235	83.97	0.77246	0.0601706	0.00466336	82.6303	0.7285	0.0692146	0.00559944	73.4587	0.795132	-0.0572883	0.00652241
Gm04_42055877	2.89099	0.791852	0.0077459	0.00495992	114.226	0.709252	-0.0395092	0.00546393	39.744	0.772513	0.0311942	0.00450191	0.315602	0.728589	0.00315352	0.00587857	465.479	0.794844	0.108765	0.00667127
Gm04_42078816	0.399103	0.791853	0.00280951	0.0049904	138.045	0.709241	-0.0424786	0.0053071	48.0212	0.772508	0.0333997	0.00471856	3.85941	0.728586	0.0106988	0.0057206	385.229	0.794915	0.0964092	0.00659205
Gm04_42084069	54.1995	0.791815	-0.0337268	0.00480335	0.076121	0.709312	0.00102548	0.0050058	147.152	0.772433	0.0603671	0.00473651	5.54702	0.728585	0.0133001	0.00544078	490.012	0.794823	0.11224	0.00644469
Gm04_42089505	1.17896	0.791853	-0.00518245	0.0050179	27.6832	0.709297	-0.0202916	0.0049931	65.0975	0.772492	0.0420185	0.00474356	24.3415	0.728569	-0.0294108	0.00564414	388.27	0.794889	0.104514	0.00641096
Gm04_42102621	14.495	0.791843	-0.0178489	0.00512311	9.45746	0.709307	-0.0116697	0.0051804	43.7466	0.772509	0.0337625	0.00472562	13.8522	0.728578	0.0216548	0.00557473	351.663	0.794924	0.0975152	0.00647348
Gm04_42109928	2.44769	0.791852	0.00674651	0.00528889	24.7556	0.7093	-0.0174859	0.00530261	89.6851	0.77248	0.0441081	0.00470493	0.119365	0.728589	-0.00180695	0.00530657	387.344	0.794923	0.0934543	0.00646249
Gm04_42122049	40.8097	0.791816	-0.0380453	0.00504448	50.0798	0.709278	0.0337925	0.00545367	214.704	0.772331	0.0961369	0.00511817	6.82878	0.728582	0.0198693	0.00564103	23.0209	0.795184	-0.032053	0.00776414
Gm04_42143195	10.8643	0.791846	0.0150606	0.00522412	115.066	0.709251	-0.0399768	0.00523753	6.21928	0.772538	0.0123915	0.00483035	14.0768	0.728578	-0.0212098	0.00560266	806.827	0.794575	0.143725	0.00670357
Gm04_42153008	14.0569	0.791844	0.017234	0.00485194	129.798	0.709244	-0.0424612	0.00541965	21.4467	0.772527	0.0231741	0.00484316	23.2932	0.72857	-0.0275369	0.00566297	565.353	0.794761	0.121181	0.00675683
Gm04_42155858	43.2983	0.791823	0.0303254	0.0050945	15.1083	0.709304	-0.0145295	0.00545467	1.53034	0.772542	-0.00620362	0.00494856	80.1436	0.728524	0.0511072	0.00583465	569.203	0.794757	0.121856	0.00664018
Gm04_42167627	1.11643	0.791853	0.00463802	0.00523668	56.3277	0.709283	-0.0269447	0.00522279	21.9669	0.772527	0.0222887	0.00456832	0.310707	0.728589	0.00299385	0.00574197	327.822	0.794962	0.0877566	0.00643399
Gm04_42175357	0.138701	0.791854	0.00148438	0.00512233	45.9303	0.709291	-0.0222849	0.00523102	27.9803	0.772525	0.0225849	0.00500274	0.943634	0.728589	-0.00457694	0.00613469	430.764	0.794917	0.0904101	0.00644843
Gm04_42192608	34.3854	0.791832	0.0236785	0.00506929	111.765	0.709259	-0.0356594	0.00550185	11.4257	0.772535	0.0146559	0.00463173	362.248	0.728344	0.0909169	0.0060543	560.063	0.794824	0.104651	0.00609723
Gm04_42203141	88.6614	0.791791	0.0428958	0.00505287	13.0586	0.709305	0.0133446	0.00519852	8.8084	0.772536	-0.0147008	0.00462017	33.9129	0.728562	0.0327402	0.00578936	774.687	0.794602	0.140401	0.00580919
Gm04_42209595	194.265	0.791716	0.0641726	0.00510223	0.781601	0.709312	0.00329839	0.00534595	0.879734	0.772542	-0.00470233	0.00463549	1.51511	0.728588	0.00702245	0.00585714	905.067	0.794492	0.153557	0.00620803
Gm04_42212704	164.476	0.791736	0.0593032	0.00473628	3.39892	0.70931	0.00690462	0.0052935	0.0758343	0.772543	-0.0013872	0.00468385	0.48938	0.728589	0.00401391	0.00587339	730.384	0.794627	0.13862	0.00584881
Gm04_42217004	237.09	0.791691	0.0684941	0.00470897	0.0515049	0.709312	0.000820734	0.00522558	31.3257	0.77252	-0.027002	0.00472611	1.30862	0.728588	0.00623355	0.00558082	1114.89	0.794359	0.164044	0.00606869
Gm04_42223379	181.996	0.791729	0.0600345	0.00478443	24.6814	0.709299	-0.0179733	0.00534156	22.6127	0.772526	-0.0229531	0.00486314	19.7605	0.728574	0.0242438	0.00597288	976.944	0.794464	0.153655	0.00629001
Gm04_42228863	194.643	0.791721	0.0618206	0.00488067	9.59536	0.709307	-0.0111643	0.00534211	24.8748	0.772525	-0.0239599	0.00495619	12.6355	0.728579	0.0192778	0.00555569	1005.85	0.794445	0.155177	0.00631182
Gm04_42232479	198.467	0.791718	0.0625034	0.00496521	22.6222	0.709301	-0.0171667	0.00564982	33.1238	0.772519	-0.0276752	0.00487809	65.3932	0.728539	0.0438664	0.00575913	1057.66	0.794405	0.159273	0.00666618
Gm04_42242171	325.703	0.791702	-0.0543778	0.0060707	57.7093	0.709292	-0.0190907	0.00584562	155.309	0.772469	0.0394158	0.00532063	44.9403	0.728568	0.022587	0.00608082	84.9496	0.795165	0.0298094	0.0068139
Gm04_42250744	35.23	0.791841	0.0142371	0.00517498	902.572	0.709054	-0.0606279	0.0060387	53.9019	0.772523	0.0184168	0.00532328	119.866	0.728544	0.0292277	0.00593821	144.09	0.795151	-0.0307964	0.00747353
Gm04_42259460	45.7519	0.791837	0.016012	0.00509015	1054.83	0.709014	-0.0647187	0.00595506	59.4074	0.772521	0.019061	0.00595434	5.47231	0.728587	-0.00614305	0.00596999	104.47	0.795167	-0.025855	0.00701288
Gm04_42276569	45.2864	0.791839	0.0145449	0.00520169	1410.95	0.708947	-0.0686374	0.0065577	34.396	0.772531	0.0132417	0.00648501	11.8609	0.728585	0.00827387	0.00586895	448.85	0.795047	0.0489196	0.00754326
Gm04_42281965	56.3399	0.791835	0.0161995	0.0051294	1787.44	0.70885	-0.077147	0.00665517	16.9591	0.772537	0.00928332	0.0067647	0.208614	0.728589	0.00109518	0.00637581	251.198	0.795118	0.0365422	0.0068799
Gm04_42294494	351.512	0.791749	-0.0361689	0.00549069	1726.66	0.708921	0.0664061	0.00686728	905.686	0.772262	-0.0619612	0.00696269	17.2454	0.728584	-0.00952488	0.00630639	19.1071	0.795202	-0.00918951	0.00637875
Gm04_42297232	232.938	0.791785	-0.0293251	0.00520187	1670.81	0.708935	0.0651028	0.00613821	1163.43	0.772184	-0.0699199	0.00678675	3.76171	0.728588	-0.00442788	0.00589443	11.924	0.795204	-0.00722868	0.00721235
Gm04_42301692	201.916	0.791796	-0.0264676	0.00517387	1023.14	0.709088	0.0494334	0.00614393	719.127	0.772328	-0.0532712	0.00613059	127.314	0.728549	-0.0249443	0.00636981	8.01739	0.795205	0.0057433	0.00662757
Gm04_42343983	135.346	0.791816	-0.0209061	0.00524518	675.004	0.709169	0.0387849	0.00659433	479.489	0.772405	-0.04194	0.0061545	23.3714	0.728582	-0.0102964	0.00597476	36.2151	0.795197	0.0117684	0.0065045
Gm04_42347093	151.908	0.79181	-0.022873	0.00495134	1684.76	0.708945	0.0631255	0.00625691	718.297	0.772328	-0.0531277	0.00580592	6.05924	0.728587	0.00545128	0.0058194	13.9329	0.795204	0.00755396	0.00687992
Gm04_42362325	303.733	0.791779	-0.0278585	0.00535345	24.8674	0.709307	0.00666373	0.00612557	426.49	0.772434	-0.035004	0.00556992	199.396	0.728536	-0.0263464	0.00610253	1644.73	0.794767	0.0701788	0.00785379
Gm04_42365585	275.019	0.791777	-0.0298929	0.00562256	1819.69	0.708926	0.0638256	0.00714851	600.725	0.772369	-0.0471055	0.00515122	32.2201	0.728579	0.0121402	0.005204	0.325849	0.795208	0.00112017	0.00622822
Gm04_42380851	148.53	0.791812	-0.0220763	0.00611499	1613.51	0.708968	0.0603975	0.00671825	744.633	0.772326	-0.052698	0.00480457	88.1085	0.728562	0.0201722	0.00553278	4.4197	0.795207	0.00414559	0.00648802
Gm04_46273755	428.714	0.791782	0.022289	0.00663778	4600.12	0.708734	-0.060143	0.00730479	150.379	0.772517	-0.0142489	0.00496682	154.41	0.72856	0.0163778	0.00519146	265.037	0.795159	-0.0192888	0.00722063
Gm04_46292835	164.588	0.791826	0.0139011	0.00632109	4466.82	0.708747	-0.0596287	0.00791484	81.8981	0.772528	-0.0105893	0.00480037	59.0452	0.728578	0.0102098	0.00547483	211.3	0.795169	-0.0173429	0.00652414
Gm04_46332898	616.346	0.79175	0.0271564	0.00662237	2341.4	0.709013	-0.0436073	0.00721467	132.042	0.772519	-0.0135945	0.00504086	179.104	0.728555	0.018027	0.00534473	0.18927	0.795208	-0.000524753	0.00648693
Gm04_46360308	172.788	0.791824	0.0145393	0.00682506	1469.27	0.709123	-0.0348732	0.00686286	114.556	0.772522	-0.0128125	0.00583854	314.85	0.728528	0.0242129	0.00532774	78.8986	0.795193	-0.01084	0.00681426
Gm04_46387846	8.78463	0.791852	-0.00320383	0.0072337	588.698	0.709237	0.0218509	0.00907182	0.996771	0.772543	-0.00115246	0.00601833	1.34193	0.728589	-0.00148236	0.00567968	1836.47	0.794873	-0.0504738	0.00788026
Gm04_46551160	2724.95	0.791342	0.0635221	0.00679234	575.151	0.70923	-0.0240504	0.00678986	343.895	0.772475	-0.0243885	0.00641389	7.20854	0.728588	-0.00400413	0.00559284	51.5484	0.795197	-0.00962867	0.00670102
Gm04_46570148	2434.24	0.791396	0.0600883	0.00711005	510.953	0.709239	-0.0226886	0.00643857	225.611	0.772498	-0.0197689	0.00679248	46.7628	0.728579	-0.0102053	0.00572542	54.6613	0.795197	-0.00992241	0.00653036
Gm04_46577137	2459.09	0.791383	0.0614244	0.00662561	3041.6	0.708872	-0.0562419	0.00704881	3812.26	0.771774	-0.0826749	0.00828241	115.461	0.728564	0.0163519	0.00544998	85.2205	0.79519	0.012615	0.00715058
Gm04_46584339	2729.8	0.791328	0.0651686	0.00684044	2689.09	0.708921	-0.0531906	0.0070324	3987.69	0.771733	-0.0851967	0.0068792	113.378	0.728565	0.0163444	0.00558187	88.6169	0.795189	0.0129614	0.00721379
Gm04_46662168	141.137	0.791831	0.0125377	0.00688457	96.2294	0.7093	0.00863667	0.00620877	263.187	0.772498	-0.0182649	0.00590402	181.129	0.728557	0.0167978	0.00593569	47.4558	0.7952	-0.00791781	0.00735735
Gm04_46738842	603.193	0.791757	0.0254833	0.0066574	20.0324	0.70931	-0.003884	0.00601959	384.29	0.772479	-0.0216258	0.00572922	31.7622	0.728584	-0.00684662	0.00603581	112.434	0.795188	-0.0119458	0.00857838
Gm04_47341754	13825	0.790659	0.0658607	0.00968127	3590.5	0.709064	0.0292273	0.00735269	1882.55	0.772379	-0.0250593	0.00498001	7273.44	0.727967	0.0514404	0.00860073	10149.5	0.794279	0.0595314	0.0149205
Gm04_47604613	4.35252	0.791852	0.00475251	0.00624883	301.013	0.709232	0.0323688	0.00593765	391.406	0.772398	-0.0486818	0.00477203	77.1442	0.728559	0.0243372	0.00614255	25.2234	0.795198	-0.0126048	0.00741161
Gm04_47613112	103.295	0.79182	-0.0215442	0.0062569	378.019	0.709219	0.0339032	0.0061188	30.0788	0.772533	-0.0125507	0.00511446	8.40842	0.728586	-0.00747597	0.00641985	162.863	0.795149	-0.0297816	0.00752861
Gm04_47637092	57.0341	0.791832	-0.0186958	0.00552584	91.5085	0.709286	0.019252	0.00582288	29.4416	0.772531	-0.0146475	0.0050958	66.4086	0.72856	-0.0252137	0.00616706	154.198	0.795142	-0.0341523	0.0068497
Gm04_47641909	190.689	0.791786	-0.0315836	0.00537272	3.49509	0.709311	-0.00349928	0.00563151	20.9822	0.772535	-0.0113327	0.00549487	371.824	0.728442	-0.0538136	0.00601915	15.6093	0.795202	0.00996691	0.00648383
Gm04_47645572	598.343	0.791649	-0.0542683	0.00516431	189.756	0.709263	0.0250483	0.00552072	179.909	0.772478	0.0322925	0.00549395	288.332	0.728477	-0.0465101	0.00617523	188.265	0.795136	-0.0336724	0.00650259
Gm04_47650166	556.905	0.791663	-0.0523729	0.00533369	244.373	0.709249	0.0284284	0.00570167	142.921	0.772491	0.0287986	0.00554041	342.852	0.728456	-0.0507704	0.00597023	169.712	0.795143	-0.0319874	0.00600463
Gm04_47677424	39.8541	0.791837	-0.0171494	0.00556943	293.452	0.709221	0.0375144	0.00525328	4.16474	0.772541	-0.00610081	0.00530854	78.2365	0.728551	-0.0308384	0.00576042	32.6991	0.795193	-0.0174022	0.00603828
Gm04_47681584	3.24362	0.791852	-0.0047495	0.00604996	164.545	0.709262	0.0275501	0.00530659	1.37253	0.772542	-0.00338641	0.00558152	397.79	0.728401	-0.0666669	0.00554058	18.821	0.795199	-0.0127707	0.00624737
Gm04_47704992	7.40138	0.791851	0.00736702	0.00579443	392.17	0.709191	0.0432684	0.00547275	127.043	0.772486	-0.0335461	0.0053545	147.255	0.728517	-0.04201	0.00547754	28.2686	0.795195	-0.0161118	0.00615824
Gm04_47741063	292.867	0.791749	-0.039629	0.00567207	410.197	0.709202	0.0383244	0.00543002	86.2066	0.77251	0.0233783	0.00558106	79.9719	0.728557	-0.0256965	0.00553269	230.565	0.795116	-0.0389623	0.00632146
Gm04_47745090	749.577	0.791579	-0.065092	0.00567409	772.84	0.7091	0.0538647	0.00535453	230.101	0.772453	0.0393501	0.00579682	279.489	0.728471	-0.0498114	0.0055342	95.5182	0.795169	-0.0258321	0.00638086
Gm04_47762442	0.911798	0.791853	-0.00260271	0.00557413	106.448	0.709279	0.02276	0.0056565	101.706	0.772497	-0.0302418	0.00590301	1.4826	0.728588	-0.00425366	0.00559279	59.6647	0.79518	-0.0235813	0.006141
Gm04_47784850	316.879	0.791736	-0.0426466	0.00570751	513.761	0.70917	0.0441966	0.00565751	4.84502	0.772541	0.0057553	0.00607629	23.6778	0.728579	-0.0146153	0.0055578	15.6938	0.795202	-0.0105529	0.00571657
Gm04_47793967	10.3	0.791849	0.00903472	0.00564953	0.0565952	0.709312	-0.00053786	0.00569128	428.091	0.772342	-0.0643023	0.00597736	3.69316	0.728587	-0.00701079	0.00541454	23.9701	0.795196	0.0154886	0.00615147
Gm04_47810327	266.704	0.791742	0.0442331	0.00561537	5.66391	0.70931	-0.00519783	0.00559084	819.527	0.772176	-0.0851778	0.00654479	75.175	0.728552	0.029992	0.00548338	2.68789	0.795207	-0.00496902	0.00595178
Gm04_47822236	18.7027	0.791846	0.0120155	0.00570388	0.250531	0.709312	-0.00112281	0.00557224	573.713	0.772278	-0.0733423	0.0068428	12.7539	0.728583	0.0127942	0.00545126	12.635	0.795202	0.0110821	0.00584663
Gm04_47831972	90.3185	0.791817	0.0253594	0.00568356	155.622	0.709264	0.0269593	0.00573194	702.727	0.772233	-0.077618	0.00681971	53.0953	0.728564	0.0247451	0.00514864	4.69529	0.795206	0.00646301	0.00599959
Gm04_47835062	23.4845	0.791844	0.0134917	0.00534761	20.7459	0.709306	0.0102361	0.00571789	586.973	0.772271	-0.0743649	0.00714137	6.44477	0.728586	0.00912464	0.00526926	8.15976	0.795204	0.00892712	0.00569598
Gm04_47901054	475.84	0.791699	-0.0458324	0.00565007	172.385	0.70927	0.0227842	0.00561583	1304.55	0.772097	0.0819643	0.0073982	41.9559	0.728574	0.0165891	0.00568969	81.4639	0.795179	0.020898	0.0058612
Gm04_47906805	7.27488	0.791851	-0.00684767	0.00554857	0.115495	0.709312	-0.000698584	0.00551003	38.8015	0.772527	0.0173328	0.00625313	72.6372	0.728556	0.02746	0.00539788	454.013	0.795009	0.0603657	0.00602852
Gm04_47912336	361.752	0.791734	-0.0408419	0.00573972	179.86	0.709267	0.0236497	0.00557849	689.35	0.772301	0.0610456	0.00631223	10.7994	0.728585	-0.00866126	0.00544688	112.872	0.795166	0.0251905	0.0056767
Gm04_47915344	17.3131	0.791847	-0.0105527	0.00600029	3.60393	0.709311	-0.00389887	0.0056132	31.9478	0.77253	0.0157082	0.00589766	55.5604	0.728564	0.0239765	0.00572566	470.984	0.795001	0.0614081	0.00577379
Gm04_47929265	11.2667	0.791849	-0.00850677	0.00601	5.06465	0.709311	-0.00461867	0.00564432	19.589	0.772535	0.0122919	0.00567163	12.1918	0.728584	0.0112257	0.00553322	542.234	0.79497	0.0658414	0.00546537
Gm04_47932533	596.952	0.791658	-0.0519884	0.00612945	130.71	0.70928	0.0200381	0.00573533	610.453	0.772331	0.0568669	0.00646675	22.9119	0.728581	-0.01246	0.00601786	158	0.79515	0.0295049	0.00590728
Gm04_47937367	0.844954	0.791853	-0.00227292	0.00525133	67.6518	0.709293	-0.0165575	0.00555003	4.39772	0.772541	-0.00566656	0.00547235	1.36289	0.728589	0.00363198	0.00580621	167.831	0.795136	0.0356564	0.00576364
Gm04_47950862	40.7516	0.791839	0.0153466	0.0052425	336.439	0.709218	-0.0360347	0.00546085	4.26084	0.772541	-0.00540612	0.00568828	51.6999	0.728567	-0.0215449	0.00568948	273.21	0.795095	0.0441051	0.00598876
Gm04_47957800	26.4307	0.791844	0.0124811	0.00547394	176.818	0.709262	-0.0263631	0.00609875	0.282128	0.772543	0.00140621	0.00528078	19.7194	0.728581	-0.0134779	0.00583724	253.243	0.795102	0.0429201	0.00587513
Gm04_48007717	27.5806	0.791849	0.00575668	0.00561149	25.8367	0.709309	0.00470717	0.00567856	98.5636	0.772526	-0.0114382	0.0051141	40.152	0.728582	0.00788345	0.00589367	280.341	0.795157	-0.0197185	0.00564764
Gm04_48017543	149.903	0.791829	0.013248	0.00526326	59.4167	0.709304	-0.0070524	0.00568163	489.537	0.772459	-0.0251437	0.00556435	148.269	0.728563	0.0149207	0.00598843	0.278919	0.795208	-0.000613626	0.00574443
Gm04_48074333	480.138	0.791778	0.02235	0.00563994	1803.06	0.70909	0.0368002	0.00730499	1370.59	0.772323	-0.0394934	0.00590577	1626.49	0.728326	0.0459785	0.00692437	390.567	0.795142	-0.0215654	0.00582828
Gm04_48124739	7744.88	0.790454	0.103165	0.00655066	22.7157	0.709309	0.00475807	0.00611817	6915.73	0.771276	-0.101264	0.00777773	2887.75	0.728066	0.0687447	0.00749972	383.684	0.795134	0.0244492	0.00678708
Gm04_48154841	1191.65	0.791661	0.0361437	0.0052046	4668.58	0.708719	-0.0612606	0.00627716	61.7796	0.772532	0.00878787	0.00602845	179.771	0.728557	-0.0167391	0.0065039	783.093	0.795069	-0.031929	0.00650827
Gm04_48176602	1327.74	0.791639	0.0381632	0.00525282	4828.89	0.708698	-0.0623101	0.00692666	28.912	0.772538	0.00601504	0.00555268	212.395	0.728552	-0.018214	0.00656877	713.976	0.795082	-0.0305037	0.00612716
Gm04_48201147	1083.15	0.79168	0.0341622	0.00479358	5747.98	0.708589	-0.067318	0.00689942	12.0743	0.772541	0.00385088	0.00552167	357.456	0.728526	-0.0233934	0.00678727	512.66	0.795118	-0.0256088	0.00628644
Gm04_48203971	985.254	0.791696	0.0324387	0.00487485	5643.69	0.708605	-0.0664031	0.00709308	7.20203	0.772542	0.00296008	0.00509929	267.533	0.728543	-0.0201304	0.00561999	559.207	0.79511	-0.0266204	0.00593983
Gm04_48662379	51.3801	0.791845	0.00791139	0.0053553	25.6204	0.709309	0.00468556	0.00712928	397.253	0.772473	0.0233449	0.00529254	335.3	0.728528	-0.0235157	0.00575527	98.8334	0.79519	0.0118936	0.00635834
Gm04_48779873	645.998	0.791736	0.0299172	0.00560299	108.294	0.709297	-0.0101331	0.00628485	107.116	0.772522	-0.0131747	0.00508552	388.781	0.728509	0.0285922	0.00595426	495.503	0.795108	0.0288861	0.00626761
Gm04_48826249	222.792	0.791812	0.0183229	0.0055637	28.4013	0.709308	0.00536871	0.00635261	14.7133	0.77254	-0.0051228	0.0052577	23.4812	0.728584	-0.00746927	0.00558416	223.761	0.795161	0.0203543	0.00637982
Gm04_48857149	157.339	0.791824	0.0153912	0.00594415	54.4947	0.709304	0.00743281	0.00590322	6.22505	0.772542	-0.00333097	0.00482225	17.8004	0.728585	0.00650249	0.00574159	16.8668	0.795204	0.00558657	0.00599277
Gm04_48861848	100.416	0.791835	0.0123177	0.00626505	35.3851	0.709307	0.00599916	0.00587661	2.28548	0.772542	-0.00202236	0.00478385	4.52752	0.728588	-0.00328775	0.00596987	4.96198	0.795207	0.00303611	0.00572981
Gm04_48868298	99.9245	0.791835	0.0122546	0.00621372	27.1911	0.709308	0.00524524	0.00593058	6.83085	0.772542	-0.00348657	0.00487069	3.8386	0.728588	-0.00301837	0.00611472	1.61378	0.795208	0.00172667	0.00539505
Gm04_49046928	2289.7	0.791588	-0.0359083	0.00687065	2979.22	0.70904	-0.0352006	0.00722548	0.000439476	0.772543	1.64573e-05	0.00448777	2281.14	0.728317	0.0401184	0.00847873	293.327	0.795171	0.0137498	0.00574608
Gm04_49149436	3543.76	0.791357	-0.0540311	0.00626435	19.9026	0.70931	0.00343121	0.0058714	0.446739	0.772543	0.000641483	0.00464688	3790.62	0.728027	-0.0643799	0.00781199	537.727	0.795126	-0.0227369	0.00610261
Gm05_389226	25.8437	0.79185	0.00420042	0.00529688	9.8445	0.709311	0.00223779	0.00606361	181.298	0.772519	0.0116756	0.00464542	3844.11	0.728079	-0.058096	0.00716048	1898.95	0.794947	-0.0386186	0.00590017
Gm05_419473	4.69938	0.791853	0.00182321	0.00511251	0.01755	0.709312	-9.61697e-05	0.00585012	106.961	0.772529	0.00913629	0.0046867	2741.43	0.728218	-0.0500652	0.00804972	1430.39	0.795008	-0.0341455	0.00628081
Gm05_545441	1464.24	0.791615	0.0403712	0.00595134	332.364	0.709269	-0.0166252	0.00596567	255.121	0.7725	-0.0177311	0.00487122	360.345	0.728528	-0.0227919	0.00749996	159.568	0.79518	0.0143338	0.00665064
Gm05_605301	416.669	0.791787	0.0212603	0.00505003	2896.81	0.708935	-0.0494115	0.00620561	45.3721	0.772535	-0.00742672	0.00509088	113.243	0.72857	0.0128196	0.00753856	687.441	0.795088	0.0295277	0.00648084
Gm05_620109	3.69153	0.791853	-0.00224469	0.00525364	2356.16	0.70898	-0.0482049	0.00599635	181.093	0.772509	-0.0167816	0.00519146	753.593	0.728441	0.0380521	0.00810853	0.528237	0.795208	-0.000925207	0.00616107
Gm05_657420	48.1288	0.791845	0.00857251	0.00474014	898.618	0.709179	-0.0313362	0.00588269	233.817	0.772496	-0.0202334	0.00508331	517.088	0.728481	0.0336519	0.00713475	163.465	0.795174	0.017264	0.00581963
Gm05_721406	284.468	0.791797	0.0216085	0.00467977	275.38	0.70927	-0.0179083	0.00578657	288.994	0.772483	-0.0233621	0.00545937	258.936	0.728533	0.0248181	0.00713497	217.877	0.795161	0.0206968	0.00581691
Gm05_749213	131.72	0.791827	0.0148313	0.00502298	0.294663	0.709312	-0.000590726	0.00554317	564.198	0.772425	-0.0328889	0.00548216	1637.52	0.72823	0.0626505	0.00734062	94.6072	0.795187	0.013744	0.0058902
Gm05_765761	40.7848	0.791846	0.00834174	0.00496924	75.0164	0.7093	-0.00952675	0.00564118	500.558	0.772437	-0.0313558	0.00543242	2140.97	0.728112	0.0727972	0.00799713	406.332	0.795118	0.0288235	0.00600407
Gm05_858948	134.157	0.79183	-0.0132457	0.00502763	82.6375	0.709301	0.0088515	0.00539495	1553.23	0.772261	-0.047557	0.00586414	1777.38	0.728259	0.0552567	0.00746432	668.731	0.79508	0.0318937	0.00588446
Gm05_914933	76.4846	0.791839	0.0106406	0.00507403	218.251	0.709279	0.0157801	0.00559469	528.911	0.772441	-0.0293998	0.00547081	308.657	0.728529	0.0241672	0.00797757	3150.04	0.79457	0.0732987	0.00608661
Gm05_947487	38.5886	0.791846	-0.00757483	0.00507089	695.456	0.709206	0.0283203	0.00583145	183.764	0.772507	-0.017376	0.00580283	3.54769	0.728589	0.00260008	0.00695297	1890.25	0.794824	0.0569441	0.00587968
Gm05_974695	50.3311	0.791844	-0.00904842	0.00543999	1260.82	0.709113	0.0395661	0.00586559	290.119	0.772484	-0.02278	0.0056943	324.725	0.728523	0.0257954	0.00720992	1268.42	0.794939	0.0486913	0.00579747
Gm05_1067468	958.611	0.791676	0.037239	0.00561571	1621.72	0.709066	0.0430812	0.00555845	746.156	0.772402	-0.0343232	0.00560277	188.498	0.728553	-0.0183524	0.00744845	2820.69	0.794646	0.0682236	0.0059214
Gm05_1118742	1045.13	0.791659	0.0390342	0.00559504	1415.46	0.709096	0.0404703	0.00573182	474.628	0.772453	-0.0274931	0.00557706	535.09	0.728487	-0.0311039	0.00743339	2098.21	0.794788	0.0591003	0.00586473
Gm05_1139506	108.708	0.791825	0.0181461	0.00540687	0.300138	0.709312	0.000808924	0.00597374	179.397	0.772493	-0.02473	0.00534783	785.354	0.728366	0.056255	0.00804855	1731.34	0.794702	0.0784304	0.0057131
Gm05_1151541	79.804	0.791832	0.0158044	0.00547742	23.5874	0.709307	0.00729152	0.00574697	123.845	0.772508	-0.0209131	0.00534819	616.731	0.72841	0.050963	0.00726057	1250.58	0.794836	0.0678464	0.00626492
Gm05_1214264	1073.69	0.791595	-0.0511074	0.00558047	1342.58	0.709029	0.0544647	0.00566496	96.0918	0.772519	0.0160826	0.00542368	358.231	0.7285	-0.0332028	0.00730365	1190.1	0.794899	0.0578416	0.00673655
Gm05_1232289	1480.08	0.791387	-0.0785123	0.00589306	1095.32	0.709048	0.0562616	0.00588284	8.02215	0.77254	0.00620727	0.00504102	297.186	0.728487	0.0420036	0.00720045	1010.82	0.794858	0.0710675	0.00656017
Gm05_1257748	672.858	0.791652	-0.0503902	0.00517016	357.09	0.709231	0.0303972	0.0057593	94.9015	0.772513	-0.0203401	0.00549951	238.906	0.72851	0.0360763	0.00633771	882.264	0.794917	0.0632521	0.00629722
Gm05_1278221	242.179	0.791782	-0.0296896	0.00520358	468.686	0.709207	0.0342291	0.00569812	143.457	0.772499	-0.0245158	0.00579318	156.785	0.728538	0.0285678	0.00618523	990.764	0.794887	0.0657184	0.00655244
Gm05_1323684	379.406	0.791739	-0.0380976	0.00532926	0.108229	0.709312	-0.00053158	0.00598604	10.374	0.77254	0.00678043	0.00534526	35.0332	0.728577	0.0139737	0.00617496	555.645	0.795023	0.0506084	0.00705972
Gm05_1348387	152.053	0.79181	-0.0227891	0.00495269	60.2778	0.709299	0.0118988	0.00676403	1.40035	0.772542	0.00234108	0.00571363	127.019	0.72855	0.0247453	0.00571656	176.319	0.795153	0.0268089	0.00779302
Gm05_1375497	85.8462	0.791828	-0.0178625	0.00501063	102.808	0.709289	-0.016139	0.00658957	17.6678	0.772537	-0.00871243	0.00585121	5.94827	0.728587	-0.00565822	0.00586736	0.00171412	0.795208	-8.75495e-05	0.00729018
Gm05_1429125	0.100688	0.791854	0.000608789	0.00490814	4.14692	0.709311	-0.00322869	0.00722127	55.0737	0.772526	-0.0153013	0.00579354	55.6532	0.728571	-0.0171995	0.0058065	17.5242	0.795202	-0.008806	0.00763733
Gm05_1458440	1003.95	0.791685	-0.0344453	0.00495961	12480	0.707682	-0.103072	0.0123424	1057.73	0.772362	0.0369448	0.00601128	85.6435	0.728575	0.0111928	0.00598235	2164.64	0.794818	-0.0540439	0.012835
Gm05_1470752	22.1221	0.791847	-0.00989246	0.00472398	11.0085	0.709309	-0.00573938	0.00775496	364.661	0.772418	0.0434375	0.00548841	9.61991	0.728586	-0.00797853	0.00547394	18.8781	0.795201	0.0100788	0.00813719
Gm05_1504855	46.9486	0.791839	0.0141714	0.00475495	4.02249	0.709311	-0.00341795	0.00861643	61.0468	0.772522	0.0174562	0.00541273	28.8763	0.728579	-0.0135418	0.00598737	437.272	0.795054	0.0476338	0.00763601
Gm05_1533692	111.672	0.791818	0.0219127	0.00505667	0.034698	0.709312	-0.000318341	0.00854656	77.3385	0.772517	0.019696	0.00527549	94.0319	0.728556	-0.0244854	0.00609723	85.5349	0.795178	0.0211229	0.00862467
Gm05_1560320	51.2679	0.791844	0.00848336	0.00498456	7463.92	0.708249	-0.08687	0.0109437	721.373	0.772408	0.0333144	0.00590735	127.439	0.728565	0.014983	0.00736428	476.983	0.795114	-0.0277047	0.00701473
Gm05_1578945	15.6026	0.79185	-0.00683296	0.00493161	1194.16	0.709069	0.0496881	0.00747112	6.0843	0.772541	0.00455354	0.005344	56.8017	0.728573	0.0153395	0.00647587	25.0292	0.795201	0.00942879	0.0076807
Gm05_1600254	20.1403	0.791849	-0.00697271	0.00490529	498.995	0.709221	0.028865	0.00717627	127.608	0.772511	-0.0187413	0.00597989	24.0236	0.728583	0.00899899	0.00628962	772.14	0.795005	-0.0470503	0.00728449
Gm05_1674539	48.7209	0.791842	-0.0106838	0.00505577	1601.91	0.709024	0.0506992	0.00699302	39.6746	0.772533	-0.0103895	0.00539612	140.877	0.728552	-0.022147	0.00639809	3046.87	0.794414	-0.0927637	0.00725303
Gm05_1685477	583.623	0.791731	0.0329074	0.00517182	1231.04	0.709113	0.0401136	0.00597248	130.689	0.772514	-0.0165696	0.00546743	104.745	0.728565	0.0163632	0.00649758	1735.08	0.79481	-0.0616198	0.00620846
Gm05_1713262	24.6742	0.791848	-0.00744638	0.00476995	914.318	0.709151	0.0376374	0.00588367	22.4027	0.772537	-0.00763507	0.00511842	390.939	0.728488	-0.0359757	0.00616704	1892.36	0.794726	-0.0715325	0.00627806
Gm05_1725311	201.131	0.791808	-0.0209004	0.00479636	1341.75	0.709079	0.0448674	0.0055663	25.7638	0.772537	-0.00804036	0.00515461	299.181	0.728514	-0.0308417	0.00590077	2338.7	0.794623	-0.0780885	0.00624238
Gm05_1741634	380.281	0.791769	-0.0280546	0.00464227	723.023	0.709189	0.0321742	0.00552471	0.880444	0.772543	-0.00144774	0.00511328	2.01339	0.728589	0.00245098	0.00565435	2175.2	0.794677	-0.0733737	0.00619115
Gm05_1775530	66.9001	0.791839	-0.0117341	0.00459574	988.385	0.709145	0.0375738	0.00580082	0.541456	0.772543	-0.00113128	0.00523565	31.6525	0.728581	-0.00967918	0.00551795	1914.59	0.794743	-0.0686028	0.006047
Gm05_2580345	84.2991	0.791846	-0.00573851	0.00493184	3048.81	0.709081	0.0295374	0.00622778	143.984	0.772529	0.00783719	0.00544098	975.423	0.728492	-0.0218802	0.00569037	964.739	0.795108	0.0207452	0.00607375
Gm05_3013498	0.00136999	0.791854	2.52111e-05	0.00502368	2507.61	0.709107	0.0289101	0.0066134	3.11485	0.772543	0.00127106	0.00543716	120.984	0.728576	0.0086887	0.00649293	967.587	0.795098	0.0228827	0.00662489
Gm05_3142840	14.2879	0.791852	-0.00261824	0.00556528	5365.4	0.708867	0.0428542	0.00858538	639.841	0.772472	-0.018532	0.00603703	12.8358	0.728588	0.00287842	0.00648911	173.217	0.795188	0.00985089	0.00558227
Gm05_3221696	3292.85	0.791582	-0.0306138	0.00707561	2457.01	0.709153	-0.0226267	0.00727113	1738.69	0.772397	0.0231721	0.00766206	6478.5	0.728046	-0.0476191	0.00950385	8.66248	0.795207	0.00167362	0.00561029
Gm05_3480235	151.077	0.791834	0.0104741	0.00627159	3878.39	0.708911	-0.0454025	0.00739625	916.307	0.772419	-0.0271839	0.00694659	2640.81	0.728224	0.050166	0.00765007	0.0071041	0.795208	7.73637e-05	0.00592107
Gm05_3493714	150.548	0.791838	-0.00825244	0.00615345	678.361	0.709257	-0.014823	0.00702199	31.0891	0.77254	0.00394658	0.00761483	14.8413	0.728588	-0.00295424	0.00778529	603.422	0.79514	0.0177699	0.00595926
Gm05_3649256	2651.33	0.791498	0.0447937	0.00762457	2729.27	0.709027	-0.0384306	0.00657772	5341.29	0.7718	-0.0674921	0.00987881	7817.48	0.727461	0.0901263	0.0113075	33.9578	0.795203	0.00550071	0.0057512
Gm05_3661638	2217.38	0.791556	0.0409351	0.00591409	2473.56	0.709054	-0.0365628	0.00659513	5038.27	0.771843	-0.0654949	0.0096339	7864.11	0.727455	0.0902924	0.00857023	42.3604	0.795202	0.00613826	0.0058171
Gm05_4190784	102.033	0.791844	0.00656051	0.00583328	2708.21	0.709102	0.02844	0.00802917	244.431	0.772518	0.010733	0.00736012	639.076	0.728521	-0.0189206	0.00850502	490.238	0.795155	-0.0155296	0.00628552
Gm05_4362586	31.1858	0.791851	0.00374251	0.0058416	627.354	0.709262	0.0140525	0.00803821	220.833	0.772519	0.010585	0.00658448	282.417	0.728558	-0.0131864	0.00785375	3575.5	0.794805	-0.0434733	0.00650603
Gm05_4637527	2492.57	0.791565	0.0374691	0.00551612	295.055	0.709286	-0.0107183	0.00728368	91.9321	0.772532	0.00770858	0.00658547	1824.07	0.728357	0.0382754	0.00640659	889.489	0.795095	-0.0244656	0.00646432
Gm05_4758925	1431.55	0.791681	0.0294929	0.00516822	5127.83	0.708846	-0.0458732	0.00880807	229.469	0.772514	0.0128131	0.005989	405.61	0.728533	0.0195645	0.00640747	21.1817	0.795205	0.00396762	0.00624812
Gm05_4794423	1466.69	0.791678	0.0297949	0.00494629	5024.2	0.708857	-0.0453232	0.00897813	342.45	0.772499	0.0156206	0.00598481	403.724	0.728534	0.0194754	0.0062671	5.74096	0.795207	-0.0020614	0.00575023
Gm05_4834423	1866.55	0.791631	0.0334426	0.00535477	4730.25	0.708885	-0.0437816	0.0080811	275.682	0.772508	0.0139368	0.00548698	523.409	0.728518	0.0220202	0.00610008	18.4014	0.795206	-0.00367007	0.00552636
Gm05_5727289	84.3491	0.791848	0.00406089	0.00484594	2359.73	0.709184	0.0185805	0.00970827	2591.64	0.772364	-0.023301	0.00709784	1992.74	0.728452	0.0216059	0.00556425	2838.28	0.795002	-0.0249583	0.00645566
Gm05_7682777	595.335	0.791796	0.015404	0.00494157	7601.14	0.708697	0.0497806	0.0103819	1452.83	0.772402	-0.0246024	0.00615988	0.237213	0.728589	-0.000324439	0.00631717	112.167	0.795196	-0.00700657	0.00604843
Gm05_8710516	3.3549	0.791853	-0.00246589	0.00477773	213.783	0.709279	0.0160013	0.00663809	0.917775	0.772543	0.00140999	0.00528519	80.9772	0.72857	0.0152916	0.00520293	2211.86	0.794694	-0.0704597	0.00552883
Gm05_8726075	11.1682	0.791851	0.00471629	0.00467331	1.09118	0.709312	0.0011919	0.00673675	7.89242	0.772541	0.00436418	0.00532973	8.19549	0.728587	0.00520771	0.00516818	1088.2	0.794941	-0.0521453	0.00548897
Gm05_8775990	8.57016	0.791852	-0.00425157	0.00495028	0.135906	0.709312	-0.000431561	0.00657185	83.7519	0.772523	0.0146844	0.00547065	10.6133	0.728586	0.0061687	0.00518481	979.441	0.79496	-0.0510828	0.005859
Gm05_8792560	14.4013	0.791851	-0.00549045	0.00472307	19.3244	0.709309	-0.00512897	0.00586325	135.692	0.77251	0.0186087	0.00517282	2.37425	0.728589	0.00290104	0.00551902	1018.5	0.794951	-0.0518652	0.00569317
Gm05_8827998	201.47	0.791808	-0.0208735	0.00455554	78.5225	0.709299	-0.010477	0.00579914	424.401	0.772439	0.0335128	0.00526987	22.2398	0.728583	0.00907405	0.00531164	250.128	0.795144	-0.0261774	0.00612338
Gm05_8883636	516.015	0.79174	-0.0324833	0.00480048	0.185694	0.709312	0.000497263	0.00570816	610.493	0.772398	0.0389553	0.00546503	6.13253	0.728588	0.00458677	0.00580791	212.937	0.795155	-0.0234177	0.0063974
Gm05_8927382	191.695	0.79181	-0.0204133	0.0046331	77.1143	0.709299	-0.0104203	0.00570032	105.016	0.772517	0.0167182	0.00541415	178.837	0.72854	0.0258089	0.00554387	45.0088	0.795196	-0.0111355	0.00657221
Gm05_8945269	89.4037	0.791834	-0.0138417	0.0050822	7.30144	0.709311	-0.00318283	0.00619386	0.00366298	0.772543	-9.78968e-05	0.00568582	104.895	0.728561	0.0195363	0.00600701	89.5759	0.795185	-0.0155772	0.00709086
Gm05_8965870	686.893	0.791704	-0.0369168	0.0053084	1607.39	0.709051	-0.0459267	0.00601579	815.041	0.772354	0.043994	0.00562266	34.8796	0.72858	0.0105214	0.00598541	2824.77	0.794521	0.0833671	0.00920211
Gm05_9031381	90.3577	0.791835	-0.0130513	0.00478502	3125.51	0.708817	-0.0625067	0.00608972	298.432	0.772475	0.0259323	0.00539929	375.497	0.728497	-0.0336643	0.00615852	253.374	0.795148	0.0243379	0.00666321
Gm05_9059146	254.823	0.791799	-0.0221108	0.00503818	3286.57	0.708787	-0.064662	0.00611528	598.559	0.772406	0.0370916	0.00513838	277.525	0.72852	-0.0293041	0.00665081	226.272	0.795154	0.0232281	0.00642528
Gm05_9071373	230.777	0.791804	-0.0211362	0.00503152	3230.51	0.708794	-0.0643059	0.00562812	710.429	0.77238	0.0406138	0.00533985	504.169	0.728463	-0.0397448	0.0065808	228.447	0.795153	0.0234569	0.00590776
Gm05_9098630	235.839	0.791803	-0.0213883	0.00545382	3188.39	0.7088	-0.0639556	0.00550814	809.541	0.772357	0.0433908	0.00532267	783.937	0.728392	-0.0495809	0.00659249	210.756	0.795157	0.0225505	0.00589082
Gm05_9109929	199.877	0.791813	-0.0188214	0.00530592	3371.62	0.708791	-0.0633284	0.00550273	422.782	0.772451	0.0297279	0.00508725	117.903	0.728562	-0.0179161	0.00634526	0.00655161	0.795208	-0.000119286	0.00549898
Gm05_34183576	5629.19	0.791391	0.0399772	0.00752824	7538.11	0.708824	-0.0396456	0.00519506	1943	0.772382	-0.0242224	0.00653476	3494.59	0.728305	-0.0339533	0.00869992	186.175	0.795192	0.00767934	0.00538174
Gm05_34863934	2259.89	0.791623	0.0314616	0.00594994	2016.95	0.70915	-0.0255205	0.00542032	334.502	0.772508	-0.0127975	0.00546934	3388.72	0.728221	0.0446343	0.00807923	151.684	0.795191	-0.00880431	0.00566791
Gm05_34877126	3888.27	0.791466	0.0402621	0.00646697	819.009	0.709248	-0.0159069	0.00551197	773.375	0.772463	-0.0189451	0.00528616	1170.74	0.728466	0.0254485	0.00890275	30.6592	0.795205	-0.00385482	0.00545921
Gm05_34892721	495.102	0.791784	-0.0203826	0.00605467	1787.12	0.709115	0.032905	0.00584736	260.573	0.772504	0.0158173	0.00635826	535.484	0.728506	-0.0253319	0.00733425	370.038	0.795151	-0.0192359	0.00572062
Gm05_34942627	574.751	0.791772	-0.0221656	0.00622584	2781.5	0.709002	0.0414269	0.00614114	335.864	0.772493	0.018136	0.00649404	642.27	0.728488	-0.0280499	0.00744295	631.818	0.795109	-0.0253826	0.00644385
Gm05_34961333	921.772	0.791733	-0.0257016	0.00577323	1106.08	0.7092	-0.0237207	0.00625988	1698.25	0.772315	-0.0367274	0.00711172	6977.63	0.727635	-0.0806082	0.0099393	481.842	0.79514	0.0199989	0.00735378
Gm05_34997573	929.797	0.79172	-0.0284589	0.00555246	4026.34	0.708859	0.0504152	0.00645024	1132.11	0.772373	0.0335484	0.00647093	598.264	0.728495	-0.0271613	0.0076596	771.087	0.795086	-0.0282614	0.00838338
Gm05_35210687	10.5267	0.791852	-0.00298153	0.00503684	1591.74	0.709138	-0.0308447	0.00611525	619.855	0.772452	-0.0241387	0.00700662	5407.2	0.727782	-0.0775008	0.0090608	512.1	0.795129	0.0224204	0.00715585
Gm05_35363571	186.984	0.791823	-0.0143433	0.00548837	30.0417	0.709308	0.00483598	0.005848	391.394	0.772477	0.0220992	0.00624985	77.1128	0.728576	-0.0108678	0.00735051	2980.48	0.794681	0.0622264	0.00741003
Gm05_35407848	442.483	0.791783	-0.0217936	0.00570157	9.58602	0.709311	-0.00270083	0.00553565	911.144	0.772392	0.0332744	0.00646359	32.9599	0.728584	0.00700213	0.00693131	2104.35	0.794841	0.0516184	0.00687837
Gm05_35556272	235.407	0.791813	0.0173653	0.00548472	52.1807	0.709305	0.00698072	0.00542535	205.835	0.772506	-0.0172641	0.00548647	4.39097	0.728588	0.00277915	0.00702851	2523.6	0.794728	0.0616941	0.00660898
Gm05_35584115	986.259	0.791679	0.0360303	0.00732652	289.344	0.709271	-0.0169354	0.00536595	7.0779	0.772542	-0.00325665	0.00541061	114.743	0.728567	-0.0145301	0.00653246	857.647	0.795042	0.0365886	0.00616459
Gm05_35595269	903.374	0.791694	0.0344705	0.00654287	369.951	0.70926	-0.0191343	0.00561685	1.3744	0.772543	-0.00143449	0.00523948	93.5437	0.728571	-0.013113	0.00628398	780.395	0.795057	0.0348883	0.00720904
Gm05_35629341	44.9173	0.791844	-0.00900646	0.00668701	1288.23	0.709109	0.0399722	0.00550763	409.201	0.772453	-0.0295443	0.00487742	799.698	0.728399	0.0473196	0.00661419	5.59061	0.795207	-0.00351963	0.00733097
Gm05_35658274	10.2143	0.791852	-0.00428783	0.00587588	896.45	0.709171	0.0332951	0.0052655	355.531	0.772465	-0.0274942	0.00550444	530.936	0.728463	0.0385029	0.00625079	34.5063	0.7952	-0.00872975	0.00638941
Gm05_35717294	12.2402	0.791851	-0.00478005	0.00582286	1152.98	0.709127	0.03836	0.00584687	219.773	0.772494	-0.0220714	0.00585408	870.336	0.728377	0.0506092	0.00630549	13.2643	0.795205	0.00552475	0.00633077
Gm05_35744409	120.638	0.791829	-0.0148395	0.00561851	1108.05	0.709136	0.0372273	0.0055012	4.30784	0.772542	0.00305318	0.00647591	921.613	0.728368	0.0513707	0.00560185	97.6038	0.795185	0.0148074	0.00615678
Gm05_35756309	308.61	0.79179	-0.0236411	0.00533088	589.089	0.709219	0.0270289	0.00582653	2.5119	0.772542	0.0023202	0.00694284	514.507	0.728467	0.0381313	0.00569207	64.8193	0.795193	-0.01201	0.0063249
Gm05_35797385	258.9	0.791801	-0.021357	0.00498791	227.095	0.709277	0.0165734	0.00551398	22.287	0.772538	0.00680596	0.00762238	331.257	0.728512	0.0300398	0.00572882	10.5882	0.795206	-0.00478095	0.0058529
Gm05_35809039	357.166	0.791781	-0.025065	0.00506554	308.804	0.709264	0.0193143	0.00585884	135.681	0.772513	0.0167748	0.00787039	475.962	0.728478	0.0359444	0.00598502	14.8742	0.795205	-0.00566082	0.00600235
Gm05_36134341	1782.32	0.791586	-0.0410636	0.00517852	1286.33	0.70916	-0.0299775	0.00636986	4696.96	0.771818	0.0702258	0.00767589	538.117	0.728504	0.0257691	0.00609934	798.43	0.795078	-0.0296133	0.00607637
Gm05_36244068	3524.9	0.791335	-0.0566484	0.00542747	1074.78	0.709187	-0.0268513	0.00599756	7216.68	0.771448	0.0856501	0.00844831	26.8193	0.728585	-0.00571413	0.00609264	20.875	0.795205	-0.00471283	0.0063401
Gm05_36269771	3669.11	0.791314	-0.0576799	0.00540331	1825.48	0.7091	-0.0349504	0.00614901	5840.69	0.771658	0.0768808	0.0078582	125.584	0.72857	-0.0123206	0.00595272	68.8309	0.795197	-0.00853664	0.00662635
Gm05_36588305	138.68	0.791832	-0.0118482	0.00529705	487.266	0.709253	0.0189794	0.00593337	2315.38	0.772172	0.0511929	0.00684693	162.843	0.728562	-0.0148552	0.00637723	148.293	0.795183	-0.0132414	0.00705434
Gm05_36670153	230.035	0.791818	-0.0153997	0.00567758	647.882	0.709232	0.0220575	0.00603607	1575.99	0.772287	0.0427006	0.0067279	50.068	0.728581	-0.00835652	0.00601831	13.6605	0.795206	0.00406202	0.00710936
Gm05_36938202	224.19	0.791819	-0.0151641	0.00593974	269.92	0.709279	0.0142164	0.00615983	131.435	0.772522	0.0123076	0.0063467	71.8884	0.728577	0.00999879	0.00598634	1562.59	0.794942	-0.0433314	0.00759582
Gm05_36950840	210.933	0.791821	-0.0146855	0.00634052	402.164	0.709263	0.0173272	0.00580427	150.863	0.772519	0.0131635	0.00664708	41.3067	0.728582	0.0075648	0.00604502	1388.57	0.794972	-0.04078	0.00687933
Gm05_37074312	589.773	0.791756	0.0261264	0.0066963	2168.71	0.70903	-0.042732	0.00616703	3.10941	0.772542	-0.00201476	0.00593696	1529.86	0.728316	-0.0492864	0.00622391	1424.62	0.79495	-0.0440254	0.00647671
Gm05_37093972	5.48387	0.791853	0.00231019	0.00601148	2559.71	0.709007	-0.0425251	0.00565581	292.371	0.772497	-0.0177438	0.00563013	4195.65	0.727921	-0.0727587	0.00768101	27.5035	0.795203	-0.00556287	0.00694524
Gm05_37105879	123.205	0.791833	0.0118219	0.0061568	4067.21	0.708788	-0.0579993	0.00539658	80.6642	0.772529	0.0101575	0.00553587	1976.78	0.728239	-0.0555101	0.00701409	557.396	0.795108	-0.0272641	0.00625578
Gm05_37131137	374.28	0.791791	0.02087	0.00578104	3938.13	0.708797	-0.0578935	0.00555852	39.3246	0.772536	0.00718173	0.00491947	2700.16	0.728106	-0.0656324	0.00729368	1415.2	0.794951	-0.0439838	0.0063992
Gm05_37436766	7825.13	0.790541	0.0962051	0.00682049	2078.29	0.709032	-0.0432852	0.00529979	384.94	0.772477	-0.0223956	0.00501084	985.408	0.728418	0.0384586	0.00771519	1296.76	0.794973	-0.0420224	0.00618527
Gm05_37467797	5623.45	0.79091	0.0815469	0.00561628	2950.43	0.708916	-0.0514791	0.00557097	194.51	0.772509	-0.0159142	0.00489752	814.22	0.728448	0.0349632	0.00639713	1320.2	0.794969	-0.0423829	0.00664739
Gm05_37908970	3081.69	0.79119	0.0775123	0.00546298	923.703	0.709158	-0.035807	0.00557044	28.5897	0.772536	0.00798277	0.00483512	211.735	0.728539	0.0241628	0.006051	10.2057	0.795206	-0.0048682	0.00619092
Gm05_37932112	2340.69	0.791336	0.069312	0.00539994	1143.9	0.709117	-0.0406796	0.005596	143.635	0.77251	0.0184016	0.00504362	129.634	0.728558	0.019544	0.00538047	47.053	0.795197	0.0107478	0.00607315
Gm05_37943527	2222.31	0.791361	0.0676804	0.00486744	1085.57	0.709127	-0.039713	0.0057221	165.756	0.772504	0.0198103	0.0054656	134.805	0.728556	0.0199743	0.00510929	42.0995	0.795198	0.0101883	0.006007
Gm05_38072447	984.037	0.791632	0.0458446	0.00502146	769.767	0.709178	-0.034027	0.00571317	409.337	0.772446	0.031661	0.00562286	200.662	0.72854	0.0247368	0.00472789	131.626	0.795175	0.0183234	0.00587945
Gm05_38098018	418.392	0.791761	0.0293203	0.00441154	293.76	0.709262	-0.0204641	0.00562306	173.107	0.772503	0.0201922	0.0058244	119.199	0.72856	0.0187	0.00451283	0.00222317	0.795208	7.385e-05	0.00576317
Gm05_38388121	30.6211	0.791849	-0.00544405	0.00465926	1289.12	0.709157	-0.0304369	0.00534546	668.861	0.772438	-0.0268017	0.00628413	379.199	0.728529	-0.0218998	0.0050101	828.053	0.795072	0.0304763	0.00610043
Gm05_38440118	32.4673	0.791848	0.00600539	0.00492041	2236.15	0.709027	-0.0424985	0.00606137	1610.9	0.772272	-0.0447669	0.00673004	60.1483	0.728579	-0.00947531	0.0050964	450.988	0.795128	0.024203	0.00557225
Gm05_38635498	318.126	0.791791	-0.0226558	0.00498994	651.151	0.709215	-0.0269161	0.00544949	0.218604	0.772543	-0.000635917	0.00595154	112.276	0.728565	-0.0161036	0.00569766	39.9144	0.795199	0.00876859	0.00588342
Gm05_38652566	24.4441	0.791849	0.00635494	0.00488255	92.5657	0.709298	-0.0102008	0.00561984	0.172115	0.772543	0.000574017	0.00586304	0.851867	0.728589	-0.00144354	0.00612331	10.1349	0.795206	0.00449256	0.00571826
Gm05_38668006	177.848	0.791818	0.0173524	0.00517587	175.441	0.709285	-0.0142359	0.00562394	3.73602	0.772542	0.00270659	0.00664435	132.594	0.728559	-0.0182108	0.00691413	39.8259	0.795199	0.0090132	0.00552043
Gm05_38684022	325.386	0.791787	0.0238482	0.00512664	628.964	0.709215	-0.0273719	0.0055923	3.07933	0.772542	0.00249806	0.00647396	435.701	0.72849	-0.0335789	0.00795528	66.9638	0.795193	0.0118809	0.00599438
Gm05_38758844	93.6933	0.791835	0.0123404	0.0052488	874.19	0.709181	-0.0312817	0.00557331	77.9986	0.772527	0.0120445	0.00746656	1183.18	0.728334	-0.0522825	0.00923397	0.666788	0.795208	-0.00113655	0.00586828
Gm05_38821010	2559.4	0.79126	0.0760931	0.00598697	593.47	0.709206	-0.0307508	0.00535142	3909.28	0.771603	-0.0998217	0.00746553	1690.81	0.728169	0.072105	0.00942377	10.5326	0.795205	0.00529807	0.00626072
Gm05_38866786	1899.54	0.791408	0.0663064	0.00554795	390.526	0.709242	-0.0251665	0.00515764	2878.14	0.771843	-0.086629	0.00749144	1749.31	0.72815	0.0741271	0.00824619	14.1938	0.795204	0.00621874	0.00626103
Gm05_38940240	667.139	0.791688	0.0414421	0.00517431	303.376	0.709254	-0.0234021	0.00523973	2578.65	0.771884	-0.0861161	0.00738366	727.615	0.728399	0.0497748	0.00725561	504.575	0.795072	0.0389463	0.00613094
Gm05_38961864	785.576	0.791651	0.0468251	0.00571861	289.594	0.709255	-0.023787	0.00543291	2280.12	0.771935	-0.0844796	0.00730238	259.708	0.728518	0.0311261	0.00669693	361.769	0.795107	0.0343971	0.00635076
Gm05_38995911	158.233	0.791806	0.0247279	0.00551858	4.74042	0.709311	-0.00358904	0.00578043	77.4446	0.772519	-0.0182886	0.00653778	691.895	0.728369	0.0591588	0.00594758	1.4549	0.795208	-0.0025613	0.00606083
Gm05_39042263	24.7596	0.791846	-0.0105544	0.00541131	27.9865	0.709305	0.00936715	0.00565422	3.48995	0.772542	0.00420818	0.00582905	522.072	0.728407	0.0561336	0.00562555	49.5449	0.79519	-0.0161933	0.00595698
Gm05_39069869	223.084	0.791777	-0.0330908	0.00515324	28.1988	0.709305	-0.00980417	0.00563593	132.533	0.772496	0.0271593	0.00567078	118.761	0.728545	0.0283281	0.00565824	144.25	0.795154	-0.0289309	0.00585657
Gm05_39082944	84.0315	0.791825	-0.0205904	0.00532126	59.9817	0.709296	0.0144946	0.00584013	4.55162	0.772541	0.00510479	0.00532802	427.934	0.728429	0.0545675	0.00570491	57.9811	0.795186	-0.0186022	0.0058725
Gm05_39127916	290.29	0.791755	-0.0376447	0.00499525	179.881	0.709265	0.0247183	0.00562065	62.1115	0.772521	0.0185223	0.00500251	284.965	0.728485	0.04361	0.00548385	205.293	0.795132	-0.0343848	0.00609102
Gm05_39158352	487.055	0.791665	-0.055347	0.00592645	472.26	0.709172	0.0453756	0.00565728	192.114	0.772465	0.0371095	0.00521024	20.7741	0.72858	-0.0134945	0.0055691	48.0246	0.795188	-0.0189422	0.0058006
Gm05_39220229	691.142	0.791588	-0.0653844	0.00528611	867.637	0.709057	0.0611297	0.00597698	247.048	0.772444	0.041631	0.00504652	14.8954	0.728583	-0.011249	0.00601457	243.628	0.795106	-0.0422141	0.00590464
Gm05_39235184	938.238	0.791643	0.0444818	0.00641853	184.303	0.709279	-0.0172894	0.00637401	194.485	0.772499	-0.0208934	0.00535696	456.623	0.728488	-0.033256	0.00619512	1066.69	0.794954	-0.0500971	0.00634919
Gm05_39254398	396.877	0.791692	-0.052436	0.00519663	131.628	0.709271	0.0251557	0.00606692	228.747	0.772446	0.0425817	0.00506148	8.44031	0.728585	-0.0090781	0.00588129	399.735	0.79503	-0.0574474	0.00615338
Gm05_39274215	377.929	0.791698	-0.0518306	0.00526127	242.389	0.709236	0.0345641	0.00576698	159.403	0.772474	0.0360378	0.0049518	36.4243	0.728573	-0.0191449	0.00586264	419.898	0.795018	-0.0596849	0.00587269
Gm05_39330716	2.21835	0.791853	-0.00422023	0.00514832	0.197978	0.709312	-0.00104721	0.00572938	201.257	0.772451	0.0431867	0.00509708	127.999	0.728528	0.038453	0.00664949	2.31824	0.795207	0.00472953	0.00598338
Gm05_39343810	97.0226	0.791811	-0.0281495	0.00497648	8.2594	0.709309	0.00682264	0.00530147	301.512	0.772403	0.0533308	0.00514226	23.3876	0.728578	0.0165969	0.00574464	12.3545	0.795202	0.0110157	0.00576275
Gm05_39361175	75.6418	0.79182	-0.0250877	0.00523713	1.11754	0.709312	-0.00252904	0.00531941	217.807	0.772441	0.0458003	0.00495618	10.5118	0.728584	-0.0112653	0.00556376	2.59288	0.795207	0.00509844	0.00548417
Gm05_39390783	10.4143	0.791849	0.00909947	0.00481193	9.31173	0.709309	0.00718185	0.00589758	12.6361	0.772537	0.0107408	0.00538273	207.738	0.72849	-0.0483417	0.00609785	0.325177	0.795208	0.00175841	0.00560854
Gm05_39413057	48.4224	0.791832	-0.0198491	0.0051552	8.38592	0.709309	-0.00688061	0.00545878	86.6805	0.772503	0.0285099	0.00512344	14.5117	0.728582	-0.0129975	0.00570737	25.4346	0.795196	-0.0157585	0.00614922
Gm05_39424430	8.13541	0.79185	-0.00840562	0.00495448	168.256	0.709254	0.0316067	0.00560116	58.9532	0.772515	0.0244957	0.00505262	72.6071	0.728552	0.0308103	0.00571642	1.05727	0.795207	-0.00334461	0.00593358
Gm05_39458453	75.182	0.791821	-0.024756	0.0050004	47.3271	0.709296	-0.0162627	0.00561482	368.909	0.772372	0.0592153	0.00496595	0.852056	0.728589	0.00321201	0.00541717	0.243034	0.795208	0.00155025	0.00569282
Gm05_39475896	1.52511	0.791853	-0.00373031	0.004775	7.67607	0.709309	-0.0069032	0.00547845	87.7975	0.772499	0.0307433	0.00488049	81.8189	0.728546	0.0338846	0.00568461	15.8211	0.7952	-0.0133016	0.00612315
Gm05_39532734	1.84672	0.791853	-0.00412188	0.00503327	87.5478	0.709281	0.0233735	0.00562395	10.2716	0.772538	0.0105773	0.00475382	210.565	0.728476	0.0549141	0.00541961	2.85278	0.795207	-0.00568029	0.00623586
Gm05_39556707	73.6496	0.791819	-0.0261567	0.00496699	279.509	0.709213	0.0418822	0.0059195	212.424	0.772437	0.0483644	0.00467195	109.132	0.72853	0.0398226	0.00536657	15.9633	0.7952	-0.013511	0.00611931
Gm05_39567682	43.8253	0.791833	-0.0204689	0.00501186	99.7948	0.709276	0.0253523	0.00545301	143.259	0.77247	0.0403653	0.00477368	142.058	0.728511	0.0463404	0.00533578	0.938929	0.795208	-0.00332949	0.00608772
Gm05_39611479	167.062	0.791776	0.0388936	0.00524523	6.57823	0.70931	0.00634799	0.00517138	0.533752	0.772543	-0.00239301	0.00462726	3.97208	0.728587	0.00749781	0.00542856	0.00450462	0.795208	0.000224009	0.00563637
Gm05_39622650	29.6955	0.79184	0.0166533	0.0050476	0.0380551	0.709312	0.000489826	0.00540496	1.83629	0.772542	0.00451323	0.00489323	12.9838	0.728582	0.0138169	0.00570661	5.02375	0.795205	0.00760568	0.00603751
Gm05_39640700	7.19283	0.79185	0.00811668	0.00531139	2.48872	0.709311	0.00392746	0.00526231	14.2471	0.772536	0.0124325	0.00479177	52.0812	0.728561	0.0272958	0.00569772	6.24143	0.795205	0.008385	0.0058395
Gm05_39660805	0.247654	0.791854	-0.00149474	0.00539192	171.951	0.709252	0.0324155	0.00533905	16.4874	0.772535	-0.013263	0.00496624	119.932	0.728526	0.0410119	0.00566289	1.92485	0.795207	0.00461812	0.00573809
Gm05_39673150	10.7441	0.791849	0.00922842	0.00527703	386.222	0.709184	0.0458768	0.00531366	15.2767	0.772536	-0.0118847	0.00487179	26.9545	0.728576	0.0178547	0.00599286	54.1547	0.795182	0.0228172	0.00540894
Gm05_39686834	80.3187	0.791817	0.0266865	0.00501208	125.914	0.709268	0.0275807	0.00550687	47.3296	0.77252	-0.0222469	0.00482341	73.9488	0.72855	0.0318024	0.00565057	4.11161	0.795206	0.00668306	0.00565856
Gm05_39710912	6.87745	0.791851	0.00757084	0.00499292	146.17	0.709262	0.0289579	0.0052749	1.22678	0.772542	-0.00345974	0.00519168	157.415	0.72851	0.0444877	0.00594272	19.2713	0.795198	0.0139803	0.00618294
Gm05_39727679	169.817	0.791782	0.0357277	0.00522041	202.975	0.709247	0.0324087	0.00522765	142.171	0.77248	-0.0352271	0.00495684	472.85	0.728366	0.0723705	0.00592476	2.6537	0.795207	0.00490912	0.00598177
Gm05_39743640	295.993	0.791723	0.0493554	0.00527391	95.8714	0.70928	0.023255	0.00539511	108.24	0.772492	-0.0322734	0.00502348	279.176	0.72845	0.058757	0.00589979	1.55501	0.795207	0.0039444	0.00567195
Gm05_39771156	6.72421	0.791851	-0.00737552	0.00543643	228.677	0.709236	0.0356472	0.00501976	0.185432	0.772543	-0.00132198	0.00520072	488.537	0.728349	0.0766356	0.00580078	63.1303	0.795177	0.0248738	0.00566034
Gm05_39790169	20.2376	0.791845	0.0126842	0.0055945	212.534	0.709242	0.0341074	0.0055282	44.2655	0.772523	-0.0202221	0.0052644	307.985	0.72844	0.0601034	0.00591419	231.563	0.795097	0.0471672	0.00578774
Gm05_39919468	6.3096	0.791852	0.0049054	0.00598493	3.22703	0.709311	-0.00300821	0.00606176	77.0958	0.772519	0.0178365	0.00518013	45.3637	0.728575	0.014427	0.00567786	0.00910076	0.795208	-0.000198316	0.00608751
Gm05_40021539	2301.57	0.791159	-0.0938616	0.00664875	426.061	0.709211	0.0344402	0.005821	1182.2	0.77218	0.070064	0.0056833	80.8336	0.728564	-0.0193897	0.00610732	184.448	0.795148	0.0283284	0.00605221
Gm05_40043018	2456.55	0.791115	-0.0965628	0.0069084	600.031	0.709171	0.0407053	0.00614827	1295.34	0.772147	0.0730119	0.00647841	27.4287	0.728581	-0.0112385	0.00556026	164.423	0.795155	0.0266288	0.00628178
Gm05_40085455	228.35	0.791787	-0.0285784	0.00576546	1125.74	0.709056	0.0538216	0.00628595	994.284	0.772246	0.0624863	0.00657128	135.73	0.728548	-0.0247459	0.00556097	99.2634	0.795177	-0.0201957	0.00666818
Gm05_40102714	71.6511	0.79183	-0.0177893	0.00603146	22.2428	0.709307	0.00833767	0.00597476	26.7874	0.772534	0.0115251	0.00642178	42.6775	0.728574	-0.0158995	0.0056986	665.365	0.794973	0.0586589	0.00713825
Gm05_40140296	1301.16	0.791564	0.0520096	0.00754043	411.194	0.70924	-0.0249826	0.00685516	381.676	0.772457	-0.0293389	0.00720579	268.286	0.728529	-0.0260232	0.00614883	189.253	0.795163	-0.0211393	0.00776944
Gm05_40160913	132.907	0.791808	-0.0254721	0.00577917	0.170798	0.709312	-0.000762752	0.00575879	18.9783	0.772536	0.0102555	0.00610773	151.453	0.728533	-0.0319996	0.00579308	306.277	0.795094	0.0420578	0.00676919
Gm05_40182447	75.6483	0.791831	-0.0168872	0.00570967	469.58	0.709203	0.035627	0.00615075	106.893	0.77251	-0.0211016	0.00586288	208.755	0.728524	-0.0317246	0.00595478	1113.16	0.794848	0.0695847	0.00623218
Gm05_40198362	90.7998	0.791822	-0.0215049	0.00540799	45.9468	0.7093	0.0127401	0.00579184	7.86864	0.77254	-0.00675657	0.00574261	20.1879	0.728582	0.0119879	0.00589407	1213.55	0.794746	0.0856062	0.00661867
Gm05_40249427	46.4487	0.791838	-0.0152115	0.00536917	82.1602	0.70929	0.0169052	0.00537919	6.4218	0.772541	-0.00603034	0.00572573	16.0423	0.728583	0.0105275	0.00613221	712.402	0.79494	0.0648231	0.0065319
Gm05_40300355	74.4451	0.791833	0.0156661	0.0055415	61.2731	0.709299	-0.0120375	0.00553074	2.40698	0.772542	-0.00296854	0.00564694	91.3675	0.728562	0.0197582	0.00627878	760.808	0.794977	0.0539254	0.0065781
Gm05_40323546	200.833	0.791769	-0.0384984	0.00524916	1.49138	0.709312	-0.00275191	0.00567956	281.059	0.77242	-0.0487847	0.00593422	28.031	0.728576	0.0171081	0.0058792	1140.51	0.794683	0.100241	0.00654991
Gm05_40354297	93.5526	0.791813	-0.0272974	0.00512396	13.9272	0.709308	0.00869419	0.0055891	192.942	0.772455	-0.0422236	0.00538234	122.255	0.72853	-0.037706	0.00598481	668.858	0.794887	0.0801648	0.00645389
Gm05_40367171	59.7592	0.791828	-0.0217102	0.00512927	6.05671	0.70931	0.00572884	0.00560963	186.082	0.772458	-0.0412454	0.00523953	342.832	0.728424	-0.0627429	0.00605953	609.658	0.794916	0.0761329	0.00637155
Gm05_40384370	96.4654	0.791812	-0.0276633	0.00538893	60.4009	0.709292	0.0181247	0.00579215	94.536	0.7725	-0.0294836	0.00514243	356.114	0.728418	-0.0641147	0.00601734	547.295	0.794946	0.0723427	0.00698415
Gm05_40410190	195.988	0.791767	-0.0399485	0.00546719	50.3728	0.709295	0.0166936	0.00571846	130.744	0.772482	-0.0351693	0.00557767	238.271	0.728473	-0.0532893	0.00620734	430.9	0.794998	0.0651084	0.00714749
Gm05_40453063	166.488	0.791784	0.0351652	0.00535122	737.403	0.709079	-0.0605958	0.00610538	1041.22	0.772081	-0.095073	0.00592126	342.449	0.728428	-0.0615948	0.0062631	3.78685	0.795206	-0.00584944	0.00680826
Gm05_40473764	154.482	0.791789	0.0336376	0.00521644	561.859	0.709135	-0.0528008	0.00567884	921.497	0.772137	-0.0888075	0.00580371	476.432	0.728366	-0.072125	0.00613003	120.743	0.795152	-0.0327919	0.00669157
Gm05_40495741	164.399	0.791787	0.0337475	0.00494577	95.4727	0.709283	-0.021284	0.00565598	600.175	0.772286	-0.0695219	0.00570169	600.124	0.728318	-0.0780563	0.00658939	215.715	0.795111	-0.0425174	0.00722299
Gm05_40508346	30.8437	0.791841	0.0145766	0.00498534	302.487	0.709219	-0.0376264	0.00584193	325.27	0.772404	-0.0510229	0.00595886	387.987	0.728415	-0.062539	0.00585452	56.4477	0.795183	-0.021682	0.00688812
Gm05_40523972	353.742	0.791704	0.0516393	0.00536298	291.466	0.709219	-0.0383561	0.00555597	921.83	0.77213	-0.0903376	0.00571811	401.61	0.728397	-0.0676795	0.0059191	45.8181	0.795186	-0.0205408	0.00642827
Gm05_40547480	4.12859	0.791852	-0.0056571	0.0053952	272.811	0.709223	0.0379806	0.00607704	250.545	0.77243	-0.0473353	0.00590555	86.0917	0.728549	-0.0308962	0.00577916	313.275	0.79506	0.0540019	0.00847452
Gm05_40579178	230.265	0.791757	0.0412027	0.00552495	470.432	0.709164	-0.0482086	0.00583121	713.973	0.772227	-0.07859	0.00572251	313.213	0.728441	-0.0590483	0.00547383	290.251	0.795073	-0.0510944	0.00684832
Gm05_40594829	246.427	0.79175	0.0425946	0.00572228	197.781	0.70925	-0.0312372	0.00592693	729.9	0.77222	-0.0794212	0.00557343	130.009	0.728528	-0.0380454	0.00549457	295.802	0.79507	-0.0515536	0.00654801
Gm05_40632675	308.833	0.791727	0.0468594	0.0053322	274.153	0.709227	-0.0362273	0.00580305	412.963	0.772363	-0.0586489	0.00548432	50.7339	0.728566	-0.0232787	0.00525483	162.296	0.795134	-0.0374899	0.00656121
Gm05_40648210	117.28	0.791807	0.0279718	0.00560748	396.61	0.709193	-0.0422612	0.00576223	97.1129	0.772502	-0.0274939	0.00523114	121.603	0.728535	-0.0347009	0.00550405	317.058	0.795068	-0.0506518	0.00650906
Gm05_40662951	21.832	0.791845	0.012107	0.00535502	268.643	0.709231	-0.0348453	0.00582105	126.126	0.77249	-0.0314385	0.00531995	41.4993	0.728571	-0.0203507	0.00569203	386.752	0.795037	-0.0561283	0.00648652
Gm05_40699084	29.2006	0.791843	-0.0131261	0.00542119	82.9556	0.709289	-0.0182714	0.00533366	71.6226	0.772515	0.022089	0.00550775	126.793	0.728537	-0.0328359	0.00594366	596.068	0.794962	-0.0649941	0.00695398
Gm05_40717034	0.19063	0.791854	-0.00107192	0.0052446	64.9679	0.709293	-0.0163186	0.00556185	2.96725	0.772542	0.00455235	0.0051964	11.7427	0.728584	-0.0101575	0.00599183	598.87	0.794958	-0.0659487	0.00780949
Gm05_40738642	27.9613	0.791843	0.0127416	0.00553079	377.53	0.709206	-0.0386601	0.0053541	3.5901	0.772541	0.00490589	0.00542327	87.4918	0.728553	-0.0270675	0.00596106	358.004	0.795061	-0.0499713	0.00786468
Gm05_40760970	97.4656	0.791819	-0.0226181	0.00526538	1208.76	0.708985	0.0663666	0.00594176	6.64105	0.77254	0.00626825	0.00530594	263.929	0.72849	0.0431489	0.006384	276.396	0.795102	0.0412976	0.00802661
Gm05_40781292	0.038293	0.791854	0.000406509	0.00522879	181.459	0.709267	0.023478	0.00565766	89.1348	0.772513	0.0207476	0.00570582	331.397	0.728477	0.0435667	0.00663182	2205.92	0.794441	0.105353	0.00944315
Gm05_40798065	194.49	0.791794	0.0278449	0.00519541	844.581	0.709113	-0.0484058	0.00572322	5.02771	0.772541	-0.00475155	0.00534039	45.2239	0.728574	0.0155901	0.0060413	165.967	0.795152	0.0278812	0.0087264
Gm05_40811428	24.2477	0.791847	-0.00943164	0.00528776	410.468	0.709218	0.0327458	0.00586957	48.7736	0.772528	-0.0140691	0.00579434	126.256	0.72855	0.0243943	0.00609812	2841.01	0.794302	0.10964	0.0105535
Gm05_40824886	88.1601	0.791826	0.0190789	0.00541483	404.058	0.709214	0.0342981	0.00608647	54.1112	0.772525	-0.0157946	0.00570066	291.252	0.728493	0.0398278	0.00582738	2680.12	0.794298	0.113452	0.0112195
Gm05_40837883	1018.85	0.791602	0.0510111	0.00657556	281.765	0.709258	-0.02266	0.00635846	424.897	0.772436	-0.0344584	0.00608054	6.86691	0.728587	0.0046655	0.00646109	445.455	0.79509	-0.0360852	0.00932234
Gm05_40919030	278.323	0.791793	-0.0235071	0.0058165	225.954	0.709274	-0.0180216	0.00651032	18.0922	0.772539	-0.00626071	0.00533168	623.741	0.728451	0.0390756	0.00612494	1232	0.79492	-0.0528265	0.0105369
Gm05_40945705	1963.3	0.791358	-0.0724743	0.00787694	2194.48	0.708884	0.0645154	0.00798241	9.53233	0.77254	0.00532738	0.00547177	594.017	0.728432	0.0455114	0.00628388	350.667	0.795112	0.0330188	0.00977837
Gm05_41172496	5.14481	0.791852	-0.00365505	0.0056711	1186.85	0.709085	-0.0464442	0.00716573	0.117446	0.772543	-0.000586024	0.00508507	42.9707	0.728578	0.0122502	0.00672716	2642.37	0.794493	-0.0896971	0.00933182
Gm05_41211445	107.039	0.791823	-0.0195399	0.00578035	284.331	0.709249	0.0264105	0.0062635	159.352	0.772494	-0.0255891	0.00497151	443.498	0.728446	0.0478806	0.00601978	454.872	0.795062	-0.0441037	0.00734811
Gm05_41236434	145.387	0.79181	-0.023317	0.00544642	357.071	0.709231	0.0302122	0.00597385	24.1875	0.772535	-0.0102288	0.00499107	475.165	0.728431	0.0510538	0.0059697	441.971	0.795063	-0.0445938	0.00708833
Gm05_41261714	429.119	0.791723	-0.0407632	0.00525222	364.185	0.709228	0.031003	0.00612621	1.16906	0.772543	-0.00229299	0.00540544	493.038	0.728422	0.0532352	0.00607918	502.907	0.795039	-0.0484932	0.00651731
Gm05_41274320	82.204	0.791829	-0.0176748	0.00522254	162.629	0.709275	0.0205416	0.00557781	83.7223	0.772516	-0.0192	0.00562077	342.748	0.728474	0.043822	0.00621217	203.816	0.79514	-0.0305539	0.00568867
Gm05_41314630	403.281	0.791739	-0.0369883	0.00515725	17.515	0.709308	0.00640473	0.00599936	8.2914	0.77254	-0.00568091	0.0058886	523.036	0.728426	0.0503861	0.0071735	37.5003	0.795196	-0.0123286	0.0056939
Gm05_41331000	74.6701	0.791831	-0.0168823	0.00502537	24.5895	0.709307	0.00800252	0.00605453	356.643	0.77243	-0.0397216	0.00684456	390.127	0.728458	0.0468804	0.00777247	36.0414	0.795196	-0.0128809	0.00597073
Gm05_41429678	310.786	0.791763	-0.033415	0.00479667	463.603	0.709209	0.0338817	0.00573437	529.682	0.772381	-0.0467454	0.00717966	907.534	0.728297	0.0683016	0.00862338	58.9706	0.795189	0.0159188	0.00632644
Gm05_41499741	1180.21	0.791548	-0.0575674	0.00519647	3416.6	0.708638	0.0813052	0.00611945	980.951	0.772278	0.0560445	0.00778375	393.496	0.728479	-0.0392924	0.00848018	1.26641	0.795208	-0.00205631	0.00609778
Gm05_41540078	918.597	0.791624	-0.0491512	0.00499173	3532.77	0.708634	0.0804367	0.00611633	636.024	0.772377	0.0436024	0.00685118	236.561	0.728525	-0.0293504	0.00813459	307.226	0.795124	0.0309428	0.0061547
Gm05_41626489	351.744	0.79176	-0.0323449	0.00487509	1208.41	0.709068	0.0495486	0.00587764	182.868	0.772492	0.0250567	0.0056593	1065.45	0.728275	-0.0678103	0.00692297	112.46	0.795175	0.020047	0.00601249
Gm05_41654008	87.3912	0.791831	-0.0159491	0.00523668	833.335	0.709145	0.0407277	0.00584467	105.964	0.772514	0.0188538	0.00528866	595.351	0.728416	-0.0500531	0.0067481	168.669	0.795159	0.0242683	0.00583444
Gm05_41666589	172.041	0.791809	-0.0222125	0.00534812	525.17	0.709208	0.0321155	0.00586981	103.372	0.772515	0.0184752	0.00530178	458.772	0.728457	-0.0435569	0.00676967	166.16	0.79516	0.0238988	0.00575825
Gm05_41698401	262.087	0.791785	-0.0273377	0.00534725	372.604	0.709238	0.0270106	0.00646909	117.082	0.772511	0.0196004	0.00501612	1128.52	0.728265	-0.0680232	0.00660602	203.314	0.79515	0.0263535	0.00601037
Gm05_41866722	0.00283514	0.791854	-7.89243e-05	0.00534707	1452.71	0.709058	0.0470336	0.00603483	0.971394	0.772543	0.00155552	0.0051064	15.4207	0.728585	0.00682496	0.00590336	242.228	0.795147	-0.0250791	0.00612366
Gm05_41891614	365.089	0.791771	0.0278877	0.00508942	259.163	0.709268	-0.0194964	0.00652702	408.132	0.772447	0.0315967	0.005112	3.85072	0.728588	0.00343195	0.00640773	4.0939	0.795207	-0.00322953	0.00607042
Gm05_41903142	157.235	0.791817	0.0190366	0.00489402	357.014	0.709248	-0.0238061	0.00587672	9.75531	0.772541	0.00507092	0.00482368	90.9807	0.728566	-0.017224	0.00600634	149.512	0.79517	-0.0202606	0.00660566
Gm05_41914164	294.398	0.791787	0.0253081	0.00483232	261.408	0.709267	-0.0197497	0.0058161	269.176	0.772479	0.0259683	0.00507601	16.6206	0.728585	0.00723548	0.00562875	9.46771	0.795206	0.00496937	0.0071484
Gm06_1116504	235.314	0.791814	-0.0165752	0.00454447	55.0696	0.709305	0.00676698	0.00562155	671.526	0.772428	0.0295296	0.00461448	6.75745	0.728588	0.0032343	0.00559753	5836.89	0.794156	0.0888568	0.00745673
Gm06_1120023	202.674	0.79182	-0.0153772	0.00450023	62.6674	0.709304	0.00721578	0.00530478	599.655	0.77244	0.0278962	0.00438788	4.47795	0.728588	0.00263228	0.00570881	6256.52	0.794081	0.0919571	0.00794738
Gm06_1122851	83.0293	0.79184	-0.00981849	0.00467442	72.0168	0.709303	0.00772366	0.00537108	169.446	0.772514	0.0147843	0.00467838	306.075	0.728535	0.021657	0.00586658	7366.02	0.793886	0.0994503	0.00930901
Gm06_1230564	279.336	0.791793	-0.0237068	0.00458005	502.726	0.709226	0.0269347	0.00534029	127.585	0.772514	0.0167962	0.00477318	378.053	0.728504	0.0309966	0.00694657	1281.33	0.794906	0.0544092	0.00854186
Gm06_1243165	336.607	0.791663	-0.0674693	0.0046105	78.9978	0.709279	0.02593	0.00560046	131.806	0.772461	0.0472782	0.00476892	6.39597	0.728585	-0.0125491	0.00619727	5.13876	0.795205	0.00948881	0.00872394
Gm06_1245593	437.099	0.791605	-0.0771129	0.0046649	114.448	0.709265	0.0313919	0.00538182	303.55	0.772354	0.071983	0.00506145	110.437	0.728511	-0.052357	0.00611653	7.01778	0.795203	-0.0111262	0.0081669
Gm06_1245809	269.052	0.7917	-0.060839	0.00448666	70.7326	0.709283	0.0246502	0.00542809	133.419	0.772459	0.0480428	0.0049471	18.5076	0.728576	-0.0215354	0.00586902	0.112698	0.795208	-0.00141908	0.0069862
Gm06_1246594	417.967	0.791617	-0.0749783	0.00482834	76.5913	0.709281	0.0254693	0.00538263	308.484	0.772352	0.0720887	0.00514662	9.03539	0.728583	-0.0148539	0.00613659	23.1614	0.795193	-0.0200816	0.00631063
Gm06_1247275	239.722	0.791718	-0.0569002	0.00498264	58.3687	0.709288	0.0222756	0.00536966	173.743	0.772435	0.0542102	0.00474774	70.9585	0.728539	-0.0416889	0.00585894	9.9871	0.795202	-0.0132121	0.00609383
Gm06_1247598	422.041	0.791631	-0.070289	0.00496162	34.3836	0.709299	0.0160814	0.00551641	301.442	0.77237	0.0659013	0.00482005	1.55278	0.728588	-0.00559081	0.006015	4.78621	0.795205	0.00844927	0.00592887
Gm06_1248084	180.816	0.79175	-0.0498458	0.00476974	70.9966	0.709283	0.02475	0.00559379	73.8202	0.772497	0.0357092	0.00476991	0.385798	0.728589	-0.0031192	0.00618013	4.92313	0.795205	0.00937189	0.00562451
Gm06_1249033	158.801	0.791762	-0.0470723	0.00492755	57.6113	0.709288	0.0224441	0.00550822	62.8441	0.772503	0.0332416	0.00480882	0.498077	0.728589	0.00358497	0.00586028	0.0759979	0.795208	0.00117466	0.00565352
Gm06_1250723	196.074	0.791743	-0.0513892	0.00486428	41.191	0.709295	0.0186966	0.00573239	83.4389	0.772491	0.0375113	0.00491729	2.1584	0.728588	0.00725856	0.00579275	1.01374	0.795207	0.00420286	0.00576673
Gm06_1251369	150.752	0.791767	-0.0455521	0.00502221	84.6418	0.709277	0.0270362	0.00594381	64.2997	0.772503	0.0333683	0.00498102	1.4344	0.728588	-0.00602717	0.00602627	9.62019e-05	0.795208	4.14778e-05	0.00589716
Gm06_1253237	209.369	0.791736	-0.0527492	0.00491671	31.0232	0.709299	0.0161245	0.00567075	134.272	0.77246	0.0472409	0.00548987	20.4029	0.728575	-0.02213	0.00615669	0.0665746	0.795208	0.00106936	0.0060527
Gm06_1253590	208.211	0.791736	-0.0526175	0.00475888	99.3589	0.709271	0.0289586	0.00579139	146.723	0.772453	0.0494185	0.00517403	34.1982	0.728565	-0.0287023	0.00625503	50.74	0.795175	-0.029541	0.00587231
Gm06_1254323	127.194	0.791781	-0.0419542	0.0046766	67.554	0.709284	0.0242104	0.00547118	45.9198	0.772514	0.0282859	0.00492474	0.147844	0.728589	-0.00194267	0.00619246	4.04085	0.795205	-0.00852661	0.00582252
Gm06_1254628	199.568	0.791739	-0.0525959	0.00482336	149.501	0.70925	0.0360453	0.00560034	35.5412	0.772521	0.0249076	0.0049857	13.5254	0.72858	0.0185972	0.00648455	3.6859	0.795206	-0.00815086	0.00593008
Gm06_1255028	175.534	0.791754	-0.0485896	0.00467273	65.3585	0.709285	0.0235102	0.00538228	63.9633	0.772503	0.0328266	0.00481948	1.81522	0.728588	-0.00665524	0.00618914	0.508775	0.795208	0.00297586	0.00612339
Gm06_1255208	258.391	0.791709	-0.0584988	0.00462895	165.462	0.709244	0.0371399	0.00522448	85.3386	0.772491	0.0376018	0.00503774	6.45719	0.728585	0.0124326	0.00629871	53.6458	0.795174	-0.0303046	0.00628968
Gm06_1257821	203.738	0.79174	-0.0516167	0.00484978	226.64	0.70922	0.0432089	0.00547298	95.4754	0.772485	0.0394937	0.00503307	11.6773	0.728581	-0.0165816	0.00647556	6.5583	0.795204	-0.0105227	0.00628432
Gm06_1259454	113.832	0.79179	-0.0387341	0.00536644	116.335	0.709265	0.031074	0.00560495	56.821	0.772508	0.0305874	0.00497151	15.2142	0.728579	-0.0189997	0.00665453	0.464786	0.795208	-0.00281225	0.00661128
Gm06_1260598	310.246	0.791679	-0.064055	0.00536421	95.2617	0.709273	0.0281655	0.00562793	154.006	0.772449	0.0504551	0.00551899	10.3693	0.728582	0.0157223	0.00692584	1.9322	0.795207	-0.0057455	0.00687197
Gm06_1266076	187.407	0.791797	0.026725	0.00542272	775.009	0.709134	-0.0451575	0.00623552	228.648	0.772471	-0.0313753	0.00617165	1449.61	0.728122	-0.0866058	0.00705224	1082.08	0.794853	-0.0696824	0.00805247
Gm06_1269352	229.684	0.791727	-0.054024	0.0052064	314.438	0.709186	0.0502019	0.00531873	111.572	0.772476	0.0419069	0.00587991	27.5608	0.728571	-0.024676	0.00672546	23.3244	0.795193	0.0194871	0.00700922
Gm06_1270948	6.31988	0.791852	0.00490076	0.00553474	439.424	0.709211	-0.033855	0.00574207	199.943	0.77248	-0.0293453	0.00644827	1488.59	0.728108	-0.087904	0.00739415	1926.5	0.794576	-0.0929454	0.00851162
Gm06_1275159	251.664	0.791718	-0.0554573	0.00526992	550.689	0.709095	0.0653368	0.00573663	142.617	0.77246	0.0463344	0.00542188	84.0602	0.728535	-0.0419024	0.00661691	33.39	0.795188	-0.0228077	0.00724401
Gm06_1278678	338.69	0.791669	-0.0650752	0.00521456	197.855	0.709233	0.0395743	0.00585153	142.195	0.772459	0.046886	0.00549828	57.6755	0.728551	-0.0353097	0.0066136	1.98503	0.795207	0.00563476	0.00676872
Gm06_1283495	239.024	0.79173	-0.0517533	0.00502132	1031.89	0.708919	0.0862815	0.00569516	154.63	0.772457	0.0459068	0.00525452	16.2172	0.728579	0.017353	0.00692946	256.859	0.795058	-0.0602184	0.00673963
Gm06_1289988	522.745	0.791585	-0.0760251	0.00528637	266.037	0.709211	0.0436059	0.00568945	430.24	0.772305	0.0760411	0.00506021	109.765	0.728523	-0.0448358	0.00617919	429.842	0.794959	-0.0773642	0.00629919
Gm06_1291042	256.226	0.791722	-0.0534794	0.00536526	395.14	0.709162	0.0533561	0.00562461	124.658	0.772474	0.0411532	0.00512099	29.8724	0.728571	-0.0235421	0.00663169	81.8214	0.79516	-0.0339359	0.00649063
Gm06_1292401	200.447	0.791757	-0.0442787	0.0054926	132.46	0.709265	0.0291082	0.0058076	53.4621	0.772515	0.0250347	0.00535231	5.67306	0.728586	0.00938581	0.00650796	159.47	0.795122	-0.0440368	0.00622961
Gm06_1293377	214.843	0.791792	0.0273164	0.00615293	539.156	0.709193	-0.0361061	0.00648221	617.495	0.772359	-0.0491861	0.00686379	993.773	0.728283	-0.0684399	0.00757736	1609.79	0.794704	-0.0810764	0.0078781
Gm06_1305886	78.5161	0.791815	-0.02801	0.005764	296.868	0.709205	0.044006	0.00542016	28.8072	0.772528	0.018584	0.00556728	34.9327	0.728569	0.0235751	0.00693714	23.1232	0.795195	0.0169582	0.00656908
Gm06_1320604	202.211	0.791754	-0.045533	0.00615934	311.094	0.709198	0.0454508	0.00566831	174.935	0.77245	0.046476	0.00572005	9.171	0.728584	-0.0122643	0.00646243	0.0956856	0.795208	-0.00110701	0.00674105
Gm06_1352333	0.96931	0.791853	0.00209999	0.00563658	1319.1	0.70898	0.0644922	0.00619264	877.163	0.772244	0.0669544	0.00575819	0.105805	0.728589	-0.00080082	0.00672686	11.2432	0.795204	-0.00774664	0.00742062
Gm06_1353916	944.731	0.791612	0.0508284	0.00642778	29.0124	0.709306	-0.00744574	0.00534292	71.2836	0.772524	-0.0148135	0.0056648	701.613	0.728398	-0.051021	0.00752449	1824.96	0.794701	-0.0765093	0.0068592
Gm06_1383751	369.341	0.791761	0.0314077	0.00574875	81.3667	0.709296	-0.012333	0.00581036	9.30798	0.77254	0.00528549	0.0054324	1227.1	0.728259	-0.066524	0.00799433	2134.96	0.794623	-0.0817058	0.00715922
Gm06_1403290	647.256	0.791689	0.0419413	0.00567439	161.822	0.70928	-0.0175358	0.00593231	13.6748	0.772539	0.00646829	0.00569182	1216.43	0.728258	-0.0669761	0.00875234	1562.89	0.794775	-0.07059	0.00681776
Gm06_1437894	804.613	0.79172	0.0304509	0.00527938	1011.47	0.70918	-0.0293697	0.00599496	1699.8	0.772257	-0.0459476	0.00579745	278.616	0.728543	-0.0196775	0.00757712	2047.97	0.794846	-0.0516092	0.0073641
Gm06_1511862	1567.11	0.791597	0.0419681	0.00556492	810.377	0.709207	0.0259757	0.0078551	179.785	0.772513	-0.0146827	0.00642714	1563.82	0.728335	0.0452507	0.00771529	176.148	0.795177	0.0148814	0.00652445
Gm06_1976435	2298.93	0.791653	0.0270654	0.00528366	68.057	0.709307	0.00411353	0.00750637	2754.25	0.772299	-0.0308883	0.00608926	5826.15	0.728071	0.0478982	0.00798401	2041.14	0.795017	0.0272028	0.00790394
Gm06_2541761	1036.92	0.791722	0.0265127	0.00538467	10563.3	0.708289	-0.0702708	0.00878166	1665.32	0.772321	-0.0361397	0.00657987	1725.03	0.728344	0.0416415	0.00775969	232.088	0.795175	-0.0137641	0.00644034
Gm06_2543972	1727.75	0.791629	0.0349569	0.00541726	8619.43	0.70846	-0.0647588	0.00858012	2662.28	0.772179	-0.0467818	0.00617146	1838.06	0.72832	0.0442263	0.00692883	650.186	0.795115	-0.023583	0.00658864
Gm06_2544366	1850.81	0.791613	0.0361769	0.00585713	8087.88	0.708512	-0.0627541	0.00857062	2522.59	0.772198	-0.0455295	0.00684001	2023.17	0.728293	0.0463727	0.00658308	416.364	0.795148	-0.0188691	0.00693236
Gm06_2599631	386.959	0.791808	0.0149963	0.00633702	315.855	0.709284	0.0113489	0.00806251	3338.88	0.772134	-0.046987	0.00659023	1399.47	0.728409	0.0338765	0.00630809	110.877	0.795194	-0.00874446	0.00657643
Gm06_3148779	2111.7	0.791512	0.0481067	0.00622906	178.027	0.70929	-0.0116402	0.00810603	823.121	0.772404	-0.0320815	0.00708009	321.534	0.728533	0.0222712	0.00608748	1909.61	0.79487	0.049866	0.00694021
Gm06_3161579	1343.28	0.79163	0.0396179	0.00635903	421.011	0.709259	0.0183266	0.00781284	1687.71	0.772247	-0.047758	0.00704028	298.45	0.728534	0.0226174	0.00623233	1867.8	0.794865	0.0512465	0.00679099
Gm06_3206343	1323.3	0.791655	0.0353395	0.00646514	187.346	0.70929	-0.0112375	0.00873735	1003.43	0.772388	-0.0324667	0.00715993	1.05646	0.728589	-0.00114357	0.00596091	2724.86	0.794766	0.0546545	0.00652664
Gm06_3258324	3307.75	0.791484	0.0416154	0.00691597	12096.3	0.708264	0.0672881	0.0105613	3688.25	0.772122	-0.0460483	0.00713326	13.9384	0.728588	-0.00304283	0.00636391	579.475	0.795138	0.018672	0.00597267
Gm06_3301988	4732.35	0.791006	0.0798959	0.00711253	36.083	0.709307	0.00571626	0.00723761	3852.38	0.77181	-0.0784325	0.00724937	315.753	0.728524	0.0258882	0.00669408	3.50506	0.795207	0.00241289	0.0057658
Gm06_3372411	5488.57	0.790865	0.0865216	0.00697831	209.339	0.709284	0.0138443	0.00670262	3635.51	0.771847	-0.0766623	0.00765585	467.166	0.728492	0.0317071	0.0062599	106.99	0.795186	0.0134116	0.005927
Gm06_3416319	3262.53	0.791277	0.0654406	0.00676249	0.0611004	0.709312	0.000232697	0.00683953	3449.94	0.771897	-0.0730133	0.00821452	90.3578	0.728571	-0.0135597	0.00669907	137.063	0.795181	0.0148441	0.00565385
Gm06_3433374	3171.46	0.791299	0.0637677	0.00670663	1.19586	0.709312	-0.00101897	0.00629746	3432.93	0.771909	-0.0718938	0.00872144	5.38312	0.728588	0.00325909	0.00624668	118.04	0.795185	0.0135994	0.00553137
Gm06_3457866	3902.06	0.791174	0.0705187	0.00744781	2.44964	0.709312	-0.00145468	0.00665978	4418.66	0.771729	-0.0812824	0.0100514	23.7645	0.728584	0.00682031	0.00639797	442.495	0.795122	0.0262442	0.00572895
Gm06_7231009	4551.95	0.79147	0.0368254	0.00635298	11608.4	0.708543	0.0503509	0.00879203	1474.74	0.772417	-0.0218411	0.00788225	198.99	0.728572	-0.00852169	0.00592292	1067.27	0.795112	0.0190095	0.00536566
Gm06_7558353	3434.75	0.791573	-0.0309798	0.0106313	723.771	0.709267	0.0119312	0.00640437	7428.71	0.77192	0.0480204	0.0146453	944.896	0.728508	-0.0186213	0.0076512	2690.48	0.79497	-0.0295469	0.00692382
Gm06_7892597	6805.15	0.791037	0.0641276	0.00641207	6418.51	0.708707	-0.0533076	0.009151	5596.24	0.771857	-0.0609024	0.00770347	798.75	0.72849	-0.0246452	0.00635306	421.014	0.795154	0.0170962	0.00586285
Gm06_7953241	772.421	0.791758	0.02238	0.00581335	219.23	0.709291	-0.00988432	0.00775611	630.819	0.77246	-0.0217743	0.00731074	6.00531	0.728588	-0.00240234	0.00594932	152.764	0.795187	0.0109295	0.00559601
Gm06_7964449	1079.27	0.79172	0.0264401	0.00545618	177.555	0.709295	-0.00888986	0.00679774	800.415	0.772438	-0.0245168	0.00660372	22.0453	0.728586	-0.00460183	0.00638595	281.795	0.795169	0.0148378	0.00579125
Gm06_7979282	269.812	0.791822	0.012423	0.00552331	5415.78	0.708833	0.0458976	0.00857292	221.945	0.772516	-0.0121651	0.00611943	77.6038	0.728579	0.00818644	0.00660874	208.676	0.795181	-0.0120272	0.00585639
Gm06_8001801	299.905	0.791819	0.0130963	0.00530986	5087.96	0.708862	0.0444728	0.00707384	244.688	0.772513	-0.0127717	0.00634666	92.9556	0.728577	0.00895821	0.00662114	148.249	0.795189	-0.0101364	0.00565362
Gm06_8109232	18.3894	0.791852	-0.00244586	0.00495397	4771.73	0.708988	-0.0330399	0.00682468	857.557	0.772465	-0.0177468	0.00651918	3020.59	0.728301	-0.0369198	0.00802147	196.718	0.795189	0.00867964	0.00567295
Gm06_8110754	18.2464	0.791852	-0.0024365	0.00530988	4644.71	0.708997	-0.0325999	0.0070797	800.771	0.77247	-0.0171504	0.00736573	2995.95	0.728304	-0.0367719	0.00833431	201.475	0.795189	0.00878456	0.00520029
Gm06_11331073	450.26	0.791808	-0.0140056	0.00550648	895.339	0.709241	-0.0168681	0.00591204	1697.99	0.772365	0.0286251	0.00770206	110.172	0.728577	-0.00794148	0.00643045	86.4834	0.795198	-0.00660383	0.00531931
Gm06_11366227	560.443	0.791797	-0.0156282	0.00516014	807.087	0.709248	-0.0160172	0.00563612	1671.52	0.772368	0.0284137	0.00717917	407.761	0.728545	-0.0152909	0.00635726	180.554	0.795188	-0.00954571	0.00560748
Gm06_11624680	1806.37	0.791485	-0.0561237	0.00511988	43.6322	0.709305	-0.0071843	0.00584739	1308.32	0.772262	0.0516251	0.00634667	206.513	0.728542	-0.0231958	0.00663177	10.8259	0.795206	0.00479027	0.00536634
Gm06_11631283	1003.04	0.791631	-0.0454748	0.00512536	368.461	0.709251	-0.0225187	0.00522912	1104.16	0.772283	0.0519684	0.00560891	13.1007	0.728586	0.00648914	0.00707761	374.931	0.795115	0.0308638	0.00621305
Gm06_11631435	2287.68	0.791381	-0.0640685	0.00556466	266.675	0.70927	-0.0179908	0.00570619	2191.05	0.772064	0.0678745	0.00594902	415.872	0.728492	-0.0335586	0.00793461	48.3908	0.795197	0.0102902	0.00570118
Gm06_11646999	253.181	0.791791	-0.0253342	0.00539324	710.064	0.709183	-0.034293	0.00539006	349.631	0.772451	0.0327496	0.00571428	962.748	0.72831	0.0634399	0.00872662	155.453	0.795165	0.022232	0.00614904
Gm06_11649914	314.168	0.791775	-0.0286209	0.00572711	343.277	0.709249	-0.0241357	0.0053417	290.366	0.772465	0.03033	0.00611209	392.252	0.728473	0.0413239	0.0080679	1.5375	0.795208	-0.00224655	0.00583813
Gm06_11660914	138.123	0.791823	0.0170877	0.00653674	656.631	0.709201	-0.03049	0.0052316	2.36428	0.772542	0.0024295	0.00645973	414.899	0.728483	0.0367152	0.00792065	187.805	0.795161	0.0220671	0.00601497
Gm06_11694871	1032.61	0.791605	-0.050106	0.00594769	293.145	0.709259	-0.0216786	0.00565774	1163.86	0.772243	0.0582797	0.00661649	43.6013	0.728577	-0.0130852	0.00842762	59.881	0.795192	-0.0134673	0.00618884
Gm06_11698583	567.679	0.791712	-0.0386054	0.00620929	307.1	0.709255	-0.0229042	0.00568752	483.473	0.772413	0.0392894	0.00675826	465.521	0.728451	0.0452411	0.0078674	2.63502	0.795207	0.00295257	0.00608728
Gm06_11701693	1141.49	0.791586	-0.0512314	0.00689438	91.2929	0.709296	-0.011811	0.00595193	632.582	0.772385	0.0416425	0.0074503	9.90391	0.728587	-0.00599912	0.00821445	142.994	0.795171	-0.0201728	0.00679544
Gm06_11708917	634.006	0.791706	0.0380704	0.0062648	712.051	0.709188	-0.0327549	0.00586259	777.656	0.772349	-0.0461595	0.00685181	1589.59	0.728157	0.0764521	0.00867849	686.204	0.795029	0.044161	0.00683924
Gm06_11728804	76.6274	0.791836	0.0128941	0.00560203	344.61	0.709253	-0.0222849	0.00587918	319.392	0.772466	-0.0287296	0.0058713	2238.54	0.728002	0.0875065	0.00889849	159.764	0.795167	0.0207011	0.00673045
Gm06_11737748	754.885	0.791678	0.0414476	0.00566126	650.361	0.709199	-0.0312536	0.0061366	698.307	0.772369	-0.0436594	0.00543664	1752.47	0.728113	0.0801683	0.01027	633.567	0.795043	0.0423524	0.00730934
Gm06_11738859	613.133	0.791712	0.0370915	0.00583645	305.861	0.709259	-0.0213139	0.00590369	1051	0.772283	-0.0531134	0.00545343	1636.46	0.72815	0.0766614	0.00946808	928.348	0.794968	0.0508442	0.00750852
Gm06_11747225	477.611	0.791742	0.0330081	0.00602724	539.944	0.709218	-0.028507	0.00669112	483.722	0.772422	-0.0363861	0.00585203	1226.98	0.728255	0.0672042	0.00916895	895.932	0.794974	0.050423	0.00781019
Gm06_11776489	1.08944	0.791854	-0.00116763	0.00620058	187.855	0.709287	0.0127377	0.00604936	313.233	0.772487	-0.021136	0.00536376	485.271	0.728499	-0.0290308	0.00811255	2228.74	0.794787	-0.0575299	0.00804457
Gm06_12430007	8465.5	0.791084	0.0542316	0.0113063	3083.85	0.709089	0.0283556	0.00598522	4470.49	0.772134	-0.0405575	0.00825311	633.94	0.728532	-0.0159104	0.00771206	91.6755	0.795199	-0.00595173	0.00599619
Gm06_13360950	144.762	0.791826	-0.0149132	0.00673652	2513	0.708951	0.0508098	0.00659481	539.243	0.772433	0.0313044	0.00597526	2.68281	0.728589	0.00253414	0.00715093	565.24	0.795088	0.0326591	0.00579737
Gm06_13393396	269.801	0.7918	-0.021347	0.00695378	2719.92	0.708905	0.055038	0.00621634	526.304	0.77243	0.0326765	0.00621261	31.4733	0.728582	-0.00932221	0.00605003	63.6287	0.795194	0.0115705	0.00577598
Gm06_13400813	226.542	0.791808	-0.0196409	0.00581028	2131.85	0.708992	0.0488991	0.00632613	602.492	0.772413	0.0350996	0.00589128	24.3077	0.728583	-0.00822312	0.00547793	158.604	0.795172	0.0183399	0.00567681
Gm06_13432992	213.268	0.79181	-0.0193762	0.00521983	1866.74	0.709028	0.0464206	0.0066548	443.184	0.772446	0.0306961	0.00515008	9.89131	0.728587	-0.00538012	0.00587193	127.56	0.795179	0.0167659	0.0060224
Gm06_13472544	202.851	0.791812	-0.018889	0.0052138	1417.95	0.709096	0.040447	0.00698178	427.394	0.772449	0.0301297	0.00549035	13.0283	0.728586	-0.00617031	0.00569506	99.6138	0.795185	0.0148089	0.00618532
Gm06_13539106	447.325	0.791763	-0.0279155	0.00509066	1537.22	0.709079	0.041965	0.00762752	306.057	0.772476	0.0253411	0.00561304	29.1348	0.728582	0.0091416	0.00568392	29.5879	0.795201	0.00802267	0.00633419
Gm06_13562776	247.718	0.791816	0.0157008	0.0050796	3666.18	0.708874	-0.051042	0.00942729	163.461	0.772517	0.0134565	0.00590412	76.7409	0.728577	-0.0100162	0.00590614	3692.82	0.794593	0.0653115	0.00746884
Gm06_13602123	589.855	0.791737	-0.0312531	0.00527549	3950.15	0.708726	0.0657957	0.00867807	237.192	0.772493	0.021651	0.00574942	55.612	0.728576	0.012135	0.00623156	242.647	0.795154	-0.0223057	0.00719533
Gm06_13653756	263.411	0.791809	-0.0179945	0.00475435	453.961	0.709253	0.0196096	0.00772278	3.35646	0.772542	0.00217411	0.00640034	484.072	0.728499	0.0290475	0.00646155	287.759	0.795154	-0.0205432	0.00729045
Gm06_13711277	95.6439	0.79184	0.00926144	0.00476557	5445.92	0.708693	-0.0591859	0.00907275	1241.5	0.772356	0.0351119	0.00864103	689.749	0.728484	-0.028321	0.00632986	1759.59	0.79493	0.0427209	0.00965999
Gm06_13872095	226.383	0.791819	-0.0148745	0.00491493	15.7115	0.70931	-0.00329483	0.00736968	200.756	0.772511	-0.014774	0.00601381	182.741	0.72856	0.0152639	0.00581887	709.948	0.795091	-0.0283902	0.0073304
Gm06_14104090	906.998	0.791745	0.0232833	0.00512973	3227.5	0.709006	0.0380341	0.00695797	5121.8	0.771924	-0.0574554	0.00826507	389.295	0.728542	-0.0167965	0.00560156	6842.51	0.794337	-0.0679353	0.00872692
Gm06_14716659	1474.86	0.791667	0.0315273	0.00499211	7244.39	0.708581	0.0605717	0.0072933	962.149	0.772418	-0.0266745	0.00572337	11.773	0.728588	0.00318408	0.00550148	1178.38	0.795047	-0.0301823	0.00753479
Gm06_14723656	1078.52	0.791717	0.0268801	0.00467377	7491.63	0.708559	0.0614147	0.00660162	789.975	0.772441	-0.0240917	0.00531444	11.8555	0.728588	0.00318318	0.0051578	1509.07	0.795003	-0.0340426	0.00669272
Gm06_15952453	70.6235	0.791848	0.00466663	0.00458297	70.6623	0.709307	0.0040592	0.00617209	1055.12	0.772452	0.0185443	0.00512369	422.296	0.728554	0.0122338	0.00586367	848.538	0.795131	-0.0170336	0.00763229
Gm06_16390870	170.45	0.791798	-0.0274905	0.00482026	99.1175	0.709287	-0.0176087	0.00559485	38.1025	0.77253	0.0141779	0.00463299	126.281	0.728542	-0.0298386	0.00568367	256.874	0.795115	0.0374973	0.00737739
Gm06_16465487	141.797	0.791806	-0.0259207	0.00502931	5.26588	0.709311	-0.00416534	0.00572035	122.413	0.772499	0.0263798	0.00476145	215.569	0.728504	-0.0408307	0.00546071	348.113	0.795077	0.0452942	0.00673771
Gm06_16491296	166.746	0.791799	-0.0274868	0.00483626	1.89203	0.709312	-0.00245014	0.00565833	198.57	0.772473	0.03278	0.00468589	456.152	0.728415	-0.0576773	0.00572679	618.813	0.794981	0.0589268	0.00698964
Gm06_16522137	1.61845	0.791853	-0.00278146	0.00502478	0.615091	0.709312	-0.00142901	0.00577805	4.51725	0.772541	0.00509404	0.00471563	166.54	0.728523	-0.0361373	0.0058686	598.164	0.794982	0.0596691	0.00649583
Gm06_16525236	0.00226231	0.791854	0.000102757	0.00509951	48.8579	0.7093	0.0125873	0.00573833	0.662488	0.772543	0.0019241	0.00487534	54.8449	0.728568	-0.0203728	0.00617709	461.675	0.795036	0.0517163	0.00608275
Gm06_16567546	0.409897	0.791854	0.00140122	0.00513109	67.7706	0.709295	-0.0150509	0.00602315	4.31101	0.772541	-0.00497952	0.00498062	172.62	0.728521	-0.0367794	0.00593781	560.022	0.794996	0.0577749	0.00610223
Gm06_16567730	0.054538	0.791854	0.000514504	0.0050268	26.4854	0.709305	-0.00943913	0.00569769	0.956209	0.772543	-0.00236244	0.00500576	144.613	0.728531	-0.0339653	0.00618488	594.627	0.794981	0.0599663	0.00585193
Gm06_16568411	12.3429	0.79185	0.00765874	0.00478831	0.622273	0.709312	0.00143273	0.00562243	4.89751	0.772541	0.00528387	0.00495538	399.336	0.728432	-0.0556267	0.00626802	554.912	0.794999	0.0572583	0.00611036
Gm06_16605626	99.3004	0.79182	0.0216902	0.00466708	0.968911	0.709312	0.00178815	0.00557863	17.1849	0.772537	0.00985701	0.00498211	431.977	0.72842	-0.057255	0.00619164	293.877	0.795098	0.0415132	0.00606039
Gm06_16605786	33.9615	0.791842	0.0130241	0.00499207	2.09453	0.709312	-0.00268982	0.00557689	4.95493	0.772541	0.00545351	0.00499343	726.639	0.728295	-0.0770775	0.00635029	349.163	0.795073	0.0466058	0.00574676
Gm06_16606140	0.76168	0.791853	0.00194447	0.00472939	32.143	0.709304	0.0105069	0.00607775	1.11386	0.772542	-0.00257647	0.00485968	221.978	0.7285	-0.0424241	0.00595076	500.16	0.795015	0.0555801	0.00591277
Gm06_16619208	97.2325	0.791821	0.0215682	0.00465186	23.3166	0.709306	0.00887086	0.00596584	32.6053	0.772531	-0.0136481	0.00485816	7.9207	0.728586	-0.00780084	0.00636801	473.155	0.795029	0.0529439	0.00589479
Gm06_16638723	29.3124	0.791844	0.0117231	0.00442908	27.2798	0.709305	0.00958306	0.00584488	1.74056	0.772542	-0.00311402	0.00508383	128.211	0.72854	-0.0308234	0.0058455	411.172	0.795055	0.0487513	0.00606409
Gm06_16651512	38.3905	0.791842	0.0124204	0.00450397	1051.33	0.709056	0.0557087	0.0062285	42.9748	0.772529	-0.0141784	0.00488762	309.056	0.728482	0.042939	0.00622804	1186.58	0.794802	0.0759391	0.00718665
Gm06_16664781	2.37865	0.791853	0.00171552	0.00469578	966.465	0.70918	0.0299075	0.00617078	369.554	0.772479	0.0221194	0.0054585	545.877	0.728496	-0.0282131	0.00603041	2559.45	0.794741	0.0595631	0.00669802
Gm06_16710123	28.2664	0.791846	-0.00993248	0.00466558	90.9689	0.709291	-0.0156516	0.0061551	524.176	0.772387	0.0453158	0.00523946	13.3678	0.728585	-0.0078919	0.00568386	219.364	0.795139	0.0299502	0.0073555
Gm06_16730377	350.565	0.791753	0.0349737	0.00500495	341.384	0.709233	-0.030258	0.00649374	78.1826	0.77252	-0.0171766	0.00476594	1589.52	0.728128	-0.081538	0.00716955	1066.54	0.794879	-0.0648966	0.00784612
Gm06_16744659	149.781	0.791822	0.0170363	0.00511064	3.20062	0.709312	-0.00212792	0.005316	0.00278684	0.772543	7.66409e-05	0.004797	6.14089	0.728588	-0.00382768	0.00612969	559.883	0.795079	-0.0351363	0.0069802
Gm06_16979850	361.127	0.791762	0.0312199	0.00534062	19.5885	0.709308	0.00617358	0.00544448	3.34346	0.772542	-0.00314208	0.00491339	172.573	0.728544	-0.024117	0.00611736	885.137	0.794967	-0.0522714	0.00750053
Gm06_17039835	60.6805	0.79184	0.0116879	0.00510184	70.0762	0.7093	0.0106011	0.00573676	2.11823	0.772542	-0.00230189	0.00473579	602.536	0.728443	-0.0420111	0.00633458	146.256	0.795171	-0.0195476	0.00681077
Gm06_17170770	197.437	0.79178	-0.0341827	0.00526929	162.387	0.709265	0.0259706	0.00551204	29.3296	0.772531	0.0139919	0.00471325	11.963	0.728584	0.00979957	0.00622861	230.439	0.795114	-0.0400516	0.00639642
Gm06_17177910	1708.87	0.791392	-0.0722934	0.00583211	662.831	0.709175	0.0376464	0.00589546	67.6487	0.772524	0.01525	0.00441132	107.018	0.728558	-0.0210142	0.00608477	29.6992	0.795199	0.0103217	0.00707412
Gm06_17182098	72.5025	0.791829	-0.0191191	0.00474742	90.6562	0.709287	0.0183544	0.00577453	103.641	0.772506	-0.0237963	0.0047136	176.318	0.728527	-0.0328438	0.00584642	171.851	0.795144	-0.0313522	0.00600756
Gm06_17182458	133.162	0.791796	-0.0325079	0.00524005	1.69292	0.709312	-0.00303588	0.00580383	16.1894	0.772535	0.0121902	0.00454748	1.5587	0.728588	-0.00425057	0.0058382	0.00559033	0.795208	0.00023108	0.00619085
Gm06_17185767	796.912	0.791592	-0.0601239	0.00486666	924.665	0.709081	-0.0536067	0.00590318	59.4358	0.772522	0.0175989	0.00425255	486.966	0.728413	-0.0563908	0.00601829	1.83915	0.795207	0.00315905	0.00624682
Gm06_17186464	1008.39	0.791524	-0.067201	0.00502529	1026.79	0.709057	-0.056198	0.00545862	126.348	0.7725	0.0254617	0.0044062	438.756	0.728432	-0.0529646	0.00618575	0.0102883	0.795208	-0.000234493	0.00625748
Gm06_17187144	963.686	0.791537	-0.0659984	0.00508007	819.835	0.709107	-0.0504254	0.00577831	139.577	0.772495	0.0269019	0.00457303	308.434	0.728478	-0.0447009	0.00575797	3.4899	0.795207	-0.00434124	0.00637509
Gm06_17192375	912.465	0.791554	-0.0643028	0.0051907	710.051	0.709135	-0.046969	0.00533734	30.8138	0.772532	0.0126612	0.00483732	407.054	0.728442	-0.0514749	0.00546297	4.36162	0.795206	0.00486096	0.00654814
Gm06_17194897	1068.13	0.791502	-0.0696607	0.00513016	741.034	0.709127	-0.0480539	0.00499278	76.5584	0.772517	0.0199796	0.0045593	257.503	0.728496	-0.0409721	0.00558842	14.7209	0.795203	0.00894062	0.00675991
Gm06_17204660	2.8215	0.791853	0.00453059	0.00511797	1.58726	0.709312	-0.00285104	0.00559966	2.54807	0.772542	0.0046016	0.00473921	38.4956	0.728572	-0.0198474	0.00516462	60.0208	0.795181	-0.0227952	0.00621717
Gm06_17205871	49.1974	0.791816	0.0350778	0.00534457	58.8484	0.709278	-0.0314086	0.00505399	41.0075	0.772509	-0.0347971	0.00464039	28.0087	0.728565	-0.0327185	0.0053566	662.087	0.79464	-0.142414	0.00639968
Gm06_17207226	50.0672	0.791815	0.035149	0.00505322	56.5307	0.70928	-0.030583	0.00545078	25.5002	0.772522	-0.0272463	0.00456747	48.3699	0.728547	-0.0426694	0.00536537	530.853	0.794756	-0.126642	0.00571352
Gm06_17208342	78.4808	0.791793	0.0446712	0.00490223	55.4275	0.70928	-0.030707	0.00529634	55.6075	0.772497	-0.040899	0.00453205	26.6727	0.728566	-0.0322937	0.00563473	681.483	0.794618	-0.145818	0.00552382
Gm06_17208996	5.37979	0.791851	-0.00678845	0.00468454	71.5384	0.709288	0.0205247	0.00549298	16.284	0.772535	-0.0127106	0.004492	5.12076	0.728587	0.00801737	0.0054484	29.2953	0.795193	-0.0173899	0.00543009
Gm06_17210013	38.4805	0.791827	0.0282798	0.00481803	24.5557	0.709299	-0.018646	0.00554053	83.806	0.772481	-0.0448828	0.0045068	0.0604088	0.728589	-0.00134409	0.00569999	376.807	0.794916	-0.0970679	0.00511236
Gm06_17215916	21.1083	0.791837	0.0233167	0.00458943	8.20401	0.709307	-0.0118792	0.00527343	3.92681	0.77254	-0.0109482	0.00448784	10.3582	0.72858	-0.0203041	0.00550261	396.392	0.794862	-0.112046	0.0053992
Gm06_17217290	0.795509	0.791853	0.00239317	0.00448221	0.232773	0.709312	0.00108024	0.00551726	1.20155	0.772542	0.00313867	0.00476816	21.594	0.72858	0.0147202	0.00503751	0.00813415	0.795208	-0.000263633	0.00525645
Gm06_17217786	1.91158	0.791853	-0.00395826	0.00453947	121.425	0.709271	0.0262595	0.00531401	0.504392	0.772543	-0.00218279	0.00442526	60.687	0.72856	0.0267938	0.00506411	72.3627	0.795173	0.026674	0.00545576
Gm06_17222599	104.138	0.791772	0.0516824	0.00457641	36.7185	0.709291	-0.0250778	0.00554732	50.7649	0.772501	-0.0392849	0.00451878	26.5286	0.728566	-0.0324299	0.00515865	232.262	0.795006	-0.0856136	0.00587719
Gm06_17231151	156.018	0.791785	0.0358434	0.0047096	29.126	0.709302	0.0128807	0.00520268	225.522	0.772438	-0.0462237	0.00457034	136.495	0.728523	0.0401769	0.00516955	92.9978	0.795163	0.0302899	0.0060121
Gm06_17233453	72.599	0.791794	0.0457408	0.00473782	2.00058	0.709311	-0.0061718	0.00513366	79.711	0.772472	-0.0524886	0.00462632	0.0414654	0.728589	-0.00138287	0.00543553	187.136	0.795034	-0.0818994	0.00582926
Gm06_17242471	38.9608	0.791822	0.033201	0.00486148	1.44067	0.709311	0.00519276	0.00508519	46.54	0.772502	-0.0397008	0.00478959	0.0809872	0.728589	-0.00190929	0.0055166	191.357	0.795032	-0.0819837	0.00617588
Gm06_17258654	192.154	0.791692	0.0757782	0.00486037	7.9432	0.709307	-0.0125043	0.00515897	155.644	0.772402	-0.0748236	0.00497914	15.0905	0.728574	-0.0269998	0.00540765	50.7264	0.79516	-0.0435034	0.00629577
Gm06_17274254	158.045	0.791715	0.0716252	0.00530525	88.6703	0.709254	-0.0433894	0.00529638	129.552	0.77242	-0.0714363	0.00487568	46.0231	0.728541	-0.0497179	0.00578863	37.2965	0.795171	-0.0390206	0.00595599
Gm06_17279685	158.419	0.791723	0.0672138	0.00509715	5.98722	0.709308	-0.0106198	0.00521046	151.384	0.77241	-0.0719112	0.00502061	4.15219	0.728585	-0.013735	0.00546258	9.62386	0.795199	-0.0184706	0.00622606
Gm06_17282043	149.199	0.791723	0.0694807	0.0052954	68.4778	0.709267	-0.0380589	0.0055185	189.295	0.772364	-0.0862201	0.00474596	10.7684	0.728578	-0.0240253	0.00575541	38.1524	0.79517	-0.0394083	0.00623724
Gm06_17303005	50.9555	0.791807	0.0426031	0.00505816	51.1023	0.709277	-0.034281	0.00545861	40.8683	0.772502	-0.0422907	0.00481818	0.167653	0.728589	0.00320183	0.00565299	13.8104	0.795194	-0.0250107	0.00598042
Gm06_17304165	7.59053	0.791847	0.0161074	0.00524796	10.9366	0.709305	-0.0155771	0.00543144	2.71457	0.77254	-0.0106399	0.00502212	0.00227716	0.728589	0.000361553	0.00550296	5.10669	0.795203	-0.0148511	0.00608725
Gm06_17314135	5.34458	0.791849	0.013665	0.00545618	67.5958	0.709267	-0.0390991	0.00587599	20.1049	0.772523	-0.0293186	0.00487286	4.51883	0.728584	0.0163575	0.00553743	12.9093	0.795195	-0.023905	0.00606019
Gm06_17317618	16.9813	0.791838	0.0248505	0.00510531	45.9188	0.709281	-0.0328047	0.00520739	33.1869	0.772509	-0.03854	0.00528486	2.28984	0.728587	0.0119838	0.00551248	25.3557	0.795181	-0.0342683	0.00566575
Gm06_17320283	9.70546	0.791845	0.0187156	0.00495874	61.4991	0.70927	-0.0378454	0.00538187	0.194086	0.772543	-0.00293405	0.00506932	0.050153	0.728589	-0.00176286	0.0055749	16.6964	0.79519	-0.0276838	0.00565405
Gm06_17322958	38.6429	0.791819	0.0366122	0.00498647	73.0424	0.709263	-0.0405178	0.00532056	29.9844	0.772513	-0.0356573	0.00495364	1.50166	0.728588	-0.00938095	0.00555542	20.7585	0.795187	-0.0301904	0.00574112
Gm06_17323690	12.6777	0.791842	0.0216868	0.00493653	15.8201	0.709301	-0.0194358	0.00534828	13.6359	0.772529	-0.0249763	0.00472351	2.05655	0.728587	0.0115043	0.00523651	12.3005	0.795195	-0.0241284	0.00556029
Gm06_17326253	18.7572	0.791836	0.0263902	0.00471178	6.1596	0.709308	-0.0121302	0.0056668	27.8699	0.772514	-0.035731	0.00467766	2.85458	0.728586	0.0135707	0.00545268	12.314	0.795195	-0.0241577	0.00578843
Gm06_17331959	31.7815	0.791825	0.0329861	0.0048666	70.442	0.709265	-0.0395446	0.00548375	6.84514	0.772536	-0.0169222	0.00470912	3.00983	0.728586	-0.0131885	0.00534315	14.2227	0.795193	-0.0248213	0.00592973
Gm06_17336547	0.432859	0.791853	0.00397839	0.00487769	17.3343	0.7093	-0.020208	0.00541546	8.52486	0.772534	-0.0195888	0.00470172	44.108	0.72854	0.052747	0.00559425	9.15073	0.795198	-0.0206447	0.00582013
Gm06_17339232	31.3799	0.791827	-0.0311954	0.00508071	33.5563	0.709291	-0.0259996	0.00540974	28.6039	0.772517	0.0326716	0.00467483	2.39676	0.728587	-0.0108562	0.00551633	9.17179	0.795199	-0.0188405	0.0056564
Gm06_17343138	0.0530493	0.791854	0.00141498	0.00500735	12.5892	0.709303	-0.0174629	0.00544531	0.212376	0.772543	-0.00314719	0.00468024	46.8728	0.728535	0.0555536	0.00564143	10.5611	0.795197	-0.0225714	0.00597657
Gm06_17345719	14.0664	0.79184	-0.0233845	0.00494662	11.3238	0.709304	-0.0167801	0.00548284	4.388	0.772538	0.0145487	0.00466467	35.4865	0.728547	0.0493684	0.00568029	18.6633	0.795188	-0.0305092	0.00554429
Gm06_17347239	28.1234	0.791827	-0.0330607	0.00516345	10.2488	0.709305	-0.0159607	0.00543983	2.83702	0.77254	0.0116981	0.00459686	95.0526	0.728477	0.0808133	0.00539434	8.70561	0.795198	-0.0208367	0.00575042
Gm06_17347722	25.0927	0.79183	-0.0311953	0.00526212	32.1937	0.709289	-0.0282668	0.0055414	9.56976	0.772533	0.021454	0.00459493	111.528	0.728458	0.087333	0.00532623	9.18922	0.795198	-0.0213777	0.00589519
Gm06_17347996	28.1234	0.791827	-0.0330607	0.00503378	10.2488	0.709305	-0.0159607	0.00541298	2.83702	0.77254	0.0116981	0.00483254	95.0526	0.728477	0.0808133	0.00541302	8.70561	0.795198	-0.0208367	0.00551371
Gm06_17352056	20.8301	0.791834	-0.0284632	0.00496902	9.26517	0.709306	-0.0151791	0.00526345	0.420089	0.772542	0.00450354	0.00488626	86.7094	0.728487	0.077233	0.00540045	5.10971	0.795202	-0.0159707	0.005873
Gm06_17364425	17.9613	0.791836	-0.0264247	0.00498651	6.3263	0.709308	-0.0125395	0.00519946	0.730503	0.772542	0.00593743	0.0048161	70.5401	0.728506	0.0696476	0.00576758	2.88702	0.795205	-0.012002	0.00576484
Gm06_17367493	8.1633	0.791846	-0.017859	0.00464715	0.299944	0.709312	-0.00273646	0.00541031	0.292042	0.772543	0.00376473	0.00489752	55.2453	0.728524	0.0618532	0.00558527	0.638615	0.795207	-0.00566058	0.00564326
Gm06_17374895	0.888066	0.791853	-0.00552662	0.00479969	9.6402	0.709306	-0.014651	0.00530809	0.050328	0.772543	0.00145398	0.0050078	8.65647	0.72858	0.0223913	0.00543665	11.4807	0.795196	-0.0223469	0.00561149
Gm06_17379063	32.3623	0.791823	-0.0348612	0.00483316	1.09317	0.709311	0.00513201	0.00531238	4.82796	0.772538	0.014967	0.00500299	43.0058	0.72854	0.0530654	0.00571221	37.8105	0.795167	-0.0425975	0.00561808
Gm06_17381926	76.6479	0.791782	-0.0531391	0.00446625	1.70396	0.709311	-0.00635253	0.00552672	16.9953	0.772526	0.027781	0.00483104	39.8799	0.728544	0.0504243	0.00534543	45.6418	0.795159	-0.0463065	0.00573409
Gm06_17388172	1.48125	0.791853	-0.00554347	0.00442828	59.5232	0.709281	-0.0287998	0.00551369	33.7598	0.772518	0.0284487	0.0051245	4.58387	0.728586	-0.0116042	0.00545293	106.796	0.795125	0.0516219	0.00654036
Gm06_17388707	170.769	0.791724	-0.0644639	0.00454928	198.957	0.709198	-0.0571751	0.00556326	248.78	0.772343	0.0843021	0.00498871	82.1269	0.728519	0.054714	0.00539652	86.2119	0.795135	-0.0506044	0.00616475
Gm06_17389383	2.41942	0.791851	-0.00944631	0.00450327	33.8861	0.709289	-0.0283705	0.00527472	3.3302	0.77254	0.0122967	0.00473579	55.7698	0.728526	0.0595535	0.00557949	65.6349	0.795138	-0.0555269	0.00580072
Gm06_17392599	4.19261	0.79185	-0.0124854	0.00449918	35.0712	0.709288	-0.0289525	0.0051667	14.1659	0.772528	0.0254934	0.00474757	66.1036	0.728514	0.0653482	0.0055822	35.4913	0.79517	-0.0410413	0.00610044
Gm06_17396437	28.4324	0.791828	-0.030954	0.00459839	0.0964717	0.709312	0.00145216	0.00524834	14.2231	0.772529	0.0241746	0.00477665	55.815	0.72853	0.0561363	0.00535025	0.276375	0.795208	-0.00342955	0.00564638
Gm06_17397549	3.38264	0.79185	-0.0114779	0.00499679	3.96278	0.709309	-0.00993489	0.00522145	8.49285	0.772534	0.0202624	0.00485446	25.6511	0.728559	0.0420358	0.00535537	27.1916	0.795178	-0.0368651	0.00552483
Gm06_17397767	2.39758	0.791851	-0.00967265	0.00522131	9.91988	0.709305	-0.0157374	0.00522141	24.6992	0.772517	0.0345869	0.0046352	4.23785	0.728584	0.0171022	0.00550287	17.1747	0.795189	-0.0293268	0.00580769
Gm06_17398248	0.297705	0.791853	-0.00338935	0.00513655	17.9908	0.709299	-0.0210889	0.00538724	24.6425	0.772517	0.0343254	0.00474194	14.2964	0.728573	0.0311548	0.00535384	10.5743	0.795196	-0.0228658	0.00579072
Gm06_17398558	0.00367875	0.791854	-0.000372106	0.00525872	6.66793	0.709307	-0.0126993	0.00547693	3.78796	0.772539	0.0132688	0.00473453	3.75355	0.728585	0.0156823	0.00544272	13.8114	0.795193	-0.0257688	0.00559184
Gm06_17399207	0.0436127	0.791854	-0.00130635	0.00512174	3.83855	0.709309	-0.00980135	0.00520392	15.5488	0.772527	0.0274862	0.00462724	1.82068	0.728587	0.0112322	0.00506784	18.0882	0.795188	-0.0301438	0.00565329
Gm06_17407746	0.661317	0.791853	-0.00468921	0.00525031	4.63514	0.709309	-0.0100189	0.00565714	0.678982	0.772542	0.00523529	0.00472458	39.6653	0.728548	0.0466851	0.0049992	47.1814	0.795161	-0.0444204	0.00557894
Gm06_17412836	3.56748	0.791851	0.0110472	0.00539888	8.56558	0.709306	-0.0137918	0.00565225	4.51782	0.772538	-0.0137259	0.00477704	33.2965	0.728553	0.0436609	0.00522603	29.3878	0.795178	-0.0356264	0.00570185
Gm06_17413145	1.71152	0.791852	-0.00748087	0.00497995	9.18239	0.709306	-0.0139983	0.00563665	0.0114786	0.772543	-0.00067419	0.00464337	23.0838	0.728565	0.0351883	0.00562601	25.9223	0.795182	-0.0326154	0.00550346
Gm06_17422864	64.7285	0.791801	0.0421597	0.00488461	33.6932	0.709292	-0.0247537	0.00545479	65.0942	0.772487	-0.0461235	0.00494409	12.7079	0.728577	0.0233387	0.00513072	37.9456	0.795174	0.0358808	0.00551234
Gm06_17423758	22.4241	0.791835	0.0254811	0.00490132	8.76345	0.709307	-0.0129338	0.00534945	60.3961	0.772489	-0.0457578	0.00494834	52.4608	0.728539	0.0491336	0.00505379	47.0161	0.795164	0.0411227	0.00568454
Gm06_17425294	1.50384	0.791853	0.0065789	0.00461157	31.7751	0.709293	-0.0245614	0.00530967	21.3217	0.772524	-0.0271009	0.00471929	72.179	0.72852	0.057434	0.00517716	1.69084	0.795206	0.00777378	0.00587468
Gm06_17430302	11.3204	0.791845	0.0175428	0.00456504	71.2399	0.709269	-0.0358497	0.00532244	13.3925	0.772531	-0.020806	0.00457819	97.0947	0.7285	0.0641083	0.00532961	0.748109	0.795207	-0.0050105	0.00612207
Gm06_17443956	54.15	0.791829	-0.0217628	0.00446818	13.0677	0.709308	-0.00894756	0.00529748	43.0175	0.772522	0.0206656	0.00451455	272.923	0.728455	0.0571704	0.00529567	610.327	0.794904	0.0794544	0.00672781
Gm06_17451903	72.469	0.791817	-0.0282687	0.0042552	80.8385	0.70928	0.0248189	0.00512162	123.383	0.772476	0.0397062	0.00437822	202.297	0.728474	0.0569768	0.00512094	78.8557	0.795163	0.0323817	0.00603766
Gm06_17474636	86.0385	0.79181	-0.0308327	0.0044716	83.8677	0.709279	0.0252792	0.00523447	116.316	0.77248	0.0386449	0.00449151	116.579	0.728523	0.0434943	0.00513199	94.5445	0.795154	0.0355366	0.00586933
Gm06_17509787	35.1974	0.791827	0.0293119	0.00453187	242.324	0.709173	-0.0629158	0.00545176	11.9483	0.772533	-0.0185379	0.00435622	108.122	0.728496	0.0633095	0.00517962	2.65297	0.795206	-0.0089042	0.00534694
Gm06_17514285	98.7845	0.791802	-0.0333834	0.00438945	9.3413	0.709308	0.0085214	0.00539896	128.828	0.772473	0.0411274	0.00479482	110.938	0.728525	0.042965	0.00487093	70.3159	0.795168	0.0309898	0.00530154
Gm06_17526880	37.2796	0.791825	0.0302418	0.00436995	139.979	0.709232	-0.0479321	0.0051864	3.21044	0.77254	-0.00963611	0.00469339	78.7619	0.728521	0.0542149	0.00493132	1.16331	0.795207	-0.00591253	0.00544976
Gm06_17532797	52.9416	0.791814	0.035394	0.00449491	118.997	0.709245	-0.043489	0.00505825	6.50928	0.772538	-0.0134431	0.00457572	106.574	0.728499	0.0614822	0.00503955	5.08775	0.795204	-0.0121172	0.0051504
Gm06_17540096	26.0729	0.791834	0.0247539	0.00467274	150.242	0.709227	-0.0486994	0.00548098	2.04576	0.772541	-0.00751285	0.00453981	12.8494	0.728578	0.0213038	0.00515792	4.51064	0.795204	-0.0113733	0.00503139
Gm06_17549770	50.0095	0.791817	0.0337351	0.00440938	76.466	0.70927	-0.0342324	0.00487742	6.71234	0.772538	-0.0133723	0.00462331	66.3349	0.728534	0.0474343	0.00510646	0.139125	0.795208	0.00196302	0.00528361
Gm06_17560168	24.9585	0.791841	-0.0165349	0.00437542	22.8239	0.709303	0.0131754	0.00549968	89.899	0.772495	0.0338203	0.00469823	9.77398	0.728584	0.012534	0.00542805	137.463	0.79513	0.0426545	0.00519968
Gm06_17570174	38.6809	0.791834	-0.0208484	0.0047051	0.0754278	0.709312	-0.000762033	0.0053389	133.362	0.77247	0.0417992	0.00436988	246.593	0.728446	0.0641219	0.00540877	121.951	0.795138	0.040762	0.00507839
Gm06_17580361	35.6252	0.791835	-0.0201894	0.00457145	1.55589	0.709312	-0.00348968	0.00565954	143.962	0.772464	0.0438495	0.00445825	126.688	0.728515	0.046454	0.00527028	59.3058	0.795174	0.0287011	0.00528164
Gm06_17604704	22.945	0.791842	-0.0159529	0.0046573	27.3825	0.709301	0.0144265	0.00573029	40.421	0.772521	0.0228514	0.00483981	247.542	0.728447	0.0636984	0.00513966	148.125	0.795124	0.044609	0.00570588
Gm06_17609228	31.1818	0.791832	0.0246404	0.00442336	190.709	0.709214	-0.0503442	0.00572257	14.4614	0.772533	-0.0180196	0.00446371	88.1807	0.728523	0.0494971	0.005324	70.5308	0.795155	-0.0406036	0.00542447
Gm06_17614477	33.7482	0.791836	-0.0194943	0.0047277	4.34974	0.70931	0.00580502	0.00576596	88.5581	0.772495	0.0340858	0.00464184	359.134	0.728381	0.0773098	0.00550802	23.9326	0.795194	0.0180718	0.00582894
Gm06_17622342	87.1174	0.791805	-0.0340553	0.00465116	25.9656	0.709301	-0.0154086	0.00541275	0.857178	0.772542	-0.00365781	0.00490732	58.4821	0.728552	0.0341956	0.00514659	110.789	0.795139	-0.042394	0.00569387
Gm06_17628651	0.24065	0.791854	0.00184448	0.00523412	8.15377	0.709309	-0.00876243	0.00529695	21.3624	0.77253	-0.0189837	0.00477714	26.8904	0.728571	0.0245763	0.00543942	49.8916	0.795176	-0.0295521	0.00560372
Gm06_17643118	0.000830398	0.791854	0.000108482	0.00491787	2.71016	0.709311	0.00505747	0.0053467	21.0989	0.77253	-0.0188913	0.00476869	4.15824	0.728586	0.00967902	0.0059126	96.9026	0.795145	-0.0412378	0.00596212
Gm06_17650221	0.00266209	0.791854	-0.000195482	0.00477013	0.0114048	0.709312	0.000330039	0.00513373	23.5073	0.772528	-0.0200817	0.00479537	6.61781	0.728585	0.0123134	0.00590562	56.2189	0.795171	-0.0316318	0.00579663
Gm06_17656699	2.5797	0.791852	-0.00601766	0.00495114	0.023976	0.709312	0.000473569	0.00536989	20.148	0.77253	-0.0183692	0.00476713	38.8209	0.728563	0.0294167	0.00583187	11.5726	0.795201	-0.0141816	0.00569766
Gm06_17667848	1.88626	0.791853	0.00453542	0.00488197	119.424	0.709266	0.0297515	0.00558518	6.2516	0.77254	-0.00890505	0.00482884	444.407	0.728337	0.0843454	0.00608647	136.222	0.795131	0.0423928	0.00634575
Gm06_17678456	8.06887	0.791849	0.0107736	0.0048708	2.08472	0.709311	0.00446198	0.00552323	120.713	0.772467	-0.045601	0.00471199	35.4059	0.728565	0.0286081	0.00551707	29.3956	0.795189	-0.0229203	0.00553442
Gm06_17687830	77.7953	0.79181	0.0317879	0.00495709	64.5124	0.709285	0.0237581	0.00546403	350.969	0.772336	-0.0734084	0.00470436	125.183	0.72851	0.0501405	0.00545616	38.7127	0.795184	-0.0248518	0.0056222
Gm06_17697586	29.6329	0.791837	-0.0199969	0.0050931	41.1881	0.709295	0.0193182	0.00535791	10.7374	0.772536	-0.0131265	0.00479435	43.9635	0.72856	0.0305387	0.0054012	28.1066	0.79519	-0.0216371	0.00561178
Gm06_17705016	0.193865	0.791854	-0.00164868	0.0052396	6.96577	0.709309	0.0080849	0.00515416	47.4909	0.772514	-0.0281987	0.00506624	41.4313	0.728561	0.0304143	0.00562111	45.0768	0.795179	-0.0279841	0.00575898
Gm06_17712301	0.88467	0.791853	0.00352188	0.00492858	21.2231	0.709303	0.0141125	0.00560797	51.9219	0.772511	-0.0294834	0.00478317	29.9298	0.728569	0.0258465	0.00557902	33.8009	0.795186	-0.0242317	0.00578862
Gm06_17722507	1.89931	0.791853	-0.00493106	0.00473331	25.5206	0.709301	0.0148877	0.00544069	14.1584	0.772535	-0.0146416	0.00487332	1.08791	0.728589	-0.00464103	0.00571864	106.448	0.795143	-0.0409102	0.00619163
Gm06_17727137	65.1669	0.791822	-0.0252732	0.00484932	711.752	0.709051	0.0690357	0.00553836	223.446	0.77243	0.0502629	0.00502926	512.694	0.728317	0.084889	0.00595968	128.233	0.79514	0.0388527	0.00635383
Gm06_17756268	68.2703	0.791821	-0.0257818	0.00475242	737.507	0.709042	0.0700397	0.0058796	85.0502	0.7725	0.0309114	0.00505095	599.795	0.728271	0.0915396	0.00580275	70.2457	0.795171	0.0286632	0.00582502
Gm06_17786684	42.0422	0.791834	-0.0200642	0.00496703	559.227	0.709109	0.0605214	0.00681501	110.941	0.772487	0.0349824	0.00551859	391.827	0.728384	0.0732131	0.00593957	129.961	0.79514	0.0386337	0.00579885
Gm06_17876828	28.5233	0.791838	-0.018609	0.00479146	231.853	0.709218	0.0433661	0.00672347	106.327	0.772482	0.039134	0.00588794	141.951	0.728501	-0.0519383	0.00599127	0.522221	0.795208	-0.00279468	0.0059668
Gm06_17890172	55.9243	0.791824	-0.0256284	0.00483248	148.09	0.709253	0.0341395	0.00663235	136.398	0.772466	0.0435227	0.00574382	180.107	0.72848	-0.0572571	0.00565549	0.122734	0.795208	-0.00133059	0.00588101
Gm06_17909874	1184.77	0.791596	0.0484462	0.00558925	7410.69	0.708034	-0.104794	0.0105705	2536.03	0.771994	-0.0723691	0.00984889	124.389	0.728563	0.0164257	0.00524162	0.400663	0.795208	-0.000933022	0.00592395
Gm06_17988853	161.345	0.791771	-0.0422703	0.00466784	106.738	0.709271	0.0282937	0.00645863	298.918	0.77238	0.0624457	0.00608522	146.479	0.728504	-0.0498917	0.00541472	0.417031	0.795208	-0.00237783	0.00567549
Gm06_17997331	161.416	0.791769	-0.0432561	0.00472447	78.0084	0.709281	0.0246403	0.00632813	434.421	0.7723	0.077213	0.00577822	205.201	0.728465	-0.0609094	0.00562118	1.72645	0.795207	0.00496154	0.00538006
Gm06_18018545	95.2083	0.791804	-0.0329697	0.00477004	20.4749	0.709304	0.0125363	0.00616068	430.585	0.772305	0.0762114	0.00542595	357.447	0.728376	-0.0795363	0.00547402	14.2824	0.7952	0.0141491	0.005434
Gm06_18033413	49.4288	0.791827	-0.0243534	0.00455624	128.952	0.70926	0.0321789	0.0053948	178.044	0.772442	0.0503725	0.0049312	163.54	0.728488	-0.0555608	0.00573854	0.0591398	0.795208	0.000935481	0.00544782
Gm06_18055374	93.2913	0.791807	-0.0312101	0.00488598	353.636	0.709179	0.0499454	0.00550602	62.0945	0.77251	0.0275794	0.00505284	7.96718	0.728585	-0.0112319	0.00560856	0.422967	0.795208	-0.00232058	0.00545215
Gm06_18060056	73.7528	0.791816	-0.0283082	0.00502612	205.982	0.709233	0.0388453	0.00540839	78.8583	0.7725	0.0317611	0.00496197	0.600213	0.728589	0.0031619	0.00543995	21.127	0.795196	0.0167572	0.00533939
Gm06_18080782	100.483	0.791802	-0.0331487	0.00508878	247.525	0.709217	0.0426934	0.0055809	93.7045	0.772492	0.0347563	0.00535316	1.89014	0.728588	-0.00564019	0.00581498	15.246	0.795199	-0.0142896	0.00525802
Gm06_18092888	78.9129	0.791813	-0.0293896	0.00576103	182.413	0.709242	0.0366625	0.005774	141.598	0.772466	0.0427427	0.0055187	14.6076	0.728581	-0.015687	0.00579669	27.3571	0.795192	-0.01915	0.00566311
Gm06_18105422	176.379	0.791764	-0.0437202	0.00592493	234.048	0.709222	0.0414191	0.00600945	199.831	0.772435	0.0504847	0.00566381	3.16992	0.728587	0.00725271	0.00561459	59.8292	0.795174	-0.0281596	0.00519932
Gm06_18122803	130.582	0.791788	-0.0374175	0.006468	317.524	0.709191	0.0480095	0.00611051	124.183	0.772476	0.0395596	0.00558475	0.898571	0.728589	0.00383285	0.00586107	38.7163	0.795186	-0.0225175	0.00545359
Gm06_46292681	2524.68	0.791555	0.0385181	0.00619266	8787.85	0.708505	0.0607726	0.00661865	639.991	0.772465	-0.0205425	0.00573784	973.66	0.728466	-0.0277543	0.00669001	1.02788	0.795208	-0.000841038	0.00599784
Gm06_46386548	4097.08	0.791365	0.0494454	0.00628749	2144.18	0.709113	0.030273	0.00625616	5396.04	0.771879	-0.0600407	0.00770188	1568.32	0.72839	-0.0354329	0.00649296	129.272	0.795191	0.00950132	0.00665881
Gm06_46978335	1389.46	0.791672	0.0315104	0.00568193	6500.98	0.708652	0.0577154	0.00651943	1344.39	0.772362	-0.0327998	0.00604075	297.732	0.728548	0.0168533	0.0066812	1284.28	0.795026	0.0327503	0.0107466
Gm06_47199506	1959.51	0.791582	0.0396942	0.00537555	5341.01	0.708747	0.0545022	0.00630602	632.757	0.772451	-0.0242798	0.00559341	240.022	0.728552	-0.0168824	0.00617155	1176.62	0.795028	-0.0337657	0.0077356
Gm06_47364472	1587.87	0.791619	0.0380991	0.00554646	1248.02	0.709171	0.0281894	0.00634099	159.661	0.772518	-0.0130171	0.00537887	202.613	0.728556	-0.0165944	0.00637477	1286.45	0.794998	-0.0376746	0.00771254
Gm06_47383835	1669.81	0.791608	0.0389957	0.00548283	1421.71	0.709152	0.0300343	0.00612624	228.476	0.772507	-0.0155397	0.00484656	247.019	0.728548	-0.0182796	0.00632555	844.29	0.795071	-0.0304619	0.00745821
Gm06_47583763	842.136	0.791741	0.0252257	0.00552828	529.071	0.709257	0.0169644	0.00621425	116.541	0.772527	-0.00999866	0.00469376	27.7669	0.728585	0.00540767	0.00564965	2033.01	0.79491	-0.0426194	0.0068016
Gm06_48581594	27.6222	0.79185	-0.00438795	0.0053476	2575.26	0.709051	0.0362547	0.00761664	281.038	0.772506	0.014792	0.00461287	127.515	0.728572	-0.0108757	0.00545196	166.462	0.795185	-0.0116313	0.00587643
Gm07_37083	6.75565	0.791849	-0.011059	0.00534512	33.6969	0.709295	-0.0204592	0.00647342	1.40168	0.772542	0.00550937	0.00428997	191.149	0.728443	0.0743145	0.00537098	706.71	0.794689	0.125922	0.00615871
Gm07_45542	3.54585	0.791851	-0.00804356	0.00497678	136.618	0.709244	-0.0413621	0.00673457	36.4536	0.772517	0.0282078	0.00435924	97.3447	0.728515	0.0532574	0.00508566	543.606	0.794807	0.110897	0.00568056
Gm07_51132	3.10912	0.791852	-0.00750683	0.00499852	112.378	0.709256	-0.0373814	0.00651916	45.0116	0.772511	0.0312347	0.00450011	78.5251	0.728529	0.0476518	0.00533213	550.647	0.794803	0.111224	0.00526729
Gm07_54186	10.2486	0.791847	-0.0133212	0.00494174	191.329	0.709218	-0.0477825	0.00587956	41.7462	0.772514	0.0293237	0.00458361	13.1464	0.728579	0.0189091	0.00515406	576.561	0.794795	0.110974	0.00600302
Gm07_74340	0.0446381	0.791854	-0.00089289	0.00489469	25.6876	0.709299	-0.0177083	0.00560038	4.85901	0.77254	-0.0101805	0.00477955	38.6362	0.72856	0.0331091	0.00529324	226.355	0.795043	0.0707657	0.00616394
Gm07_77426	44.1258	0.791826	0.027335	0.00551142	93.381	0.709267	-0.0329664	0.00559799	34.7479	0.772519	-0.0264296	0.00506818	147.142	0.728482	0.0623514	0.00555175	361.383	0.794952	0.0868215	0.00611422
Gm07_82738	14.2546	0.791844	-0.0162516	0.00489849	29.963	0.709297	-0.0194516	0.00568289	0.0881256	0.772543	0.00139951	0.00495037	23.0909	0.728571	0.0262417	0.00555368	470.936	0.794858	0.104146	0.00587998
Gm07_86436	21.4362	0.791841	0.0184361	0.00485193	72.8454	0.709278	-0.0282362	0.00549789	228.626	0.772394	-0.0653733	0.00517619	372.44	0.728329	0.0950205	0.00624071	517.717	0.794854	0.100243	0.00614943
Gm07_103051	1.66443	0.791853	0.00554576	0.00479565	82.218	0.709271	-0.0322763	0.00581237	29.4197	0.772522	-0.0255214	0.00442184	24.6179	0.72857	0.0270124	0.00580189	352.215	0.794946	0.0899101	0.00556061
Gm07_109925	6.19349	0.79185	-0.0108229	0.0048562	390.645	0.709113	-0.0709765	0.00577253	10.8437	0.772535	0.0156948	0.00493909	4.29034	0.728586	0.0114503	0.00565741	285.654	0.794993	0.0820112	0.00574239
Gm07_114443	3.74151	0.791851	-0.00844412	0.00461433	181.247	0.709219	-0.0485233	0.00566865	14.5536	0.772532	0.0182562	0.00483076	0.131637	0.728589	-0.00201437	0.00552299	174.401	0.795076	0.0643465	0.00570071
Gm07_119096	28.1737	0.791835	-0.0224836	0.00487787	113.646	0.709256	-0.0373486	0.00572366	64.9594	0.772498	0.0373138	0.00465467	1.62264	0.728588	-0.00680297	0.00532174	190.027	0.795069	0.0650008	0.00539641
Gm07_126478	43.6133	0.791824	-0.0287012	0.00474087	67.4561	0.709278	-0.0296851	0.00526974	10.3602	0.772535	0.0153242	0.00458706	93.8777	0.728516	0.0534293	0.00550695	164.778	0.795084	0.0622305	0.0057901
Gm07_142309	10.8673	0.791846	-0.0143123	0.00484132	152.746	0.709234	-0.0444623	0.00542465	0.161039	0.772543	0.00190512	0.00480708	59.5404	0.728543	0.0422533	0.005696	227.585	0.795037	0.072935	0.00550547
Gm07_151396	18.1424	0.791841	0.0198904	0.00513213	232.698	0.709185	-0.0586941	0.00573301	55.8384	0.7725	-0.0384791	0.0047322	33.1243	0.728561	0.034775	0.00590113	204.116	0.795042	0.0748651	0.00589313
Gm07_159097	1.69343	0.791853	0.00617917	0.00467791	185.998	0.709209	-0.0533894	0.00520999	7.57963	0.772537	-0.0144289	0.00467301	39.9661	0.728554	0.0389326	0.00586063	156.78	0.795078	0.066773	0.00594349
Gm07_162439	2.18938	0.791852	0.00697274	0.00464783	146.228	0.709232	-0.046915	0.00508261	20.1486	0.772527	-0.023352	0.00475151	49.0924	0.728547	0.0428636	0.00602027	208.252	0.795037	0.076386	0.0059538
Gm07_170203	12.3703	0.791846	0.0150801	0.00466545	42.0257	0.709291	-0.0231277	0.00532138	51.0676	0.772507	-0.0334396	0.00477042	120.119	0.728498	0.0589248	0.00569922	638.536	0.794736	0.120399	0.00635732
Gm07_185110	0.506314	0.791853	0.00332824	0.00491978	101.462	0.709257	-0.0388586	0.00518372	67.9473	0.77249	-0.0424979	0.00455566	7.40695	0.728583	0.0164468	0.00580777	305.91	0.794959	0.0917568	0.00620142
Gm07_206543	19.3356	0.79184	-0.0206591	0.00459073	120.437	0.709246	-0.0425277	0.00518438	7.71783	0.772537	0.0143843	0.00469233	0.137437	0.728589	0.00224801	0.00561155	97.8668	0.795128	0.052131	0.00637694
Gm07_214670	66.4782	0.791807	-0.0374823	0.004947	221.436	0.709192	-0.0568303	0.00525633	29.2839	0.772521	0.0272994	0.0046595	30.4868	0.728564	0.0323274	0.00546103	3.86211	0.795205	0.0100954	0.00609969
Gm07_218044	0.586755	0.791853	-0.00368985	0.00466175	36.2068	0.709292	-0.023924	0.00536709	0.0322593	0.772543	-0.000955269	0.00468731	0.573912	0.728589	-0.004736	0.00556197	72.1672	0.795147	0.0459764	0.00618014
Gm07_230638	14.6132	0.791843	-0.0185066	0.00481692	80.0394	0.709267	-0.0358084	0.00558255	2.65469	0.772541	0.0087052	0.00473106	31.8124	0.728561	-0.0353727	0.00567332	25.4039	0.795187	0.0274053	0.00595166
Gm07_233923	0.22358	0.791854	0.00228741	0.00477426	90.5898	0.709261	-0.0380681	0.00545018	15.8265	0.77253	-0.0212376	0.00521442	63.8356	0.728532	0.0500638	0.00566109	9.41705	0.7952	0.0166724	0.00648905
Gm07_240611	7.51493	0.791848	0.0130911	0.00485892	60.2408	0.709278	-0.03068	0.00549417	20.3294	0.772527	-0.0237266	0.0052665	0.0954867	0.728589	0.0019032	0.0056583	54.6346	0.795163	0.0395891	0.00697311
Gm07_245555	0.549145	0.791853	0.00353005	0.0050632	86.4659	0.709264	-0.0367024	0.00547582	1.09306	0.772542	0.00548298	0.00558729	21.7943	0.72857	-0.0285889	0.00575171	4.1674	0.795205	0.0108981	0.00782151
Gm07_250021	0.375971	0.791853	-0.00279672	0.00523043	14.6542	0.709304	-0.0145154	0.00554687	36.0783	0.772516	0.0299977	0.00595062	28.141	0.728566	-0.0306047	0.00602207	3.17708	0.795206	0.00906658	0.00861924
Gm07_264652	701.788	0.791648	0.0501714	0.00557539	16.9539	0.709308	-0.00658556	0.00547347	1164.43	0.772192	-0.068184	0.00690075	846.634	0.728328	-0.0632147	0.00650849	3358.97	0.794146	-0.118234	0.0115755
Gm07_268298	762.996	0.791634	0.0514515	0.00550613	1.80976	0.709312	0.00212061	0.00513791	1864.63	0.771992	-0.0847345	0.00632812	346.074	0.728485	-0.0396199	0.00601146	3236.81	0.794203	-0.114033	0.0101059
Gm07_280535	48.5306	0.79182	-0.0313982	0.00569967	512.524	0.709038	-0.0853763	0.00542426	10.7043	0.772535	0.0160931	0.00644699	55.2735	0.728545	0.0419444	0.00691031	1.88581	0.795207	-0.00688183	0.0101399
Gm07_293728	19.636	0.79184	-0.0199309	0.00584467	241.4	0.709183	-0.0586255	0.00533511	2.76382	0.772541	0.00814715	0.00643925	89.9561	0.728518	0.0531094	0.00604486	23.1847	0.79519	-0.024044	0.00995222
Gm07_301438	1036.8	0.791554	0.0602248	0.00571047	7.57282	0.70931	-0.00435857	0.00577155	1309.46	0.772154	-0.0713234	0.00592587	754.805	0.72836	-0.0587576	0.00635373	2618.04	0.794391	-0.103013	0.00803974
Gm07_305413	769.07	0.791667	0.0437082	0.00570854	135.803	0.709286	-0.0155808	0.00542786	1932.86	0.772062	-0.0726101	0.00591455	1.08853	0.728589	-0.00185289	0.00665015	3627.19	0.794259	-0.101647	0.00916401
Gm07_319389	29.5879	0.791839	-0.0174848	0.00541249	441.937	0.709142	-0.0570103	0.00586315	14.0136	0.772536	-0.0128713	0.00575924	777.489	0.72817	0.106036	0.00721235	55.5368	0.795178	-0.0261528	0.00762216
Gm07_329512	546.789	0.791695	0.0440328	0.00524472	113.221	0.709287	-0.0169673	0.00591067	1031.71	0.772234	-0.0637522	0.00566591	566.665	0.728416	-0.0512998	0.00797352	3377.78	0.794148	-0.117777	0.00791823
Gm07_332462	6.81886	0.791851	-0.00599541	0.00523062	410.405	0.709199	0.0393196	0.00608657	2.16162	0.772542	-0.00360035	0.00544407	745.763	0.728302	0.0741382	0.00637268	21.9615	0.795199	0.011715	0.00695235
Gm07_337942	15.8151	0.791848	-0.00895232	0.00496735	416.762	0.709199	0.0389326	0.00619633	15.3691	0.772537	-0.00939227	0.00532312	1007.84	0.728211	0.0839477	0.00666955	42.9946	0.795192	0.0160399	0.00661741
Gm07_341308	28.338	0.791842	-0.0145572	0.005176	605.363	0.709113	0.0571148	0.0059769	159.988	0.772472	0.036968	0.00510705	137.165	0.728526	0.0380247	0.00641781	57.4905	0.795181	0.0226203	0.00610674
Gm07_345427	29.9342	0.791839	-0.0173142	0.00504706	678.964	0.709055	-0.0696551	0.00676228	17.8781	0.772534	-0.0142964	0.00557886	740.157	0.728198	0.101551	0.00641765	8.59179	0.795203	-0.0101169	0.00595185
Gm07_351478	154.713	0.791745	-0.056611	0.00510291	385.892	0.7091	-0.075959	0.00627551	189.822	0.772401	0.068367	0.00514831	9.1421	0.728582	-0.0171777	0.00652811	8.90746	0.795201	-0.0150924	0.00562527
Gm07_360265	47.2518	0.791834	-0.0187428	0.00499642	781.506	0.709054	0.0651343	0.00640492	177.489	0.772465	0.038796	0.00497426	20.608	0.72858	0.0146651	0.00626496	109.444	0.795158	0.0310983	0.00572934
Gm07_364664	154.177	0.791789	-0.0339597	0.0051587	495.907	0.709148	0.0520485	0.00701831	161.271	0.772472	0.0371008	0.00499933	58.99	0.728562	0.0248927	0.0063056	152.305	0.795138	0.036803	0.00560329
Gm07_367747	119.346	0.791771	-0.0489479	0.00495911	344.647	0.709125	-0.0710723	0.00654773	95.8656	0.772473	0.0476903	0.00506518	8.25851	0.728583	0.0159274	0.00609576	0.0204165	0.795208	-0.000709391	0.00590658
Gm07_374438	60.8731	0.791813	-0.0341546	0.00489607	382.767	0.709109	-0.0732966	0.00696099	53.0756	0.772505	0.0345419	0.00492964	0.0724815	0.728589	0.00144162	0.00610537	0.396324	0.795208	0.00304337	0.00592228
Gm07_377455	27.5143	0.791844	-0.0117783	0.00491146	550.402	0.709163	0.0448793	0.00613864	4.89989	0.772541	0.00528934	0.00454037	976.615	0.728224	0.0824202	0.00644828	129.913	0.795159	0.0278076	0.00620386
Gm07_384396	34.768	0.791842	-0.0132248	0.00501748	631.266	0.709141	0.0479985	0.00638335	3.20447	0.772542	0.00427214	0.00480852	946.34	0.728236	0.0810166	0.00690647	128.04	0.79516	0.0275723	0.00684647
Gm07_391355	406.789	0.791721	0.0425279	0.00534233	561.095	0.709166	0.0435215	0.00613907	144.052	0.772495	-0.0264884	0.00486307	71.4931	0.728565	0.019984	0.0058505	0.0485366	0.795208	-0.000497264	0.00664675
Gm07_397688	116.622	0.791812	0.0249718	0.00501797	409.085	0.709195	-0.0407484	0.00606751	383.491	0.772402	-0.0476222	0.00527593	980.503	0.728224	0.0822976	0.00568142	49.6422	0.795189	-0.0175164	0.00656194
Gm07_404615	23.417	0.791843	0.0149526	0.0050246	107.665	0.709271	-0.0279633	0.00591881	44.0441	0.772521	-0.0217369	0.0049266	174.4	0.7285	0.047436	0.00602016	21.3029	0.795197	-0.0154415	0.00609388
Gm07_407735	1.0674	0.791853	-0.002344	0.00516954	8.96535	0.70931	-0.00581898	0.00564434	163.313	0.772484	0.0306459	0.00517253	323.647	0.728469	0.0471526	0.00569693	401.033	0.795056	-0.0490579	0.00616718
Gm07_411079	18.2087	0.791847	-0.00981661	0.00477833	0.26032	0.709312	0.00100492	0.00594696	153.947	0.772486	0.0302055	0.00522548	417.942	0.728431	0.0545147	0.00622132	273.434	0.795103	-0.0411206	0.00591063
Gm07_415448	8.88752	0.791851	-0.00682464	0.00492188	7.24571	0.70931	0.00527823	0.00608728	106.986	0.772504	0.0250508	0.00566821	308.814	0.728473	0.0465947	0.00630854	212.792	0.795126	-0.0360897	0.00605714
Gm07_423284	247.603	0.791733	0.0494976	0.00503079	140.529	0.709258	-0.0323609	0.00597124	372.403	0.772356	-0.0644419	0.00534814	0.515172	0.728589	0.00263874	0.00602462	0.733162	0.795208	0.00292086	0.00632457
Gm07_438371	370.964	0.79167	0.0617455	0.00446364	335.207	0.70918	-0.0508281	0.00598373	425.798	0.772324	-0.0703202	0.00552114	28.9625	0.728574	0.0202438	0.0060455	44.1228	0.795184	0.0231211	0.00574237
Gm07_469120	956.295	0.791377	0.0998497	0.00507404	179.774	0.709241	-0.0373003	0.0060596	982.598	0.772035	-0.107584	0.00576934	134.951	0.728517	0.0440251	0.00611008	26.1731	0.795194	0.0179415	0.00577297
Gm07_477630	632.186	0.791566	0.0741753	0.00475902	200.293	0.709241	0.035568	0.00622984	21.8714	0.772533	-0.014647	0.00638949	21.2247	0.728579	-0.0158737	0.00575455	9.79338	0.795203	-0.0100101	0.00585312
Gm07_483284	981.933	0.791384	0.097142	0.00499286	1.91925	0.709311	0.00370016	0.00555895	1228.77	0.771935	-0.115113	0.00556995	159.902	0.728507	0.0455667	0.00604748	35.9124	0.795189	0.0201174	0.0057248
Gm07_487045	920.661	0.791398	0.0972686	0.00509338	210.163	0.70923	-0.0399334	0.00556513	771.029	0.772148	-0.0944853	0.00620721	254.169	0.728454	0.059695	0.00648954	88.5162	0.79516	0.0327109	0.0059977
Gm07_495514	672.895	0.791522	0.0829187	0.00586369	184.705	0.70924	-0.0372884	0.00583815	824.075	0.772122	-0.0973292	0.00702231	427.343	0.728363	0.0770211	0.00720017	58.6573	0.795176	0.0265351	0.00584281
Gm07_499876	606.091	0.791585	0.0706958	0.00629731	28.9586	0.709302	0.0131543	0.00544783	31.2713	0.772529	-0.0169848	0.00601586	7.18992	0.728586	0.00889127	0.00670459	6.73478	0.795205	0.00805324	0.00575111
Gm07_550465	322.177	0.791682	-0.0618119	0.0065213	4.54766	0.70931	-0.00612302	0.00557457	216.911	0.772424	0.0537786	0.00706488	304.986	0.728416	-0.06984	0.0073025	39.7247	0.795185	0.023511	0.0059783
Gm07_560099	252.658	0.791717	-0.0557194	0.00654108	2.63437	0.709311	-0.00473814	0.00544999	278.833	0.772386	0.0621608	0.00662697	740.192	0.72816	-0.111242	0.00710713	52.7877	0.795177	0.027627	0.00577049
Gm07_572463	132.912	0.791782	-0.0402194	0.00635645	68.2614	0.709284	-0.0239694	0.00554227	154.433	0.772457	0.0460564	0.00628331	341.448	0.728392	-0.0753173	0.00685833	9.72807	0.795202	0.0118063	0.00552163
Gm07_576356	90.5907	0.791817	0.025075	0.00624799	538.236	0.709141	-0.0520787	0.00538589	1062.2	0.772106	-0.0889877	0.00776545	6.40125	0.728587	-0.00726153	0.00659725	52.0219	0.795185	0.0201687	0.00554667
Gm07_585801	111.369	0.791792	-0.0376981	0.00555031	102.868	0.709269	-0.030091	0.00520222	288.21	0.772378	0.0645312	0.0058319	832.154	0.728095	-0.120951	0.006169	6.31567	0.795204	-0.00975616	0.00575617
Gm07_590147	288.188	0.791696	-0.0600623	0.00530611	107.658	0.709267	-0.0305058	0.00567927	467.055	0.772278	0.081279	0.00565804	1400.87	0.727768	-0.154855	0.00628257	3.49972	0.795206	-0.00718731	0.0054005
Gm07_595871	185.692	0.791749	-0.0498514	0.00516114	731.192	0.708995	-0.0825901	0.00555698	1.24914	0.772542	0.00433832	0.00529222	267.673	0.728428	-0.0696657	0.00625074	5.59958	0.795205	0.00938172	0.00583839
Gm07_599398	401.367	0.791637	-0.0699613	0.00492713	177.042	0.709239	-0.0387063	0.00583622	438.778	0.772298	0.0776004	0.00560722	1201.47	0.727898	-0.140629	0.00627906	0.293605	0.795208	0.00205097	0.00555885
Gm07_603070	277.104	0.791696	-0.0612546	0.00487498	960.697	0.708894	-0.095158	0.00566706	4.11118	0.77254	0.00791815	0.00556349	826.083	0.728088	-0.123061	0.00601854	28.4095	0.79519	0.0212594	0.00586802
Gm07_619231	70.1127	0.791813	-0.03129	0.0047506	714.902	0.708996	-0.0832509	0.00569662	85.2926	0.772492	-0.0366122	0.00542177	69.7307	0.728546	-0.0362945	0.00570933	34.2919	0.795186	0.0237126	0.00607272
Gm07_636937	61.9279	0.791818	-0.0294117	0.00475609	602.377	0.709046	-0.0764609	0.00579648	107.85	0.772479	-0.0411427	0.00589981	123.34	0.728513	-0.0481516	0.0056919	83.731	0.795155	0.037031	0.00589633
Gm07_641788	114.695	0.791787	-0.0402957	0.00470764	775.519	0.708967	-0.0872919	0.00516029	6.85259	0.772539	-0.0104482	0.00532638	209.883	0.728459	-0.0633432	0.00516224	33.6782	0.795187	0.0236584	0.0061156
Gm07_647983	8.39595	0.791848	0.0123092	0.00462133	484.69	0.709065	-0.0790146	0.00550305	15.5714	0.772532	-0.0176822	0.00534811	45.9404	0.728558	-0.0328242	0.00553148	27.9674	0.795188	0.0242186	0.00609842
Gm07_658607	40.7581	0.791826	-0.0277038	0.00462775	23.2543	0.7093	-0.0174724	0.00540621	704.199	0.772055	0.122187	0.00618453	874.919	0.727965	-0.148845	0.00596057	33.0865	0.795184	-0.0270682	0.00613727
Gm07_666957	66.4431	0.791816	-0.0303651	0.00510053	888.917	0.708912	-0.094607	0.00585883	27.9941	0.772526	0.0206069	0.00511623	10.2171	0.728583	0.0132397	0.00613249	45.5429	0.79518	-0.0268842	0.00582351
Gm07_670816	28.3719	0.791835	-0.023388	0.00497413	494.044	0.709052	-0.0823776	0.00595736	0.294005	0.772543	0.00251993	0.00530128	1.72533	0.728588	-0.00664077	0.00602787	2.28263	0.795206	-0.00717372	0.00585963
Gm07_674572	70.3523	0.79181	-0.0339807	0.00520376	88.2214	0.70927	0.0317681	0.0057768	108.534	0.772473	0.0446735	0.00503675	723.791	0.728111	-0.125329	0.00633616	123.499	0.795124	-0.0486868	0.00597339
Gm07_684731	0.0802701	0.791854	-0.00122641	0.00566735	2.53736	0.709311	-0.0057446	0.00578395	107.981	0.772468	0.047788	0.00466812	352.244	0.728338	-0.0944652	0.00555651	343.613	0.794958	-0.0870465	0.0062851
Gm07_712215	264.144	0.79168	-0.069255	0.0056779	116.314	0.709254	-0.0382299	0.00545173	103.691	0.772472	0.0461194	0.00477286	313.167	0.728369	-0.0877689	0.00577348	197.134	0.795067	-0.06494	0.00593357
Gm07_735483	203.893	0.791711	-0.0647746	0.00526008	0.603142	0.709312	-0.00291998	0.00548281	325.117	0.772306	0.0873263	0.0047394	192.345	0.728443	-0.0742194	0.00573702	177.55	0.795072	-0.0658885	0.00586551
Gm07_738627	153.439	0.791746	-0.0562378	0.00513724	3.12218	0.70931	-0.00665453	0.00559225	210.92	0.772389	0.0703282	0.00486895	127.778	0.728492	-0.0603498	0.00513917	82.865	0.795144	-0.0450107	0.00599763
Gm07_746526	420.506	0.791559	-0.0931524	0.00513992	49.3578	0.709286	-0.0264464	0.0054166	473.816	0.772197	0.105616	0.00510109	267.769	0.728385	-0.0878068	0.00548804	66.9422	0.795157	-0.0405407	0.00588206
Gm07_751205	333.722	0.791617	-0.0839731	0.00527932	742.618	0.708907	-0.104894	0.00578041	4.32576	0.77254	0.010176	0.00495529	111.37	0.728504	-0.0566915	0.0054373	3.22732	0.795206	0.00897572	0.00595642
Gm07_757502	365.31	0.791595	-0.0877313	0.00550343	34.212	0.709294	-0.0222191	0.00580428	546.475	0.772139	0.114648	0.00551414	350.454	0.72832	-0.101552	0.00579729	65.8701	0.795157	-0.0406498	0.00603337
Gm07_765401	432.23	0.791549	-0.0949315	0.00553902	787.52	0.708886	-0.107182	0.00549276	24.4451	0.772525	0.024036	0.00531816	23.2609	0.728572	-0.0257541	0.00565727	22.4111	0.795191	-0.0235015	0.00620308
Gm07_768776	222.75	0.791702	-0.065787	0.00527095	817.105	0.708884	-0.105638	0.00586929	7.67553	0.772537	0.0129551	0.00562843	78.656	0.728532	-0.0452522	0.00575874	2.06092	0.795206	-0.00685733	0.00610745
Gm07_779094	632.592	0.791406	-0.115316	0.00550131	1.18422	0.709312	-0.00412527	0.00554921	786.191	0.771963	0.137408	0.00565175	97.7019	0.728514	-0.0536061	0.00563276	115.212	0.795119	-0.0537274	0.00617663
Gm07_786656	476.23	0.791524	-0.0978322	0.00536473	19.2516	0.709302	-0.0163271	0.00562107	724.002	0.772021	0.128741	0.00553721	157.847	0.728471	-0.0663515	0.00587976	171.481	0.795078	-0.0639965	0.00575734
Gm07_794754	167.83	0.791733	-0.0603886	0.00489893	137.729	0.709237	0.04511	0.00573452	178.05	0.772409	0.0665738	0.00515213	389.494	0.728284	-0.108957	0.00625677	50.5677	0.795168	-0.0362165	0.00590771
Gm07_800131	197.184	0.791712	-0.0651622	0.00509339	87.8979	0.709264	-0.0360181	0.00516289	5.49083	0.772539	-0.0116343	0.00524656	105.168	0.728507	-0.0564326	0.00552307	116.804	0.795116	-0.0547634	0.00565316
Gm07_807121	193.67	0.791716	-0.0642802	0.00512018	102.605	0.709257	0.0384782	0.00580206	89.7723	0.772476	0.0469632	0.00500922	361.571	0.728306	-0.10488	0.00576241	328.225	0.794951	-0.0916106	0.00529267
Gm07_810007	35.7473	0.79183	-0.025557	0.00491382	398.652	0.709111	-0.0711957	0.00569291	28.7514	0.772523	-0.0242889	0.00509499	63.426	0.728545	0.0392537	0.00610873	61.456	0.795164	-0.0362767	0.00568772
Gm07_813932	50.462	0.791818	-0.0325694	0.004966	150.545	0.709231	-0.0466491	0.00552487	43.3493	0.772511	-0.0322302	0.0049054	245.685	0.728401	-0.084703	0.00585868	115.718	0.795118	-0.0537543	0.00589114
Gm07_819628	254.564	0.791705	-0.0605409	0.00504694	9.15076	0.709308	-0.00959558	0.0055601	427.68	0.772285	0.0828116	0.00549765	72.8079	0.728545	-0.0369006	0.00532124	284.308	0.795028	-0.069011	0.00543066
Gm07_825005	170.732	0.791728	-0.0620884	0.00496836	144.541	0.709232	-0.0472228	0.00581071	45.4571	0.772508	-0.0343401	0.0052363	27.1156	0.728567	-0.0295083	0.0052648	51.1451	0.795167	-0.0371717	0.00598537
Gm07_838021	1.48896	0.791853	0.00572876	0.00498184	120.887	0.709246	-0.0426049	0.00542684	285.562	0.772326	-0.0849929	0.00579807	27.4671	0.728567	-0.0293135	0.00563408	0.589198	0.795208	0.00394098	0.00648723
Gm07_843001	111.884	0.791772	-0.0497509	0.0049995	188.515	0.709209	0.0531034	0.00565	159.508	0.772421	0.0639362	0.00503723	22.0974	0.728571	-0.0266458	0.00549711	52.74	0.795166	-0.0375075	0.00580466
Gm07_848245	0.764093	0.791853	-0.00418422	0.00493294	141.048	0.709234	0.0464917	0.00587118	6.30423	0.772538	0.0129693	0.00504916	249.677	0.728383	-0.0918225	0.00580384	0.958505	0.795207	-0.00515753	0.00575045
Gm07_862460	11.6276	0.791846	-0.0150865	0.00502459	20.2528	0.709302	-0.0164295	0.00550043	57.2157	0.772502	0.0358466	0.0055007	0.0447999	0.728589	0.00111295	0.00582124	23.2284	0.795191	-0.0233109	0.006146
Gm07_867063	0.263745	0.791854	-0.00244619	0.00533108	151.447	0.709228	0.0480201	0.00572675	1.66251	0.772542	0.00661581	0.00549288	35.2442	0.72856	-0.0341474	0.00548316	26.5939	0.795186	-0.0269896	0.00590572
Gm07_871308	23.1559	0.791836	0.0232527	0.00528475	389.785	0.709093	-0.0784239	0.00582872	287.411	0.772318	-0.0881827	0.00577281	37.6192	0.728558	-0.0358153	0.00539494	15.2157	0.795195	0.0207024	0.00590441
Gm07_878136	92.6122	0.791788	0.0444376	0.00522586	234.925	0.709186	0.0581698	0.00546769	4.25393	0.77254	-0.0102185	0.0059582	37.9088	0.72856	-0.033925	0.00592679	273.622	0.794994	-0.083606	0.00641772
Gm07_880987	75.5423	0.791804	0.0367693	0.0051673	93.0908	0.709266	-0.0338626	0.00538061	811.429	0.771992	-0.128305	0.00617476	91.1809	0.728525	-0.0473586	0.00521876	84.1949	0.795148	0.0422271	0.00662181
Gm07_885921	0.00242276	0.791854	-0.000238292	0.0052671	244.253	0.709175	0.0617654	0.00558248	8.81748	0.772536	0.0155377	0.00647616	8.31506	0.728582	-0.0170313	0.00551121	112.948	0.795115	-0.0567001	0.00662945
Gm07_889067	19.8699	0.791839	-0.0208413	0.00509695	347.861	0.709123	0.0713073	0.00544137	36.6439	0.772515	0.0305234	0.00595909	68.8912	0.728534	-0.0470473	0.00581155	260.668	0.795	-0.0830125	0.00655645
Gm07_894980	401.593	0.791637	0.0701	0.00507757	37.2217	0.709297	-0.0179422	0.00535574	1314.46	0.771816	-0.133149	0.0058084	460.806	0.728332	-0.0845008	0.00568386	371.441	0.794992	0.0724144	0.00669157
Gm07_904850	170.083	0.791739	0.056858	0.00491163	50.3408	0.709286	-0.0255739	0.0054287	443.327	0.772232	-0.0980844	0.00573907	45.9421	0.728556	0.0349461	0.00584643	86.3762	0.795144	0.044208	0.00619115
Gm07_910803	0.00926202	0.791854	-0.000409743	0.00519039	9.54785	0.709307	-0.0109282	0.00550999	94.1152	0.772478	-0.0440721	0.00535899	258.197	0.728406	0.0805112	0.00577725	23.6842	0.795191	0.0225725	0.00590658
Gm07_930008	106.176	0.791782	0.0450392	0.00518727	0.00577919	0.709312	0.000273915	0.00549036	417.096	0.772248	-0.0957044	0.00544558	45.1626	0.728556	0.0350974	0.00579337	194.807	0.795063	0.0667552	0.00599892
Gm07_946757	48.9864	0.791822	-0.0295776	0.00507016	203.121	0.709212	0.0494841	0.00542837	91.3239	0.77248	0.0433667	0.00559291	213.376	0.728436	0.0739913	0.00587426	39.5195	0.79518	-0.0291085	0.00627125
Gm07_950412	42.2145	0.791823	0.0305204	0.00497594	51.1046	0.709284	-0.0275949	0.00561758	299.723	0.772314	-0.0877439	0.00533114	94.8376	0.728512	0.0557244	0.00588755	2.03564	0.795206	-0.00737652	0.00597704
Gm07_960068	38.5423	0.791829	0.0256269	0.00525908	520.286	0.709061	0.077473	0.00536688	19.3993	0.77253	-0.0194919	0.00537163	27.0325	0.72857	-0.0256022	0.00562811	39.7117	0.79518	0.0284584	0.00621874
Gm07_964115	6.46033	0.791849	0.0119121	0.0049694	399.895	0.709095	0.0763954	0.00520886	30.2733	0.77252	0.0279594	0.0050715	53.0673	0.728546	0.0421213	0.00599705	24.2293	0.795189	-0.0254978	0.00600157
Gm07_969563	5.90516	0.79185	-0.0111431	0.00518814	728.374	0.708925	0.101123	0.00515973	80.0777	0.772483	0.0443555	0.00529262	376.529	0.72829	0.108754	0.006587	29.6609	0.795185	-0.0275271	0.0057899
Gm07_974462	44.3898	0.791823	-0.029957	0.00531734	505.071	0.709049	0.0826542	0.00528389	363.62	0.772277	0.0925431	0.00526753	183.394	0.728447	-0.0741531	0.00640401	28.6982	0.795186	-0.0265212	0.00596437
Gm07_986872	11.4691	0.791846	0.01561	0.00513956	1.55018	0.709311	0.00471539	0.00532433	343.359	0.772286	-0.0920996	0.00497897	59.4014	0.728542	0.0432055	0.00580051	3.37723	0.795205	0.00931845	0.00543193
Gm07_1013237	33.7471	0.791829	0.0272275	0.00517549	0.0106825	0.709312	0.000398136	0.00571104	149.456	0.772429	-0.0619419	0.00509603	61.9288	0.728539	0.0451884	0.00568828	0.600614	0.795208	-0.00400431	0.00577023
Gm07_1019722	33.7471	0.791829	0.0272275	0.0052403	0.0106825	0.709312	0.000398136	0.0053712	149.456	0.772429	-0.0619419	0.00492466	61.9288	0.728539	0.0451884	0.00589333	0.600614	0.795208	-0.00400431	0.00577667
Gm07_1022897	2.57893	0.791852	0.00747504	0.00490853	1092.6	0.708723	0.125663	0.00615882	0.0232969	0.772543	0.000769799	0.00486074	141.148	0.728474	0.0680844	0.00496619	2.64701	0.795206	-0.00836496	0.00573901
Gm07_1025739	0.0430968	0.791854	0.00096901	0.00497326	503.06	0.70904	0.0855291	0.00592586	39.3428	0.772513	0.0317308	0.00495318	67.1513	0.728534	0.0471387	0.00548444	25.3186	0.795188	-0.0259489	0.00594862
Gm07_1029910	52.4135	0.791816	0.0339358	0.00476773	9.91928	0.709307	-0.0121414	0.00586757	121.17	0.77245	-0.0557325	0.00490167	143.318	0.728473	0.0685433	0.00539902	0.139292	0.795208	0.00192709	0.00578958
Gm07_1038421	2.5474	0.791852	-0.00605206	0.00477631	75.0241	0.709278	-0.0274642	0.00601663	11.4631	0.772536	-0.0136322	0.00481626	108.875	0.728521	0.0459703	0.00548652	6.35336	0.795204	0.0103657	0.00599254
Gm07_1041984	1.4192	0.791853	-0.00543814	0.00489564	433.218	0.709083	0.077756	0.00543724	57.8158	0.7725	0.0375344	0.00485354	125.331	0.72849	0.0625701	0.00598076	71.6294	0.795152	-0.0425973	0.00618552
Gm07_1046363	74.275	0.791806	0.0361273	0.00490614	185.278	0.709221	0.0472045	0.00554893	188.403	0.772415	-0.0616509	0.00486216	256.367	0.728407	0.0800907	0.00584704	99.9968	0.795137	0.0458379	0.00616182
Gm07_1049188	42.511	0.791825	0.0283242	0.00500294	111.212	0.709256	0.0378183	0.00555549	92.3746	0.772478	-0.0448727	0.00488238	234.952	0.728415	0.0801677	0.00565899	37.0461	0.795181	0.0289921	0.00596689
Gm07_1055723	51.02	0.791819	0.0312402	0.00477214	48.7904	0.709287	0.0252082	0.00541312	99.7094	0.772472	-0.0469705	0.00490199	215.075	0.728428	0.0773964	0.0058538	3.35549	0.795206	0.00879069	0.00570695
Gm07_1059288	5.61174	0.79185	-0.0102791	0.00477945	1024.43	0.708795	0.113927	0.00564959	154.008	0.772434	0.0580299	0.00547664	131.013	0.728491	0.0602441	0.00558916	13.8626	0.795198	-0.0177595	0.00586235
Gm07_1065163	2.36502	0.791852	0.00664844	0.00508864	808.831	0.708905	0.100896	0.00519305	62.9818	0.772499	0.0369679	0.00514234	140.711	0.728485	0.0621633	0.00552891	7.07245	0.795203	-0.0126359	0.00574897
Gm07_1087461	39.2406	0.791829	0.0253209	0.00487384	7.10832	0.709309	0.00882617	0.00544629	168.753	0.772433	-0.0560643	0.00524968	248.921	0.728423	0.0740692	0.00531407	2.91208	0.795206	0.00751918	0.00596725
Gm07_1100255	2.13848	0.791853	-0.00508256	0.00505272	260.237	0.709206	0.0461639	0.00546141	238.386	0.772411	0.0568573	0.00536644	2.55207	0.728588	0.00633228	0.00571357	2.21046	0.795207	-0.005594	0.00610965
Gm07_1107245	13.1092	0.791846	-0.0137572	0.00533666	599.964	0.709048	0.0760462	0.00555241	164.48	0.772442	0.0519866	0.00568192	15.7143	0.728579	0.0174743	0.0058789	60.7237	0.795169	-0.0322502	0.00580244
Gm07_1123613	16.6163	0.791844	-0.0151281	0.00588166	667.692	0.709024	0.078553	0.00599153	318.349	0.772353	0.0704692	0.00605595	6.06916	0.728586	0.01054	0.00579861	154.29	0.795111	-0.0501015	0.0060402
Gm07_1128120	1.12462	0.791853	-0.0039948	0.00644343	582.506	0.709058	0.074336	0.00705134	157.144	0.772448	0.0503623	0.00610696	1.02747	0.728589	-0.00442894	0.00596509	34.1682	0.795186	-0.0239775	0.00581633
Gm07_1168302	1043.09	0.791746	-0.0216354	0.00622922	2331.67	0.709121	0.0278576	0.00620689	10926.9	0.771417	0.0715548	0.00887068	3067.89	0.728282	-0.0391711	0.00792861	4654.46	0.794701	-0.0478945	0.00640011
Gm07_2999056	6655.93	0.791025	-0.0658397	0.0076384	6732.77	0.708668	0.0554097	0.00777026	2248.78	0.772251	0.0408286	0.00607082	654.711	0.7285	-0.0245406	0.00614359	419.707	0.795151	-0.018011	0.00536802
Gm07_3009952	5338.35	0.791138	-0.0634821	0.00752762	8328.74	0.708455	0.0662804	0.00772261	2823.85	0.772148	0.0493659	0.00654445	1435.68	0.728377	-0.0394015	0.00587385	502.551	0.795134	-0.0212627	0.00582537
Gm07_3148636	6337.39	0.790968	-0.0721474	0.00852012	3295.27	0.708958	0.0435069	0.00669465	3432.73	0.772042	0.0567848	0.00732014	1429.18	0.728369	-0.0410189	0.00620922	56.3953	0.795199	-0.00743272	0.00588956
Gm07_3230552	6134.9	0.790993	-0.0711771	0.010273	3053.22	0.708983	0.0420239	0.00641539	4147.55	0.771936	0.062537	0.00976557	1710.22	0.728326	-0.0448944	0.00732411	80.4154	0.795196	-0.00889426	0.0055322
Gm07_3422659	1279.63	0.791717	-0.0247581	0.00767924	396.139	0.709279	0.0118618	0.00631269	221.482	0.772519	0.0107131	0.00764085	2587.34	0.728309	-0.0388401	0.00899134	2556.59	0.794916	-0.0372306	0.00658074
Gm07_3812536	2949.41	0.791325	0.0630148	0.0101213	138.532	0.709293	0.0114224	0.00600457	2246.54	0.772125	-0.0584821	0.00950364	105.018	0.728569	-0.0138873	0.00798714	711.74	0.795069	-0.0336277	0.0061167
Gm07_3822468	1257.06	0.791652	0.0368981	0.00820047	1099.35	0.709176	0.0288639	0.00535423	3509.06	0.77196	-0.0652903	0.00942203	166.723	0.728561	0.0155681	0.00795482	203.519	0.795172	-0.0160733	0.00643606
Gm07_3828047	67.7774	0.791842	0.00943991	0.00673128	1052.96	0.70917	0.0308578	0.00568413	535.7	0.772444	-0.028366	0.00680921	523.841	0.728488	0.0311522	0.00818024	31.5829	0.795202	-0.00703076	0.0064668
Gm07_3845075	1.14807	0.791854	-0.00137791	0.00633908	402.119	0.709252	0.0212931	0.0055801	0.152959	0.772543	-0.000540637	0.00637353	226.062	0.72854	-0.0232974	0.00711465	1533.11	0.794873	-0.055193	0.00639005
Gm07_3866321	2.56399	0.791853	0.0021089	0.006064	288.822	0.709268	0.0183928	0.00573611	3.76978	0.772542	-0.00276013	0.00586528	13.5297	0.728586	0.00589404	0.00694958	239.652	0.795154	-0.0224405	0.00667205
Gm07_3874170	170.555	0.791815	-0.0190805	0.0056566	275.09	0.709265	0.0199903	0.00570866	15.7794	0.772539	-0.00632018	0.0054752	425.5	0.728479	0.0377198	0.00622091	236.595	0.795149	-0.024934	0.006712
Gm07_3907628	291.395	0.791789	-0.0244585	0.00585613	129.479	0.70929	0.0134952	0.0059814	2.69914	0.772542	0.00255382	0.00582983	16.6364	0.728585	0.00724141	0.00639786	1621.98	0.79481	-0.0637777	0.00706032
Gm07_3926012	359.616	0.791773	-0.0276576	0.00591754	30.069	0.709307	0.00658864	0.00569166	5.01441	0.772542	-0.00355947	0.00604735	414.703	0.728482	0.0372803	0.00659912	218.02	0.795153	-0.0239109	0.00706559
Gm07_3957359	551.621	0.791729	-0.0343999	0.00610869	84.3331	0.709298	0.0110791	0.00592781	0.966965	0.772543	-0.00157047	0.00658554	607.457	0.728431	0.0453712	0.00672002	453.787	0.795093	-0.0346553	0.00715946
Gm07_3974002	641.268	0.791714	-0.0356631	0.00662639	25.8599	0.709308	0.00593565	0.00572979	19.0559	0.772539	0.00665655	0.00842148	225.129	0.728534	0.0260266	0.00694263	2597.04	0.794583	-0.0791599	0.00773661
Gm07_3988938	401.757	0.791776	0.0249548	0.00624751	34.8329	0.709307	-0.00610489	0.00540989	3832.61	0.771772	-0.0827468	0.00778229	2476.68	0.728062	0.0746772	0.00713182	0.382072	0.795208	-0.000843689	0.00740934
Gm07_3994870	678.031	0.791723	0.0324857	0.00658039	73.8052	0.709301	-0.00890416	0.00545131	4192.74	0.771697	-0.0867473	0.00764927	2188.63	0.728122	0.0704155	0.00660736	3.12114	0.795207	-0.00241713	0.00717018
Gm07_4010883	306.426	0.791796	0.0214791	0.00656317	101.306	0.709297	-0.0102964	0.0053354	2782.91	0.771992	-0.0693044	0.00651909	703.318	0.728443	0.038925	0.00648904	744.656	0.795053	-0.0366019	0.00762208
Gm07_4830166	7215.92	0.790347	0.115016	0.0101814	1592.94	0.709052	-0.0460105	0.00623192	2726.79	0.771966	-0.073366	0.00697455	1925.8	0.728187	0.0646673	0.00724443	35.779	0.7952	-0.00860893	0.00695782
Gm07_4842648	37.8127	0.791841	0.0132391	0.00609071	6.35965	0.709311	-0.00449876	0.00515316	6.87105	0.772541	0.00601558	0.00605041	265.553	0.728494	0.0411902	0.00663584	39.5039	0.795194	0.0147266	0.0070766
Gm07_4851313	39.4815	0.79184	-0.0139193	0.00602977	7.34789	0.70931	0.00498887	0.00495344	258.5	0.772451	0.0379055	0.00589187	179.653	0.728523	-0.0346985	0.00677981	134.981	0.795158	-0.0279717	0.00616167
Gm07_4857595	16.8917	0.791848	0.0092267	0.00563546	28.1681	0.709305	-0.00984453	0.00494186	0.747485	0.772543	0.00207592	0.0056222	273.9	0.728486	0.0440496	0.00701865	172.242	0.795143	0.0321609	0.00670538
Gm07_4903456	605.93	0.791599	-0.0669398	0.00563902	88.4465	0.709284	-0.0209868	0.00514527	846.743	0.772168	0.0854586	0.00557697	165.52	0.728512	-0.0425535	0.00721287	25.1001	0.795196	-0.0150113	0.00643701
Gm07_4909890	330.973	0.791717	-0.0485146	0.00537857	135.672	0.70927	-0.0255199	0.00532745	532.322	0.772312	0.0663401	0.00526093	99.3393	0.728544	-0.0321797	0.00745386	18.4338	0.7952	-0.0125946	0.00627795
Gm07_4914177	132.388	0.791798	-0.0316043	0.0053139	264.086	0.709228	-0.036351	0.00534518	104.057	0.772496	0.0304086	0.00506153	559.413	0.72832	0.0801323	0.00715637	326.737	0.795054	0.0549162	0.00617157
Gm07_4944406	17.1003	0.791846	-0.0115409	0.00515166	527.744	0.709142	-0.0522314	0.00568392	38.7841	0.772525	0.0188808	0.00497281	502.408	0.728343	0.0774978	0.00790718	135.323	0.795143	0.0359429	0.00617292
Gm07_4954411	4.07941	0.791852	-0.00559359	0.00534106	304.858	0.709215	-0.0394043	0.00555666	1.97918	0.772542	-0.00423022	0.00512416	740.948	0.728229	0.0932237	0.00758763	236.169	0.795096	0.0470926	0.00634629
Gm07_4961647	16.0195	0.791847	0.0116732	0.00520159	394.342	0.70918	-0.0470191	0.00590112	6.62159	0.77254	-0.0081866	0.00502033	421.788	0.728371	0.0750787	0.00736739	656.128	0.794878	0.0829907	0.0063958
Gm07_4970946	76.1541	0.791819	-0.0255768	0.00526356	223.111	0.709236	-0.035704	0.00574989	171.869	0.77246	0.0417621	0.00542178	121.206	0.728527	-0.0399959	0.00774835	0.0388527	0.795208	0.000640006	0.00669446
Gm07_4977160	49.776	0.791831	-0.0206444	0.00525846	1.05486	0.709312	0.00245839	0.00582416	251.867	0.772422	0.0504507	0.00517457	119.267	0.728528	-0.0395655	0.00746574	8.63504	0.795204	0.00952224	0.00694378
Gm07_4982916	6.37957	0.791851	0.00762262	0.00513262	101.461	0.709277	-0.0246083	0.00557718	0.307486	0.772543	-0.00183181	0.00534551	288.749	0.728433	0.0649383	0.00783617	435.141	0.794981	0.070163	0.00665288
Gm07_4988446	202.68	0.79176	-0.0427044	0.00525466	5.75217	0.70931	0.00585101	0.00534376	399.741	0.772346	0.0653493	0.00490677	130.719	0.72852	-0.0428072	0.00705094	11.2272	0.795202	-0.0111617	0.00655341
Gm07_4991464	65.6654	0.791823	-0.0244718	0.00490385	135.358	0.709265	-0.0284276	0.00531901	98.4647	0.772494	0.0328113	0.00515825	107.884	0.728531	0.0397183	0.00711932	376.637	0.795011	0.0653432	0.00684023
Gm07_4996847	231.428	0.791748	-0.0451302	0.0056018	22.4121	0.709304	-0.0114289	0.00526326	383.845	0.772356	0.0632778	0.00518598	101.963	0.728536	-0.0373007	0.00718637	2.03961	0.795207	0.00470137	0.00624901
Gm07_5005970	137.589	0.791791	-0.0346715	0.00507993	165.429	0.709256	-0.0308896	0.00522861	114.8	0.772487	0.0345942	0.00499195	283.209	0.72844	0.0625239	0.00709534	175.302	0.795119	0.0435456	0.0065761
Gm07_5025271	39.2469	0.791836	-0.018679	0.00525893	0.0487091	0.709312	0.000534479	0.0052803	15.5432	0.772535	0.0128282	0.00516958	242.149	0.728461	0.0581176	0.00661643	209.725	0.7951	0.0480004	0.00599395
Gm07_5036770	7.40879	0.79185	-0.00794285	0.00528783	3.40355	0.709311	0.00437446	0.00574397	8.8872	0.772539	0.00947767	0.0052975	352.759	0.728407	0.0683249	0.00692426	223.081	0.795096	0.0483771	0.0060055
Gm07_5070937	19.9476	0.791845	-0.0131752	0.00583122	6.36362	0.70931	0.00606229	0.00587992	5.67576	0.77254	-0.00763354	0.00559881	177.563	0.728498	0.0485041	0.00642456	560.026	0.794924	0.077259	0.00587346
Gm07_5077544	623.114	0.791652	0.0523319	0.0068938	99.9689	0.709287	0.0174478	0.00583078	184.875	0.772481	-0.0302601	0.0062762	290.542	0.728489	0.0413966	0.00645156	154.366	0.795154	0.0282436	0.00564663
Gm07_5083899	516.431	0.791627	-0.0646542	0.0057933	49.342	0.709296	0.0164276	0.00552474	269.907	0.772418	0.0504789	0.00596441	48.7375	0.728565	-0.0241011	0.006667	0.306628	0.795208	-0.00173543	0.00601457
Gm07_5086958	17.3189	0.791846	-0.0118245	0.00583451	2.98761	0.709311	0.00402568	0.00563302	16.2552	0.772535	-0.0123902	0.00590967	413.768	0.728386	0.0704067	0.00692085	1038.53	0.794704	0.100921	0.00612642
Gm07_5097877	359.259	0.791696	-0.0539029	0.0060699	1.75419	0.709312	-0.0031021	0.00543637	415.843	0.772351	0.0625263	0.00648652	7.43557	0.728586	-0.00936288	0.00674001	24.3231	0.795196	0.0154277	0.00623059
Gm07_5109049	186.718	0.791773	-0.0383068	0.00583491	5.45412	0.70931	-0.00540136	0.00513857	134.311	0.772482	0.0349536	0.0066229	38.5619	0.728571	-0.0208755	0.00667165	4.22764	0.795206	-0.00632707	0.00633342
Gm07_5145563	1047.19	0.791499	0.070931	0.00590273	2.5221	0.709312	-0.00286884	0.00529238	1151.95	0.772135	-0.0798225	0.0067548	713.893	0.728323	0.070252	0.00690559	718.288	0.794941	0.064326	0.00665971
Gm07_5152231	1365.2	0.791379	0.0831834	0.00573483	0.0773282	0.709312	-0.000514819	0.00514305	1113.98	0.772136	-0.0808659	0.00663718	290.003	0.728477	0.0463961	0.00706957	744.623	0.794923	0.067452	0.00643017
Gm07_5175977	423.154	0.791695	0.0500087	0.00589988	103.668	0.709283	0.0202519	0.00519606	301.876	0.772423	-0.0457867	0.00619194	7.96836	0.728586	0.008477	0.00680851	19.4623	0.7952	0.0118526	0.00638442
Gm07_5188278	311.268	0.791736	0.0433326	0.00587533	84.0337	0.709288	0.0183977	0.0055768	104.952	0.772501	-0.0273267	0.00579564	25.7231	0.728578	0.0154763	0.00658943	1.06419	0.795208	0.00280464	0.00674522
Gm07_5196061	1661.59	0.79128	0.0912553	0.0063961	14.1318	0.709308	-0.00691881	0.00538543	1107.98	0.77214	-0.0802671	0.00606763	638.98	0.728343	0.0686679	0.00698189	972.754	0.794837	0.0767166	0.00742377
Gm07_5211366	65.3111	0.791829	-0.0197586	0.00586035	304.559	0.709224	0.0355257	0.00583301	19.0227	0.772535	0.0113517	0.00539669	20.7861	0.728581	0.0129973	0.0066623	84.5511	0.795173	-0.0244386	0.006915
Gm07_5226722	15.3766	0.791847	-0.0105686	0.00584983	81.9083	0.709286	0.0201669	0.00560189	13.4258	0.772537	-0.0106021	0.00542107	64.1263	0.72856	0.0257834	0.00693741	14.4345	0.795201	0.0112172	0.00648861
Gm07_5252600	94.6771	0.791815	-0.0256166	0.0057257	149.925	0.709266	0.0266941	0.00550656	45.6834	0.772523	0.0190744	0.00540729	133.634	0.72853	0.0362085	0.00651466	4.22851	0.795206	0.0059224	0.00621268
Gm07_5257601	576.003	0.791646	0.055943	0.005644	23.4913	0.709306	-0.00927878	0.00549924	212.401	0.772462	-0.0367594	0.00525931	80.0355	0.728557	0.0256457	0.0066163	84.8191	0.795174	0.0236845	0.00600271
Gm07_5271925	143.182	0.7918	0.0292382	0.00572798	95.7682	0.709285	-0.0198991	0.00547842	282.051	0.772432	-0.0436715	0.00546731	924.615	0.728216	0.0865562	0.0074396	1032.43	0.794783	0.0852925	0.00648852
Gm07_5280957	929.73	0.791509	0.0731265	0.00585427	2.52883	0.709311	-0.00311679	0.00527136	428.084	0.772375	-0.0539294	0.00553866	82.1517	0.728554	0.0271014	0.00644094	105.222	0.795165	0.0272522	0.00614219
Gm07_5288296	641.423	0.791615	0.0611702	0.00579756	121.739	0.709278	-0.0217514	0.00530018	289.451	0.772428	-0.0447259	0.00549884	17.4338	0.728582	0.0126333	0.00669168	53.4032	0.795186	0.0195776	0.00635572
Gm07_5295494	552.188	0.791649	0.0565489	0.00575396	126.5	0.709277	-0.0221024	0.00521625	351.889	0.772404	-0.049093	0.00548753	42.4918	0.728571	0.0196021	0.00698575	56.9128	0.795184	0.020122	0.00639338
Gm07_5306337	580.456	0.791639	0.0577114	0.00588031	215.126	0.709252	-0.0286966	0.00530968	171.354	0.772476	-0.0340974	0.00553117	2.19741	0.728588	-0.0044348	0.00802929	68.8874	0.79518	0.0220323	0.00654757
Gm07_5309959	1439.09	0.79137	0.082624	0.00592678	193.984	0.709263	-0.0249573	0.00583077	1399.68	0.772049	-0.087727	0.00621381	1076.06	0.728186	0.0866666	0.0108147	1122.57	0.794792	0.0801446	0.00841514
Gm07_5319193	748.32	0.791581	0.0645811	0.00595208	170.694	0.709265	-0.0252847	0.00562543	423.908	0.772379	-0.0527793	0.00586985	43.4799	0.728571	0.0193274	0.0102245	104.559	0.795166	0.0267195	0.00799252
Gm07_5324071	704.76	0.791593	0.0636346	0.0064182	142.961	0.709272	-0.0234124	0.00619787	321.116	0.772417	-0.0467179	0.00582814	1.8792	0.728588	0.0040999	0.0107372	72.3715	0.795178	0.0226034	0.00896719
Gm07_5480878	791.457	0.791686	-0.0386503	0.00685983	529.518	0.709225	0.0266282	0.00641114	355.976	0.772463	0.0279785	0.00608034	2419.55	0.728012	-0.082845	0.0126793	3409.13	0.79441	-0.0882079	0.0112662
Gm07_5486570	78.261	0.791839	-0.0107092	0.00590748	0.0286361	0.709312	0.000174095	0.00631369	135.423	0.772517	0.0150083	0.00533993	4387.62	0.727702	-0.0945809	0.0111661	2482.78	0.794702	-0.0655671	0.00770596
Gm07_5506212	433.6	0.791768	-0.0268133	0.00574562	621.635	0.709216	0.0271345	0.00651987	24.5035	0.772538	0.00685074	0.00563108	151.788	0.728556	-0.0192201	0.00866276	1058.44	0.794976	-0.0459167	0.007437
Gm07_5614060	981.521	0.791646	-0.0429576	0.00623568	871.858	0.70917	0.0340464	0.00586313	598.485	0.772409	0.0362475	0.00597797	2668.5	0.727951	-0.0871495	0.00792021	2883.18	0.794533	-0.0810602	0.00685023
Gm07_5636973	951.603	0.791652	-0.0423541	0.00689416	628.279	0.709209	0.0289343	0.00591414	458.357	0.77244	0.0317707	0.00610025	2874.89	0.727901	-0.0906251	0.00745554	3119.83	0.794477	-0.084441	0.00679214
Gm07_5959928	174.453	0.79182	-0.0166601	0.00744989	372.2	0.709256	0.0204789	0.0053577	196.616	0.772503	0.0189895	0.00592203	1904.06	0.728178	-0.0664597	0.00669413	3042.17	0.794557	-0.0761448	0.00676952
Gm07_5982144	1146.75	0.791679	0.033328	0.00954989	6.29816	0.709311	0.00209468	0.00548303	3311.67	0.772025	-0.059806	0.00818612	68.0575	0.728578	0.00933564	0.00700188	1680.9	0.794931	-0.0435489	0.00698465
Gm07_5989609	52.0984	0.791844	0.00864012	0.00849134	66.5881	0.709303	0.00825201	0.00534631	25.572	0.772538	-0.0064802	0.00567612	354.379	0.728517	-0.0269999	0.00604193	604.45	0.795085	-0.0321453	0.00716768
Gm07_7832406	43115.7	0.7895	-0.0735902	0.0176784	4071.49	0.709135	0.0196096	0.00498034	5285.71	0.772249	0.0268569	0.00830851	3410.92	0.728398	-0.0230271	0.00752204	34.7144	0.795206	0.00222768	0.00681413
Gm07_15058491	0.800445	0.791854	-0.000615021	0.00831485	3344.65	0.709036	0.0336545	0.0058257	61.2233	0.772536	0.00561798	0.00549371	1230.09	0.728455	0.0270769	0.00591113	2540.89	0.794919	0.037001	0.00989558
Gm07_15158482	10.9568	0.791853	0.0023006	0.00782495	6183.58	0.708797	0.0462478	0.00674596	8.70489	0.772542	0.00214129	0.00475827	2371.16	0.728327	0.0379694	0.00584769	3215.19	0.794838	0.0420688	0.0103602
Gm07_16029847	457.343	0.791804	0.0149531	0.00738857	941.804	0.709233	-0.0182215	0.00727007	177.775	0.772523	-0.00967523	0.00574338	1506.24	0.728426	0.0297	0.00722523	8888.18	0.794187	-0.0699272	0.010429
Gm07_17029901	646.803	0.791739	0.0293269	0.00712278	279.747	0.709275	0.015692	0.00637609	16.9752	0.77254	0.00516343	0.00513239	161.822	0.728556	0.0182638	0.00556059	161.424	0.795176	-0.0162261	0.00769214
Gm07_17033285	240.733	0.791811	0.0177267	0.00670891	188.612	0.709287	0.0127776	0.00652875	110.715	0.772522	0.013048	0.00542489	336.103	0.728522	0.0259816	0.00549948	401.917	0.795129	-0.0253363	0.00774332
Gm07_17062559	500.31	0.791767	0.0252273	0.00630158	155.595	0.709292	0.0114662	0.00589512	128.252	0.772519	0.0138531	0.00558167	158.363	0.728558	0.0175683	0.00566799	240.097	0.795162	-0.0193193	0.0068421
Gm07_17420489	2028.23	0.791476	0.0543316	0.00673656	654.865	0.709221	0.0250431	0.00614166	696.206	0.772405	-0.0347199	0.00594085	1171.28	0.728338	0.0518644	0.00576927	229.335	0.79516	0.0203038	0.00724369
Gm07_17421579	1523.54	0.791569	0.0472087	0.00644506	361.097	0.709262	0.0186223	0.00582502	413.877	0.772461	-0.0268653	0.00538491	899.275	0.728395	0.0457112	0.00594148	225.401	0.795161	0.0201971	0.00656087
Gm07_17473635	1506.31	0.791569	0.0475371	0.00616736	295.845	0.709271	0.0170592	0.00574405	484.218	0.772445	-0.0294502	0.00559388	700.408	0.728436	0.0409443	0.0067568	71.87	0.795193	0.0115582	0.00622461
Gm07_17890939	987.846	0.791687	0.0342527	0.00638841	394.936	0.709262	0.0177154	0.00564692	539.625	0.772447	-0.0273033	0.00520418	2.59623	0.728589	-0.00213135	0.00664582	432.038	0.795128	-0.0249164	0.005977
Gm07_17891095	1160.67	0.791656	0.0375659	0.00610077	368.016	0.709265	0.0172892	0.00617239	780.159	0.772403	-0.033252	0.00591555	0.494656	0.728589	-0.000944248	0.00636801	336.95	0.795145	-0.0222871	0.00596827
Gm07_19746203	54.1671	0.791846	0.00693611	0.00605354	310.682	0.709278	0.0136553	0.00671493	14.5004	0.772541	-0.00385907	0.00527546	897.365	0.728444	-0.0342001	0.00675179	375.548	0.795148	-0.0200317	0.00602398
Gm07_23479399	429.528	0.791791	0.0196043	0.00618567	328.189	0.709276	0.0140752	0.00769428	0.990009	0.772543	-0.00101402	0.00532746	1066.86	0.728415	-0.037678	0.00618287	696.682	0.795096	-0.0274299	0.00654134
Gm07_27180364	474.758	0.791784	0.0206267	0.00602935	136.703	0.709297	0.00908974	0.0081891	0.722564	0.772543	-0.000867171	0.00523241	1355.44	0.728367	-0.0425297	0.00557472	662.547	0.795101	-0.0267762	0.00762498
Gm07_30170737	1000.12	0.791708	0.0298321	0.00665034	89.9983	0.709302	0.00735572	0.00869695	142.955	0.772521	-0.0121455	0.00601896	757.67	0.728466	-0.0316135	0.00592355	554.468	0.795119	-0.0243941	0.00886872
Gm07_36725068	1250.58	0.791719	0.0246112	0.00582563	17913.9	0.707806	-0.07946	0.0125335	542.144	0.772483	-0.016971	0.00566557	14.1938	0.728588	-0.00295478	0.00596239	4315.86	0.79471	0.0489351	0.00857446
Gm07_36955973	866.536	0.791765	-0.019622	0.00624405	3785.21	0.709004	-0.0353119	0.00829235	3805.11	0.772137	0.0437002	0.00616613	1885.55	0.728379	-0.034164	0.0062732	5768.11	0.794561	0.05492	0.00993558
Gm07_37010989	335.907	0.791819	-0.0122758	0.00539677	4381.74	0.708954	-0.0381486	0.00756122	2884.38	0.772234	0.03823	0.00523061	1990.99	0.728366	-0.0352635	0.00699302	6540.92	0.794472	0.0587504	0.0102559
Gm07_37180340	2387.58	0.791641	0.0281734	0.0051231	5.83769	0.709312	-0.00123043	0.00642876	1.12711	0.772543	0.000633604	0.00489631	1390.3	0.728465	-0.0234333	0.00706267	14257.9	0.793861	0.0728244	0.0139401
Gm07_40760824	70.7594	0.791846	0.00607942	0.00488935	82.7536	0.709305	0.00547802	0.00605437	15.6545	0.772541	0.00304835	0.00486768	12881.1	0.727038	-0.0965385	0.0108029	7918.66	0.794244	-0.0699096	0.0145981
Gm07_40919533	26.4012	0.79185	0.00412461	0.0046811	5.64894	0.709312	0.00157972	0.00570527	161.38	0.772522	0.0109477	0.00485857	9711.85	0.727264	-0.0949953	0.0100615	2765.24	0.794831	-0.0462139	0.0103893
Gm07_40949633	42.8204	0.791848	0.00612011	0.00472208	95.9801	0.709302	0.00741979	0.00569381	62.0472	0.772533	-0.00808149	0.00498008	703.103	0.72847	-0.0317743	0.00784407	70.722	0.795197	-0.00878467	0.00853407
Gm07_40954694	27.8888	0.79185	0.00497474	0.00509296	56.4144	0.709306	0.0057271	0.00579116	88.2104	0.772529	-0.00971134	0.00496332	607.885	0.728485	-0.0298143	0.00807801	4.96566	0.795207	-0.00234589	0.00769464
Gm07_40958208	29.7466	0.791849	0.00513297	0.00506589	45.0211	0.709307	0.00511178	0.00518868	92.6815	0.772528	-0.00994419	0.00501113	518.464	0.7285	-0.0275012	0.00800215	3.89765	0.795207	-0.00207625	0.00728338
Gm07_41209885	451.945	0.791789	-0.01967	0.00487888	531.205	0.709255	0.0173657	0.00553894	418.09	0.772479	0.0206201	0.00541417	207.153	0.728555	-0.0167219	0.007448	939.183	0.795058	0.0314832	0.00711638
Gm07_41279625	707.466	0.791753	-0.0244534	0.00504953	310.265	0.709279	0.0131994	0.00580926	577.535	0.772456	0.0240601	0.00569478	349.98	0.728532	-0.0215401	0.00793236	620.232	0.79511	0.0254045	0.00688478
Gm07_41661578	432.925	0.791807	-0.0146884	0.00479597	633.339	0.709259	0.0149333	0.0057941	159.765	0.772525	0.00943326	0.00588321	1406.79	0.728427	0.0304311	0.00751686	666.956	0.795129	-0.0196917	0.0061838
Gm07_42404461	1301.95	0.79174	0.0204854	0.00497156	2056.42	0.709171	0.021985	0.00596861	983.253	0.772455	-0.0186011	0.00711974	0.026462	0.728589	0.000103253	0.00792235	1801.71	0.795038	-0.0257504	0.0072377
Gm07_42632283	276.052	0.791824	-0.0114762	0.00516526	4935.86	0.708909	0.0404495	0.00638297	3189.43	0.772186	0.0418984	0.00686124	348.254	0.728548	0.015672	0.00727961	12.8794	0.795206	-0.00271706	0.00578282
Gm07_42648000	380.803	0.791813	-0.0135732	0.00505261	6345.92	0.708791	0.0461384	0.00677468	3136.52	0.77219	0.0418728	0.00754735	1549.56	0.728403	0.033363	0.0066187	89.7885	0.795197	-0.0072292	0.00553426
Gm07_42653477	859.655	0.791761	-0.020391	0.00551139	6751.35	0.708758	0.0475856	0.00685102	4336.33	0.772055	0.0492184	0.00757703	993.011	0.72847	0.0267014	0.00623457	173.727	0.795187	-0.0100542	0.00523815
Gm07_44135661	3353.4	0.791589	0.0296118	0.00729623	8638.6	0.708772	0.0410088	0.00651453	4093.32	0.772219	-0.0335935	0.00990781	4232.06	0.728261	0.0356055	0.00593547	1322.79	0.795098	0.0195671	0.00572312
Gm08_1438667	100.157	0.791817	0.0236664	0.00506865	544.447	0.709165	-0.0445276	0.00679359	0.00166459	0.772543	-0.000106238	0.00596732	146.462	0.728526	0.0367916	0.00583677	75.1811	0.795177	0.0229822	0.00518246
Gm08_1444196	20.2975	0.791846	0.0105858	0.00541593	778.289	0.709103	-0.0528987	0.00658883	52.2585	0.772523	0.0186947	0.00574085	75.499	0.728557	0.0262181	0.00565192	1.1826	0.795208	0.00286294	0.00534278
Gm08_1451500	2.5851	0.791853	-0.00382404	0.00495744	300.495	0.709231	-0.0331742	0.00596582	55.0447	0.772521	0.0194515	0.00564406	116.08	0.728539	0.033059	0.00582119	82.7045	0.795174	0.0242679	0.00558373
Gm08_1456096	1.19111	0.791853	0.00263874	0.00500446	421.965	0.709196	-0.0398807	0.00574165	30.6271	0.772531	0.0147902	0.00538463	14.7592	0.728583	0.0120874	0.00610527	92.9893	0.795169	0.0262232	0.00564508
Gm08_1493618	11.5961	0.791849	0.00810375	0.00489131	402.4	0.709203	-0.0384079	0.00548207	42.6975	0.772526	-0.01716	0.00557936	9.85608	0.728585	0.00967045	0.00621319	293.961	0.795086	0.0458181	0.00567736
Gm08_1504051	68.8836	0.791829	-0.0196008	0.00460141	124.543	0.709279	-0.0212356	0.00549342	45.7933	0.772525	0.0176043	0.00536137	483.256	0.728381	0.0668237	0.00658235	0.207764	0.795208	0.00120704	0.00583433
Gm08_1511086	5.58952	0.791852	-0.0059369	0.00454756	91.8352	0.709286	-0.0192597	0.00547582	75.1903	0.772511	0.0241857	0.00547558	115.149	0.728535	0.0355844	0.00640941	31.3024	0.795194	0.0158721	0.00581178
Gm08_1522819	8.8637	0.79185	-0.00717064	0.00484961	193.835	0.709259	-0.0269248	0.00515645	29.2334	0.772531	0.0143907	0.00528063	74.0235	0.728556	0.0268664	0.00630549	2.36407	0.795207	-0.00416438	0.00576555
Gm08_1561323	1.38748	0.791853	0.00293769	0.00483409	0.970503	0.709312	-0.00196811	0.00539395	38.3918	0.772527	0.017151	0.00524241	115.102	0.728536	0.0352394	0.00619632	29.1228	0.795195	-0.0151943	0.00568708
Gm08_1566515	2.46637	0.791853	0.0039868	0.0050628	13.1752	0.709308	0.00736887	0.00510503	62.3237	0.772516	0.0222915	0.00507296	66.8834	0.728557	0.0275296	0.00618138	0.0565196	0.795208	-0.000682696	0.00575446
Gm08_1582661	0.313377	0.791854	-0.00143179	0.00526167	0.709107	0.709312	-0.00172099	0.00501806	78.7673	0.772509	0.0252744	0.00519701	22.5631	0.728578	0.0161621	0.00564073	0.439155	0.795208	-0.00191908	0.00609362
Gm08_1590551	32.4075	0.791841	0.0144426	0.0051105	6.24263e-05	0.709312	1.60235e-05	0.00477976	10.6977	0.772538	0.00922934	0.00512154	8.64445	0.728585	0.00988858	0.005955	12.1975	0.795203	-0.0100222	0.00593298
Gm08_1599066	0.31786	0.791854	0.00144736	0.00522227	6.45129	0.70931	0.00520588	0.00533881	35.8921	0.772527	0.017129	0.00482613	89.3386	0.728546	0.0322978	0.00628575	13.5597	0.795202	-0.0107056	0.00646201
Gm08_1609420	17.2518	0.791847	0.0106625	0.00511162	20.143	0.709306	0.00919796	0.00528132	27.4863	0.772531	0.0149911	0.00505592	80.2887	0.72855	0.0306311	0.00617036	9.44956	0.795204	-0.00893774	0.00601889
Gm08_1631067	2.57801	0.791853	-0.00392308	0.00559366	36.9016	0.709302	0.0119467	0.00560065	130.695	0.77249	0.0308204	0.00529649	16.8819	0.728582	0.0129665	0.00601876	1.19882	0.795207	-0.00300444	0.00715772
Gm08_1654923	56.5402	0.791842	-0.0102935	0.00560784	298.647	0.709264	0.0197014	0.00601387	365.641	0.772463	0.0276741	0.00493242	0.00208866	0.728589	-7.14632e-05	0.0060594	1531.6	0.794857	-0.0578565	0.00877923
Gm08_1663406	1.97711	0.791853	0.00335916	0.00501441	80.0845	0.70929	0.0172422	0.0056362	0.896425	0.772543	0.00249094	0.00519975	46.0173	0.728569	0.020812	0.00594666	0.560363	0.795208	-0.0020048	0.00703439
Gm08_1677133	3.14277	0.791853	-0.00431957	0.00542203	61.7022	0.709295	0.0153943	0.00577368	71.2832	0.772514	0.022696	0.00524613	1.23981	0.728589	-0.00350307	0.00641795	25.2917	0.795197	-0.0137597	0.00782453
Gm08_1690262	12.3581	0.791849	-0.00816635	0.00495359	0.408649	0.709312	-0.00120065	0.00593794	118.48	0.772497	0.027716	0.00535678	224.118	0.728496	-0.0440298	0.00635991	9.24213	0.795204	0.00788391	0.00755231
Gm08_1764654	462.095	0.791728	-0.0377661	0.00498907	783.109	0.70915	-0.0408087	0.00624143	1.22273	0.772543	0.00207822	0.00561462	269.901	0.72851	-0.0341628	0.00786789	887.36	0.794944	0.0571268	0.00818726
Gm08_1770144	235.552	0.79179	-0.0268187	0.00527989	835.26	0.70914	-0.0419134	0.00627173	100.549	0.772515	-0.018736	0.00561654	169.405	0.72854	-0.0268936	0.00670088	1269.35	0.794833	0.0679219	0.00861583
Gm08_1776653	376.458	0.791755	-0.0329912	0.00537447	555.263	0.709201	-0.0333231	0.00629152	58.4144	0.772527	-0.0138636	0.0060016	157.863	0.728544	-0.0250914	0.00727363	1347.49	0.794821	0.0679508	0.00948731
Gm08_1793950	28.3157	0.791848	-0.00726413	0.00524609	571.877	0.709219	0.027366	0.00617915	1749.44	0.772163	0.0602298	0.00677159	1138.13	0.728338	0.0525199	0.00901842	185.178	0.795166	-0.0200348	0.00888928
Gm08_1863077	263.837	0.791796	-0.0230052	0.00556986	494.837	0.70923	0.0261125	0.0063928	136.34	0.772512	0.0177134	0.00586932	81.8665	0.72857	0.0153223	0.0066126	362.69	0.795121	-0.0294806	0.00754596
Gm08_1868966	283.188	0.791792	-0.0235944	0.00572038	279.971	0.709266	0.0194569	0.00638247	231.224	0.772491	0.0228209	0.00613845	0.446755	0.728589	0.00111849	0.00631159	323.745	0.795131	-0.0275574	0.00667553
Gm08_1896648	512.021	0.791744	-0.0313716	0.00645878	207.592	0.709278	0.0165935	0.0059209	480.139	0.772436	0.0324777	0.0058764	76.8351	0.728571	0.0144559	0.00629251	834.178	0.795012	-0.0436884	0.00644896
Gm08_1948104	656.835	0.791713	-0.0355108	0.00709809	411.731	0.709245	0.0233365	0.00574712	444.852	0.772444	0.0312464	0.00695085	177.388	0.728548	0.0219549	0.00603561	773.336	0.795027	-0.0420449	0.00625837
Gm08_2285799	2955.01	0.791559	0.0350961	0.00705149	24.6219	0.70931	-0.00275496	0.00607064	1461.4	0.772394	-0.025767	0.00589353	447.788	0.728543	0.0152927	0.00582032	121.586	0.795195	-0.00760311	0.00633505
Gm08_2290843	2951.48	0.791532	0.0383194	0.00604513	3689.41	0.708999	0.0363208	0.0058602	848.635	0.772448	-0.0216499	0.00537221	141.484	0.728573	-0.00964074	0.00637077	881.991	0.795104	-0.0225554	0.00645158
Gm08_2473625	11816.6	0.79074	0.0664036	0.00698015	384.356	0.709284	0.0102904	0.00535311	3617.36	0.772196	-0.0382959	0.00582453	369.865	0.728554	0.0130702	0.00662977	1232.35	0.795083	0.0228741	0.00818648
Gm08_5123392	381.517	0.791829	-0.0081529	0.00566492	869.788	0.709268	0.0106022	0.00579249	10.2184	0.772542	0.00137604	0.00455767	33.8773	0.728587	0.00263729	0.00614386	6593.72	0.794758	-0.0357698	0.00841431
Gm08_10612052	7.34681	0.791852	-0.0047787	0.00598705	336.154	0.709241	0.0273232	0.00562484	1.35465	0.772543	0.00216799	0.00486124	19.2713	0.728584	0.00893379	0.00598595	80.9209	0.795184	-0.0171195	0.00653329
Gm08_10617646	19.6144	0.791848	-0.00813377	0.00558824	283.91	0.70925	0.0259901	0.00539047	0.282182	0.772543	0.00103299	0.00459504	62.8959	0.72857	0.0169192	0.00550601	76.337	0.795184	-0.0173551	0.00658828
Gm08_10622979	0.173406	0.791854	-0.000728147	0.00561797	104.366	0.70929	0.0150286	0.00542975	0.201348	0.772543	-0.00082822	0.00488161	251.385	0.728517	0.0319165	0.00566936	260.441	0.795132	-0.0304335	0.00681246
Gm08_10642816	656.222	0.791682	-0.0433504	0.00624196	386.557	0.709234	0.0281194	0.00553525	94.1095	0.772518	0.0173036	0.00504381	144.259	0.72855	-0.0232816	0.00606587	104.35	0.795179	0.0186209	0.00656097
Gm08_10648763	227.371	0.791796	-0.0248553	0.00614177	1219.96	0.709071	0.0486687	0.0055278	258.483	0.772475	0.0280023	0.00563808	712.534	0.728397	-0.0507738	0.00650061	1012.07	0.794929	0.0565973	0.0078548
Gm08_10661414	270.379	0.791772	-0.0322332	0.00611293	2.99816	0.709311	-0.00286278	0.00557771	41.1604	0.77253	0.0133598	0.00565228	332.531	0.728481	-0.0418772	0.00538834	383.918	0.795081	-0.041661	0.00716366
Gm08_10694073	336.712	0.791768	0.0304188	0.00594162	1029.66	0.709108	0.0448453	0.00578069	26.0181	0.772536	-0.00894162	0.00616115	97.5845	0.728563	-0.0189396	0.00599508	70.5421	0.795188	0.0150416	0.00687477
Gm08_10715686	1549.6	0.791612	0.0397442	0.00621241	114.932	0.709298	-0.00917207	0.00552308	2600.4	0.772127	-0.0541297	0.00698658	178.106	0.72856	0.0153946	0.00573335	1044.4	0.795032	-0.0350738	0.00721881
Gm08_10733167	3406.5	0.791322	0.0590704	0.00767843	243.25	0.709283	-0.0133881	0.00559163	5900.28	0.771599	-0.0816674	0.00866725	592.395	0.728492	0.0281118	0.00587692	992.16	0.795041	-0.0342657	0.00645007
Gm08_10755506	1090.45	0.791687	0.0326033	0.00633586	258.483	0.709281	-0.0134901	0.00549743	1187.21	0.772358	-0.0356025	0.00666262	688.735	0.728481	0.0292025	0.00673968	14.8248	0.795206	-0.00406914	0.00629049
Gm08_10760788	590.824	0.791628	-0.0601965	0.0073693	285.332	0.709227	-0.0355289	0.00551574	922.797	0.77218	0.0793685	0.00780473	35.9567	0.728575	-0.0170294	0.00624014	23.3162	0.795198	-0.0128982	0.00611545
Gm08_10787456	0.180804	0.791854	0.000666663	0.00614285	793.081	0.709161	0.0377629	0.00602237	7.49631	0.772541	-0.00447482	0.00622048	2926.13	0.72787	0.093877	0.00731123	0.558567	0.795208	0.00124964	0.00661949
Gm08_10801642	334.873	0.791714	-0.0495442	0.00557189	178.603	0.709254	-0.030588	0.00524434	570.847	0.772296	0.0685295	0.00573621	75.6267	0.728556	0.0273113	0.00599335	38.3948	0.795191	-0.0181602	0.00589089
Gm08_10821603	810.372	0.791557	-0.067405	0.00546029	506.34	0.709167	-0.0456129	0.00556877	879.395	0.772214	0.0737154	0.0052951	29.2708	0.728578	-0.0144383	0.00596223	159.463	0.795145	-0.0321041	0.00585832
Gm08_10832003	223.879	0.791767	-0.0377058	0.00516371	89.1046	0.709285	0.0199919	0.00545278	56.9417	0.77252	0.0202968	0.00522536	0.147446	0.728589	-0.00114626	0.00611392	19.8964	0.7952	-0.0122475	0.00560704
Gm08_10849957	319.012	0.791731	-0.04455	0.00495232	2.10757	0.709312	-0.00303503	0.00536402	177.928	0.772472	0.0354044	0.00497318	572.204	0.728352	-0.0700106	0.00608535	27.5678	0.795196	-0.0142311	0.00561959
Gm08_10859682	92.6547	0.791813	-0.0273468	0.00524488	63.9391	0.70929	0.0191761	0.0051943	385.825	0.772368	0.0589901	0.00500636	144.186	0.728522	-0.0392625	0.00588717	1.15289	0.795207	-0.00329542	0.00603294
Gm08_10905109	164.216	0.791787	-0.0336607	0.00490606	176.218	0.709257	0.0292121	0.00519173	29.3425	0.772531	0.0151663	0.0044278	0.173552	0.728589	-0.00128986	0.00578194	0.387509	0.795208	0.00177944	0.00598265
Gm08_10911988	29.6182	0.791842	-0.0138609	0.00494663	0.0942636	0.709312	-0.000656525	0.00517705	7.37029	0.77254	0.00734784	0.00493836	18.1278	0.728582	-0.0126709	0.00568793	52.6414	0.795185	0.0200538	0.00622665
Gm08_10945445	395.539	0.791667	-0.0608094	0.00515785	41.9193	0.709297	0.0164373	0.00526386	56.8756	0.772515	0.0246879	0.00473325	17.3543	0.72858	-0.0152054	0.00575189	6.65755	0.795205	-0.00862026	0.00634013
Gm08_10981040	229.677	0.791744	-0.0468772	0.005237	168.087	0.709251	-0.033292	0.00517972	21.3998	0.772532	0.0153304	0.00483354	0.652139	0.728589	-0.00298865	0.00545817	18.0081	0.795199	0.0143509	0.00656169
Gm08_10985785	353.742	0.791681	-0.0595356	0.00540155	145.634	0.709258	-0.0316367	0.00509231	8.4325	0.772539	0.00986947	0.00499177	1.4067	0.728588	0.00452083	0.00562243	76.2082	0.795167	0.0302696	0.00643378
Gm08_11000222	214.551	0.791737	-0.0517236	0.00584073	416.402	0.709137	-0.0606775	0.00523384	448.12	0.77229	0.0793149	0.00506151	164.664	0.728493	-0.0526911	0.00571589	40.2328	0.795184	-0.024281	0.00722067
Gm08_11020996	1013.25	0.791404	-0.0914955	0.00588163	66.4591	0.709289	-0.0198105	0.0051957	178.794	0.772461	0.0404634	0.00506493	173.576	0.728509	-0.0430098	0.00615027	994.864	0.794731	0.0975182	0.00689326
Gm08_11026070	954.861	0.791393	-0.0965759	0.00590061	11.5169	0.709308	0.00888298	0.00518423	109.817	0.772488	0.0346894	0.00513105	546.031	0.72831	-0.0843603	0.00664393	1016.69	0.794675	0.107767	0.00757642
Gm08_11037687	185.664	0.791771	-0.0393977	0.00600842	176.444	0.709252	-0.0319739	0.00521421	0.0156409	0.772543	-0.0003851	0.00518092	15.4446	0.728582	0.0133587	0.00663376	90.7223	0.795164	0.0299446	0.00681302
Gm08_11059925	1167.3	0.791318	-0.101613	0.00698983	35.6489	0.7093	0.0149176	0.00534406	331.277	0.772386	0.0570902	0.00536611	824.523	0.728193	-0.0974304	0.00747777	947.739	0.794737	0.0986516	0.00747293
Gm08_11071581	22.301	0.791842	0.0155668	0.00635361	47.2836	0.709294	-0.0189286	0.00534837	10.7721	0.772537	0.0115027	0.00521628	130.858	0.728518	0.0441313	0.00721208	657.891	0.794843	-0.0917564	0.00744258
Gm08_11076677	117.572	0.791798	0.0330135	0.00619963	103.819	0.709274	0.0260814	0.00548162	8.34069	0.772539	0.0092761	0.00510671	162.045	0.728509	0.044328	0.00667169	439.108	0.794985	-0.0687639	0.00712343
Gm08_11087946	68.571	0.79182	-0.026515	0.00566206	113.029	0.709269	-0.0287389	0.00515722	342.456	0.772368	0.0627615	0.0051598	33.5147	0.728572	0.0214642	0.00586427	861.753	0.794745	-0.101668	0.0064373
Gm08_11115799	8.88957	0.791849	0.00986865	0.00515915	178.247	0.709242	-0.0369646	0.00542855	0.726019	0.772543	0.00299524	0.0050669	50.3976	0.728562	0.0274119	0.00586352	426.004	0.794971	-0.0740776	0.00591529
Gm08_11123002	157.37	0.791761	-0.0476704	0.00517205	122.313	0.709257	-0.0351092	0.00536115	274.619	0.772375	0.0670482	0.00529839	291.695	0.728405	-0.0762359	0.00600293	0.0646999	0.795208	-0.00105103	0.00681611
Gm08_11129635	10.8915	0.791848	-0.0109752	0.00533258	66.3805	0.709286	-0.0226487	0.0053775	65.1813	0.772508	0.0285187	0.00541973	43.5535	0.728565	0.0256147	0.00574219	816.779	0.794751	-0.103047	0.00635072
Gm08_11139109	128.813	0.791777	-0.043927	0.00503383	152.68	0.709242	-0.0399922	0.00568422	80.0742	0.772493	0.0368381	0.00492651	245.419	0.728431	-0.0709935	0.0054469	217.401	0.795066	-0.0619766	0.00604302
Gm08_11151724	276.783	0.791687	-0.0648725	0.00530216	267.583	0.709188	-0.0533323	0.00548152	134.969	0.772459	0.0482033	0.00491162	395.771	0.728333	-0.0909072	0.00598414	304.288	0.795008	-0.0738963	0.00571422
Gm08_11156507	845.319	0.791388	-0.10372	0.00553185	48.0295	0.709292	-0.0209189	0.00541743	474.01	0.772274	0.081928	0.00520386	22.5279	0.728576	-0.0193466	0.00544003	242.361	0.795063	-0.0598809	0.00620635
Gm08_11174054	728.302	0.791416	-0.10495	0.00563189	444.104	0.709106	-0.0689544	0.00560836	96.5771	0.772483	0.0404614	0.00470471	0.306534	0.728589	-0.0024831	0.0054475	21.5883	0.795194	-0.0195457	0.00630901
Gm08_11189442	1034.61	0.791307	-0.110178	0.00595638	411.253	0.70914	-0.0598323	0.00516449	535.168	0.772254	0.0829667	0.00466976	124.697	0.728521	0.0427643	0.00555072	107.334	0.795147	-0.0380111	0.00691389
Gm08_11196711	779.309	0.791402	-0.104804	0.00546101	764.235	0.708968	-0.0878249	0.00536847	411.357	0.772298	0.0801634	0.00482668	133.488	0.728508	0.0492671	0.00558223	245.417	0.795054	-0.0632997	0.00669856
Gm08_11206215	30.9864	0.791841	-0.0150827	0.00612986	356.052	0.709196	-0.0435631	0.00526917	764.06	0.772218	0.0779864	0.00508717	43.1316	0.728571	-0.0196643	0.00560469	194.214	0.795121	0.0402403	0.00713655
Gm08_11228188	861.537	0.791331	-0.115321	0.00586299	757.134	0.708955	-0.0914833	0.00513058	228.016	0.772401	0.0625348	0.00509968	50.7117	0.728557	0.0318541	0.00573207	197.538	0.795078	-0.0594931	0.00785171
Gm08_11233711	27.3953	0.791844	-0.01242	0.00535206	0.560159	0.709312	0.00150671	0.00547557	113.93	0.7725	0.026497	0.00511125	221.108	0.728506	-0.0395001	0.00596776	242.206	0.795113	0.0395084	0.00750423
Gm08_11239670	2.0849	0.791853	-0.00397794	0.00579767	199.141	0.709245	-0.0333763	0.00520323	426.508	0.772359	0.0592238	0.0053372	185.99	0.728509	-0.0414512	0.00542847	257.66	0.795091	0.0471028	0.00678734
Gm08_11252482	381.044	0.791621	-0.0771973	0.00566166	292.778	0.709172	-0.057545	0.00546234	28.1026	0.772525	0.02203	0.00555693	37.0224	0.728566	0.0271523	0.00547377	51.241	0.795174	-0.0304126	0.00722506
Gm08_11261015	262.642	0.791724	-0.0518724	0.00607262	8.40121	0.709309	-0.00781466	0.00561798	145.51	0.772469	-0.0407866	0.00558256	3.96313	0.728587	0.00731529	0.00555209	132.439	0.795137	0.0397611	0.00630908
Gm08_11276155	74.3131	0.791825	0.0212607	0.00643106	8.15389	0.70931	0.00596591	0.00528663	39.5335	0.772527	-0.0162506	0.00518425	293.087	0.728474	-0.0475135	0.00554787	798.597	0.794881	0.0746551	0.00733667
Gm08_11292805	518.063	0.791529	-0.0923847	0.00623448	636.839	0.709	-0.0873077	0.00562882	122.378	0.772464	0.0471357	0.00559037	6.27097	0.728585	-0.0114361	0.00542043	48.2188	0.795175	-0.0302542	0.0068609
Gm08_11324216	219.314	0.791713	-0.0616641	0.00658402	165.861	0.709229	-0.0453965	0.00560325	0.477513	0.772543	0.0030273	0.00523164	31.6645	0.728568	-0.0265611	0.0052708	62.9361	0.795164	0.0355255	0.00668103
Gm08_11336083	475.291	0.791622	-0.0687599	0.00749263	2.41771	0.709311	0.00412095	0.00567342	60.8268	0.772512	-0.0260156	0.00558753	20.2073	0.728579	-0.0163549	0.00531181	147.378	0.79513	0.0413714	0.00645904
Gm08_11355229	2507.74	0.790906	0.122649	0.00763477	638.299	0.709126	0.0519827	0.00592222	1855.88	0.77182	-0.111519	0.00619115	9.15729	0.728586	-0.00855488	0.00542192	5.21135	0.795206	-0.00604351	0.00585701
Gm08_11359720	2544.67	0.790873	0.12603	0.00709602	152.131	0.709267	0.0258547	0.00531022	2183.72	0.771674	-0.123542	0.00608626	4.94343	0.728587	-0.00643625	0.00559472	36.0562	0.795193	-0.0162355	0.00602826
Gm08_11369441	628.078	0.791628	0.0582554	0.00701001	193.723	0.709258	0.0274686	0.00562799	389.303	0.772399	-0.0482517	0.00561157	124.092	0.728543	-0.0294756	0.00569028	10.2185	0.795204	-0.00799205	0.00607094
Gm08_11386429	2323.78	0.790985	0.116744	0.00725889	193.825	0.709256	0.0283623	0.00575999	2294.07	0.77166	-0.122437	0.00592932	2.27234	0.728588	-0.00420011	0.00568421	9.9324	0.795204	0.00824148	0.0057119
Gm08_11396698	274.749	0.791672	-0.0710645	0.00675441	201.242	0.709209	-0.0514444	0.00596609	84.0345	0.772486	0.0414054	0.00582051	82.3195	0.728532	-0.0442699	0.00559504	17.0201	0.795196	-0.0190471	0.00589434
Gm08_11416374	183.929	0.79173	-0.0591646	0.0063089	369.746	0.709119	0.0709145	0.00565078	9.09846	0.772537	0.0138758	0.0054573	48.742	0.728555	0.0347517	0.00585484	28.1224	0.795187	-0.0249317	0.00573789
Gm08_11421795	31.5205	0.791831	-0.0261034	0.00586004	24.4458	0.709299	0.0194306	0.0058277	2.29725	0.772541	0.00746523	0.00525092	16.9212	0.728576	-0.0221263	0.00576358	0.346599	0.795208	-0.00296222	0.00558448
Gm08_11428039	213.066	0.791693	-0.0713918	0.00548748	1.46053	0.709311	-0.00496573	0.00560289	6.39807	0.772538	-0.0131663	0.00560225	6.91349	0.728584	-0.0150746	0.00555463	0.324307	0.795208	-0.00302692	0.00623205
Gm08_11437633	73.2298	0.7918	-0.0409714	0.00510174	4.24484	0.70931	0.00828133	0.00546215	97.7718	0.772468	-0.0503317	0.00544743	88.5917	0.728519	0.0526883	0.00561361	51.6	0.795166	0.0373417	0.00616788
Gm08_11442368	216.97	0.79171	-0.0632529	0.00518066	109.034	0.709256	0.0379268	0.00537578	7.20322	0.772538	0.0121462	0.00517514	28.327	0.72857	-0.0260336	0.00565659	0.0867651	0.795208	0.00136249	0.00628014
Gm08_11451417	351.439	0.791671	-0.0631483	0.00499937	95.8534	0.709274	0.0276183	0.00539706	159.362	0.772457	-0.0451923	0.00512616	5.94814	0.728586	0.0096221	0.00574101	594.429	0.794871	0.0891048	0.00693488
Gm08_11460158	224.448	0.791697	-0.0678945	0.00485016	1.74141	0.709311	-0.00504204	0.00519881	31.9811	0.77252	0.0271197	0.00520534	199.955	0.728441	0.0738498	0.00564364	73.0772	0.795152	0.041882	0.00657031
Gm08_11467004	212.373	0.791717	-0.0608535	0.00518326	43.5658	0.70929	-0.023384	0.00495601	1.35577	0.772542	0.00510188	0.0047722	30.427	0.728569	-0.0259024	0.00560784	85.3604	0.795149	0.04139	0.00660392
Gm08_11489005	297.5	0.791701	-0.0574215	0.00516349	126.004	0.709262	0.0313363	0.00540816	61.3927	0.77251	-0.0276822	0.00484736	66.8205	0.728552	0.0317514	0.00554526	1244.62	0.794512	0.127195	0.00616883
Gm08_11504686	198.521	0.791754	-0.0456118	0.00515213	136.99	0.709259	0.0317614	0.00511399	181.841	0.772449	-0.0463064	0.00491937	134.897	0.728517	0.0438348	0.00582038	1452.76	0.794419	0.133566	0.00617652
Gm08_11523340	140.778	0.791781	-0.039573	0.00460265	108.672	0.709269	0.0291309	0.00550215	288.41	0.772389	-0.0601461	0.00510275	82.9195	0.728543	0.0355264	0.00533852	1341.62	0.794456	0.132382	0.00635025
Gm08_11528092	221.309	0.79174	-0.0495305	0.00462336	204.73	0.709231	0.039907	0.00525984	168.429	0.772453	-0.0458988	0.00471874	48.1674	0.728563	0.0270507	0.005495	1349.35	0.794453	0.132562	0.00609107
Gm08_11536026	157.134	0.791773	-0.0419544	0.00484623	255.299	0.709211	0.0448317	0.00535454	292.367	0.772386	-0.0607479	0.00484459	41.3347	0.728566	0.0251456	0.00545703	1471.01	0.794382	0.139046	0.00628541
Gm08_11553616	511.937	0.791521	-0.0953467	0.00491927	12.4696	0.709306	0.0127595	0.00523771	41.9124	0.772515	0.0286446	0.00507813	31.157	0.728568	0.02648	0.00542709	362.472	0.794954	0.0861059	0.00658521
Gm08_11589130	215.63	0.7917	-0.0677019	0.00526679	23.7116	0.709299	0.0189922	0.00523873	7.52621	0.772537	0.0133594	0.0051729	229.802	0.728417	0.0800382	0.00566355	182.919	0.795067	0.0672905	0.0061458
Gm08_11601368	262.268	0.79173	-0.0495842	0.00562169	609.836	0.709088	0.0639611	0.00495105	228.05	0.772432	-0.0487045	0.00540523	44.551	0.728567	0.0233343	0.00539423	1029.37	0.794682	0.105703	0.00676401
Gm08_11606336	145.217	0.791748	-0.0566665	0.00629354	26.7697	0.709297	-0.0205705	0.00519382	19.3782	0.772528	0.0218751	0.00565464	62.0046	0.728542	-0.0424817	0.00592997	14.0642	0.795197	0.0190426	0.00630904
Gm08_11614839	65.236	0.791807	-0.0373878	0.00674808	15.192	0.709304	-0.0152861	0.00507308	0.023394	0.772543	-0.0007463	0.00575161	3.05951	0.728587	0.00922169	0.00597296	36.6333	0.79518	0.0301829	0.00632048
Gm08_11634267	2764.07	0.790998	0.105469	0.00967338	165.419	0.709272	0.0219152	0.00545705	1011.72	0.772223	-0.0667148	0.00678664	683.315	0.728372	0.0586257	0.00598522	16.4945	0.795203	-0.00871613	0.00615281
Gm08_11639568	1317.03	0.791396	0.0816242	0.0070421	173.261	0.709265	0.0250809	0.00547504	393.356	0.772403	-0.0468276	0.00602039	0.342334	0.728589	-0.0014866	0.00645575	30.2036	0.795197	0.0132689	0.00601682
Gm08_11666646	17.3048	0.791841	0.0193497	0.00714474	0.188941	0.709312	0.00172375	0.00539227	7.01265	0.772538	0.0130025	0.00574021	0.971994	0.728588	-0.00524712	0.00585716	63.8947	0.795158	-0.040106	0.00576039
Gm08_11674313	15.3194	0.791845	-0.0150546	0.00640891	4.23836	0.70931	0.00687157	0.00554615	145.263	0.772455	0.0483417	0.00567693	150.221	0.728499	-0.052101	0.00594464	128.588	0.795126	-0.0465322	0.00597854
Gm08_11708796	365.654	0.79159	0.0894036	0.00566455	0.517128	0.709312	-0.0028482	0.00544476	399.214	0.772246	-0.0986574	0.00532994	17.9641	0.728576	0.0227213	0.00554604	149.335	0.795091	0.0616737	0.00568049
Gm08_11718711	47.1338	0.791821	0.0306055	0.00533797	55.7397	0.709282	0.0281641	0.00561817	3.24183	0.772541	-0.0084619	0.00485396	167.467	0.728468	0.0658071	0.0057836	15.3834	0.795197	0.0188389	0.00553939
Gm08_11730256	311.087	0.791627	0.0830886	0.00492144	53.3277	0.709282	0.0290851	0.00538721	15.7261	0.772531	-0.0197513	0.00519473	234.315	0.728409	0.0828859	0.00574975	0.699252	0.795207	-0.00425561	0.00582705
Gm08_11737862	50.6106	0.791817	0.0338322	0.00517055	78.2724	0.709267	0.0355947	0.00534971	1.13762	0.772542	0.00536695	0.00499359	2.49012	0.728587	0.00864704	0.00614034	1.97791	0.795206	0.00723017	0.00534766
Gm08_11742053	60.3707	0.79181	0.0365515	0.00492901	17.1134	0.709302	-0.0165143	0.00554466	1.28223	0.772542	-0.00563039	0.00513092	7.47602	0.728583	0.0147779	0.00613195	177.266	0.795068	0.0676319	0.00574546
Gm08_11750012	171.375	0.79173	0.0610846	0.00518089	11.9203	0.709305	0.0136564	0.00580874	18.4663	0.772529	-0.021198	0.00528899	104.316	0.72851	0.0548056	0.00631215	101.564	0.795129	0.0507911	0.0061687
Gm08_11755233	8.68718	0.791847	-0.013991	0.00549286	2.21615	0.709311	-0.005969	0.00575965	301.677	0.772315	0.0871521	0.00529853	124.657	0.728493	-0.0609775	0.0064839	0.991551	0.795207	0.00510659	0.00653428
Gm08_11763283	1147.7	0.791546	0.0588082	0.00533716	450.117	0.709219	-0.0308658	0.00578465	0.752446	0.772543	0.00159702	0.00500288	1074.47	0.72828	-0.066444	0.00664479	493.85	0.795064	0.0417801	0.00672052
Gm08_11772762	1078.92	0.791549	0.0601301	0.00516035	458.867	0.709213	-0.0327734	0.00556218	0.20564	0.772543	0.00088332	0.00464167	672.697	0.728383	-0.055989	0.00650582	2.1977	0.795207	0.00294843	0.00682491
Gm08_11783354	1021.68	0.791566	0.0582536	0.00493244	902.973	0.709117	-0.0457423	0.00609512	56.6562	0.772526	0.0146067	0.00498355	1228.82	0.728214	-0.0755067	0.00638789	46.2509	0.795194	0.0134741	0.00595156
Gm08_11796018	1237.47	0.791507	0.063788	0.00520168	801.642	0.70914	-0.0428977	0.00540034	1.98275	0.772542	0.00271749	0.00475414	1130.93	0.728246	-0.0719533	0.00646107	71.2132	0.795186	0.0166279	0.0061645
Gm08_11802244	1202.43	0.79152	0.0622604	0.00532725	504.244	0.709205	-0.0337348	0.00593539	0.0675734	0.772543	0.000496487	0.00538576	1174.51	0.728237	-0.0724895	0.00695874	39.4512	0.795196	0.0122489	0.006182
Gm08_11806597	1147.97	0.791531	0.0616254	0.00506014	441.245	0.709217	-0.0319202	0.00576145	15.1851	0.772538	0.00754648	0.00515466	1280.93	0.728199	-0.0769112	0.00653312	30.1451	0.795199	0.0108557	0.00602301
Gm08_11825241	189.196	0.791732	0.0572336	0.0050609	35.7756	0.709294	0.0214277	0.00592605	95.2081	0.77248	0.0425053	0.00496981	5.88906	0.728585	-0.0112872	0.00682876	153.844	0.795102	-0.0552549	0.00662072
Gm08_11844661	475.731	0.791504	0.103931	0.00494601	93.5859	0.709259	0.0390118	0.00584032	27.7323	0.772522	-0.0265597	0.00509153	2.16719	0.728588	0.00808636	0.00616422	2.06462	0.795206	0.00740421	0.00591683
Gm08_11849336	96.6575	0.791793	0.0402983	0.00485415	64.0949	0.70928	0.0281742	0.00544107	20.2796	0.77253	0.0193162	0.00491775	0.181167	0.728589	0.00194739	0.00596872	29.8688	0.795188	0.0239753	0.00593286
Gm08_11864234	195.286	0.791714	0.0649438	0.00499834	11.7115	0.709306	0.0134687	0.00549977	17.3844	0.77253	-0.0204499	0.00501477	4.26169	0.728586	-0.01097	0.00593662	34.0719	0.795182	-0.0292569	0.00599107
Gm08_11878840	183.047	0.791721	0.0633594	0.00485538	15.5275	0.709303	0.0156209	0.00566505	21.8116	0.772527	-0.0230999	0.00488993	59.7716	0.728544	-0.041492	0.00624975	17.8848	0.795194	-0.0213749	0.00616636
Gm08_11885469	39.1418	0.791826	0.028789	0.0046014	0.777268	0.709312	0.00343627	0.00612588	2.58719	0.772541	-0.00781064	0.00513153	22.381	0.728573	0.0248917	0.00571889	8.1374	0.795202	-0.0141559	0.00646463
Gm08_11908215	274.94	0.791679	0.0683031	0.00472683	6.6941	0.709309	0.00910599	0.00584675	48.1072	0.772512	-0.0298789	0.00512366	205.453	0.728456	-0.0657387	0.00630275	31.5317	0.795186	-0.0247422	0.00653316
Gm08_11917991	449.16	0.791602	0.0768515	0.00486109	24.6129	0.709301	0.0155145	0.00622683	307.018	0.772368	-0.0661349	0.0049881	11.1591	0.728583	0.0133243	0.005988	20.6563	0.795196	-0.0175569	0.00727948
Gm08_11924395	66.4241	0.791845	0.0071009	0.00466442	3229.84	0.708973	-0.0421315	0.00703724	1683.4	0.772312	-0.0373538	0.00615251	640.184	0.7285	0.0247838	0.00738936	661.835	0.795112	-0.0239567	0.0089652
Gm08_11933280	179.202	0.791738	0.0557805	0.00479572	18.4196	0.709303	-0.01541	0.00622063	185.855	0.77242	-0.0595783	0.00488002	462.343	0.728282	-0.100612	0.00739363	788.779	0.794662	0.125436	0.00893034
Gm08_11939524	341.973	0.791648	0.0719049	0.00482738	7.60827	0.709309	-0.00914151	0.00628937	353.855	0.772326	-0.0765548	0.00487655	8.13129	0.728584	0.0123953	0.00704007	0.764619	0.795208	-0.00364044	0.00820741
Gm08_11969594	20.2501	0.791851	0.00427322	0.00484088	5513.98	0.708684	-0.0596795	0.00597463	89.1327	0.772529	-0.00943795	0.00468506	939.735	0.728444	0.0334031	0.00773099	2208.26	0.794858	-0.047989	0.00853389
Gm08_11981743	30.9484	0.791849	0.00527613	0.00480091	5826.84	0.708649	-0.0612664	0.00649027	192.708	0.772514	-0.013861	0.00488425	1286.99	0.728391	0.0390498	0.00936297	2240.58	0.794854	-0.0482821	0.00936267
Gm08_12005264	17.9628	0.791841	0.0195759	0.00463456	301.113	0.709146	-0.0675537	0.00586402	21.5992	0.772527	-0.0227637	0.00479052	125.873	0.728493	-0.0601683	0.00705637	6.34206	0.795203	0.0125997	0.0072537
Gm08_12018793	35.9672	0.791829	0.0270019	0.00476931	277.319	0.709163	-0.0632935	0.00606094	127.636	0.772451	-0.0538295	0.00455981	104.955	0.728512	-0.053252	0.00667813	5.65178	0.795204	-0.0115736	0.00740724
Gm08_12026627	50.6956	0.791819	0.0313807	0.0047126	150.679	0.709233	-0.0456354	0.00582632	26.6904	0.772524	-0.0240999	0.00511291	169.529	0.728467	-0.0662783	0.00622787	9.10108	0.795201	-0.0143774	0.00645964
Gm08_12033276	24.841	0.791837	0.0221361	0.00472849	227.623	0.709191	-0.0565047	0.00523695	56.1061	0.772503	-0.0352124	0.00477817	109.723	0.728509	-0.0537458	0.00604877	32.599	0.795184	0.0274213	0.00631756
Gm08_12037820	286.962	0.791724	0.0496032	0.00484898	5.7018	0.70931	-0.00597157	0.0054035	1619.39	0.771803	-0.122189	0.00572653	5.03653	0.728587	0.00717408	0.00601782	111.723	0.795154	0.0328777	0.00615177
Gm08_12052338	97.6272	0.791785	0.044774	0.0049716	673.432	0.708947	-0.0992722	0.00541637	11.6874	0.772534	-0.0164114	0.00512719	106.245	0.72851	-0.0540734	0.00587868	32.3423	0.795183	0.0278881	0.00622094
Gm08_12079307	24.4725	0.791839	0.0191339	0.00513179	478.036	0.709089	-0.0718132	0.00524935	21.9505	0.772529	-0.0189822	0.00495332	75.2754	0.728543	-0.0376061	0.0060768	120.546	0.795131	0.0454861	0.00570104
Gm08_12089937	5.72855	0.79185	-0.010368	0.00502061	148.427	0.709235	-0.0445296	0.00521278	0.0740366	0.772543	0.00124402	0.00537434	0.497461	0.728589	-0.00349867	0.00571635	27.1863	0.795188	0.0243599	0.00633548
Gm08_12107226	0.0702729	0.791854	-0.00117938	0.00505192	204.289	0.709203	-0.0539439	0.00545522	4.92466	0.772539	-0.0104546	0.00511395	31.9011	0.728566	-0.0290623	0.00556487	1.09579	0.795207	-0.00503794	0.00582733
Gm08_12118339	3.05615	0.791852	-0.00724833	0.00531698	371.543	0.709124	-0.0688191	0.00568816	25.0783	0.772526	-0.0218616	0.0048886	0.892633	0.728589	-0.00445558	0.00552591	28.4973	0.795188	-0.0238198	0.00584899
Gm08_12138362	92.3618	0.791796	-0.0390467	0.0053121	250.72	0.709188	-0.0551858	0.00573703	18.0288	0.772531	0.0181384	0.00487658	82.5851	0.728535	-0.0418072	0.0054655	10.6759	0.795201	-0.0142687	0.00547158
Gm08_12143360	15.3198	0.791844	-0.016271	0.00509415	73.7996	0.709275	0.0308519	0.00542598	19.913	0.77253	-0.0195209	0.004872	16.6919	0.728578	0.0192726	0.00533118	0.552357	0.795208	0.00332337	0.00571592
Gm08_12150071	63.6329	0.791814	-0.0320274	0.00504603	295.614	0.709167	0.0593909	0.00569998	14.4007	0.772534	-0.0160088	0.00481438	1.0282	0.728589	0.00460233	0.00532294	7.9474	0.795203	0.0121582	0.00547676
Gm08_12160910	0.775021	0.791853	0.00289959	0.00519931	38.5961	0.709297	-0.0174422	0.00546915	7.9092	0.772539	-0.00973591	0.00468824	7.20832	0.728585	-0.010027	0.00540867	120.888	0.795142	-0.0389071	0.00546563
Gm08_12168618	163.008	0.791746	0.0544121	0.00508279	97.1021	0.709262	0.035646	0.00549733	184.299	0.772418	-0.0608668	0.00461964	35.7982	0.728565	-0.0288863	0.00528929	0.0127201	0.795208	0.000516986	0.00573228
Gm08_12172900	172.702	0.791744	0.0539739	0.00526075	330.265	0.709148	0.0634967	0.00513641	185.714	0.772422	-0.0586751	0.00475568	0.324225	0.728589	-0.0026218	0.00551451	0.313528	0.795208	0.00246563	0.00576172
Gm08_12182760	86.3776	0.791811	0.0294517	0.00529688	44.6215	0.709295	-0.0179551	0.00547146	0.533196	0.772543	0.00243376	0.00485206	42.0698	0.728568	0.0233545	0.00527421	21.2389	0.795197	-0.015701	0.00555198
Gm08_12187910	127.936	0.791791	0.0356751	0.00525384	53.7879	0.709291	-0.0198621	0.0051253	37.1352	0.772524	-0.0202111	0.00480548	0.089116	0.728589	0.0010692	0.00495264	24.2466	0.795195	-0.0166942	0.00564242
Gm08_12243725	504.084	0.79159	0.076143	0.00555243	4.70178	0.70931	0.00616852	0.00534909	162.762	0.772455	-0.0458785	0.00499693	77.0741	0.728546	0.0346211	0.00519097	37.3245	0.795187	-0.0224423	0.00559766
Gm08_12259397	450.694	0.79162	0.0712862	0.00558449	17.2459	0.709305	-0.0117072	0.0052689	166.165	0.772454	-0.0458382	0.0050971	11.7972	0.728583	0.0133622	0.00541886	44.663	0.795183	-0.0242783	0.00578878
Gm08_12265271	83.8739	0.791798	0.0397395	0.00497463	80.3395	0.70927	0.0327813	0.00542917	80.6215	0.772487	-0.0411109	0.00497896	63.8182	0.728544	-0.039554	0.00543613	32.1535	0.795185	0.0265329	0.00580844
Gm08_12280980	0.00621948	0.791854	-0.00033262	0.00520068	303.083	0.709159	0.0621695	0.00569405	7.13595	0.772538	0.0118975	0.00522225	10.1283	0.728582	-0.0153619	0.00571524	16.0104	0.795197	0.01821	0.00554795
Gm08_12290092	29.6798	0.791839	0.0179903	0.00540701	126.909	0.709262	0.0315025	0.00523813	0.198982	0.772543	0.00156178	0.00514998	62.1652	0.728555	0.0302896	0.00622605	41.6806	0.795185	-0.0230866	0.00582404
Gm08_12294329	143.082	0.791783	0.03851	0.00531774	236.236	0.70922	0.0420699	0.00554876	163.995	0.772459	-0.0436051	0.00489068	145.783	0.728512	0.044899	0.00552906	28.1751	0.795193	0.0184666	0.00537708
Gm08_12301232	0.000335016	0.791854	7.37278e-05	0.00533173	61.6026	0.709282	0.0273071	0.00520431	0.133763	0.772543	-0.00154985	0.0049864	51.7848	0.728556	-0.0326521	0.00584625	25.8251	0.795191	0.0220125	0.00567497
Gm08_12307960	0.000240845	0.791854	-5.01801e-05	0.00510716	455.803	0.709136	0.0581876	0.00582674	53.0771	0.772516	-0.0248864	0.0053346	547.302	0.728301	0.0869937	0.00635237	0.643293	0.795208	0.00279943	0.00522626
Gm08_12323503	64.5042	0.791811	-0.0344018	0.00524502	124.39	0.709248	0.0407465	0.00555434	2.07528	0.772541	0.00652109	0.00531122	3.64904	0.728587	-0.00937363	0.00589539	62.4813	0.795163	0.0365586	0.00543393
Gm08_12335397	117.981	0.791776	-0.0466022	0.00525595	28.0938	0.709298	0.0193339	0.00547159	44.2792	0.772513	0.0301371	0.00499608	8.27873	0.728583	-0.0140848	0.00539271	0.098244	0.795208	0.0014507	0.00542019
Gm08_12370707	20.6158	0.791844	-0.0144937	0.00547602	18.8047	0.709305	0.0116794	0.00552427	143.907	0.77247	0.0403547	0.00517733	154.33	0.72851	0.0451888	0.00554946	45.2391	0.795184	-0.0231253	0.00526627
Gm08_12384730	47.3505	0.791823	-0.0285884	0.00509454	500.638	0.709061	0.0792076	0.00524873	45.2277	0.772513	0.0294318	0.00484706	0.131387	0.728589	0.00170349	0.00576215	0.0645475	0.795208	0.00113648	0.005584
Gm08_12415380	12.3597	0.791846	-0.014061	0.0053762	101.001	0.709263	0.0341588	0.00517268	97.2793	0.772481	0.0414752	0.00528156	393.798	0.728337	-0.0894548	0.00576852	11.6726	0.7952	-0.0146878	0.00548826
Gm08_12442319	3.17464	0.791852	-0.00660054	0.00537693	294.303	0.70918	0.054171	0.00543037	115.958	0.772475	0.0417099	0.00536548	11.166	0.728583	-0.0137469	0.0057868	3.6035	0.795206	-0.00752102	0.00545403
Gm08_12457603	76.0824	0.791818	0.0268069	0.00552381	60.4325	0.70929	0.0203103	0.00530494	5.39272	0.77254	-0.00751698	0.00509422	222.069	0.728479	0.0521063	0.00607399	145.311	0.795133	-0.039877	0.00568425
Gm08_12463835	42.8895	0.791833	0.020063	0.00552719	47.4112	0.709295	0.0178825	0.00523933	13.2022	0.772536	-0.0117262	0.00553616	556.436	0.728314	0.0822577	0.0067953	191.342	0.79511	-0.0456199	0.00558797
Gm08_12487914	67.3007	0.791813	-0.0318763	0.00540726	1.63071	0.709311	0.00424086	0.00544969	141.122	0.772456	0.0485475	0.00523901	88.133	0.728534	-0.0412541	0.00603534	90.2268	0.79515	-0.0396829	0.00530338
Gm08_12511707	66.1058	0.791815	-0.0311392	0.00510405	59.627	0.709285	0.0251949	0.00546106	173.678	0.772438	0.053032	0.0052039	34.6978	0.728568	-0.0254495	0.00603791	88.2147	0.795152	-0.0386413	0.00513592
Gm08_12521086	156.783	0.791759	-0.0491392	0.00508814	77.1785	0.709276	0.0293292	0.00523413	301.649	0.772355	0.0716272	0.00508026	18.8736	0.728577	0.0192403	0.0060291	130.851	0.795122	-0.0482344	0.00579218
Gm08_12529296	105.26	0.79179	-0.0404413	0.00504457	13.1904	0.709306	0.0121824	0.0053675	276.543	0.77237	0.068988	0.0049959	293.849	0.728403	-0.0765845	0.00594718	81.7168	0.795154	-0.0383384	0.00563408
Gm08_12564524	17.5122	0.791843	-0.0171525	0.0049965	16.9646	0.709304	-0.0142912	0.00522163	25.0948	0.772527	0.0217001	0.00495543	2.98849	0.728587	-0.00812727	0.00617909	120.746	0.795125	-0.0486333	0.00586164
Gm08_12569559	22.55	0.791841	-0.0176055	0.00492065	43.4019	0.709293	0.0207725	0.0052832	0.00055101	0.772543	9.13124e-05	0.00504167	565.898	0.728255	0.0990705	0.0063346	50.823	0.795177	-0.0283544	0.00580797
Gm08_12590095	42.1958	0.791828	0.0260135	0.00471316	6.9151	0.709309	0.00889151	0.00516097	115.528	0.772469	-0.045479	0.00513414	38.885	0.728564	0.0286399	0.00581562	239.793	0.795047	-0.0669438	0.00579303
Gm08_12597143	6.70413	0.791849	0.010677	0.00490885	0.691855	0.709312	-0.00288707	0.00529766	10.4207	0.772536	-0.0141161	0.00474971	37.2138	0.728564	0.0291536	0.00547408	338.421	0.794974	-0.0821471	0.00623637
Gm08_12605702	2.43429	0.791852	0.00630547	0.00473504	5.51316	0.709309	0.0079972	0.00537495	1.08208	0.772542	-0.00445095	0.00469211	31.1011	0.728569	0.0259959	0.00531301	551.14	0.794835	-0.102575	0.00607602
Gm08_12630308	32.8622	0.791833	-0.0230389	0.0048238	0.00147135	0.709312	-0.000130104	0.0053329	75.8186	0.772494	0.0370426	0.0047938	20.4441	0.728576	0.0209473	0.00570852	442.012	0.79491	-0.0913469	0.00583323
Gm08_12650769	144.536	0.791764	-0.0480838	0.00514385	129.878	0.70925	0.0384164	0.00549249	3.50461	0.772541	0.00791934	0.00483868	15.4503	0.728579	0.0180663	0.00555008	22.568	0.795193	-0.0205328	0.00581418
Gm08_12666486	47.4638	0.791825	0.0270898	0.00502055	0.0326664	0.709312	0.000598788	0.0054433	225.04	0.772402	-0.0621893	0.00504188	396.176	0.728338	0.0890954	0.00502806	190.404	0.795083	-0.0584655	0.00580829
Gm08_12680864	23.1828	0.79184	-0.0182237	0.00529005	321.294	0.709166	0.0574019	0.0056942	0.0715746	0.772543	0.00106721	0.00506814	479.416	0.728297	0.0942525	0.00545358	100.161	0.795145	-0.0408007	0.00629233
Gm08_12693538	196.289	0.791737	-0.0541127	0.00541066	925.59	0.708885	0.0990735	0.00594472	0.0249779	0.772543	-0.000644633	0.0049011	665.311	0.728173	0.113844	0.00514398	33.1165	0.795187	-0.0239859	0.00656011
Gm08_12703609	20.5751	0.791841	-0.0181386	0.00539122	3.36403	0.709311	0.00619158	0.0058612	1.88954	0.772542	-0.00582158	0.00490881	490.156	0.728269	0.101949	0.0053203	199.559	0.795074	-0.0611111	0.00636218
Gm08_12777126	6.51164	0.79185	-0.010418	0.00539338	273.695	0.70918	0.0563492	0.00590784	10.1995	0.772536	-0.0138557	0.00483287	564.034	0.728209	0.112782	0.00548713	264.085	0.795027	-0.0719895	0.00609094
Gm08_12793503	143.693	0.791769	-0.0459389	0.00537145	309.108	0.709171	0.056547	0.00566622	94.1505	0.772485	0.0393293	0.00519238	157.56	0.728491	0.0552202	0.00552412	425.073	0.794935	-0.0853629	0.00654666
Gm08_12811110	69.8949	0.791808	-0.0354882	0.00526529	27.7771	0.709298	-0.018617	0.00573634	0.18588	0.772543	0.00195688	0.00485888	238.307	0.728419	0.0776407	0.0055172	207.879	0.795059	-0.0667841	0.00591564
Gm08_12819881	51.7293	0.79182	-0.0300074	0.0054981	55.4659	0.709285	0.0259213	0.00589919	1.93018	0.772542	-0.00617392	0.00495563	103.831	0.728517	0.0497859	0.00570534	68.8519	0.79516	-0.0376495	0.00599925
Gm08_12841079	52.1479	0.791819	-0.0308508	0.00522645	85.2607	0.709269	0.0327838	0.00527174	4.10058	0.77254	0.0092591	0.00482789	235.241	0.72842	0.0778523	0.0054377	330.701	0.794969	-0.0848394	0.00586111
Gm08_12868193	83.0848	0.791798	-0.0397884	0.00533029	0.576315	0.709312	0.00274786	0.00583344	27.6379	0.772523	0.0246175	0.00473308	88.7147	0.728524	0.0491854	0.00528795	202.466	0.795058	-0.0679774	0.00585213
Gm08_12876363	302.795	0.791658	-0.0729157	0.00550668	47.9632	0.709288	0.0241369	0.0053559	67.2864	0.772497	0.0367466	0.0046963	385.784	0.728318	0.0974362	0.00525372	221.731	0.795051	-0.0680804	0.00591132
Gm08_12921269	1.66682	0.791853	-0.00559013	0.0052901	23.6882	0.7093	-0.0174745	0.00527667	1.70089	0.772542	0.00606564	0.00449659	0.132939	0.728589	-0.00189525	0.00552433	62.4525	0.795162	-0.0374978	0.00545473
Gm08_12937984	14.9421	0.791844	-0.0166675	0.00516545	28.4016	0.709298	0.0190489	0.00566181	24.3124	0.772526	-0.0228402	0.00472911	131.967	0.728492	0.0595015	0.0054681	30.3452	0.795186	-0.0260337	0.00596941
Gm08_12965242	79.7311	0.791803	-0.0370933	0.0048797	4.34157	0.70931	0.00718502	0.00522156	37.6928	0.772518	0.027342	0.00489465	35.3725	0.728564	0.0294946	0.00550392	28.593	0.795188	-0.0243014	0.00589493
Gm08_12984701	38.2112	0.791829	-0.0254374	0.00490568	2.35933	0.709311	0.00525664	0.00516644	0.975331	0.772542	-0.00435269	0.00492393	78.4178	0.728535	0.0433806	0.00578602	125.607	0.79512	-0.0504054	0.00585844
Gm08_13003745	8.21219	0.791848	-0.0123287	0.00527392	12.892	0.709306	0.0128127	0.00549662	22.1027	0.772527	-0.0217462	0.00506461	8.95986	0.728583	0.0155063	0.00599353	91.5429	0.795141	-0.0451462	0.00603401
Gm08_13016330	14.8842	0.791845	0.014079	0.0048572	6.04638	0.70931	-0.00753127	0.00552012	0.140007	0.772543	-0.00145847	0.00486433	0.189155	0.728589	0.00187606	0.00550901	5.92375	0.795204	0.00968411	0.00588774
Gm08_13021007	230.816	0.791721	0.056621	0.00522632	15.6194	0.709305	-0.0123107	0.00566753	84.4571	0.772492	-0.0367533	0.00477764	23.6453	0.728574	0.0217268	0.00561555	8.65379	0.795203	0.0120048	0.00613948
Gm08_13030882	73.3215	0.791814	0.0302571	0.00499407	327.037	0.709174	-0.0538286	0.00516706	35.5907	0.772523	-0.0225073	0.00493944	94.7423	0.728533	0.0406225	0.00534534	0.0581201	0.795208	-0.000928504	0.00602212
Gm08_13054636	0.226109	0.791854	0.00175303	0.00526308	21.49	0.709303	-0.0141723	0.00515428	0.497	0.772543	0.00279064	0.00477294	300.427	0.728401	0.0767428	0.0058792	8.22837	0.795203	-0.0115851	0.00616264
Gm08_13061530	3.77984	0.791852	-0.00730055	0.00508829	40.9439	0.709294	-0.0198827	0.00533441	5.34698	0.77254	0.00934002	0.00481393	119.641	0.728512	0.0496044	0.00563799	51.7912	0.795175	-0.0296517	0.00618645
Gm08_13075103	0.00358007	0.791854	-0.000210181	0.00494138	24.2856	0.709302	0.0144311	0.00545422	66.3123	0.772505	0.0305547	0.00443049	225.449	0.728456	0.0623939	0.00591916	15.3799	0.795199	-0.0150213	0.0062002
Gm08_13103485	3.91767	0.791852	0.0073001	0.00506992	54.6602	0.709288	-0.0225949	0.00554865	9.5917	0.772537	-0.0122679	0.0047423	107.227	0.728522	0.0459101	0.00574315	48.4104	0.795178	0.0281182	0.00624539
Gm08_13114345	28.8543	0.791838	0.0185322	0.00480463	34.0519	0.709298	-0.0167737	0.00563195	10.9236	0.772537	0.0121678	0.00490836	8.44448	0.728584	0.0118266	0.00597427	220.792	0.795079	0.0558378	0.00624511
Gm08_13165879	0.104208	0.791854	0.00104351	0.00487584	41.1331	0.709296	-0.0173807	0.00532387	0.265709	0.772543	0.00177616	0.00498295	8.07875	0.728585	-0.0108069	0.00591034	473.305	0.79495	0.0765113	0.00575043
Gm08_13210755	120.979	0.791792	0.0363039	0.00485899	85.2524	0.709279	-0.0253811	0.00511853	170.891	0.772452	-0.0461922	0.00498349	70.9744	0.72855	-0.0331655	0.00555023	119.826	0.795141	0.0394757	0.00582846
Gm08_13229840	404.319	0.791651	0.0654047	0.00474198	200.469	0.709235	-0.0385383	0.00553942	102.263	0.772489	-0.0352027	0.00508467	46.4714	0.728564	-0.026416	0.00544931	203.522	0.795096	0.0506806	0.00539542
Gm08_13242790	242.084	0.791735	0.0495666	0.00484621	249.617	0.709218	-0.042211	0.00507518	87.331	0.772498	-0.0318079	0.00519964	282.849	0.728438	-0.0635038	0.0052741	273.78	0.79506	0.0574795	0.00559994
Gm08_13274226	8.47859	0.79185	0.00861509	0.00473997	289.425	0.70921	-0.0424904	0.00503455	60.4746	0.772514	-0.0244533	0.00516595	8.18765	0.728585	-0.00985706	0.00500704	75.1067	0.795171	0.02783	0.00572101
Gm08_13282668	166.653	0.791777	0.0384358	0.00485454	55.205	0.709293	-0.0185886	0.0052405	0.0166176	0.772543	-0.000408328	0.00524371	806.772	0.728191	-0.0990024	0.00522876	138.396	0.795139	0.0380485	0.00614512
Gm08_13296014	270.571	0.791726	0.0504238	0.0050268	25.5742	0.709303	-0.0130204	0.00505643	33.9038	0.772526	-0.0190371	0.00472916	315.524	0.728427	-0.0642394	0.00541016	271.848	0.795067	0.055025	0.00592012
Gm08_13309733	6.41011	0.791851	0.00803105	0.00508815	254.677	0.709217	-0.0421947	0.00515735	11.4668	0.772537	-0.0114811	0.00490619	288.86	0.728435	-0.0640147	0.00554574	52.607	0.79518	0.0250995	0.00594766
Gm08_13320998	33.2195	0.791837	0.018342	0.00527406	177.563	0.709245	-0.0353545	0.00520232	15.2385	0.772535	-0.0132853	0.00490789	365.902	0.728393	-0.0723949	0.00543156	191.822	0.795105	0.0481027	0.00563888
Gm08_13327429	98.39	0.791807	0.0302987	0.00551077	105.194	0.709274	-0.0262072	0.00495795	4.39071	0.772541	-0.00681748	0.00476297	632.667	0.728267	-0.0902518	0.0056174	646.174	0.794875	0.0844094	0.00558387
Gm08_13510396	661.172	0.791612	-0.0609897	0.00581976	0.106237	0.709312	-0.00064952	0.00539841	40.9322	0.772527	0.0161708	0.004968	563.289	0.728365	-0.0665349	0.00570248	2.63393	0.795207	0.00418798	0.00529475
Gm08_13521935	677.879	0.791606	-0.0616378	0.00578305	0.808587	0.709312	0.00178828	0.0056014	28.1484	0.772532	0.0133854	0.00505573	731.695	0.728299	-0.0757003	0.00530937	2.19501	0.795207	0.0038161	0.00556953
Gm08_13535302	330.752	0.791736	-0.0419125	0.0056838	9.46523	0.70931	0.00596396	0.00559096	17.3542	0.772536	0.0102088	0.00490168	781.067	0.728289	-0.0756633	0.00541311	0.700383	0.795208	0.00209421	0.00564176
Gm08_13554353	793.138	0.791584	-0.0619673	0.00562392	3.71468	0.709311	-0.00357752	0.00565157	181.48	0.772479	0.0315313	0.005019	259.405	0.728494	-0.0417247	0.00538549	43.283	0.795192	-0.0157243	0.00575412
Gm08_13561502	700.727	0.79161	-0.0596235	0.00535316	15.7347	0.709308	-0.00751341	0.00542998	245.839	0.772454	0.0376651	0.00493003	1129.87	0.728161	-0.0898425	0.0057512	0.438116	0.795208	-0.00162332	0.00594664
Gm08_13567431	719.572	0.7916	-0.0612023	0.00535857	77.1277	0.709291	-0.0168717	0.00573047	185.729	0.772475	0.033194	0.00490965	713.422	0.728314	-0.0725307	0.00618867	1.53574	0.795207	-0.00308123	0.00582202
Gm08_13620776	538.307	0.791674	-0.0502818	0.00515695	66.762	0.709295	0.0148938	0.005384	248.627	0.772456	0.0363909	0.00468371	236.419	0.728503	-0.0394026	0.00672511	83.6397	0.795177	-0.0215506	0.00594714
Gm08_13626362	479.018	0.791694	-0.0473839	0.0052877	99.9311	0.709286	0.018212	0.00546597	164.741	0.772486	0.0295781	0.00465422	264.87	0.728493	-0.0416014	0.00776993	39.6599	0.795194	-0.0148181	0.00590931
Gm08_13635151	499.836	0.791693	-0.0465808	0.00517443	439.465	0.709203	0.0367968	0.00586789	424.565	0.772401	0.045582	0.00471028	297.755	0.728486	-0.0421457	0.00847456	9.57232	0.795205	0.00699084	0.00611643
Gm08_13644094	676.552	0.79165	-0.0507389	0.00537498	686.227	0.709152	0.0431998	0.00678225	844.73	0.772281	0.059825	0.00482332	397.478	0.728463	-0.044659	0.00911586	32.4328	0.795197	-0.0119821	0.00610484
Gm08_13943609	4286.83	0.791388	-0.0460578	0.00683478	6216.68	0.708775	-0.0480817	0.00717299	2478.97	0.772269	0.0365333	0.00546611	5343.04	0.727995	0.0573868	0.00970554	2029.26	0.794972	0.033812	0.00731692
Gm08_14217744	1190.7	0.791723	-0.0246156	0.00553587	4120.72	0.70895	-0.0397499	0.00695805	398.715	0.772498	0.0148651	0.00522738	3284.86	0.728218	0.0457142	0.00809052	1534.6	0.795027	0.0298235	0.00756492
Gm08_15154739	598.098	0.791785	0.0181847	0.00827223	9132.38	0.708475	-0.0617757	0.00857737	278.528	0.772511	-0.0127906	0.00556367	3875.03	0.72815	0.0497889	0.00828089	0.550344	0.795208	0.000582255	0.00664117
Gm08_15627962	262.219	0.791808	0.0181746	0.00551318	56.8363	0.709304	-0.00722048	0.00782366	697.231	0.77242	-0.0307971	0.00589349	1600.12	0.72831	0.0492548	0.0064416	3082.1	0.794638	-0.0662238	0.00840518
Gm08_15678199	51.474	0.791845	0.00802818	0.00517582	2739.73	0.708945	-0.0494715	0.00675052	301.32	0.77249	-0.0203643	0.00539267	308.874	0.728534	0.0221443	0.0065808	2289.25	0.794782	-0.057365	0.00690967
Gm08_15689456	3.74403	0.791853	0.00219757	0.00522414	1505.54	0.709107	-0.0372012	0.00707679	190.878	0.772509	-0.0164596	0.0051474	325.841	0.72853	0.0231116	0.00669281	1583.84	0.794909	-0.0484597	0.00642503
Gm08_15800128	523.35	0.791649	-0.0579108	0.00528682	310.776	0.709221	0.0365243	0.0066814	141.573	0.772484	0.0326266	0.00548284	68.5971	0.728559	0.0256839	0.00688589	433.811	0.79502	-0.0582197	0.00668063
Gm08_15807568	176.599	0.791782	-0.0350992	0.00506284	428.221	0.709181	0.0446156	0.00609675	35.256	0.772528	0.0170738	0.00508481	36.6623	0.728572	0.0198904	0.00672217	420.934	0.795017	-0.0601061	0.00652858
Gm08_15818736	7.35584	0.791851	-0.00764636	0.00525043	804.407	0.709052	0.0647538	0.00650558	57.3287	0.772516	0.0234111	0.00479792	0.473398	0.728589	0.00246618	0.00716279	499.735	0.794964	-0.0703678	0.00640423
Gm08_15831036	50.2041	0.791832	-0.0200955	0.0054435	944.315	0.709005	0.0704714	0.0060602	138.729	0.772478	0.0366965	0.00481332	90.0788	0.728543	-0.0343944	0.00683699	673.775	0.794877	-0.0823136	0.00637797
Gm08_15840854	69.315	0.79183	-0.0185578	0.00529963	1935.1	0.708806	0.0810937	0.00658167	349.887	0.772417	0.0448376	0.00484204	348.975	0.728456	0.0501208	0.00705818	62.9099	0.795184	-0.0193984	0.0058934
Gm08_15854057	136.013	0.791802	-0.0288306	0.00535331	193.207	0.709256	0.0282731	0.00649547	0.0657942	0.772543	0.000686235	0.00453057	8.66437	0.728586	0.00889084	0.00688706	65.095	0.79518	-0.0220079	0.00572169
Gm08_15862930	236.498	0.791746	-0.045505	0.00493958	1107.01	0.708939	0.0791537	0.0059756	17.9688	0.772534	0.0138559	0.00480911	9.8922	0.728584	0.0120909	0.00670698	134.122	0.795139	-0.0385198	0.0056731
Gm08_15867152	9.56255	0.791851	-0.00678644	0.0048359	1980.75	0.708801	0.0810011	0.00590114	95.4946	0.772509	0.0230395	0.00478912	700.839	0.728328	0.0696859	0.00747045	39.7396	0.795193	-0.0151643	0.00575279
Gm08_15872031	166.987	0.791777	-0.0382687	0.00470148	1048.27	0.708958	0.0770783	0.00604915	20.2851	0.772533	0.0147354	0.00466468	2.5308	0.728588	0.00612286	0.00649681	254.905	0.795076	-0.0531472	0.00573883
Gm08_15878035	127.523	0.791796	-0.0333031	0.00452783	883.201	0.709015	0.0704846	0.00598673	2.80065	0.772542	0.00544975	0.00467617	0.000835174	0.728589	-0.000110594	0.00709948	181.405	0.795115	-0.04463	0.00601206
Gm08_15885050	95.3898	0.791816	-0.0247789	0.00489526	1462.96	0.70888	0.0797176	0.00610371	1.96454	0.772542	-0.00386256	0.00463044	90.6389	0.728549	0.0298275	0.0071552	11.5625	0.795203	-0.00955121	0.00580015
Gm08_15894785	37.9616	0.791836	-0.0184617	0.00495042	671.757	0.709083	0.0623919	0.00604549	1.02808	0.772542	-0.00335937	0.00431194	0.0690138	0.728589	0.00102557	0.00723764	62.022	0.795176	-0.026549	0.00592974
Gm08_15918983	0.746383	0.791854	-0.00165926	0.00481744	12.5026	0.709309	-0.00561368	0.00702607	40.7195	0.77253	0.0131153	0.00451876	52.6645	0.728572	-0.0165253	0.00846127	10.8597	0.795204	-0.00691299	0.00634619
Gm08_15929442	42.7035	0.791839	0.0145862	0.00482278	727.953	0.709121	0.0499246	0.00597658	26.6173	0.772533	0.0123943	0.00480824	291.524	0.728478	0.0459627	0.00743855	0.144905	0.795208	0.000932889	0.00582342
Gm08_15946802	0.0305175	0.791854	-0.000395628	0.0054649	1201.42	0.708994	0.0647094	0.00633904	136.505	0.772493	0.0284963	0.00480854	367.904	0.728446	0.0524927	0.00786152	0.202249	0.795208	-0.00111892	0.00573799
Gm08_15975626	26.2126	0.791842	-0.0150301	0.00530631	472.427	0.709153	0.0516819	0.00593286	7.14959	0.772539	-0.00865502	0.00530229	1.87508	0.728588	0.00518995	0.00710393	9.20252	0.795203	-0.00999422	0.00577067
Gm08_16003038	143.276	0.791789	-0.035236	0.00546401	301.649	0.709211	0.0412238	0.0056298	96.0943	0.772496	0.0318042	0.00523306	0.1547	0.728589	0.00149294	0.00732619	0.00258984	0.795208	0.000168068	0.00602352
Gm08_16029724	91.5206	0.791812	-0.0280582	0.00573312	571.778	0.70912	0.0565697	0.00582303	45.0891	0.772521	0.021694	0.00527506	13.3028	0.728582	0.0137705	0.00644635	1.48616	0.795207	0.00400921	0.00618237
Gm08_16059673	7.3446	0.791851	-0.00754168	0.00519916	670.476	0.709097	0.0584831	0.00571928	50.9397	0.77252	-0.0217135	0.00511277	75.6533	0.728552	0.0304601	0.0068588	11.7044	0.795202	-0.0106025	0.00621706
Gm08_16072657	254.299	0.791767	0.0350198	0.00565728	771.348	0.709111	0.0510781	0.00548713	530.478	0.772356	-0.0539139	0.00531846	378.418	0.728451	0.0499295	0.00657396	130.548	0.79516	0.0273143	0.00642042
Gm08_16097438	106.916	0.791807	0.0292379	0.00556322	487.101	0.709154	0.0506188	0.00575104	89.8858	0.772501	-0.0293124	0.00541286	147.08	0.728515	0.0431246	0.00645403	148.837	0.795135	0.0384211	0.0066731
Gm08_16106929	10.9642	0.791849	-0.00954055	0.00516344	555.474	0.709128	0.0550739	0.00555894	16.0563	0.772535	-0.0126919	0.00503132	72.7697	0.728551	0.0314432	0.00681051	31.2265	0.795192	0.01802	0.00712954
Gm08_16131320	91.421	0.791815	-0.0260699	0.00579527	957.095	0.709011	0.0685872	0.00576797	61.1293	0.772516	0.0232442	0.00478061	26.9606	0.728576	0.0176692	0.00691214	22.5063	0.795197	-0.014371	0.00781549
Gm08_16190790	172.873	0.791806	0.0236832	0.00520547	41.9252	0.709303	-0.00965304	0.00585182	0.501454	0.772543	-0.00136894	0.00520096	298.092	0.728498	-0.03732	0.00649615	538.708	0.795043	0.0457709	0.00757171
Gm08_16197224	263.232	0.791782	0.0288105	0.00518654	173.546	0.709276	-0.019408	0.00582228	5.74186	0.772541	-0.00456159	0.00490858	601.428	0.728408	-0.0520794	0.00719132	391.079	0.79509	0.0384096	0.00719111
Gm08_16206319	54.0231	0.791841	0.0116646	0.00537999	1.95593	0.709312	0.00184762	0.00559027	214.663	0.772488	0.0247663	0.00506309	22.0553	0.728583	-0.00876479	0.0065768	209.864	0.795152	0.0250024	0.00709584
Gm08_16211701	234.6	0.791789	0.027269	0.00544102	186.935	0.709273	-0.0201771	0.00560511	25.856	0.772535	-0.00970714	0.00509667	214.614	0.728524	-0.03122	0.00642942	360.664	0.795099	0.0369894	0.00758575
Gm08_16216710	98.9621	0.791825	-0.0187886	0.00550306	143.276	0.70928	-0.0186672	0.0053591	98.7814	0.772513	0.0201882	0.00495698	209.281	0.728522	-0.0329765	0.00639472	15.0415	0.795203	-0.00803657	0.00656638
Gm08_16226313	48.9668	0.79184	-0.0131505	0.00524582	109.496	0.709288	-0.0162437	0.0058056	10.974	0.77254	0.00669207	0.0051122	124.809	0.728549	-0.0253017	0.00633603	4.89309	0.795206	-0.00455871	0.00652573
Gm08_16235534	7.11464	0.791851	-0.00584953	0.00535214	0.973134	0.709312	0.0018047	0.00549848	30.9085	0.772532	-0.013067	0.00471094	9.38607	0.728586	-0.00798701	0.00646609	281.874	0.795103	-0.0402664	0.00705263
Gm08_16245118	533.299	0.79171	0.0403809	0.00502927	87.9168	0.709294	0.013795	0.00586038	325.435	0.772452	-0.0334728	0.00472073	6.78851	0.728587	0.00525758	0.00595586	19.8393	0.795202	0.00844263	0.0063038
Gm08_16253517	115.245	0.791823	0.0186042	0.00483238	85.1233	0.709295	0.0134536	0.00567653	168.166	0.772496	-0.0238277	0.00451992	435.716	0.728466	0.0416582	0.00626849	18.8969	0.795203	0.00815956	0.00596901
Gm08_16262240	7.94385	0.791851	0.00524453	0.00449193	386.91	0.709226	0.0308184	0.00557563	170.923	0.772492	-0.0257354	0.00475853	2.23997	0.728589	-0.00317036	0.00565923	1.8069	0.795207	-0.00270382	0.0059135
Gm08_19162370	17.901	0.791851	-0.00429279	0.00462874	42.0722	0.709307	-0.00544851	0.00571236	1494.38	0.772296	-0.0423266	0.00502676	710.044	0.728464	0.033077	0.00573091	332.913	0.79515	0.0203763	0.00582011
Gm08_19189509	5.80103	0.791853	-0.00244262	0.00445752	100.181	0.7093	-0.00839856	0.00580893	1207.22	0.772344	-0.0380685	0.00572248	926.494	0.728426	0.0378852	0.00582174	355.122	0.795146	0.0210556	0.00569492
Gm08_19201072	0.804277	0.791854	0.000916799	0.00492015	31.1173	0.709308	-0.00471724	0.00536675	1165.49	0.772349	-0.0377154	0.00541743	1259.18	0.728365	0.0445537	0.00639403	499.826	0.795121	0.0251855	0.00588404
Gm08_19263953	57.2639	0.791847	-0.0056006	0.00512801	341.61	0.709282	0.0114561	0.00573052	140.9	0.772526	0.00931872	0.00577329	0.0940879	0.728589	-0.000263955	0.00650114	2373.33	0.794913	0.0390499	0.00590568
Gm08_19290766	371.554	0.791789	-0.0218683	0.0052112	17.9463	0.70931	-0.00391807	0.00534718	53.3306	0.772533	0.0091072	0.00502429	179.538	0.728552	-0.0196312	0.00583133	4.59781	0.795207	0.00272207	0.00605407
Gm08_19495908	513.774	0.791765	-0.0254803	0.00583404	0.724795	0.709312	0.000780018	0.00499275	120.092	0.772521	0.0135338	0.00511865	428.603	0.728501	-0.0299985	0.00621066	0.191112	0.795208	0.000549626	0.00583098
Gm08_19618680	526.173	0.791762	-0.0259982	0.00597449	45.3975	0.709306	-0.00622374	0.00508695	77.9037	0.772528	0.0109944	0.00507489	106.419	0.728567	-0.0150911	0.00565866	32.2939	0.795202	0.00720588	0.00555252
Gm08_19653675	256.873	0.791809	-0.0181125	0.00674995	36.5752	0.709307	-0.00556841	0.00487055	27.1358	0.772538	0.00646902	0.005005	121.348	0.728564	-0.016062	0.0055404	60.9491	0.795196	0.00986919	0.00523388
Gm08_19787004	418.224	0.791781	-0.0229378	0.00724517	13.1071	0.70931	0.00331168	0.0048718	26.3909	0.772538	0.00632559	0.00475482	0.000252218	0.728589	2.2913e-05	0.0058241	68.665	0.795195	0.0103876	0.00555441
Gm08_25159552	19483.6	0.790825	-0.0477507	0.0123493	97.2011	0.709308	0.00292881	0.00473812	1044.64	0.772487	-0.0115095	0.00551165	4873.05	0.728326	0.0265557	0.00618989	3777.91	0.794995	0.022389	0.00516344
Gm08_45678641	1605.7	0.791705	0.0240964	0.00907839	110.832	0.709304	0.00535046	0.00479673	129.406	0.77253	0.00733911	0.0048087	64.4991	0.728583	0.00586087	0.00538004	1414.84	0.795064	0.0247516	0.00528408
Gm08_45695835	1662.5	0.791698	0.0246827	0.008103	65.6182	0.709307	0.00413875	0.00489254	101.63	0.772533	0.00654957	0.00467394	1.42129	0.728589	0.000876769	0.00569317	1342.63	0.79507	0.0242801	0.00569275
Gm08_45765326	1931.44	0.791674	0.0264836	0.00715558	2.36561	0.709312	0.00078247	0.00460817	56.9196	0.772537	0.00487797	0.00487284	179.169	0.728571	0.00978998	0.0059658	1428.9	0.795062	0.024928	0.00613464
Gm09_135360	56.9833	0.791845	0.0071395	0.00613041	32.7505	0.709308	-0.00453018	0.00496644	41.6779	0.772537	-0.00645027	0.00459696	52.8958	0.728581	-0.00788235	0.00594337	5507.69	0.794338	-0.075687	0.00915205
Gm09_247235	12.7014	0.791851	0.00434232	0.00590066	349.072	0.709262	0.0188086	0.00502952	30.4505	0.772537	-0.0072395	0.00502335	263.395	0.728534	-0.0239041	0.00611838	41.9708	0.795199	-0.00866954	0.00668093
Gm09_344024	621.847	0.791706	-0.0384215	0.00593674	7.59708	0.709311	0.00344503	0.0048927	688.226	0.772367	0.0445788	0.00565297	219.432	0.728527	-0.0296392	0.00620568	45.8284	0.795196	-0.0117095	0.00680046
Gm09_346078	289.472	0.791783	-0.0270901	0.00558394	218.768	0.709272	0.0190367	0.00550132	163.516	0.772499	0.0225583	0.00501887	535.109	0.72843	-0.0484926	0.00607461	1.92744	0.795207	0.00249154	0.00672528
Gm09_366745	242.179	0.791794	-0.0248829	0.00529406	0.874317	0.709312	0.00120786	0.00525569	86.4996	0.77252	0.016484	0.00529235	553.836	0.728424	-0.0496074	0.00593033	43.9604	0.795196	0.0119536	0.00641676
Gm09_385786	51.8408	0.791841	-0.0116661	0.00510191	7.89217	0.709311	0.00367335	0.0054899	2.9158	0.772542	-0.00307055	0.00535373	432.772	0.728458	-0.0446124	0.00620453	21.7279	0.795202	0.00852505	0.00577893
Gm09_399841	510.633	0.791726	-0.0364962	0.00517558	15.8445	0.709309	-0.00518854	0.0053604	110.356	0.772513	0.0188312	0.00512513	588.946	0.728411	-0.0518815	0.00618216	230.67	0.795143	0.0276892	0.00604023
Gm09_399940	74.4361	0.791835	-0.0141009	0.00491415	7.98079	0.709311	0.00372304	0.00554213	21.8105	0.772537	0.0084825	0.00508168	520.947	0.728429	-0.049587	0.00652695	92.103	0.795182	0.0177261	0.0058679
Gm09_422384	95.5743	0.79183	-0.0160507	0.00529982	32.9377	0.709306	-0.00760832	0.00538395	12.0991	0.77254	0.00634958	0.00525069	409.559	0.728462	-0.0442367	0.00631935	146.491	0.795166	0.0224661	0.00555645
Gm09_422720	72.6539	0.791835	-0.0140169	0.00500845	11.2305	0.70931	-0.00444901	0.00548009	11.4437	0.77254	0.00618642	0.00482195	381.413	0.728471	-0.0427865	0.00650917	164.955	0.79516	0.0238826	0.00593864
Gm09_424439	279.538	0.791786	-0.0263096	0.00542753	2.29693	0.709312	0.00193209	0.00538571	38.4316	0.772533	0.010794	0.00477239	175.904	0.728538	-0.0273673	0.0069681	95.9515	0.795182	0.0173516	0.00594929
Gm09_425375	56.4393	0.791839	-0.0122892	0.00507796	62.6019	0.7093	-0.0104549	0.00525656	4.58675	0.772542	0.00389301	0.00467618	637.731	0.728393	-0.0548966	0.00814306	160.216	0.795162	0.0233971	0.00639245
Gm09_425581	81.8232	0.791833	-0.014825	0.00522553	39.3817	0.709305	-0.00830647	0.00570886	10.0548	0.77254	0.00577629	0.00509301	525.542	0.728427	-0.0499673	0.00894129	137.073	0.795169	0.0216874	0.00646323
Gm09_1578981	2.50928	0.791853	0.00488733	0.00537945	234.685	0.709229	0.038441	0.00582029	26.3095	0.77253	-0.0172168	0.00489296	325.895	0.728411	0.0694321	0.00954074	442.234	0.794973	0.0719102	0.00661283
Gm09_1580859	33.422	0.791838	0.0176651	0.00516792	292.325	0.709209	0.0425262	0.00565005	72.7034	0.772507	-0.0283142	0.00500022	258.201	0.72845	0.0610172	0.00800522	695.145	0.794843	0.0891909	0.00666249
Gm09_1607104	45.7123	0.791832	0.0203924	0.00480301	369.15	0.709183	0.0472269	0.00592206	35.2557	0.772526	-0.0194293	0.00484566	337.086	0.728411	0.0684415	0.00757072	447.007	0.794977	0.0705003	0.00633519
Gm09_1614124	98.4586	0.791809	-0.0289089	0.00494836	382.028	0.709183	0.0465415	0.00557893	19.9279	0.772533	0.0140732	0.00482263	153.819	0.728511	0.0443165	0.00691709	395.452	0.795011	0.0639033	0.00639135
Gm09_1631473	26.6822	0.791841	-0.0160295	0.00493026	175.618	0.709249	0.0334696	0.00572664	30.5103	0.772527	0.0186291	0.00479123	57.1163	0.728558	0.0291398	0.00624732	307.494	0.795044	0.0602618	0.00636824
Gm09_1634692	33.0344	0.791838	0.0182351	0.00487169	337.389	0.709189	0.0472751	0.0055512	11.4559	0.772537	-0.0117228	0.004806	333.056	0.7284	0.0729272	0.00601358	341.764	0.795021	0.0652121	0.00635002
Gm09_1635593	11.6419	0.791848	0.0105353	0.00518081	233.51	0.709229	0.0383575	0.00530566	0.000219795	0.772543	-4.98348e-05	0.00465825	163.853	0.7285	0.049369	0.00603091	239.621	0.795081	0.0530128	0.00606502
Gm09_1658652	48.1218	0.791829	-0.0228035	0.0053599	263.022	0.709213	0.0431331	0.00540255	2.36529	0.772542	0.00553607	0.00486009	317.935	0.728401	0.0744848	0.00609465	304.302	0.795035	0.0639354	0.00608851
Gm09_1661409	57.0963	0.791825	-0.0248847	0.00540616	197.017	0.709238	0.0373945	0.00557493	10.8289	0.772537	0.0118704	0.00509207	256.632	0.728437	0.0671002	0.00610479	194.831	0.795097	0.0512693	0.00652397
Gm09_1665753	71.1009	0.791817	-0.0278518	0.00533347	217.953	0.70923	0.0394351	0.00559424	15.3969	0.772534	0.0142018	0.00501976	235.776	0.728449	0.0645824	0.00623447	190.915	0.795099	0.0509198	0.00677709
Gm09_1687866	87.2407	0.79181	-0.0305776	0.00503177	209.31	0.709233	0.0383573	0.00585808	5.15227	0.77254	0.00812795	0.00521082	315.698	0.728404	0.0736299	0.00641003	595.202	0.794872	0.0889418	0.00689501
Gm09_1690578	196.59	0.791753	-0.0463856	0.00552794	255.432	0.709215	0.0427904	0.00568276	79.5744	0.772499	0.0323086	0.00551413	206.782	0.728466	0.0603885	0.00608973	365.769	0.794999	0.0705313	0.00640047
Gm09_1706677	6.20166	0.791851	-0.00837257	0.00525573	189.741	0.709239	0.0374136	0.00554037	0.904854	0.772542	0.00350823	0.00551285	64.8004	0.72855	0.034574	0.00609697	395.577	0.794978	0.074669	0.00654268
Gm09_1707351	68.4886	0.791818	-0.0277631	0.0053578	76.7508	0.709283	0.0237569	0.00560026	22.4807	0.77253	0.0174387	0.00550248	92.7498	0.728533	0.0411966	0.00610109	443.862	0.79495	0.0788813	0.00681628
Gm09_1713665	80.9324	0.791812	-0.0300355	0.00511396	282.417	0.709204	0.0454179	0.0056228	54.4942	0.772513	0.0269679	0.00536756	291.979	0.728414	0.0722561	0.00605831	572.909	0.794878	0.0890253	0.00656504
Gm09_1716099	5.17469	0.791851	-0.00781724	0.00519808	277.343	0.709203	0.046206	0.00565177	5.30587	0.77254	0.00868838	0.00528123	120.825	0.728514	0.048303	0.00612186	413.295	0.794962	0.0780528	0.00676653
Gm09_1718381	3.08926	0.791852	-0.00599057	0.00512545	345.295	0.709177	0.0511681	0.00572412	12.5607	0.772536	0.0132454	0.00575435	101.807	0.728526	0.0438456	0.00638413	401.044	0.794971	0.0761904	0.00683343
Gm09_1728138	0.751794	0.791853	-0.00293519	0.00537464	195.539	0.709236	0.0383053	0.00620117	1.03589	0.772542	-0.00377099	0.00574973	105.847	0.728525	0.0441333	0.00651871	467.903	0.794934	0.0815981	0.00678285
Gm09_1730346	2.56837	0.791852	-0.00548084	0.00531386	192.059	0.709237	0.0383346	0.00607625	0.640909	0.772543	0.00299816	0.00663252	141.115	0.728502	0.0515452	0.00662844	482.528	0.794923	0.083752	0.0069594
Gm09_1757564	933.236	0.791495	-0.0760888	0.0057767	1886.29	0.70876	0.0897445	0.0059373	1290.07	0.772029	0.0950469	0.00666738	107.155	0.728545	-0.0300174	0.00688305	486.114	0.795004	0.0596124	0.00672607
Gm09_1764043	587.125	0.791638	-0.0575778	0.00542709	2125.65	0.708716	0.0911518	0.00647948	809.787	0.772236	0.0715887	0.00627986	53.0683	0.728569	-0.0199467	0.00633975	468.548	0.795021	0.0556431	0.00666301
Gm09_1764258	905.889	0.791512	-0.0734977	0.00620835	1985.78	0.708741	0.0903934	0.00607804	1098.11	0.772114	0.0858495	0.00742478	4.11028	0.728588	-0.00573936	0.00599251	230.247	0.795113	0.0401719	0.00698627
Gm09_1769811	1129.2	0.791433	-0.0810383	0.00652062	1862.98	0.708782	0.0865801	0.00606946	806.317	0.772232	0.0725963	0.00741702	4.28852	0.728588	-0.00577271	0.00592377	609.575	0.794961	0.0644878	0.00754768
Gm09_1771917	3.85344	0.791852	-0.00709894	0.00629212	1.24749	0.709312	0.00325722	0.0059756	66.8388	0.772503	-0.0323418	0.00793994	3.67704	0.728587	0.00873875	0.00598446	187.965	0.795091	-0.0552393	0.00723435
Gm09_1778407	89.2003	0.791803	0.0345896	0.00616715	39.3871	0.709296	0.0185518	0.00563067	123.654	0.772468	-0.044681	0.00705486	2.57831	0.728588	-0.00748082	0.00622246	273.356	0.795035	-0.0676405	0.00709369
Gm09_1780524	25.6587	0.791839	0.0186211	0.00570785	17.4079	0.709305	-0.0123762	0.00581166	26.5593	0.772527	-0.0207969	0.00637401	1.57056	0.728588	-0.00586929	0.00587745	341.584	0.79499	-0.0759248	0.00673863
Gm09_1782384	175.122	0.791752	0.0499002	0.00548212	34.2283	0.709297	-0.0177462	0.00559221	112.96	0.772472	-0.0441543	0.00615555	30.471	0.728568	0.0268132	0.00605199	417.241	0.794934	-0.086357	0.00700462
Gm09_1784421	466.307	0.7916	0.0759933	0.00532336	184.676	0.709238	-0.0386584	0.00593044	355.587	0.772336	-0.072665	0.0060815	389.249	0.728343	0.0878341	0.00665606	239.664	0.795062	-0.0607639	0.00690833
Gm09_1784874	202.471	0.791735	0.0539743	0.00539607	6.52894	0.709309	-0.00777845	0.00565664	285.515	0.772363	-0.0708231	0.00580551	84.2433	0.72853	0.0453045	0.00647342	138.778	0.795116	-0.0502505	0.00681261
Gm09_1789479	838.587	0.791367	0.108772	0.00512178	126.295	0.709258	-0.033851	0.00562464	755.606	0.77207	-0.114254	0.0057523	4.78834	0.728586	-0.0107564	0.00606856	122.736	0.795127	0.0468744	0.00741663
Gm09_1790294	379.127	0.791633	0.0732929	0.00543315	21.8263	0.709303	-0.0140996	0.00561657	274.687	0.77237	-0.0690378	0.00605036	5.90397	0.728585	0.0119629	0.00622095	3.75055	0.795206	0.00820953	0.00646352
Gm09_1791289	562.806	0.791536	0.0866111	0.00574176	56.2738	0.709289	-0.0220303	0.00540906	435.068	0.772279	-0.0839385	0.0058399	15.154	0.728579	0.0183698	0.00596625	7.53977	0.795203	0.0112507	0.0063105
Gm09_1793277	743.003	0.791429	0.101038	0.00575629	92.9288	0.709273	-0.0286873	0.00542152	392.693	0.772301	-0.0811659	0.00601027	54.8601	0.728552	0.0357383	0.00609469	46.7954	0.795178	0.0285197	0.00615602
Gm09_1793370	618.127	0.79149	0.0948518	0.00547034	130.274	0.709256	-0.0348677	0.00548918	357.313	0.772315	-0.0799448	0.00562584	19.7222	0.728575	-0.0222766	0.00599301	11.8973	0.7952	0.014844	0.00606462
Gm09_1800710	92.6576	0.791799	0.0367873	0.00533063	51.2367	0.70929	-0.0218824	0.00534866	138.749	0.772454	-0.0499381	0.00553004	1.2962	0.728588	-0.00573748	0.00611976	8.81597	0.795202	-0.0128055	0.00608274
Gm09_1801934	197.874	0.791737	0.0538941	0.00507769	46.0483	0.709292	-0.0207864	0.00547271	67.7225	0.772499	-0.0350038	0.0054311	17.6297	0.728577	-0.0212576	0.00562669	20.0798	0.795195	-0.0193872	0.00665938
Gm09_1802137	342.797	0.791651	0.0710798	0.00539243	92.1703	0.709272	-0.0294627	0.00571442	184.256	0.772425	-0.0578796	0.00528962	27.298	0.72857	-0.0265435	0.00594158	9.62697	0.795202	-0.0134578	0.00641213
Gm09_1802205	163.456	0.791757	0.0488837	0.00538352	31.8494	0.709298	-0.017258	0.00547015	112.718	0.772471	-0.0450479	0.00546798	10.163	0.728582	-0.0160874	0.00568906	15.1432	0.795198	-0.016796	0.0064115
Gm09_1802333	170.828	0.791752	0.0502486	0.00526194	96.3346	0.70927	-0.030174	0.00581871	64.8703	0.772501	-0.0343698	0.00522452	91.5023	0.728523	-0.0485524	0.00562432	25.1352	0.795191	-0.0217615	0.00644121
Gm09_1803566	232.866	0.791721	0.0564735	0.00525886	9.012	0.709308	-0.00891477	0.0051467	129.871	0.772463	-0.0466091	0.00558169	10.6192	0.728582	-0.0157121	0.00574087	29.2726	0.795189	-0.0225186	0.00633672
Gm09_1804552	282.643	0.791687	0.0642401	0.00494431	21.4401	0.709303	-0.0141548	0.00555242	233.132	0.772394	-0.0647248	0.00543475	10.7224	0.728582	-0.0165002	0.00584966	0.00168472	0.795208	0.000177017	0.00600748
Gm09_1805242	236.524	0.791714	0.0589849	0.00505396	35.5386	0.709297	-0.0182799	0.00531113	223.173	0.7724	-0.0636071	0.00547571	17.0315	0.728577	-0.0209181	0.00603657	4.72856	0.795205	-0.00941882	0.00618333
Gm09_1805322	187.74	0.791748	0.0498355	0.00501263	33.8407	0.709298	-0.0170675	0.00511929	364.254	0.772323	-0.0765056	0.00570101	5.91196	0.728585	0.0114353	0.00568724	15.133	0.795198	0.0158759	0.00614283
Gm09_1805996	166.922	0.791756	0.049218	0.00510161	91.7727	0.709272	-0.0292098	0.00537172	129.477	0.77246	-0.0480513	0.00558292	80.6952	0.728532	-0.0450109	0.00582046	0.394946	0.795208	-0.00269995	0.00601268
Gm09_1806115	119.882	0.791784	0.0414228	0.00529788	13.7791	0.709306	-0.0112482	0.00552652	180.908	0.772429	-0.0563568	0.00540384	28.5941	0.728569	-0.0265436	0.00575807	12.2153	0.7952	0.0149003	0.00593524
Gm09_1807173	266.882	0.791705	0.0588406	0.00541874	8.54539	0.709309	-0.00846985	0.00545497	275.976	0.772378	-0.0659082	0.00593431	1.5058	0.728588	0.00570364	0.00610296	11.2153	0.795201	-0.0135267	0.00588983
Gm09_1807401	281.397	0.79169	0.063241	0.00504698	26.7378	0.709301	-0.0156202	0.00539792	236.292	0.772394	-0.0641705	0.00576171	71.508	0.728539	-0.0418001	0.00580838	13.0565	0.795199	0.015349	0.00646916
Gm09_1807603	141.531	0.791772	0.0447095	0.00509129	118.755	0.709261	-0.0328159	0.00565443	155.029	0.772446	-0.0518008	0.00558058	0.000661985	0.728589	0.000126686	0.00607056	4.05962	0.795205	-0.00852926	0.00625038
Gm09_1808317	157.478	0.791762	0.0470876	0.00467015	88.8767	0.709274	-0.0283491	0.00546948	195.341	0.772421	-0.0580415	0.00565528	0.355885	0.728589	-0.00293076	0.0061065	6.88306	0.795203	-0.0110865	0.00642723
Gm09_1808425	169.357	0.791758	0.0478349	0.00466528	21.7173	0.709303	-0.0137602	0.00636031	215.335	0.772411	-0.0595269	0.00547307	12.0882	0.728581	0.0165874	0.00607057	0.549139	0.795208	-0.00305975	0.00660788
Gm09_5024264	2891.3	0.79161	0.0293807	0.00503661	68.2008	0.709308	-0.00389337	0.00613049	7560.76	0.771904	-0.0488267	0.00708592	135.677	0.728578	0.00683074	0.00620394	460.103	0.795167	-0.0123462	0.00713757
Gm09_7163703	341.499	0.791827	0.00942767	0.00490441	194.66	0.7093	0.0062854	0.00605992	2090.47	0.772376	-0.0242519	0.00638736	3565.9	0.728304	0.0337317	0.00794137	800.576	0.795141	0.0153573	0.0058044
Gm09_9016239	1609.44	0.791738	0.0186882	0.00590508	12895.9	0.708579	-0.0455638	0.00843768	3132.68	0.772314	-0.0271446	0.00678993	3069.31	0.728364	0.0287015	0.0076789	111.132	0.795199	0.00523175	0.00561856
Gm09_9870340	2.41899	0.791853	-0.00178952	0.005275	5053.42	0.708622	-0.0684396	0.00661273	230.09	0.7725	0.0186284	0.00721166	1558.47	0.728289	-0.0537062	0.00747109	874.034	0.795038	-0.0370568	0.0068635
Gm09_10135674	440.144	0.791757	-0.0298041	0.00585642	694.205	0.709196	-0.0309781	0.00602149	545.643	0.772416	0.0360433	0.00718976	178.265	0.728544	-0.0236309	0.00665164	603.467	0.795061	0.0386288	0.00588675
Gm09_10379445	374.994	0.791771	-0.0275813	0.00552536	1034.05	0.709139	-0.0378968	0.00637477	649.732	0.772391	0.0394385	0.00687534	321.373	0.728508	-0.0318246	0.00620002	618.597	0.795057	0.0392172	0.00634766
Gm09_10474861	243.384	0.7918	-0.0221866	0.00576126	976.228	0.709149	-0.036787	0.0056907	446.803	0.772439	0.0326387	0.0059392	97.6642	0.728565	-0.0174883	0.00633215	1268.76	0.794898	0.0560394	0.00666162
Gm09_10979308	45.899	0.791844	-0.00954475	0.00583557	495.572	0.709229	-0.0262039	0.00515186	72.2919	0.772526	0.0129701	0.00594771	1321.33	0.728264	-0.0631263	0.00657422	743.372	0.795029	0.042391	0.00660854
Gm09_11842723	517.415	0.791737	-0.0332512	0.00555307	397.812	0.709244	-0.0241171	0.00505084	739.496	0.772366	0.0431849	0.00580719	183.208	0.728542	-0.0246362	0.00640352	640.985	0.795047	0.0409752	0.00650435
Gm09_12863251	140.285	0.791822	0.0173032	0.00591945	7.34178	0.709311	-0.00325269	0.00505181	23.6965	0.772537	0.00773755	0.00556217	5.47973	0.728588	0.00426776	0.00616128	538.659	0.795073	-0.0375859	0.00711031
Gm09_15999074	15.4027	0.79185	0.00580593	0.00519643	55.5639	0.709303	-0.00904649	0.00513068	201.597	0.772494	0.0228904	0.00536144	335.825	0.728501	-0.0340056	0.00606597	756.955	0.795015	-0.045183	0.00727262
Gm09_18140886	2.2803	0.791853	-0.00220129	0.00525964	36.8569	0.709306	-0.00727404	0.00495369	124.829	0.772513	0.017731	0.00541844	134.823	0.728554	-0.0211743	0.005975	201.318	0.795158	-0.0229432	0.00642182
Gm09_18975401	18.1611	0.79185	-0.00619151	0.00481252	2.83547	0.709312	0.00201432	0.00501839	136.073	0.77251	0.0184312	0.00558735	49.2966	0.728577	-0.0127194	0.00586745	98.1956	0.795183	-0.0159556	0.00650065
Gm09_19396262	250.972	0.791798	0.0228614	0.00482236	226.82	0.709274	0.0179186	0.00526334	0.577032	0.772543	-0.00119028	0.00532282	110.914	0.728561	-0.0188518	0.00554577	87.9884	0.795186	0.0149801	0.00693936
Gm09_20463510	0.421805	0.791854	0.000875364	0.0051122	367.627	0.709254	0.0215433	0.00514557	107.344	0.772519	0.0150162	0.00553493	1.76749	0.728589	0.00215821	0.00576069	67.8111	0.795192	-0.0121757	0.00637672
Gm09_31130602	31.4635	0.791848	-0.00649611	0.0046693	149.563	0.709292	0.0118433	0.00517786	43.7968	0.772535	0.00822376	0.0051272	469.025	0.728497	0.0301528	0.00566706	1461.97	0.794921	-0.0484609	0.00667127
Gm09_31168892	61.4889	0.791843	-0.00908514	0.00474025	180.048	0.709287	0.0129998	0.00545223	95.6239	0.772525	0.0121573	0.00474144	326.638	0.728525	0.0251793	0.00585164	1586.32	0.794896	-0.0505025	0.00657274
Gm09_32881587	3.49924	0.791853	0.00221913	0.00480115	56.009	0.709304	0.00740858	0.00545543	77.6943	0.772528	-0.0112608	0.00489357	135.553	0.728561	0.0167948	0.00566655	150.115	0.795178	-0.0159642	0.00627405
Gm09_32927873	9.31355	0.791852	-0.00407647	0.00512877	207.652	0.709279	0.0160765	0.00556676	0.431007	0.772543	0.000949039	0.00533029	619.519	0.728444	0.0409991	0.00611875	163.748	0.795171	-0.0188573	0.00570187
Gm09_33131097	10.0896	0.791852	-0.00425645	0.00520089	79.4943	0.7093	0.00996771	0.00560849	2.43279	0.772542	0.00226372	0.00468257	507.824	0.72847	0.0372931	0.00669395	159.677	0.795171	-0.0186942	0.00573241
Gm09_33201929	0.900068	0.791854	-0.00124605	0.00496627	78.902	0.7093	-0.00976954	0.00541643	40.2996	0.772534	0.00900714	0.00498101	1390.91	0.728271	0.0600921	0.00753617	62.8843	0.795194	-0.0114721	0.00604459
Gm09_33748460	19.9526	0.79185	-0.0058987	0.00493618	6.34987	0.709311	-0.00278851	0.00550122	109.245	0.772519	0.0149055	0.00505357	1323.55	0.728286	0.058873	0.00721356	236.501	0.795155	-0.0223615	0.00691161
Gm09_34267448	1646.65	0.791615	-0.038088	0.00580558	14.8691	0.70931	-0.00319885	0.00607418	389.977	0.772485	0.0194981	0.00543981	379.642	0.728532	-0.0207904	0.00747695	7.55465	0.795207	0.00277419	0.0060908
Gm09_34958952	384.474	0.791803	-0.0166363	0.00499656	496.06	0.70926	-0.0166391	0.00630445	242.742	0.77251	0.0138309	0.00500484	2393.11	0.728267	-0.046504	0.00706855	205.696	0.795179	-0.0130203	0.00662802
Gm09_36305377	1297.14	0.791721	-0.0238726	0.00494488	4379.14	0.708953	0.03825	0.00706593	1107.82	0.772428	0.0229386	0.00489026	2093.26	0.728372	-0.0335364	0.00637905	2458.89	0.794939	0.0349597	0.00778948
Gm09_36517311	4420.88	0.791419	-0.0423451	0.00567058	860.587	0.709244	0.0163577	0.00646638	656.138	0.772478	0.0169349	0.0045053	2382.91	0.728352	-0.0342221	0.00575529	1941.18	0.795004	0.0298036	0.00632599
Gm09_39615772	0.063282	0.791854	0.000267147	0.00490815	10426.4	0.707955	0.0938622	0.00731801	131.185	0.772521	-0.0124041	0.00494717	1791.45	0.728308	-0.0468047	0.00594513	136.814	0.795184	0.0129855	0.00697346
Gm09_39747480	472.988	0.791745	0.0323736	0.00542756	2326.63	0.70889	0.061758	0.00653656	41.1707	0.772533	0.00983158	0.00428417	28.2357	0.728583	-0.00842961	0.00603989	135.68	0.795175	0.018281	0.00606379
Gm09_39784505	434.227	0.791784	-0.0215773	0.00524783	19.4284	0.70931	-0.00395539	0.00684834	726.358	0.772426	0.0288747	0.00459742	546.76	0.728502	-0.0264097	0.00611833	1261	0.794994	0.0389404	0.00662737
Gm09_39785445	237.153	0.791815	-0.016129	0.00532156	19.3435	0.70931	-0.00397616	0.00651673	525.731	0.772457	0.024849	0.00453149	434.419	0.728519	-0.023813	0.00583951	1113.07	0.795017	0.0370069	0.00775867
Gm09_40038388	84.7311	0.791798	0.0390998	0.00543352	132.394	0.709248	0.0395943	0.00572279	62.8196	0.772499	-0.0367022	0.00510434	248.942	0.728402	0.0836027	0.00625428	0.087862	0.795208	-0.00139866	0.00710304
Gm09_40038961	63.0629	0.79181	0.0355008	0.00498557	227.409	0.709196	0.0543651	0.0062106	78.4934	0.772485	-0.0434073	0.0047901	167.497	0.728455	0.0733206	0.00599082	5.81385	0.795204	-0.0120319	0.00718817
Gm09_40041912	72.6496	0.791804	0.0378305	0.00500819	204.267	0.709208	0.0511894	0.00534939	86.0622	0.77248	-0.0450893	0.00476475	159.661	0.728462	0.0709025	0.00585649	0.215117	0.795208	-0.00229614	0.00663231
Gm09_40042325	51.5431	0.791818	0.0319054	0.00506124	239.067	0.709191	0.0554533	0.00546235	43.9672	0.772511	-0.032263	0.0052845	105.05	0.728506	0.0575365	0.00595535	1.45722	0.795207	-0.00598259	0.00631613
Gm09_40042467	38.0028	0.791828	0.0272339	0.00518504	283.411	0.709169	0.0600772	0.00520214	32.9614	0.772519	-0.0277341	0.00510534	169.546	0.728456	0.0723717	0.00606629	0.0383703	0.795208	-0.000963929	0.00620413
Gm09_40043531	73.112	0.791803	0.038346	0.00511956	225.334	0.709197	0.0542811	0.0052484	82.4413	0.772482	-0.044633	0.00516481	171.534	0.728451	0.0744608	0.00605706	4.57063	0.795204	-0.0107034	0.00580748
Gm09_40045855	460.649	0.79157	0.0857269	0.00501889	104.54	0.709264	0.0334672	0.005524	399.105	0.772283	-0.0864447	0.00533376	258.644	0.72841	0.0786606	0.00677402	9.04749	0.795202	-0.0132742	0.00574507
Gm09_40047769	265.572	0.791671	0.0726235	0.0050735	334.366	0.709142	0.0657443	0.00514232	104.398	0.772466	-0.049887	0.00540063	68.8051	0.728534	0.0467879	0.00605504	29.3565	0.795185	-0.0269445	0.00579902
Gm09_40049672	275.595	0.791677	0.0688602	0.00517273	88.5611	0.70927	0.0318292	0.00546355	64.4731	0.772499	-0.0362012	0.00504104	0.161638	0.728589	-0.00206128	0.00619617	55.0278	0.795169	-0.0340882	0.00578008
Gm09_40050415	267.446	0.791671	0.0722789	0.00490782	71.2454	0.709276	0.0301285	0.00523609	59.2364	0.7725	-0.0372246	0.00501312	36.594	0.72856	0.0337026	0.00593279	33.3763	0.795183	-0.0284619	0.00607855
Gm09_40051254	234.075	0.791698	0.0660315	0.00514241	5.84825	0.709309	0.00844258	0.00533979	70.0956	0.772493	-0.0394705	0.00492976	181.807	0.72845	0.0730089	0.00589251	8.55871	0.795202	-0.0140515	0.00597834
Gm09_40051329	130.692	0.791773	0.0457847	0.00493459	5.68033	0.709309	0.00785943	0.00545758	64.393	0.772501	-0.0347913	0.00469705	378.875	0.728326	0.0951823	0.0059729	37.1431	0.795183	-0.0269426	0.0060786
Gm09_40052572	40.785	0.791825	0.0288882	0.00493911	57.1225	0.709283	0.0275729	0.00546183	1.37579	0.772542	-0.00581395	0.00466012	197.948	0.728429	0.0805287	0.00566978	25.6402	0.795188	-0.0255615	0.00577779
Gm09_40054524	24.3683	0.791836	0.0228742	0.00478432	33.59	0.709294	0.0216017	0.00541937	11.2204	0.772534	-0.0170587	0.0048046	230.862	0.728396	0.089883	0.00597936	10.4215	0.7952	-0.0167387	0.00557454
Gm09_40054657	34.7393	0.791829	0.0274126	0.00500755	33.654	0.709294	0.0216936	0.00525099	21.2376	0.772527	-0.0235688	0.00484296	258.206	0.728371	0.0955647	0.00584723	9.19159	0.795201	-0.0157862	0.00557897
Gm09_40056609	0.733529	0.791853	0.0038895	0.00524466	6.38517	0.709309	0.00925251	0.00523759	41.0075	0.772512	-0.0318656	0.00481825	381.291	0.728279	0.112152	0.00600256	39.4834	0.795177	-0.0318448	0.00545892
Gm09_40056852	9.74461	0.791847	0.0141947	0.00508237	0.218724	0.709312	0.00171416	0.00551459	47.3918	0.772507	-0.0343149	0.0045809	190.617	0.728433	0.0795241	0.0060015	23.7894	0.795189	-0.0247603	0.00565449
Gm09_40061836	106.77	0.791775	-0.0493528	0.00518293	1.45524	0.709311	0.00463801	0.00516725	21.5226	0.772526	0.0243206	0.0049632	202.711	0.728415	0.0862092	0.00597855	8.03416	0.795201	-0.0151319	0.00590868
Gm09_40062740	40.8237	0.791823	-0.0310148	0.00493661	27.5006	0.709297	0.0204314	0.00524399	4.85398	0.772539	0.011778	0.00489361	484.998	0.728162	0.136936	0.006174	11.9832	0.795198	0.0188387	0.00609178
Gm09_40063847	15.8289	0.791842	-0.0198827	0.00500372	0.03647	0.709312	0.000764284	0.0055467	0.386149	0.772543	0.00342889	0.0049002	279.118	0.728334	0.107776	0.00635021	0.0488102	0.795208	-0.00124071	0.00595462
Gm09_40063919	17.9167	0.79184	-0.0213066	0.00512334	0.013171	0.709312	-0.000462257	0.00537197	0.506404	0.772542	0.00395921	0.00463714	326.968	0.728287	0.117855	0.00613347	0.0456672	0.795208	0.00120993	0.00571067
Gm09_40065780	15.9908	0.791842	-0.019694	0.00485348	2.55653	0.709311	-0.00631366	0.00547905	7.43468	0.772537	0.0148031	0.00484389	115.055	0.728486	0.067865	0.00664346	20.8244	0.79519	0.025218	0.00544598
Gm09_40069064	8.20442	0.791847	-0.0144543	0.00470449	3.31245	0.70931	0.00733892	0.00550645	3.80354	0.77254	-0.0108811	0.00485501	400.402	0.728218	0.130855	0.00672495	0.130149	0.795208	0.00204825	0.00566469
Gm09_40069273	9.09201	0.791847	-0.0151694	0.00508987	0.374893	0.709312	0.0024615	0.00509233	1.85743	0.772541	0.00758026	0.00477842	279.899	0.72833	0.109085	0.00620033	2.66361	0.795206	-0.00923734	0.0052614
Gm09_40069603	9.09201	0.791847	-0.0151694	0.00508751	0.374893	0.709312	0.0024615	0.00539063	1.85743	0.772541	0.00758026	0.0047187	279.899	0.72833	0.109085	0.00645871	2.66361	0.795206	-0.00923734	0.00561354
Gm09_40069671	1.67973	0.791852	-0.00646708	0.00526912	14.3554	0.709304	0.0151178	0.00525676	0.128342	0.772543	-0.00197465	0.00476724	331.639	0.728286	0.117467	0.00629728	0.00916744	0.795208	-0.000537094	0.0056418
Gm09_40076300	24.3114	0.791837	-0.0218624	0.00566864	165.414	0.709228	-0.0462652	0.00536165	0.636152	0.772542	-0.00385393	0.00484777	0.222313	0.728589	-0.00259526	0.00598354	0.115256	0.795208	-0.00167163	0.00547153
Gm09_40076975	2.3233	0.791852	-0.00762531	0.0052346	66.3213	0.709275	-0.0325644	0.00533775	1.14844	0.772542	-0.00592171	0.0048292	0.0924168	0.728589	-0.00196495	0.00643493	11.1746	0.795198	-0.0187988	0.00544505
Gm09_40077099	51.3378	0.791815	-0.0350865	0.00514211	163.215	0.709221	-0.0500572	0.00536079	0.0523714	0.772543	0.00123635	0.0048402	3.39156	0.728586	-0.0116151	0.00621364	1.6722	0.795207	-0.00711067	0.00563773
Gm09_40077223	11.1381	0.791845	-0.0166161	0.00514507	275.725	0.709157	-0.0660454	0.00549602	0.447571	0.772543	0.00368065	0.00487524	64.274	0.72853	-0.051645	0.00592657	1.1844	0.795207	-0.00609326	0.00577331
Gm09_40077381	0.0513326	0.791854	0.00105907	0.00528017	186.77	0.709212	-0.0516019	0.00570654	1.615	0.772542	-0.00651306	0.00506225	373.421	0.728277	-0.114095	0.0062132	2.00491	0.795206	0.0073906	0.00613923
Gm09_40078893	42.7946	0.791822	-0.0315198	0.00480394	216.205	0.709194	-0.0567676	0.00551473	7.17644	0.772537	0.0142156	0.00502859	205.289	0.72841	-0.0884392	0.00584915	24.8842	0.795187	0.026947	0.00594845
Gm09_40079333	17.0938	0.791841	-0.0196673	0.00505418	255.423	0.709174	-0.0610032	0.00569095	2.0804	0.772541	-0.00754295	0.0048261	113.767	0.728491	-0.0646585	0.00571924	63.8773	0.795155	0.0425533	0.00602867
Gm09_40084116	42.8264	0.791823	-0.0301819	0.00467131	20.2584	0.709301	-0.0167032	0.00547834	0.0143728	0.772543	-0.000606052	0.00470742	248.977	0.728384	-0.0919094	0.005874	53.4338	0.795165	0.0376329	0.0058306
Gm09_40089764	47.3931	0.791818	-0.03348	0.00491509	314.157	0.709139	-0.0689833	0.00562583	17.4914	0.772529	0.0224334	0.00500221	124.654	0.728479	-0.0698763	0.00593912	6.04901	0.795203	-0.013428	0.00574166
Gm09_40092428	31.7139	0.791831	-0.0263716	0.0048016	160.62	0.709226	-0.0477714	0.00550333	10.6782	0.772535	0.0168036	0.0051081	0.0717407	0.728589	0.00159359	0.00588039	15.8605	0.795195	0.0208531	0.0059534
Gm09_40097214	3.13867	0.791851	0.00822854	0.00496433	150.902	0.709232	-0.0458428	0.00553706	1.19591	0.772542	-0.00557781	0.00516899	180.309	0.728438	0.0793093	0.0061584	1.89307	0.795206	0.00714582	0.00609079
Gm09_40099094	4.77061	0.79185	-0.0101846	0.00528813	226.173	0.709192	-0.0562684	0.00555146	4.12713	0.77254	0.0104185	0.00505255	11.3152	0.72858	-0.0200464	0.00596286	35.0892	0.79518	-0.0309275	0.00608281
Gm09_40100785	49.1269	0.791823	-0.0286893	0.00512611	7.82599	0.709308	-0.00930423	0.00526571	7.57839	0.772538	-0.0122142	0.00505598	294.172	0.72838	0.0859506	0.00616773	43.2898	0.795178	-0.0297608	0.0062809
Gm09_40101858	26.8061	0.791835	-0.0230856	0.00516171	86.4581	0.709268	-0.0334096	0.0053401	43.0552	0.772511	0.0320208	0.00519732	89.7948	0.728518	-0.0532213	0.00589182	4.8011	0.795204	-0.0108917	0.00558987
Gm09_40102626	4.59421	0.79185	-0.0100189	0.00501055	169.639	0.709222	-0.0488309	0.00524851	12.9883	0.772533	0.0185366	0.00509288	2.56299	0.728587	-0.00957895	0.00615757	8.75549	0.795201	-0.015494	0.00593209
Gm09_40102780	0.0232121	0.791854	0.00072355	0.00478847	92.3828	0.709262	-0.0365656	0.00558427	4.0195	0.77254	-0.0104935	0.00505947	0.0826797	0.728589	0.0017563	0.00603143	21.5569	0.79519	-0.0247355	0.00567416
Gm09_40103375	21.4103	0.791838	-0.0220083	0.00494414	49.4686	0.709285	-0.0267964	0.00551814	15.5803	0.772531	0.0206959	0.00511521	9.82224	0.728581	0.0191874	0.00612653	64.101	0.795155	-0.0427267	0.00583952
Gm09_40103554	24.7903	0.791835	-0.023736	0.00495249	34.9322	0.709293	-0.022564	0.00563053	15.1642	0.772531	0.0204698	0.00488908	11.7466	0.728579	0.0210471	0.00611924	51.2177	0.795166	-0.0382895	0.00571081
Gm09_40105073	9.82834	0.791847	-0.0145578	0.00517633	186.623	0.709213	-0.0509467	0.00530303	2.57267	0.772541	0.00818382	0.00518753	44.9231	0.728551	0.0396683	0.006003	42.0896	0.795174	-0.0337026	0.005895
Gm09_40105504	26.6091	0.791834	-0.0245705	0.00509367	157.075	0.709227	-0.047813	0.00542353	11.1766	0.772534	0.0175532	0.0047378	10.7474	0.72858	0.0200932	0.00620853	66.3161	0.795153	-0.0435191	0.00582633
Gm09_40105630	17.3959	0.791842	-0.0189652	0.0051036	405.242	0.709102	-0.0736991	0.0054525	34.3525	0.772517	0.0291878	0.00479809	10.5649	0.728581	0.0186516	0.00604416	32.2656	0.795183	-0.028811	0.00605483
Gm09_40108960	66.5529	0.791811	0.0339191	0.00523545	218.407	0.709207	-0.0500373	0.00516172	41.2649	0.772515	-0.0290068	0.00528993	1.38631	0.728588	0.00603128	0.00632864	3.69202	0.795205	0.00884432	0.00604429
Gm09_40158696	363.665	0.791654	-0.0677034	0.00539592	77.1626	0.709281	-0.025349	0.00535103	511.299	0.77225	0.0860943	0.00505601	132.66	0.728511	-0.0480974	0.00602827	228.741	0.79507	-0.0587765	0.0062374
Gm09_40158739	267.247	0.791703	-0.0596464	0.00552701	174.411	0.709239	-0.0390825	0.00544259	610.621	0.772182	0.0968666	0.00501771	272.316	0.728423	-0.0711589	0.00571875	197.906	0.795085	-0.0562833	0.00615731
Gm09_40161201	233.135	0.791722	-0.055825	0.00532627	227.417	0.709216	-0.0447473	0.00538496	691.347	0.772134	0.103226	0.00518778	83.2191	0.728538	-0.0393749	0.00591926	465.583	0.794919	-0.086449	0.00655093
Gm09_40162228	505.82	0.791602	-0.0725506	0.00529578	121.74	0.709266	-0.0294286	0.00576408	945.213	0.772055	0.105339	0.00528394	442.993	0.728355	-0.0785818	0.00585075	279.354	0.795056	-0.0585174	0.00656153
Gm09_40163316	489.079	0.791579	-0.0804807	0.00504287	147.648	0.70925	-0.0358827	0.00589324	882.21	0.772023	0.116132	0.00560973	148.778	0.728498	-0.0525152	0.00620594	265.345	0.795044	-0.0650124	0.00739454
Gm09_40163947	429.101	0.791614	-0.0749839	0.00517632	154.949	0.709248	-0.0365808	0.00575815	968.437	0.771976	0.120949	0.00611185	254.981	0.728435	-0.0682705	0.00636197	290.171	0.795029	-0.0675868	0.00730173
Gm09_40619957	475.583	0.791758	0.0283261	0.0047229	488.147	0.709237	0.0240208	0.00605579	894.654	0.772355	-0.0417269	0.00601635	1844.4	0.728177	0.0677303	0.00714681	1698.51	0.794833	0.0586342	0.00807495
Gm09_40624713	499.921	0.791754	0.0288649	0.00471691	623.995	0.709216	0.0270172	0.00601811	729.225	0.772391	-0.037445	0.00548232	1410.85	0.728276	0.0588841	0.0064992	1322.67	0.794918	0.0514331	0.0070811
Gm09_40625775	564.008	0.791741	0.0308382	0.0046832	470.925	0.70924	0.023573	0.00578633	900.02	0.772354	-0.0418629	0.0056997	1859.75	0.728173	0.0681058	0.00639589	1579.68	0.794859	0.0565598	0.00737077
Gm09_40633806	587.096	0.791736	0.0313544	0.00494726	564.77	0.709225	0.0257301	0.00602499	860.749	0.772363	-0.0407886	0.00557827	1764.56	0.728196	0.0660622	0.00671144	1641.7	0.794847	0.0574468	0.00708876
Gm09_40674166	667.127	0.79172	0.0334857	0.00477159	335.721	0.70926	0.0198794	0.0060126	825.254	0.77237	-0.0400113	0.00488904	1854.32	0.728175	0.0678295	0.0071497	1339	0.794913	0.0519797	0.00686978
Gm09_40771777	140.402	0.791829	0.0137557	0.00511671	620.421	0.709226	0.024327	0.00584083	1567.28	0.77225	-0.0490354	0.00536147	573.884	0.728477	0.0330979	0.00758143	842.938	0.795043	0.036712	0.00699663
Gm09_40788555	81.904	0.791842	0.00838676	0.00455393	642.117	0.709241	0.0197766	0.00577655	1267.39	0.772357	-0.0346985	0.00558197	181.047	0.728562	0.0142387	0.00758466	11.0042	0.795206	0.0033054	0.00693646
Gm09_40829020	0.362391	0.791854	-0.000552775	0.00499448	139.217	0.709297	-0.00926953	0.0057749	62.8479	0.772534	-0.00755898	0.00556484	1721.95	0.728343	-0.0418566	0.00716299	5290.35	0.794409	-0.0709011	0.0103436
Gm09_40907915	106.027	0.791839	-0.00935108	0.00483356	333.884	0.709276	0.0140197	0.0063443	123.097	0.772525	-0.0105947	0.00586423	164.017	0.728565	-0.0132654	0.00749928	86.0439	0.795195	-0.00905378	0.00648436
Gm09_43921862	589.843	0.791797	0.015133	0.00469593	2461.93	0.70913	-0.0258197	0.00598339	1594.8	0.772383	0.0265355	0.00650784	4583.09	0.728107	-0.0501991	0.00785093	259.222	0.795181	0.0109218	0.00605926
Gm09_43927944	419.676	0.791813	0.0127437	0.00468505	2557.52	0.709124	-0.02627	0.00597442	1811.41	0.772362	0.0282332	0.00596585	4967.49	0.728068	-0.0521781	0.00696939	244.253	0.795182	0.0105844	0.00584963
Gm09_44454200	22.3556	0.791852	-0.00286127	0.00471869	7292.37	0.708786	-0.0434257	0.00699001	2125.01	0.772339	0.0294189	0.00589566	3045.12	0.728289	-0.0384266	0.00582363	261.104	0.795182	0.0105397	0.00585662
Gm09_44528953	0.492751	0.791854	0.000295314	0.00489989	14902.9	0.708543	-0.044463	0.00629409	574.365	0.772505	0.0105744	0.00496222	1090.49	0.728515	-0.0157625	0.00519709	4434.1	0.794898	-0.0300263	0.00818267
Gm10_14714	93.3254	0.791805	-0.0329319	0.00488479	60.7939	0.709288	0.0215021	0.00633239	48.5836	0.772516	0.0260117	0.00482328	0.0150625	0.728589	-0.000533419	0.00514717	16.5526	0.795198	0.0154622	0.00663944
Gm10_26376	66.084	0.791819	-0.0278637	0.00517745	226.797	0.709223	0.04174	0.00626242	78.5535	0.772498	0.0332696	0.00452338	63.8466	0.72855	0.034961	0.00538294	79.3062	0.795161	0.0340411	0.00625384
Gm10_63505	59.0506	0.791823	-0.0256168	0.0048619	24.6792	0.709303	0.0134323	0.00564893	101.099	0.772487	0.0365701	0.00454306	12.5826	0.728582	0.0149193	0.00547275	4.63819	0.795205	0.00797998	0.00595215
Gm10_68803	107.525	0.791797	-0.0355842	0.00489884	71.5387	0.709284	0.023468	0.00545622	69.5158	0.772504	0.0313439	0.00464118	1.51725	0.728588	0.00540091	0.0060046	23.4506	0.795194	0.0185386	0.00603115
Gm10_72168	40.072	0.791832	-0.0218271	0.00504304	135.149	0.709259	0.0323985	0.00545683	54.7903	0.772512	0.0279698	0.00462244	1.15147	0.728588	0.00473302	0.00588637	42.5932	0.795183	0.0251113	0.00580202
Gm10_92355	102.85	0.791799	-0.0348273	0.00489117	148.759	0.709254	0.0338607	0.00557387	119.206	0.772475	0.0410772	0.00486206	1.38101	0.728588	0.00515819	0.0065722	10.7854	0.795202	0.0125827	0.00529209
Gm10_94469	98.9536	0.791802	-0.0335569	0.00504127	241.171	0.709219	0.042468	0.00529881	98.4587	0.772488	0.0365476	0.00478724	38.6931	0.728566	0.0265305	0.00652599	11.0885	0.795202	0.0124943	0.0055729
Gm10_109993	100.481	0.7918	-0.0344882	0.00508987	87.9475	0.709277	0.0260819	0.00555365	67.2214	0.772505	0.0309108	0.0047333	0.735289	0.728589	0.00377281	0.00665897	22.483	0.795195	0.0182038	0.00558121
Gm10_115205	32.8474	0.791836	-0.0197356	0.00490545	102.423	0.709272	0.0281678	0.00565599	32.0712	0.772525	0.0213694	0.00496383	7.33545	0.728585	0.0119274	0.00628039	23.0081	0.795194	0.0184306	0.00578413
Gm10_121493	67.3317	0.791818	-0.0281349	0.00510841	140.813	0.709257	0.0328942	0.00533785	55.3949	0.772512	0.0279542	0.00495377	9.9733	0.728583	0.0138328	0.0063843	16.4386	0.795198	0.0155072	0.00555366
Gm10_150503	56.2956	0.791824	-0.0254311	0.00504873	196.434	0.709236	0.0384629	0.00557441	64.111	0.772507	0.0296725	0.00547272	42.2243	0.728563	0.0279711	0.00623285	40.0922	0.795185	0.0238991	0.00552534
Gm10_169010	6.58796	0.79185	-0.00834199	0.00526167	57.2511	0.709291	0.0199807	0.00567176	6.87902	0.772539	0.00927979	0.00539644	0.0540386	0.728589	-0.000946653	0.00653808	49.1456	0.795181	0.0252722	0.00580901
Gm10_173179	88.1366	0.791809	-0.0310128	0.0052306	49.8191	0.709293	0.0189165	0.0060151	46.6417	0.772518	0.0246119	0.00526634	9.34282	0.728584	-0.0127327	0.00630469	8.33027	0.795203	0.0105962	0.00582535
Gm10_182308	96.4082	0.791803	-0.0336732	0.00515834	4.05875	0.709311	0.00559338	0.0057353	20.7995	0.772531	0.0171046	0.00542834	45.9794	0.728561	-0.029537	0.00648612	13.0127	0.7952	0.0137792	0.00580419
Gm10_188982	2.92825	0.791852	0.00568748	0.00510167	34.6807	0.709299	-0.0159025	0.0056676	4.04128	0.772541	-0.00727435	0.00523534	0.845145	0.728589	-0.00382766	0.00626591	94.9659	0.795154	0.0359277	0.00571128
Gm10_191421	44.7123	0.79183	-0.0229387	0.00535148	0.0427485	0.709312	-0.00057483	0.0055473	8.44663	0.772538	0.0108899	0.00566287	62.6294	0.728551	-0.0343434	0.00592252	85.6749	0.795157	0.0353254	0.00585168
Gm10_193768	11.5591	0.791848	-0.0106709	0.0054153	3.0206	0.709311	-0.00445844	0.00525576	0.681005	0.772543	0.00279991	0.00537439	7.76812	0.728585	-0.0107237	0.00663267	55.7386	0.795178	0.0258266	0.00626227
Gm10_197104	57.1107	0.791824	-0.0257463	0.00511347	21.9461	0.709304	0.0129419	0.00568697	39.0491	0.772521	0.0232375	0.00555099	1.08416	0.728589	0.00447882	0.0065611	155.558	0.795117	0.0472416	0.00585379
Gm10_199444	80.2204	0.791812	-0.030457	0.00514254	52.4052	0.709292	0.0199611	0.00570598	32.8427	0.772525	0.0212708	0.00521343	5.96293	0.728586	-0.0104829	0.00699946	112.455	0.795142	0.0400922	0.00606103
Gm10_212815	65.7185	0.791819	-0.0274237	0.00535335	206.183	0.709231	-0.0399785	0.00556493	501.063	0.772269	0.0810877	0.00544119	135.378	0.728512	-0.0468321	0.00736552	1325.8	0.794449	0.134531	0.00640188
Gm10_219122	79.6867	0.791813	-0.0297869	0.00512638	306.997	0.709192	-0.0481865	0.0056376	595.063	0.772223	0.0870097	0.00627216	23.7463	0.728576	-0.01925	0.00758003	1064.69	0.794607	0.118756	0.0062388
Gm10_242267	0.845923	0.791853	-0.0028467	0.00510254	3.65599	0.709311	-0.00488354	0.00535764	87.408	0.772499	0.0309859	0.00558805	2877.52	0.727087	-0.197808	0.00857394	389.048	0.795004	0.0666992	0.00604643
Gm10_253048	0.681423	0.791853	-0.00258525	0.00505353	2.43963	0.709311	-0.00403323	0.0052508	228.711	0.772427	0.050765	0.00562226	2618.11	0.727201	-0.191597	0.00786262	452.813	0.794968	0.0728763	0.00651144
Gm10_259106	4.26673	0.791852	0.00644765	0.00463562	12.7967	0.709307	-0.00920837	0.00515618	186.844	0.772449	0.0457211	0.0057433	2490.51	0.727274	-0.186102	0.00790105	453.96	0.794968	0.0727096	0.00622016
Gm10_279112	3.20404	0.791852	-0.00558692	0.00482043	0.058061	0.709312	-0.000620397	0.00534439	257.822	0.772413	0.0536888	0.00580896	2072.22	0.727495	-0.1697	0.00769083	307.606	0.795045	0.059841	0.00594085
Gm10_301394	8.51649	0.79185	-0.00918153	0.00508354	113.269	0.70927	-0.0276153	0.00544079	349.562	0.772365	0.0630207	0.00540632	2761.55	0.72712	-0.1975	0.00772166	298.171	0.795049	0.0593954	0.00569656
Gm10_316786	2.31614	0.791853	0.0046256	0.00536671	169.308	0.709252	-0.0327068	0.00544064	203.697	0.772443	0.0463309	0.00551892	1923.24	0.727609	-0.157827	0.00777124	269.769	0.795069	0.0544217	0.00605066
Gm10_350325	58.3994	0.791826	-0.0235345	0.00540506	50.8981	0.709294	-0.0181664	0.00527592	409.631	0.77234	0.0665863	0.00566467	2811.24	0.727137	-0.193433	0.00929487	388.267	0.795006	0.06617	0.0060534
Gm10_352528	14.5038	0.791847	-0.0117265	0.0056946	1.3434	0.709312	-0.00295133	0.00560552	351.59	0.772369	0.0616684	0.00567495	3275.36	0.7269	-0.208553	0.0094913	378.066	0.795011	0.0652725	0.00622483
Gm10_355691	23.0762	0.791843	-0.0145871	0.00594316	99.78	0.709277	-0.025123	0.00536069	508.448	0.772295	0.0729849	0.00716824	3571.06	0.726784	-0.213455	0.0107045	343.407	0.795032	0.0612422	0.00634567
Gm10_430625	99.7363	0.791793	-0.0395083	0.00575357	182.825	0.709227	-0.0443526	0.00563874	725.72	0.772086	0.112501	0.00577289	5.73968	0.728586	-0.0107706	0.0123688	3.61862	0.795206	0.00812321	0.00609036
Gm10_452742	656.722	0.791562	0.0738007	0.00631382	70.1684	0.709288	-0.0202721	0.00596347	29.4259	0.77253	-0.0163666	0.00650476	959.652	0.728152	-0.0995672	0.00922388	14.6118	0.795201	-0.0117945	0.00602219
Gm10_458839	658.645	0.791625	0.0577731	0.00604269	1148.46	0.709	-0.0649034	0.00561773	387.068	0.772406	-0.0460616	0.00770523	37.7098	0.728576	-0.0152092	0.0080888	2.70021	0.795207	-0.00393745	0.00622295
Gm10_474540	91.1447	0.79179	-0.0430692	0.00550235	147.35	0.709235	-0.0450224	0.00592949	228.966	0.772377	0.0729073	0.00614021	9.86402	0.728582	0.0166599	0.00735202	1.08807	0.795207	-0.00513185	0.00583118
Gm10_533855	15.5676	0.791846	-0.0126638	0.00504446	1763.95	0.70864	-0.112966	0.00567373	49.7502	0.772517	0.0239066	0.00609922	681.109	0.728235	0.0958164	0.00847104	5.21393	0.795205	0.00790879	0.00625908
Gm10_537905	134.975	0.791746	-0.0603213	0.00484096	124.518	0.709238	-0.0469313	0.00560113	597.571	0.772036	0.137808	0.00605894	100.917	0.728497	-0.0644174	0.00723102	134.813	0.795088	-0.0667475	0.00589823
Gm10_545297	138.475	0.791739	-0.0630994	0.00513638	104.609	0.709248	-0.044288	0.00537693	380.403	0.772208	0.113974	0.00530261	0.139048	0.728589	-0.00249505	0.00669169	160.492	0.79506	-0.0754475	0.00603084
Gm10_548376	0.00435239	0.791854	-0.000352495	0.00490041	131.743	0.709231	-0.0495438	0.00570234	118.846	0.772439	0.0634631	0.00541238	12.4802	0.728577	0.0235325	0.00609314	18.7985	0.795191	-0.0257206	0.00565871
Gm10_550977	170.658	0.791709	-0.0714945	0.00486215	83.549	0.70926	-0.0403011	0.00539646	457.941	0.77213	0.127981	0.00498167	16.9098	0.728573	-0.0283172	0.0061716	147.874	0.795068	-0.0741054	0.00595555
Gm10_554538	96.3866	0.791771	-0.0545144	0.00479394	85.3805	0.709258	-0.0412936	0.00551896	197.949	0.772362	0.0854876	0.00511826	0.203477	0.728589	-0.00316203	0.00559959	220.361	0.794997	-0.091863	0.00590374
Gm10_557562	36.592	0.791824	-0.0323161	0.00512452	22.3967	0.709298	-0.020419	0.00552935	87.1594	0.772466	0.0543681	0.00520637	29.8983	0.728561	0.036462	0.00553798	142.45	0.795077	-0.0708126	0.00598621
Gm10_563823	3.04096	0.791851	0.00943983	0.0048404	82.404	0.709261	-0.039674	0.00514536	37.3665	0.77251	0.0360749	0.00510695	1.69438	0.728588	0.00879167	0.0058927	51.1399	0.79516	-0.042999	0.0063509
Gm10_567596	27.4837	0.79183	-0.029246	0.00497714	11.9776	0.709305	-0.0154989	0.00549251	142.216	0.772412	0.0728414	0.00516639	0.00210803	0.728589	-0.000322905	0.0056365	91.251	0.79512	-0.0594269	0.00625733
Gm10_571121	16.4316	0.791842	-0.018042	0.00537566	62.2291	0.70928	-0.0288943	0.0055218	40.6316	0.772514	0.0302766	0.00525133	1.25617	0.728588	0.00584693	0.00578644	143.381	0.7951	-0.0580607	0.00586655
Gm10_575374	53.5976	0.791808	-0.0400623	0.00524787	6.3675	0.709308	-0.0111318	0.00529697	238.395	0.772328	0.0922585	0.00528467	0.773502	0.728588	-0.00603795	0.00560636	150.246	0.795066	-0.0746186	0.00581006
Gm10_579079	14.8416	0.791842	0.0205429	0.00507727	35.5998	0.70929	-0.0257165	0.00556769	0.95697	0.772542	0.00568019	0.00528272	78.359	0.728516	0.0586904	0.00589945	2.71698	0.795206	0.00975275	0.0057035
Gm10_583437	53.16	0.791814	-0.0352804	0.00539705	35.7249	0.709292	0.0235636	0.00542875	200.952	0.772385	0.0740409	0.0049085	42.9385	0.728553	0.038482	0.0060181	136.382	0.795095	-0.0622092	0.00591653
[truncated: 2,309 more rows]
